# Supplementary material for: Decoding the Geography of Natural TBEV Microfoci in Germany: A Geostatistical Approach Based on Land-Use Patterns and Climatological Conditions
Source: Int J Environ Res Public Health. 2022 Sep 19;19(18):11830. doi: 10.3390/ijerph191811830 (PMC9517139; doi:10.3390/ijerph191811830)
Supplement: Supplementary file 1 [file ijerph-19-11830-s001.zip]

Archive with 5 entries (5 files):
- Suppl 1. Material and methods.pdf
- suppl. fig 1.pdf
- suppl. fig 2.pdf
- suppl. fig 3.pdf
- suppl. fig 4.pdf
