# Supplementary figures and images for: Decoding the Geography of Natural TBEV Microfoci in Germany: A Geostatistical Approach Based on Land-Use Patterns and Climatological Conditions
Source: MDPI journal article supplement (doi:10.3390/ijerph191811830), 2022-09-19

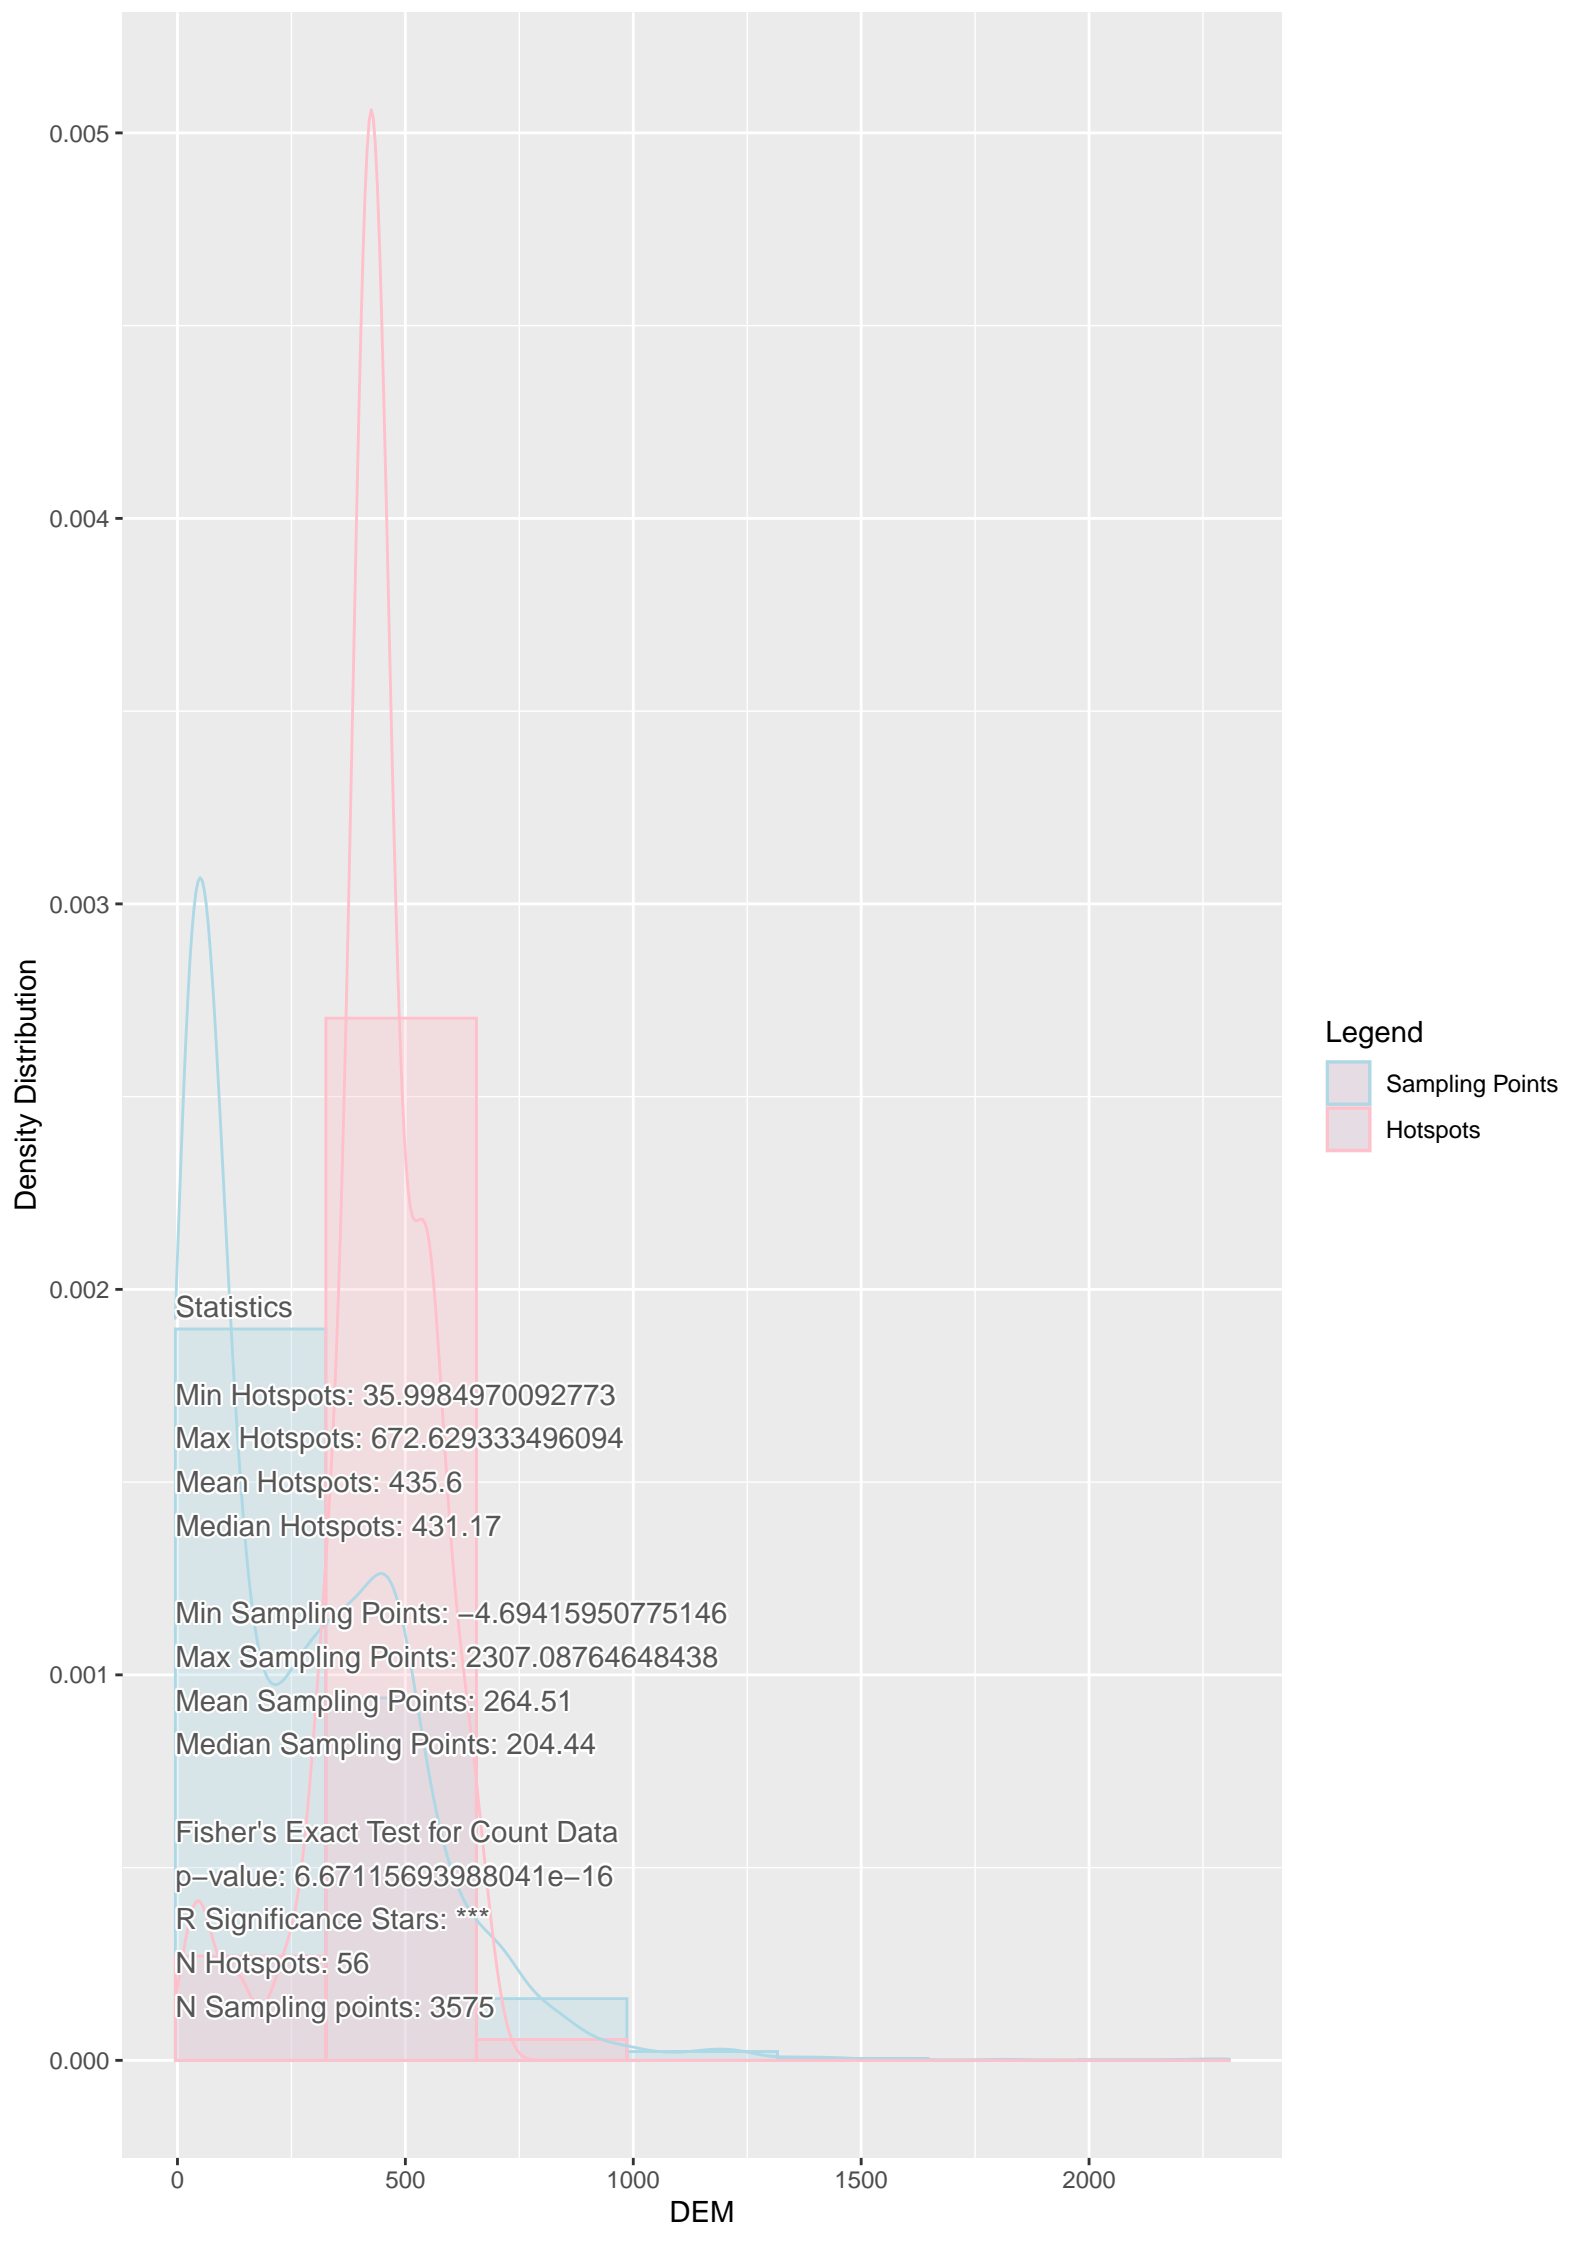

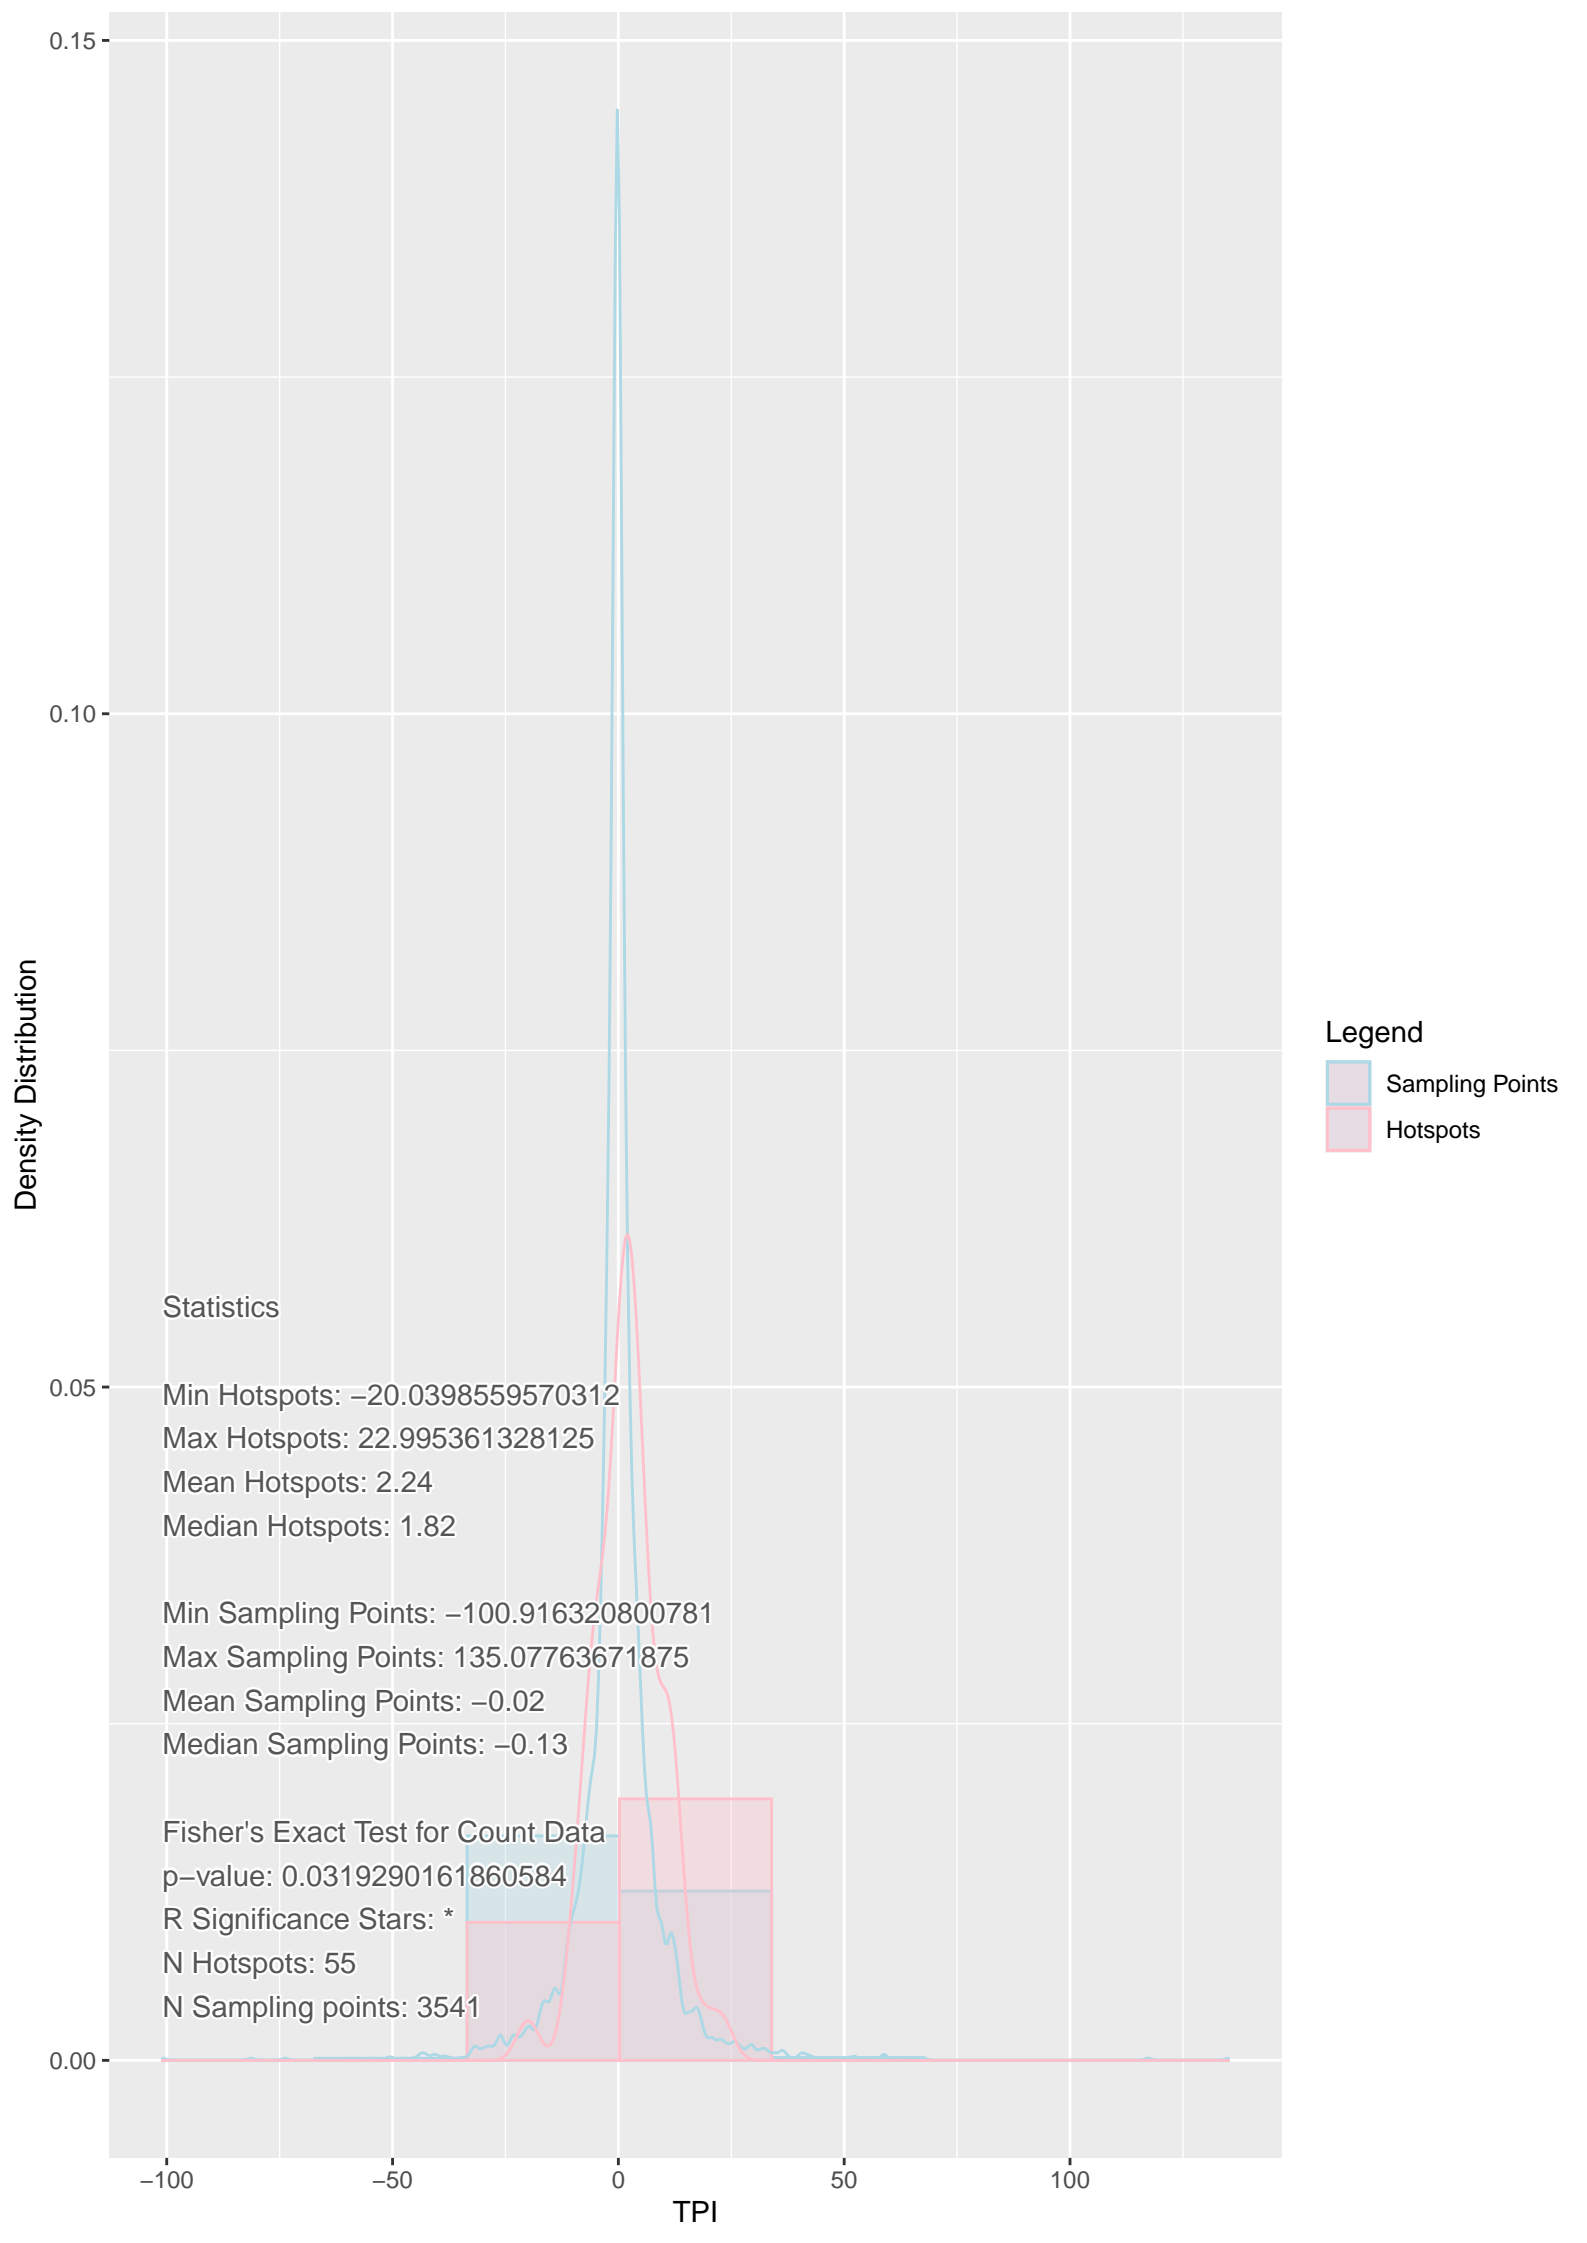

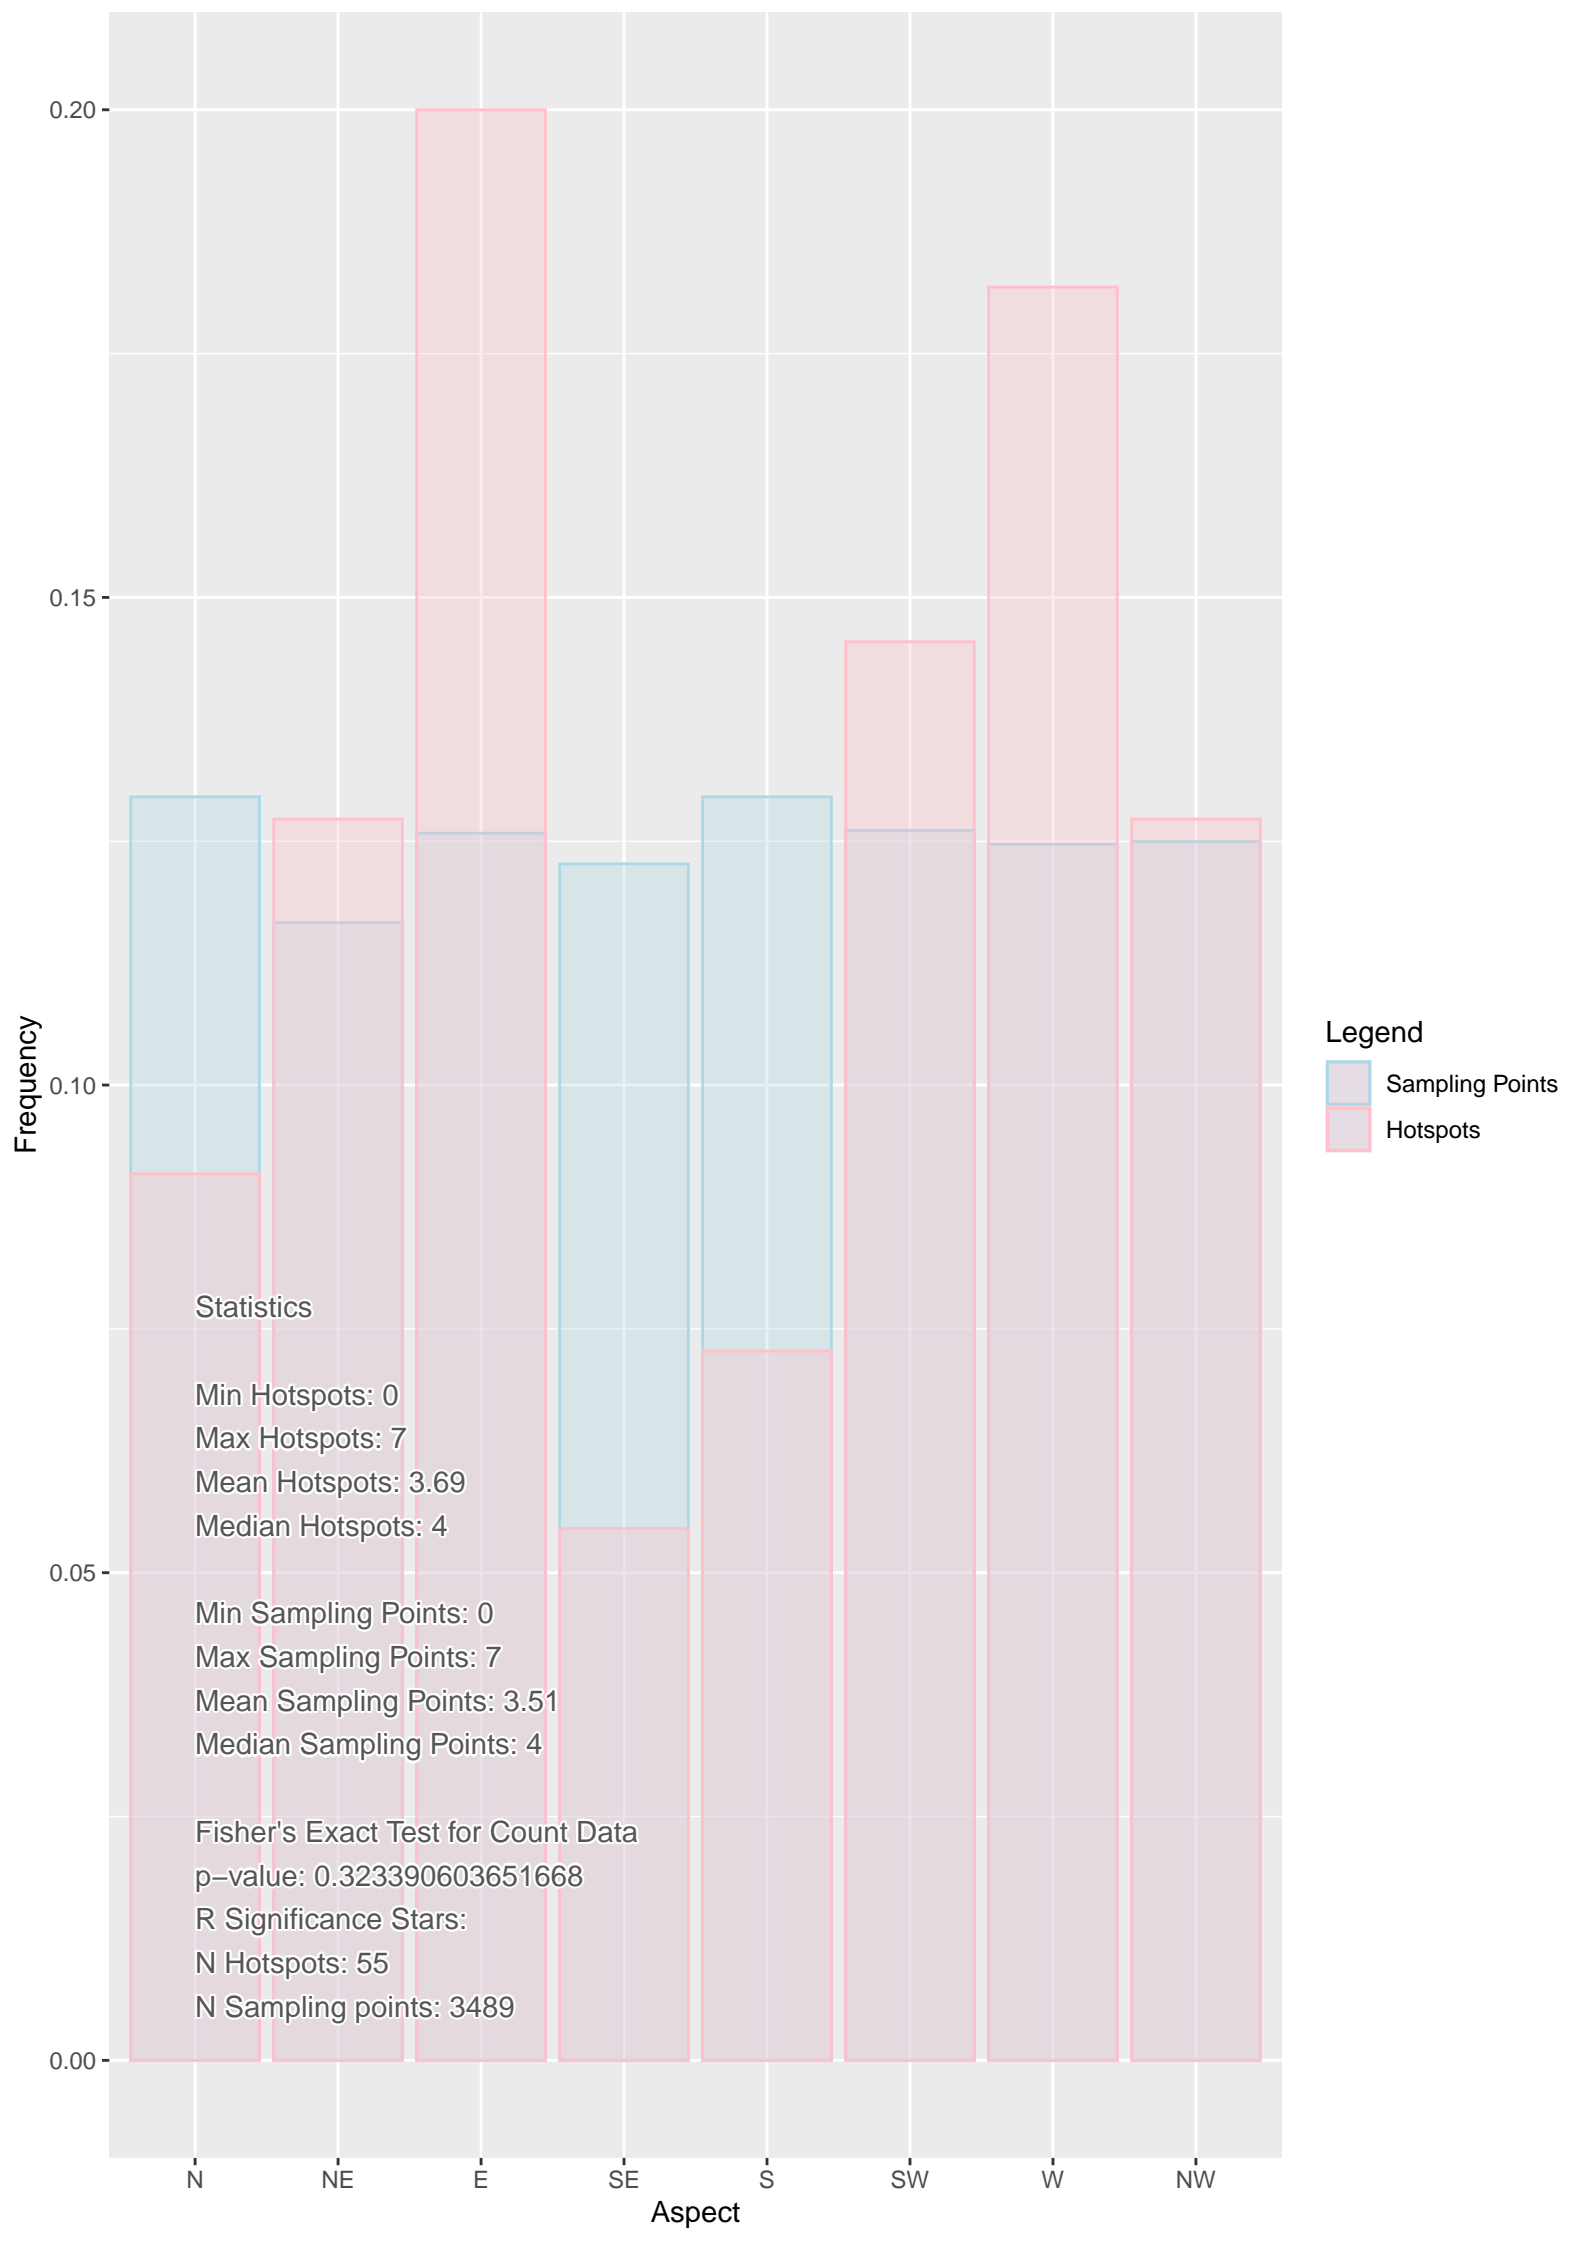

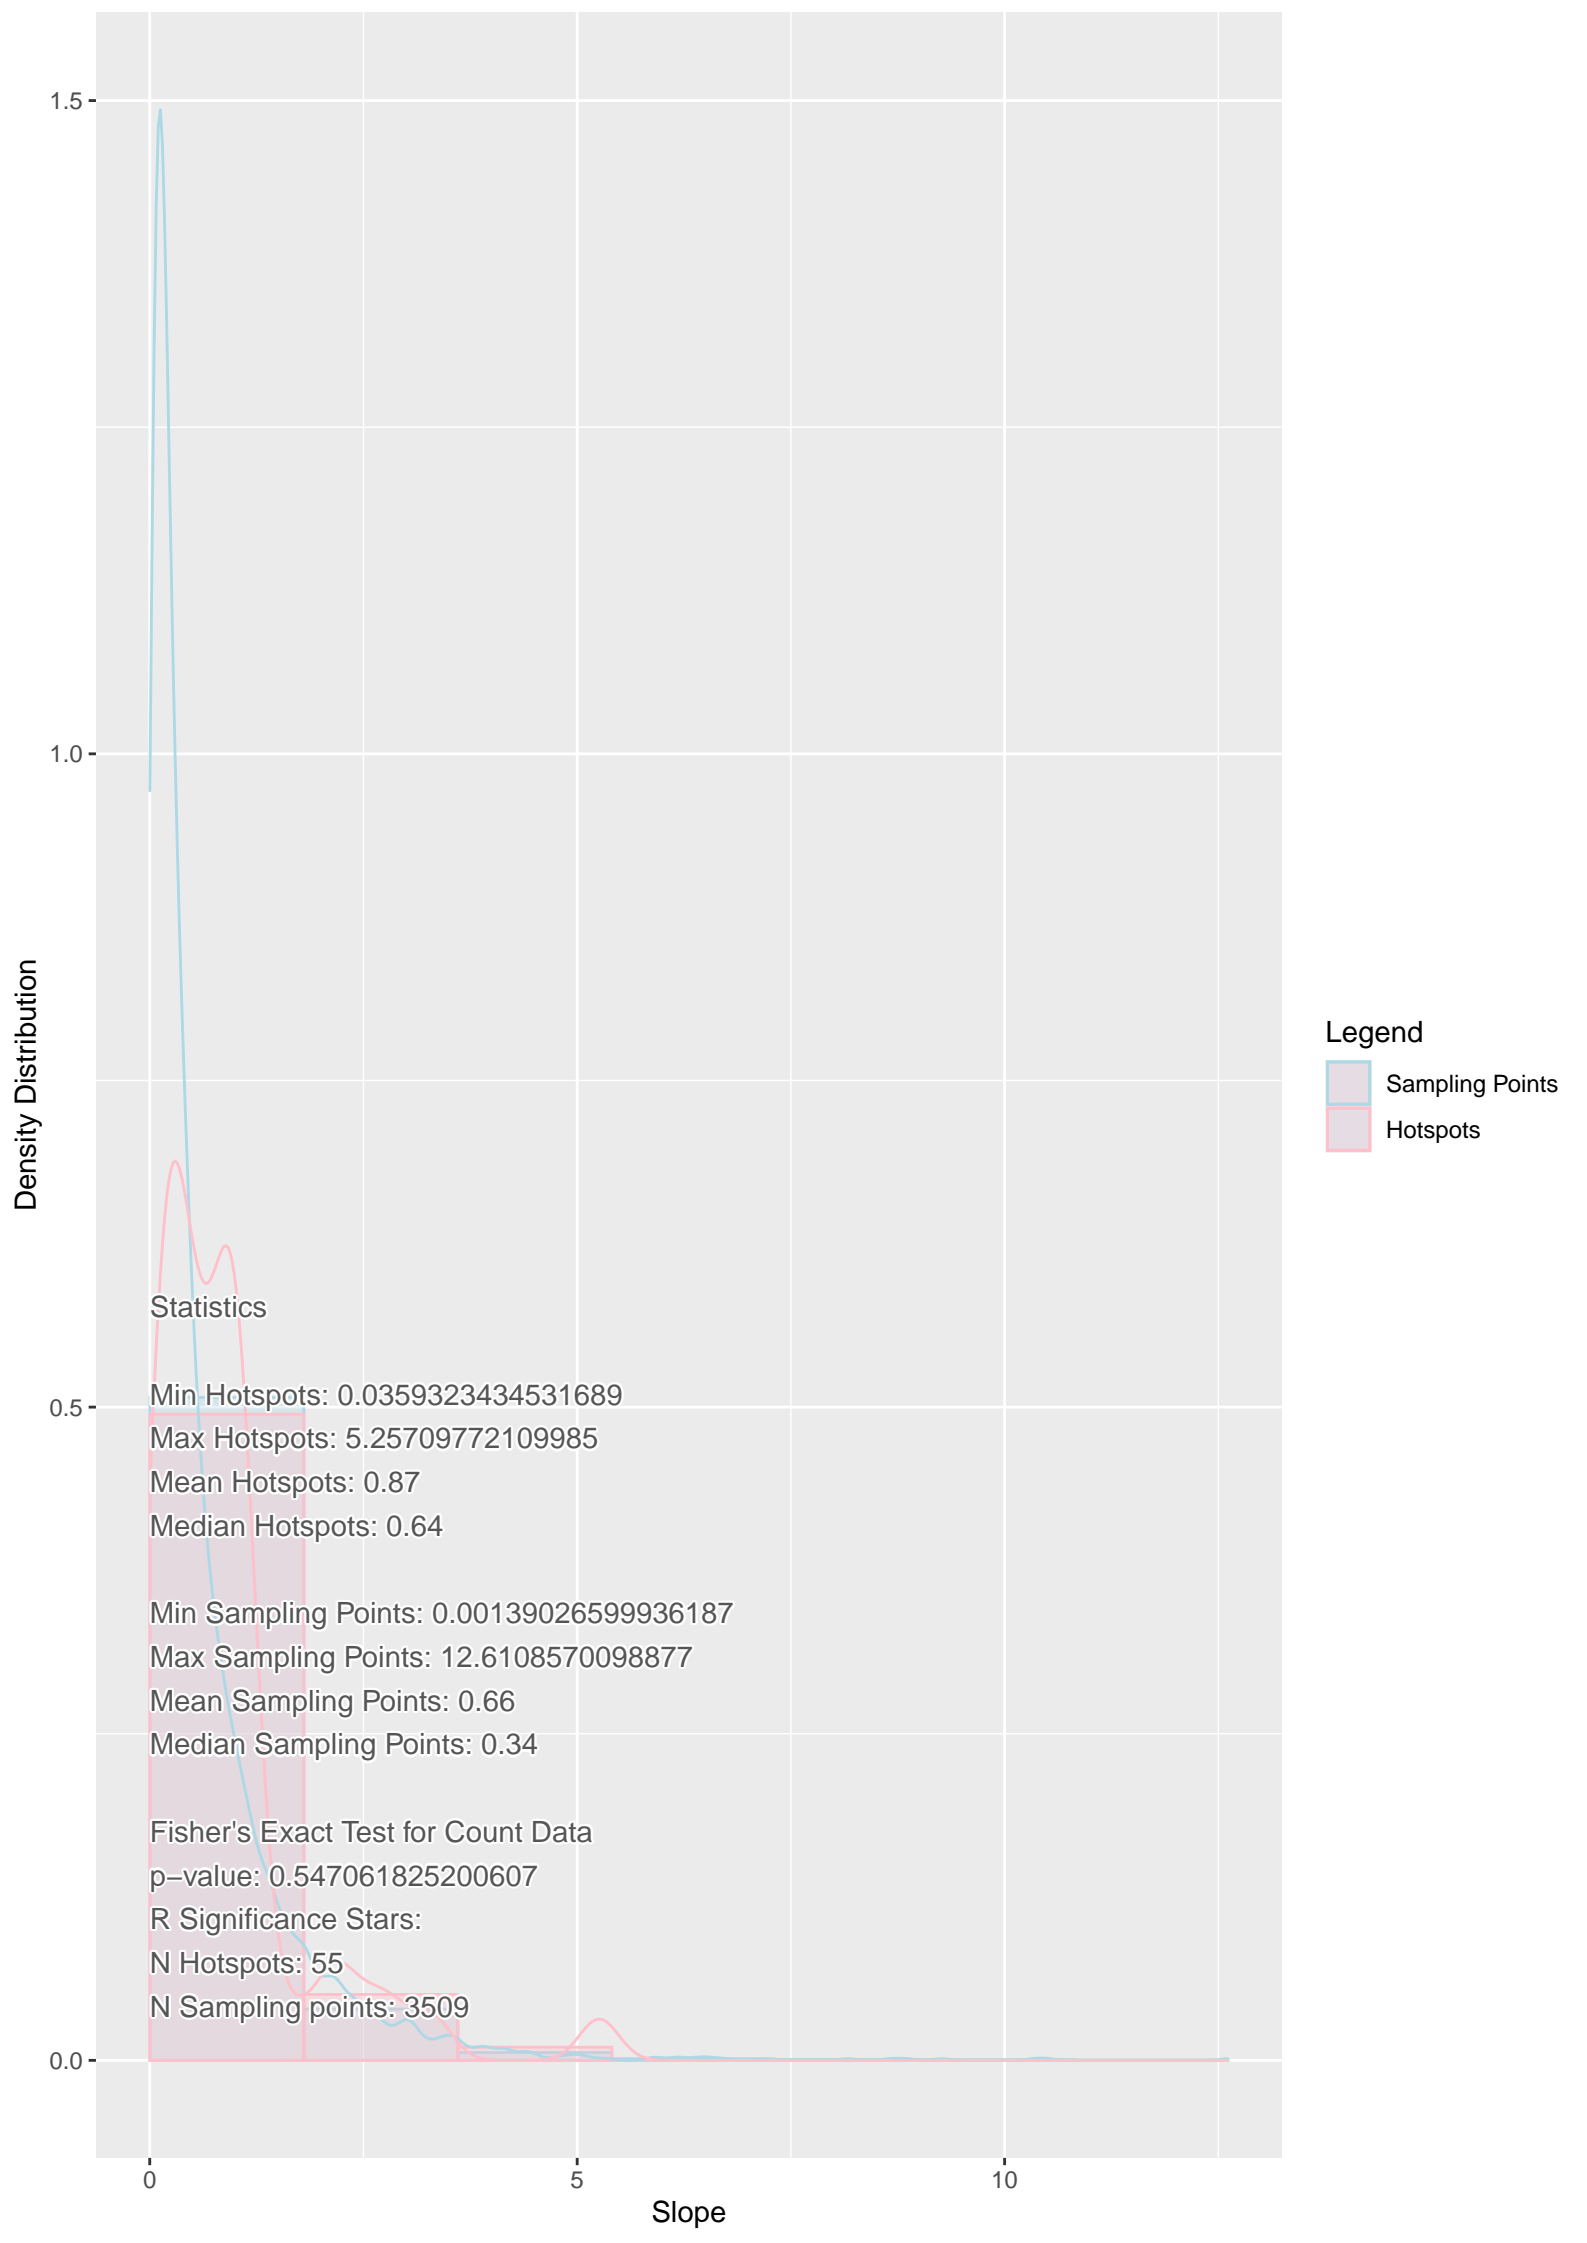

Supplement: s1 [file s1]

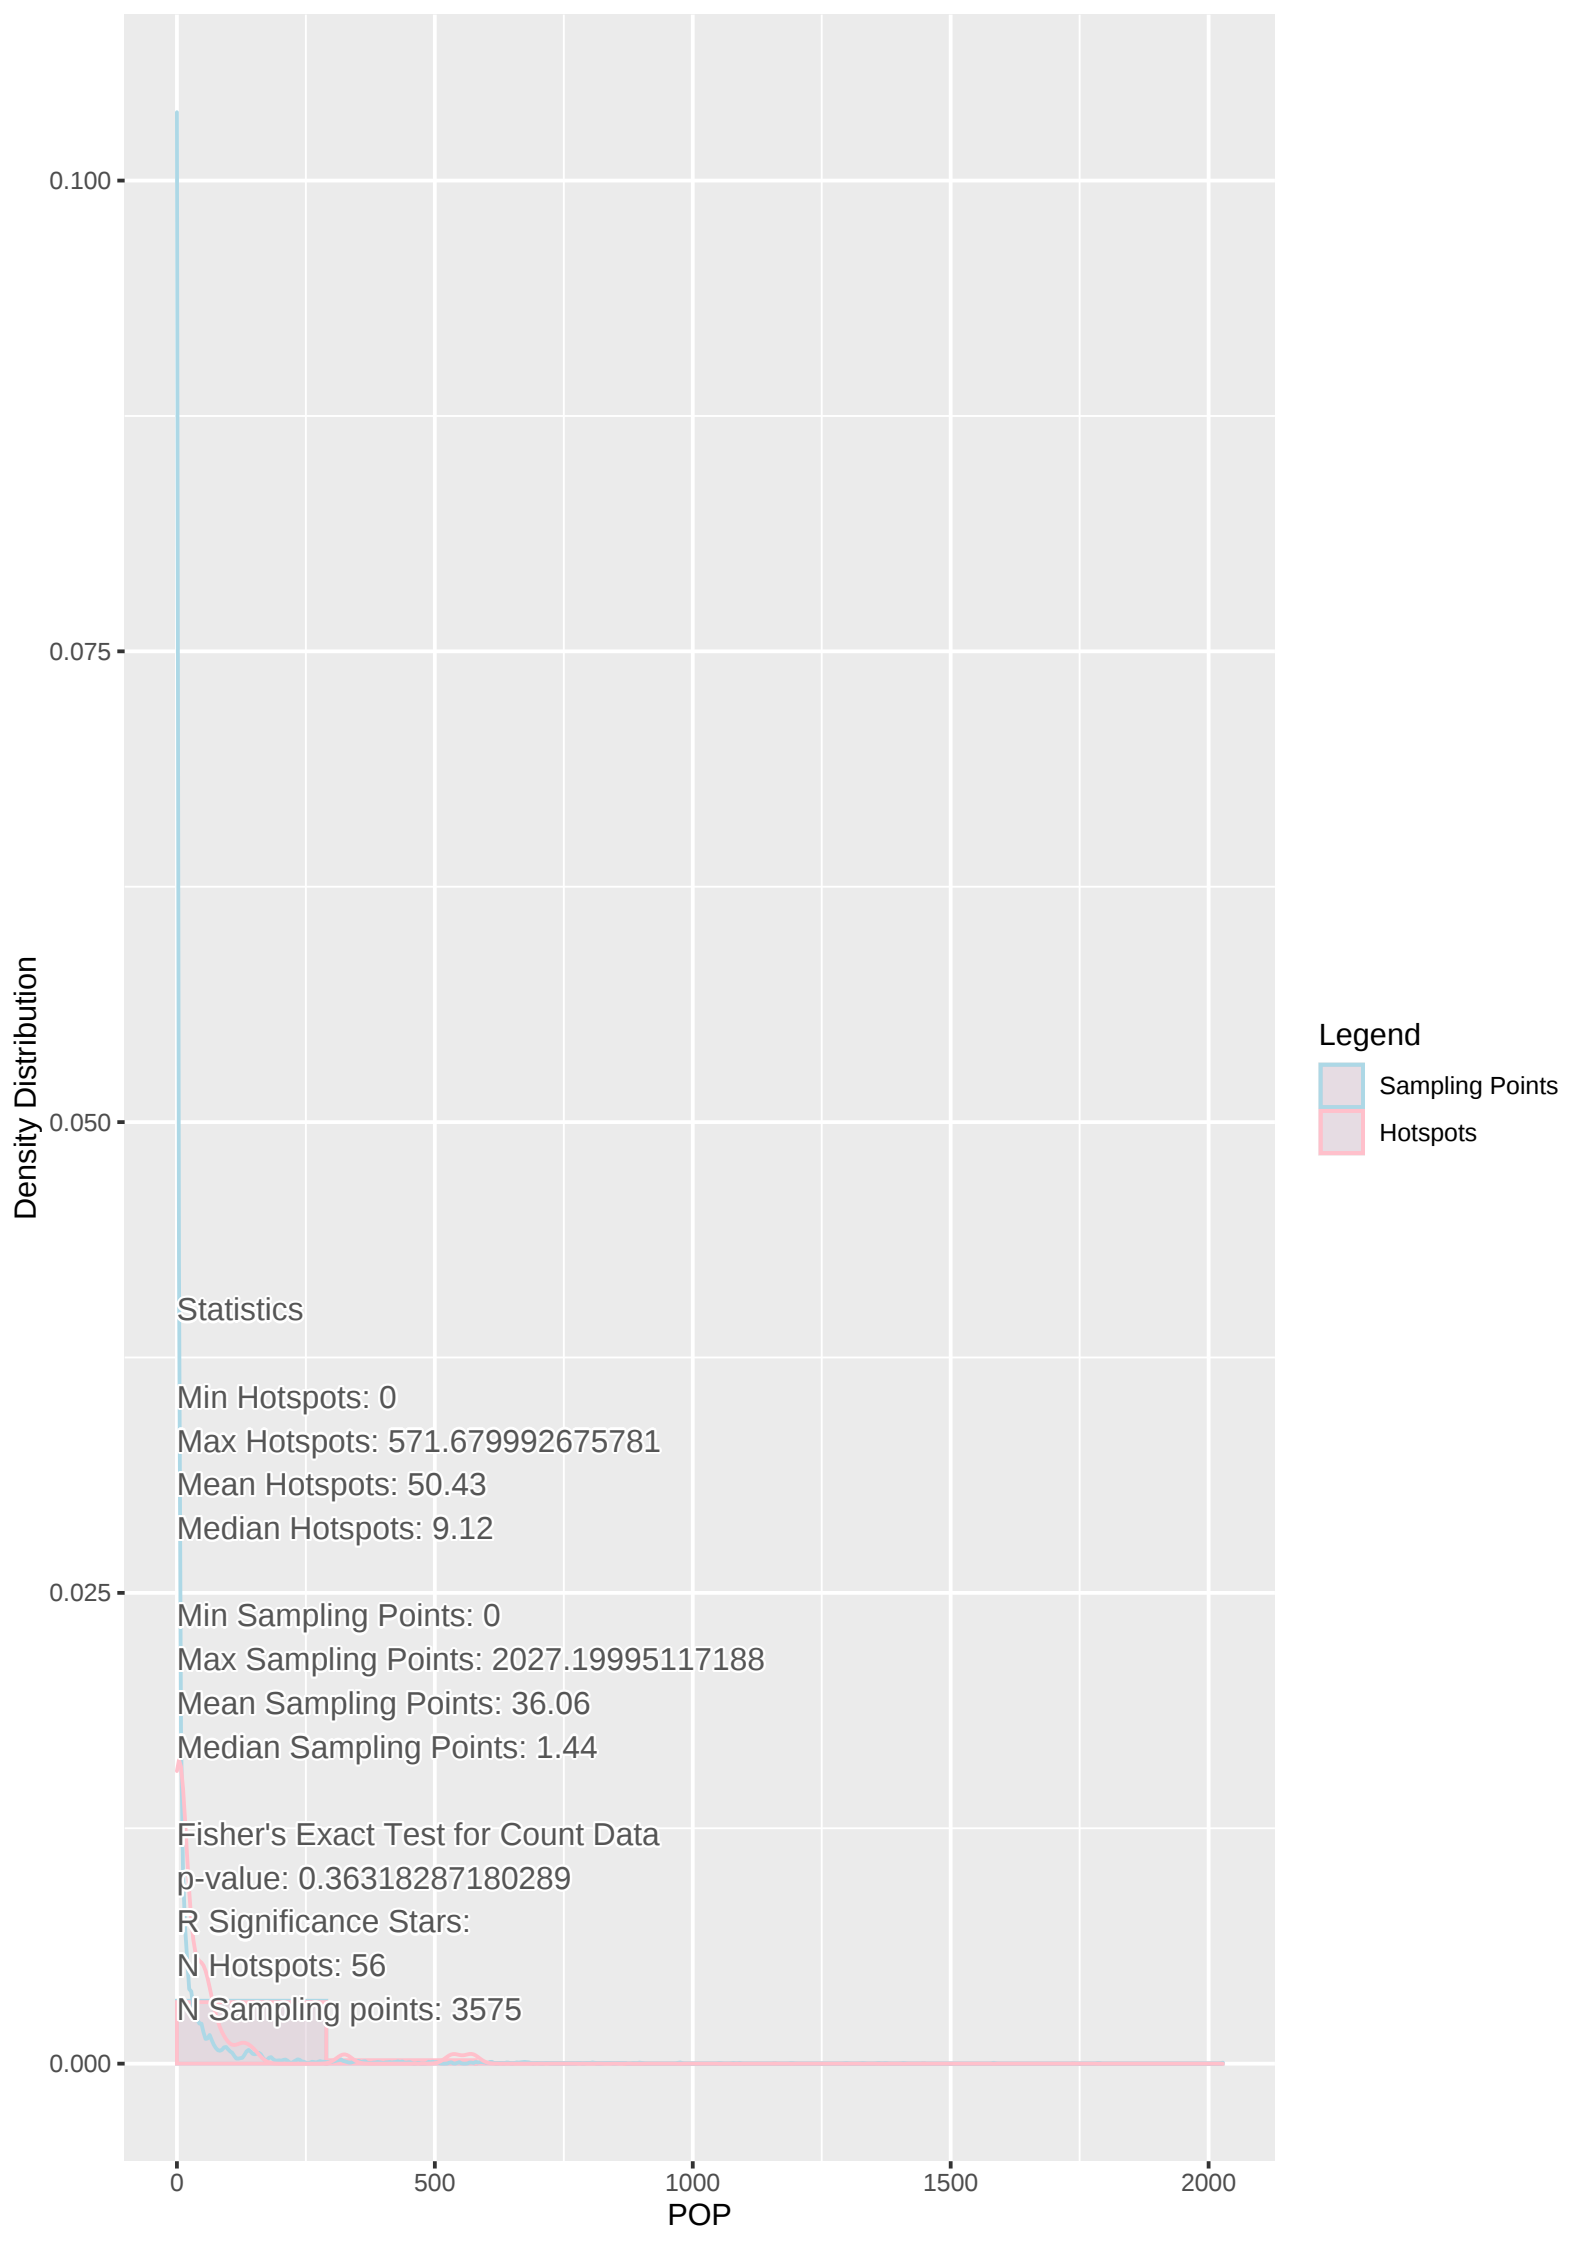

Supplement: s1 [file s1]

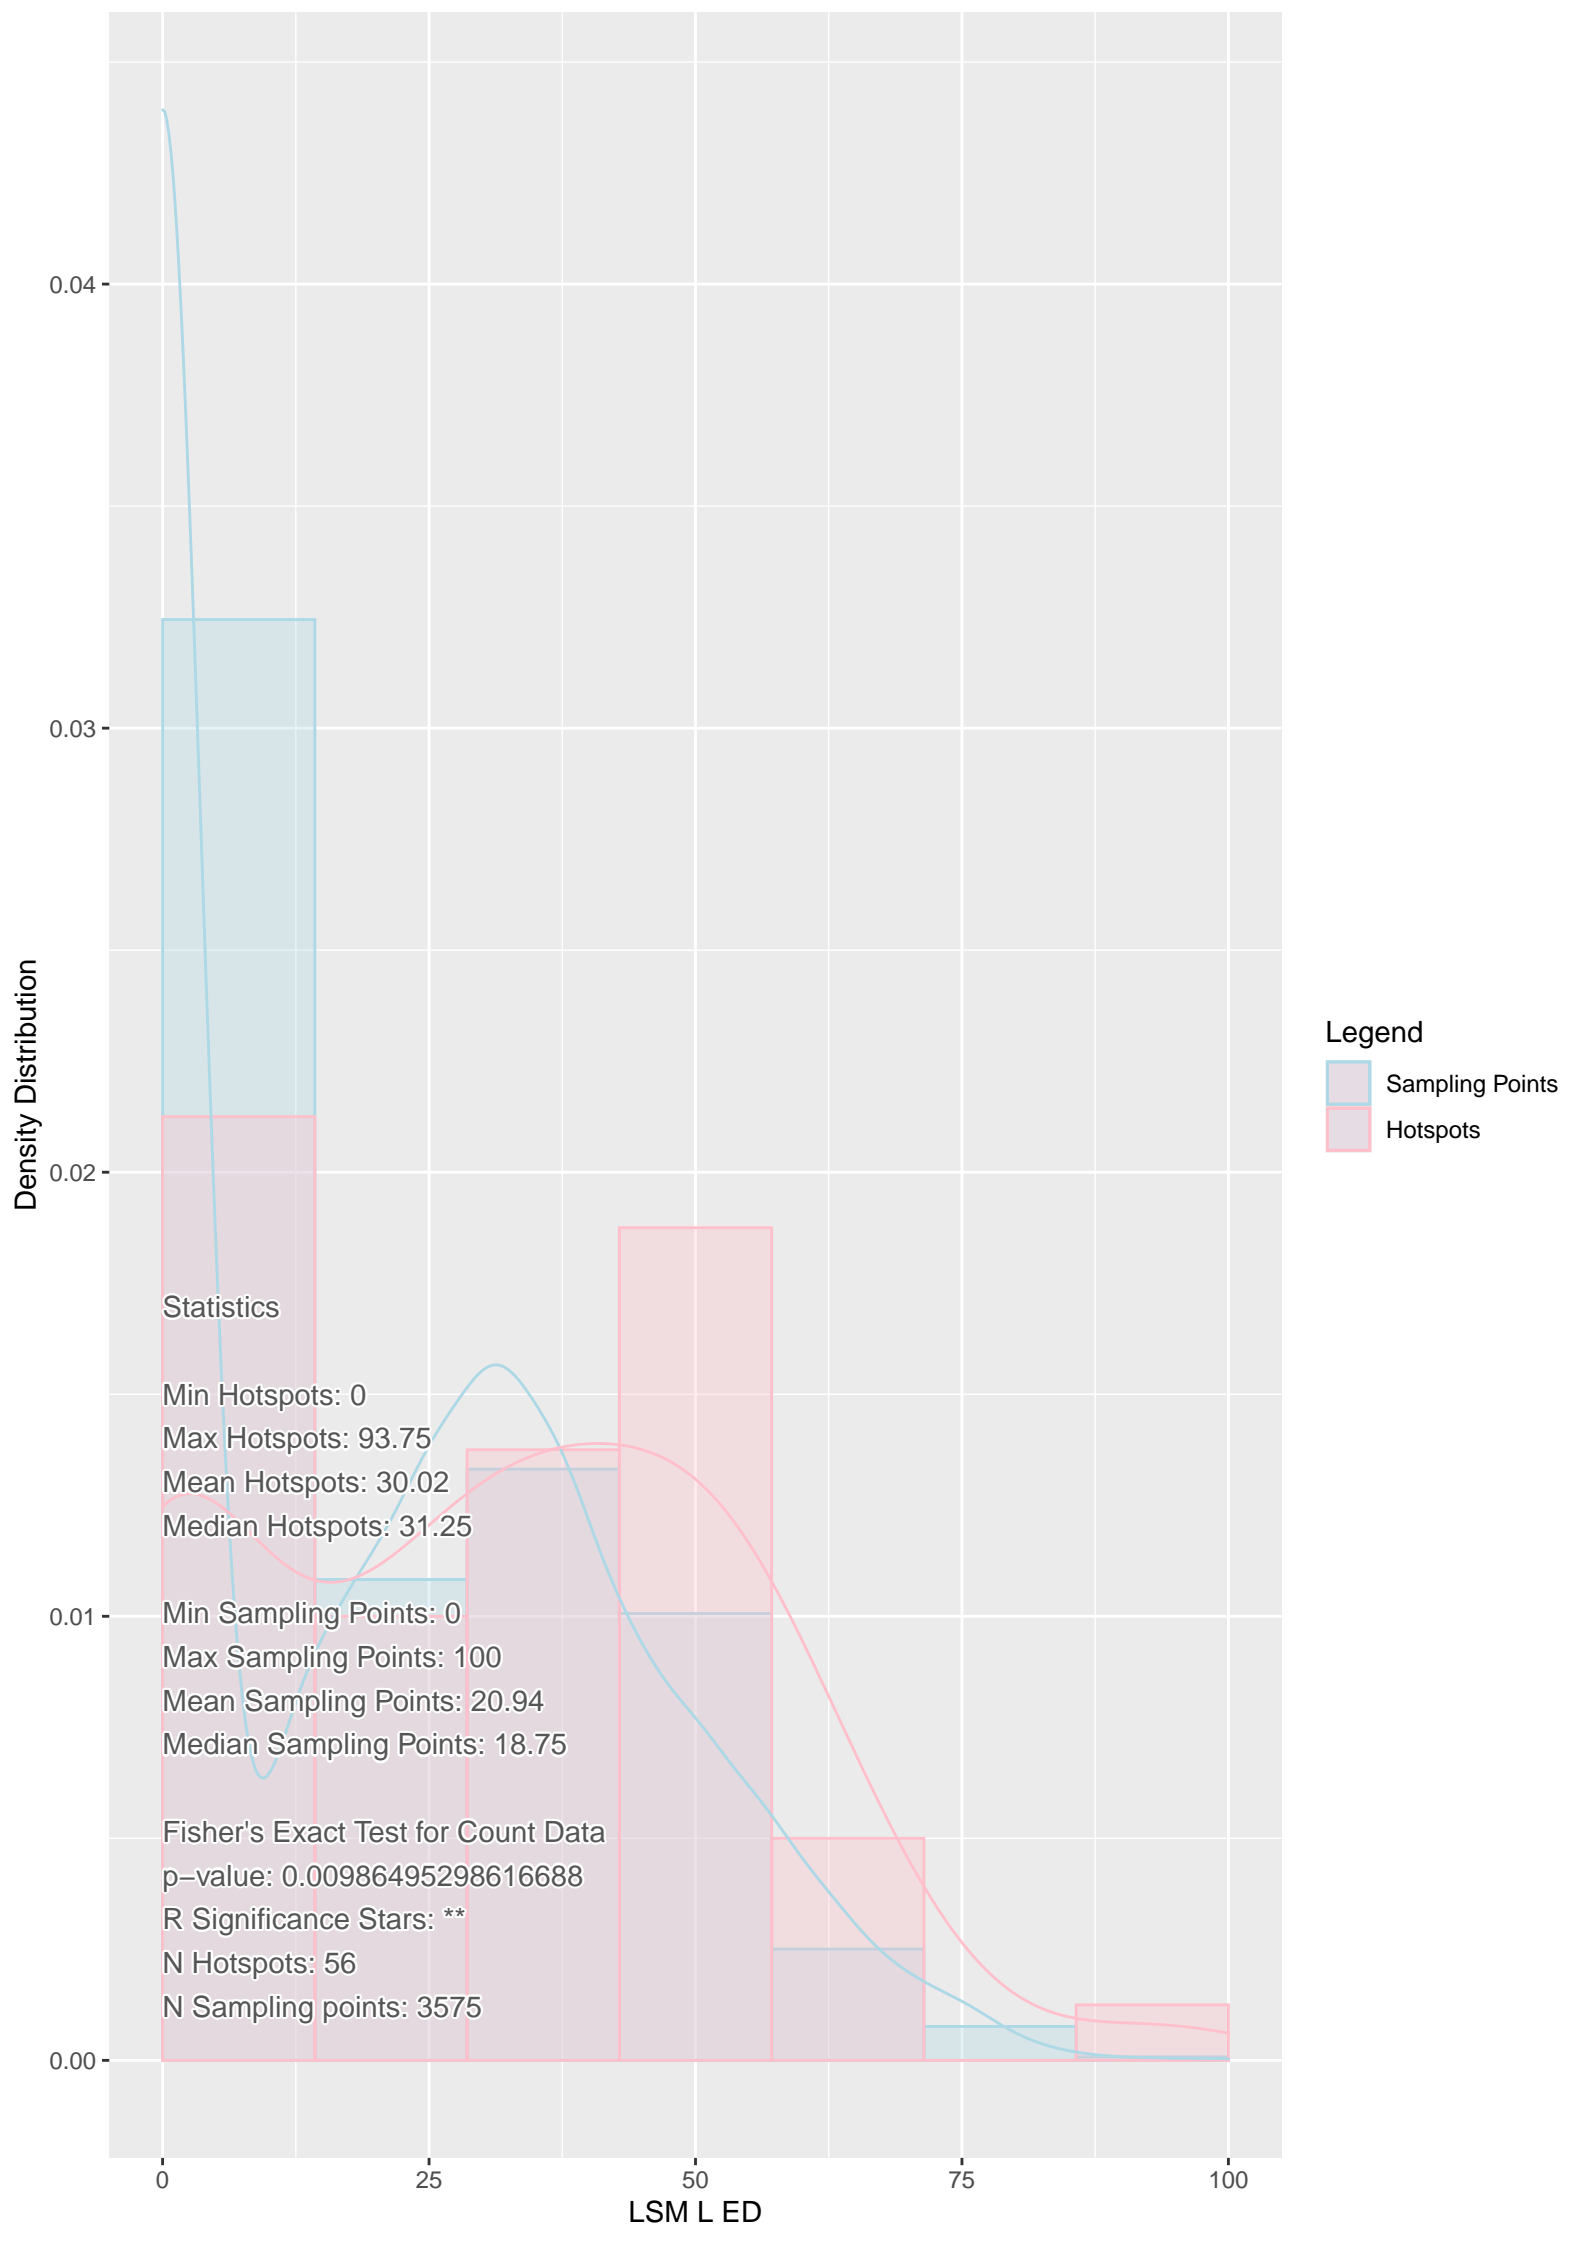

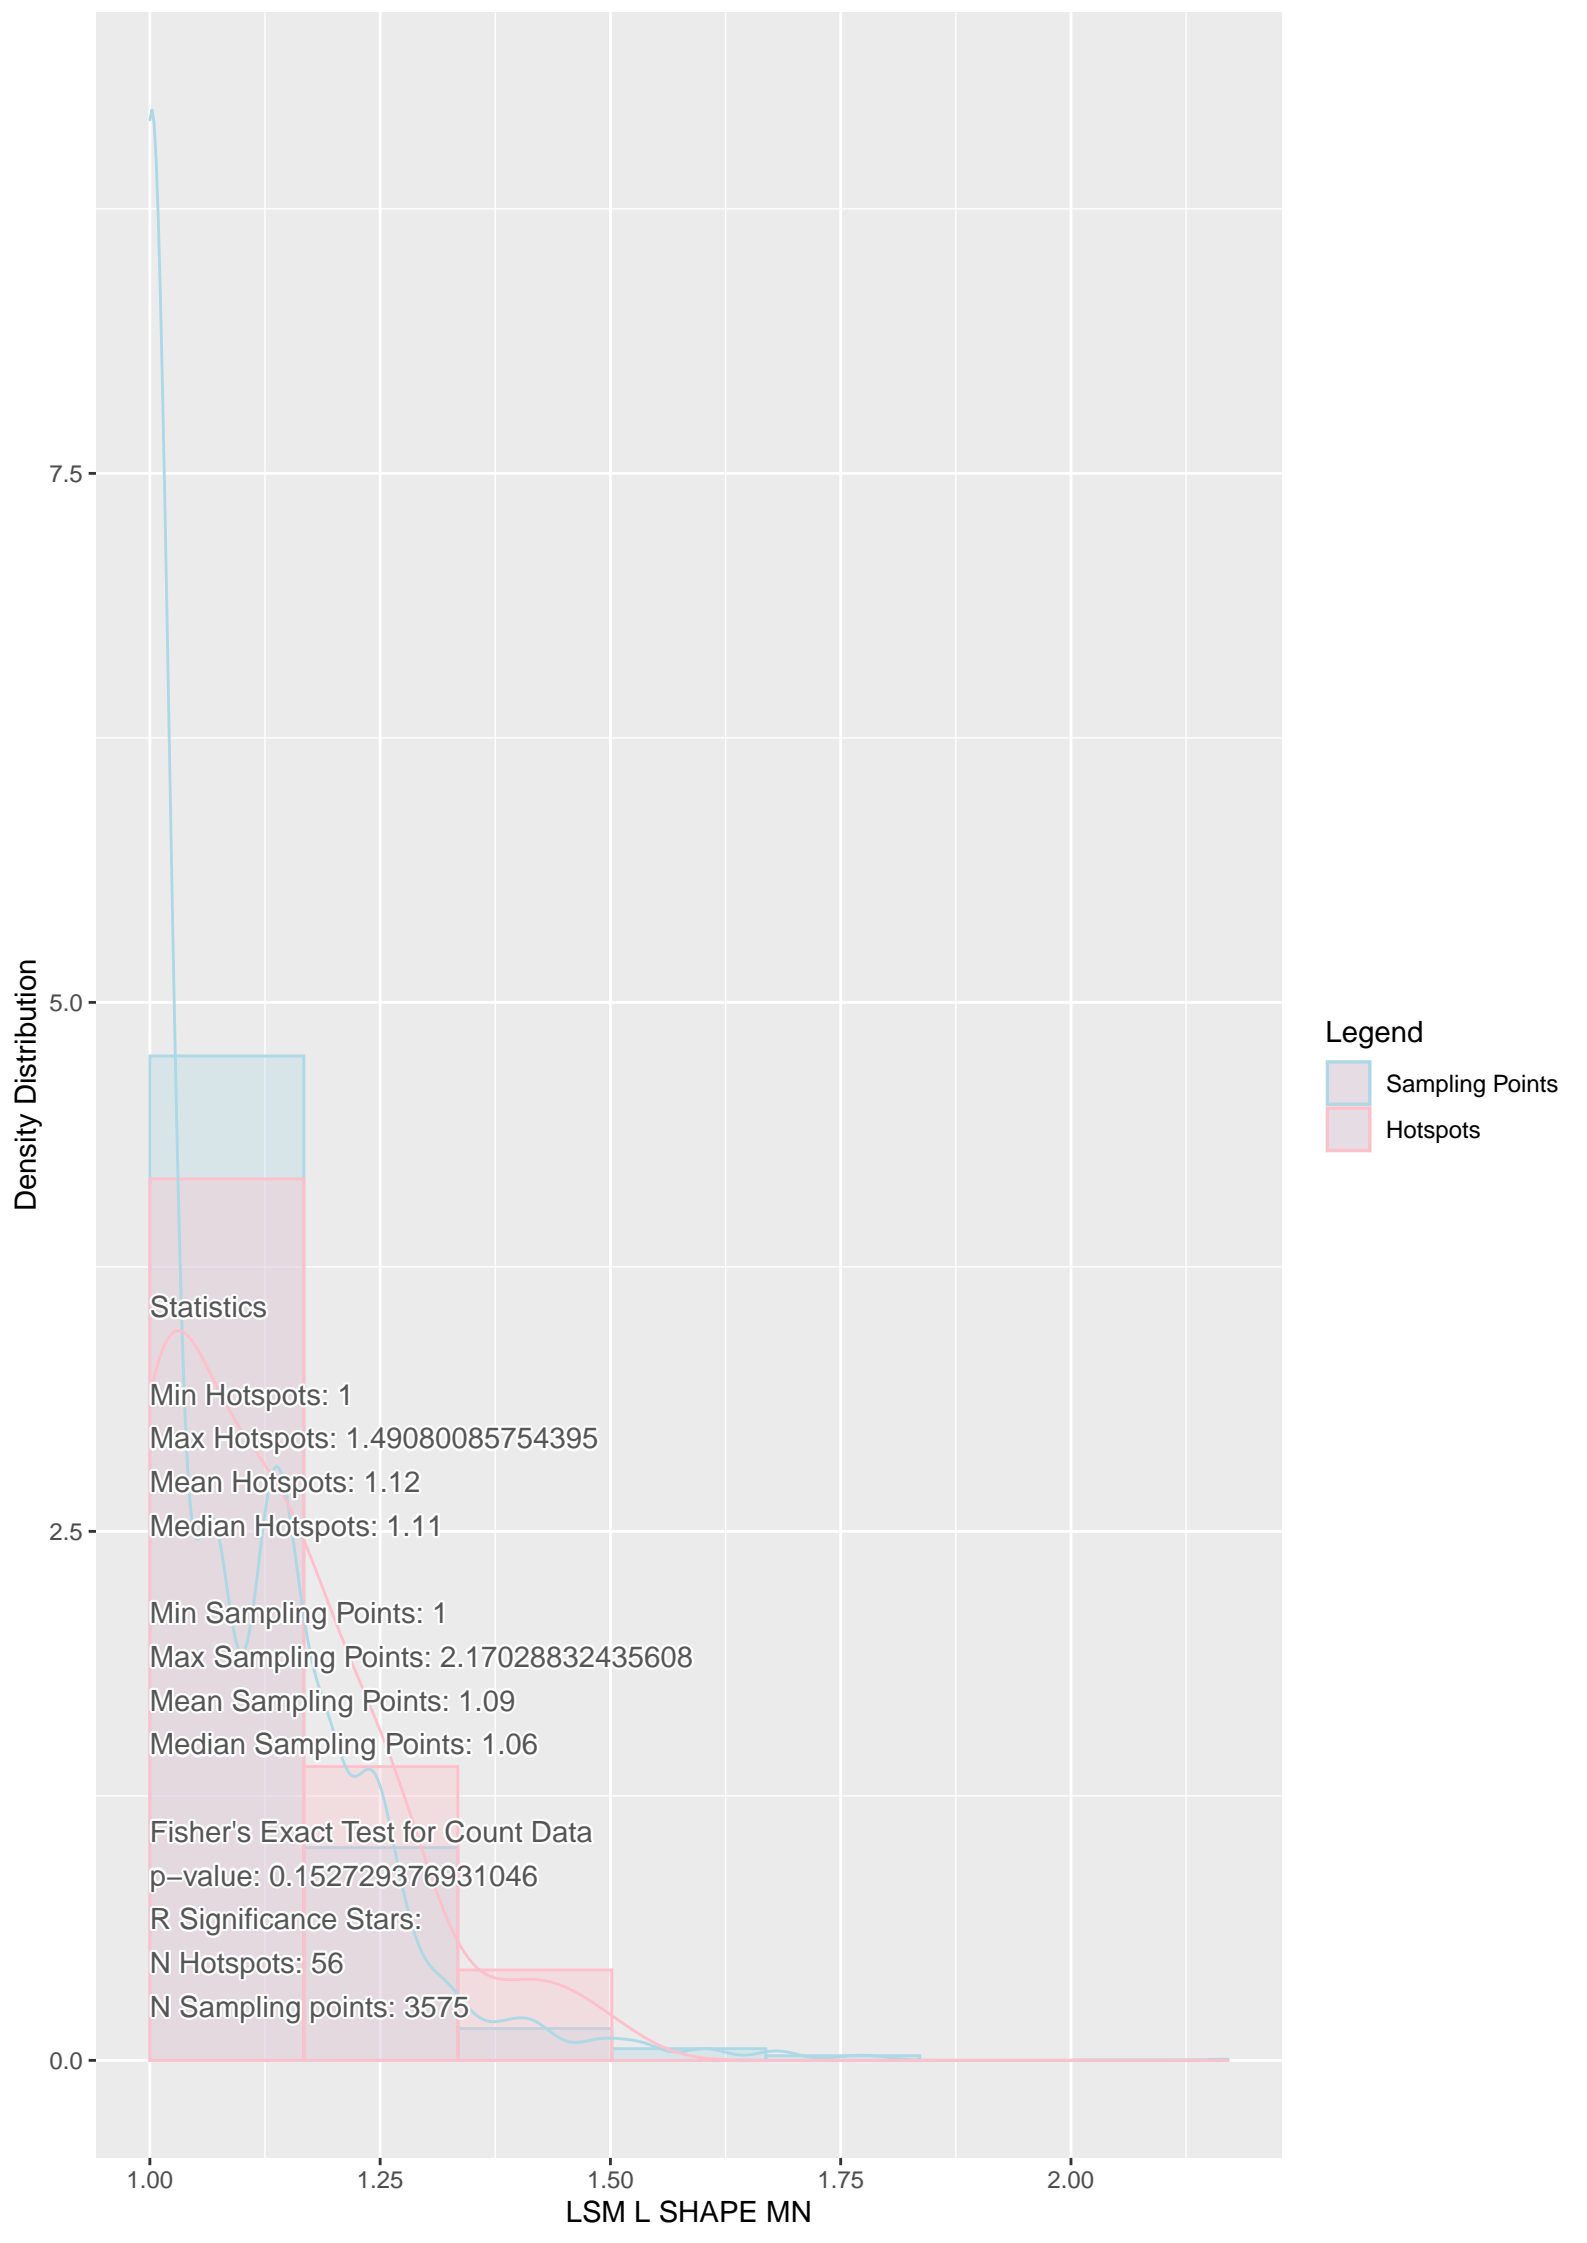

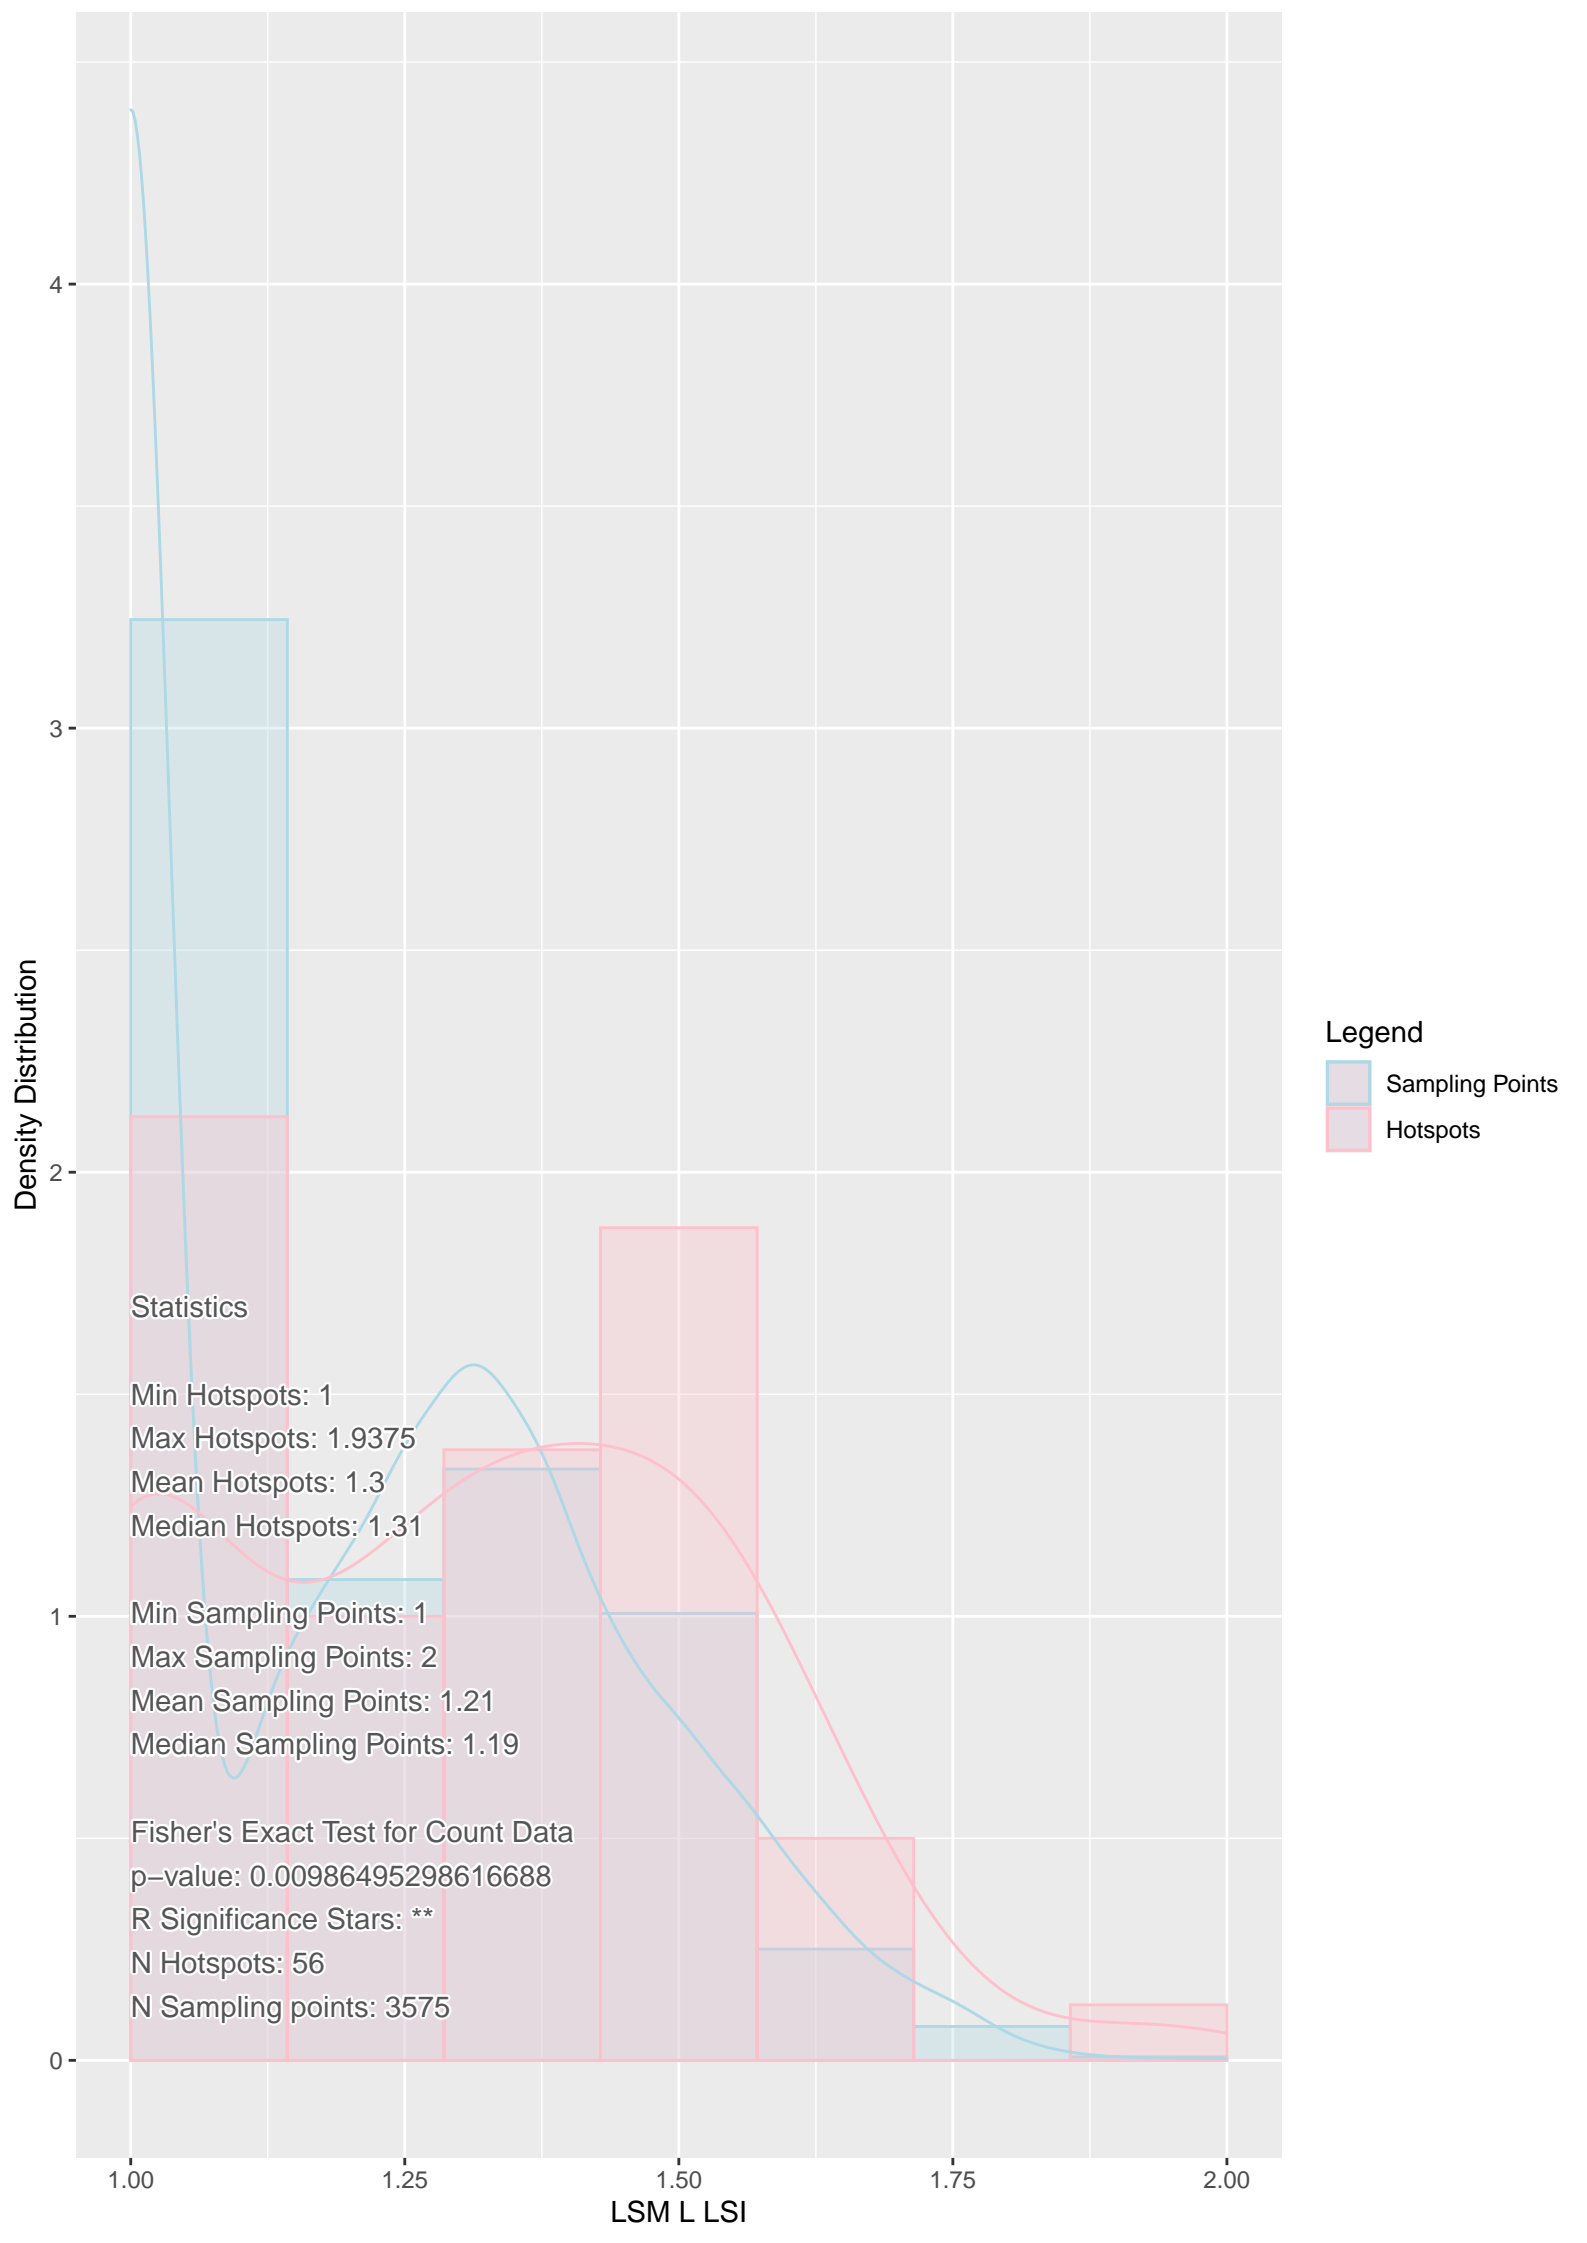

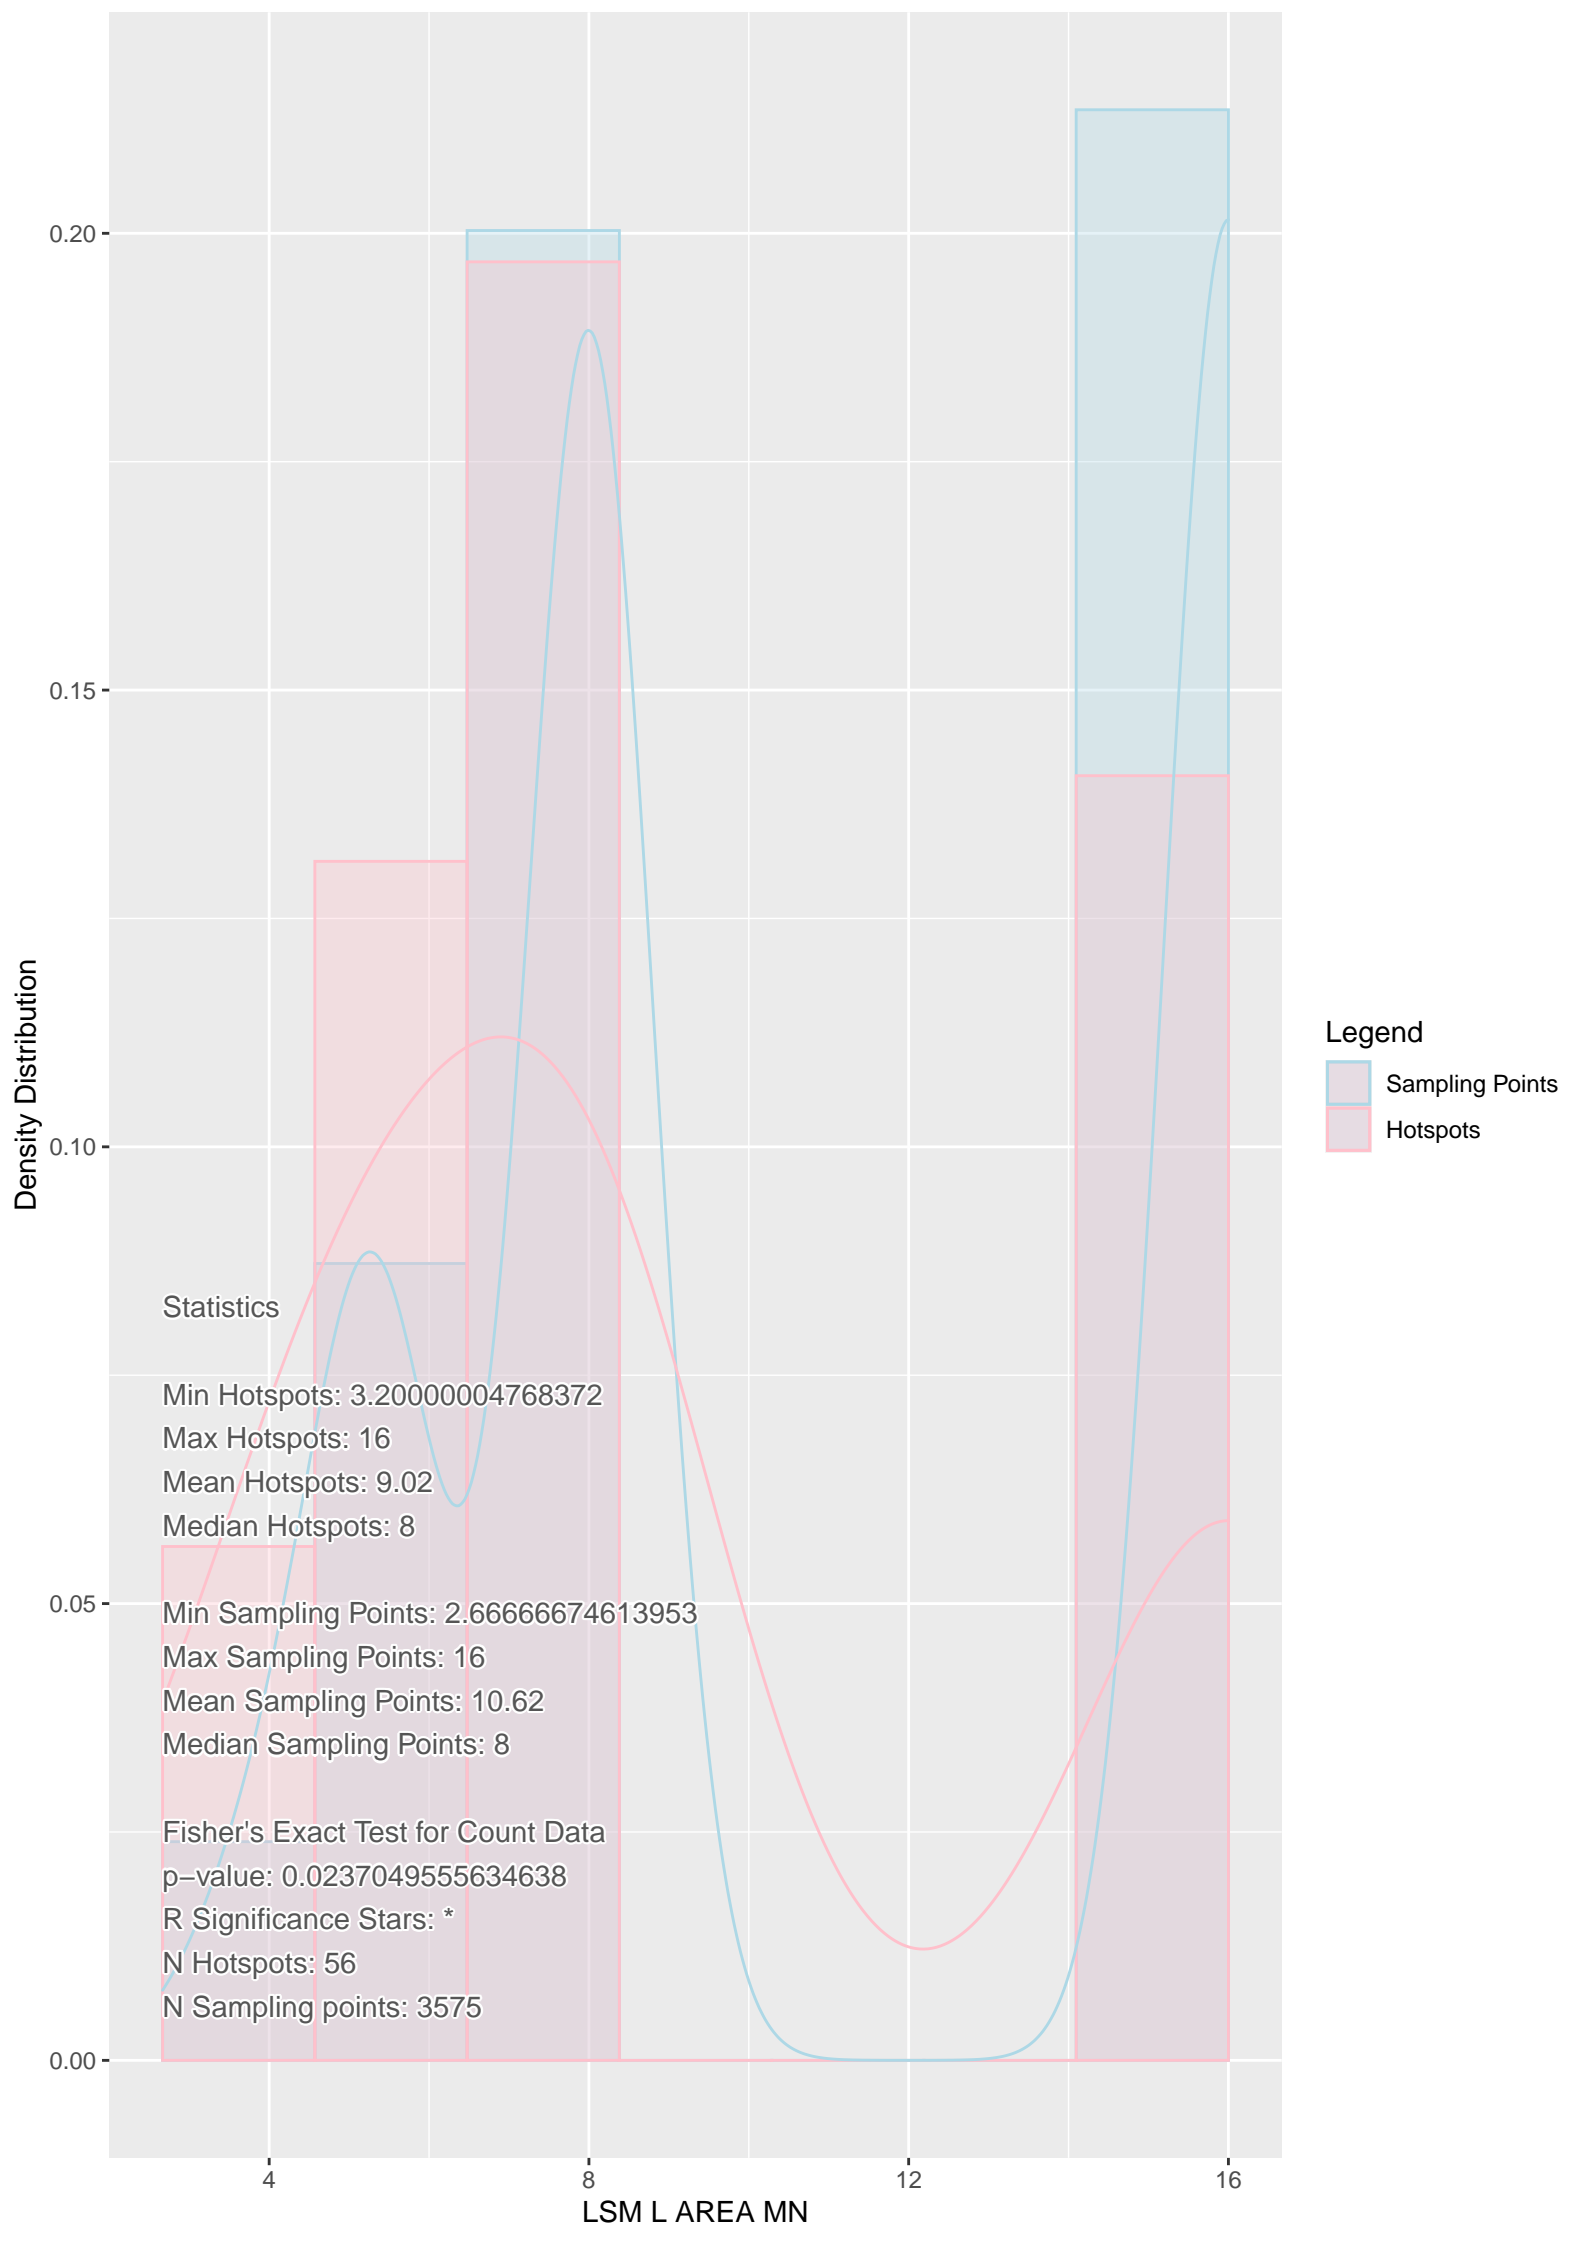

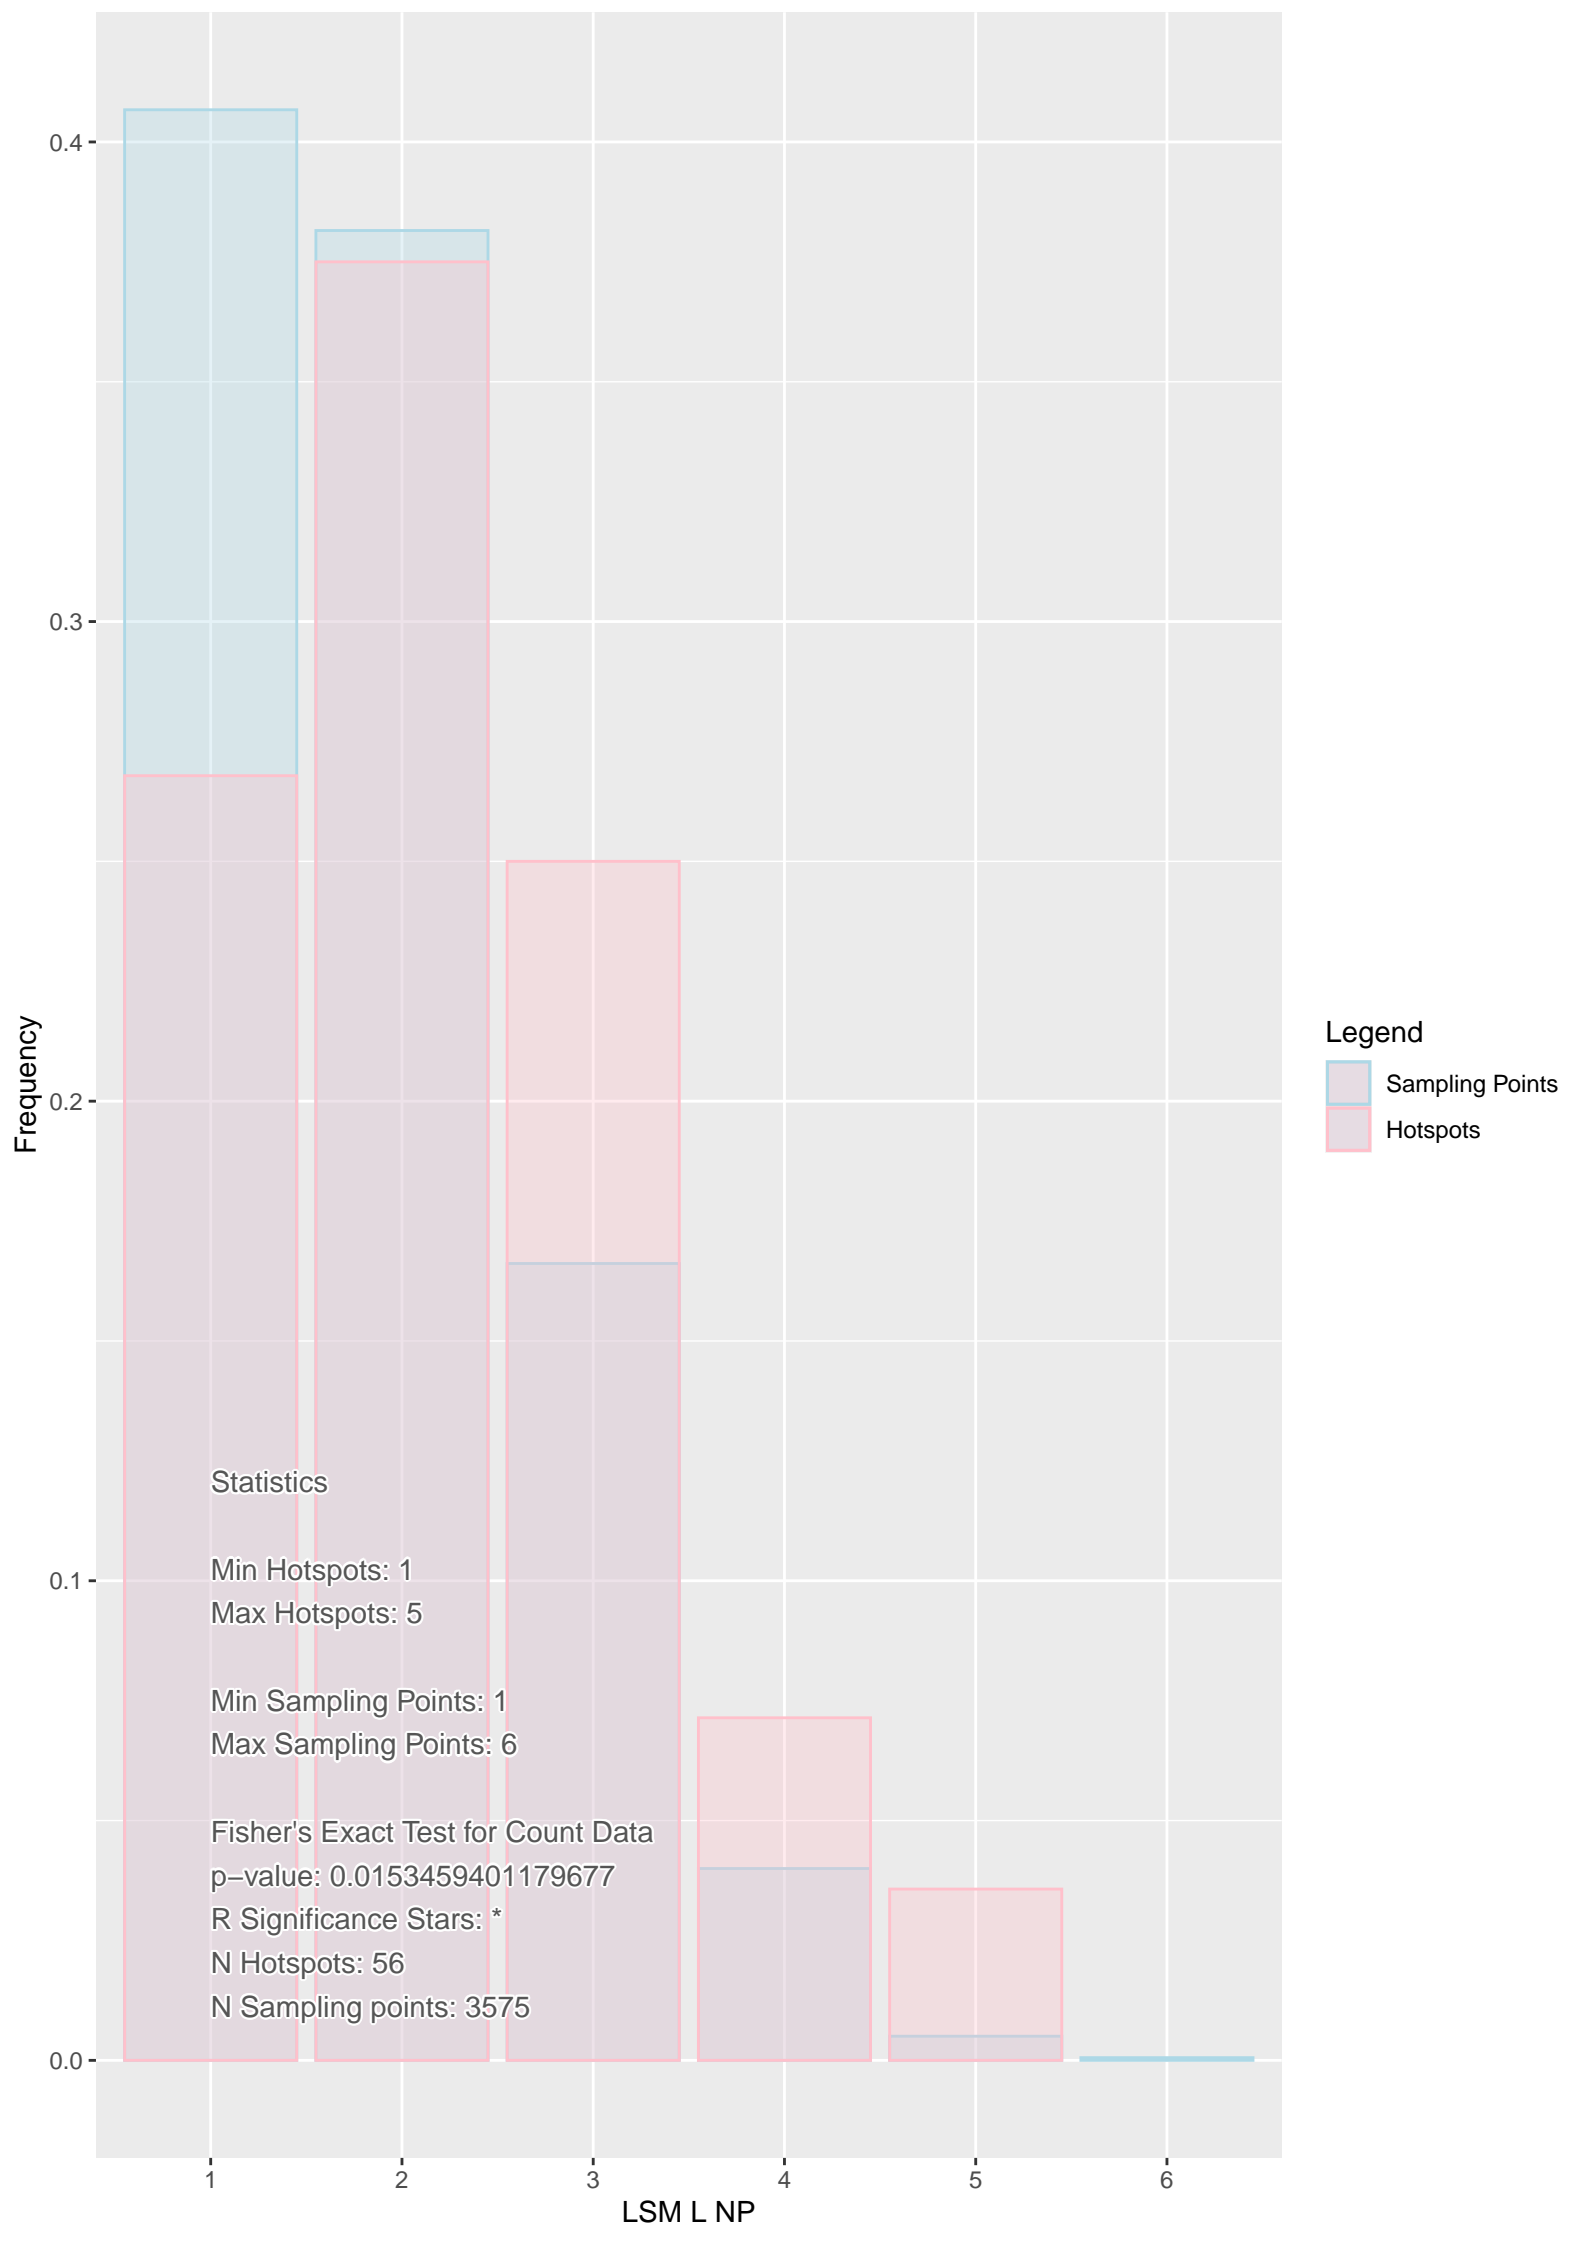

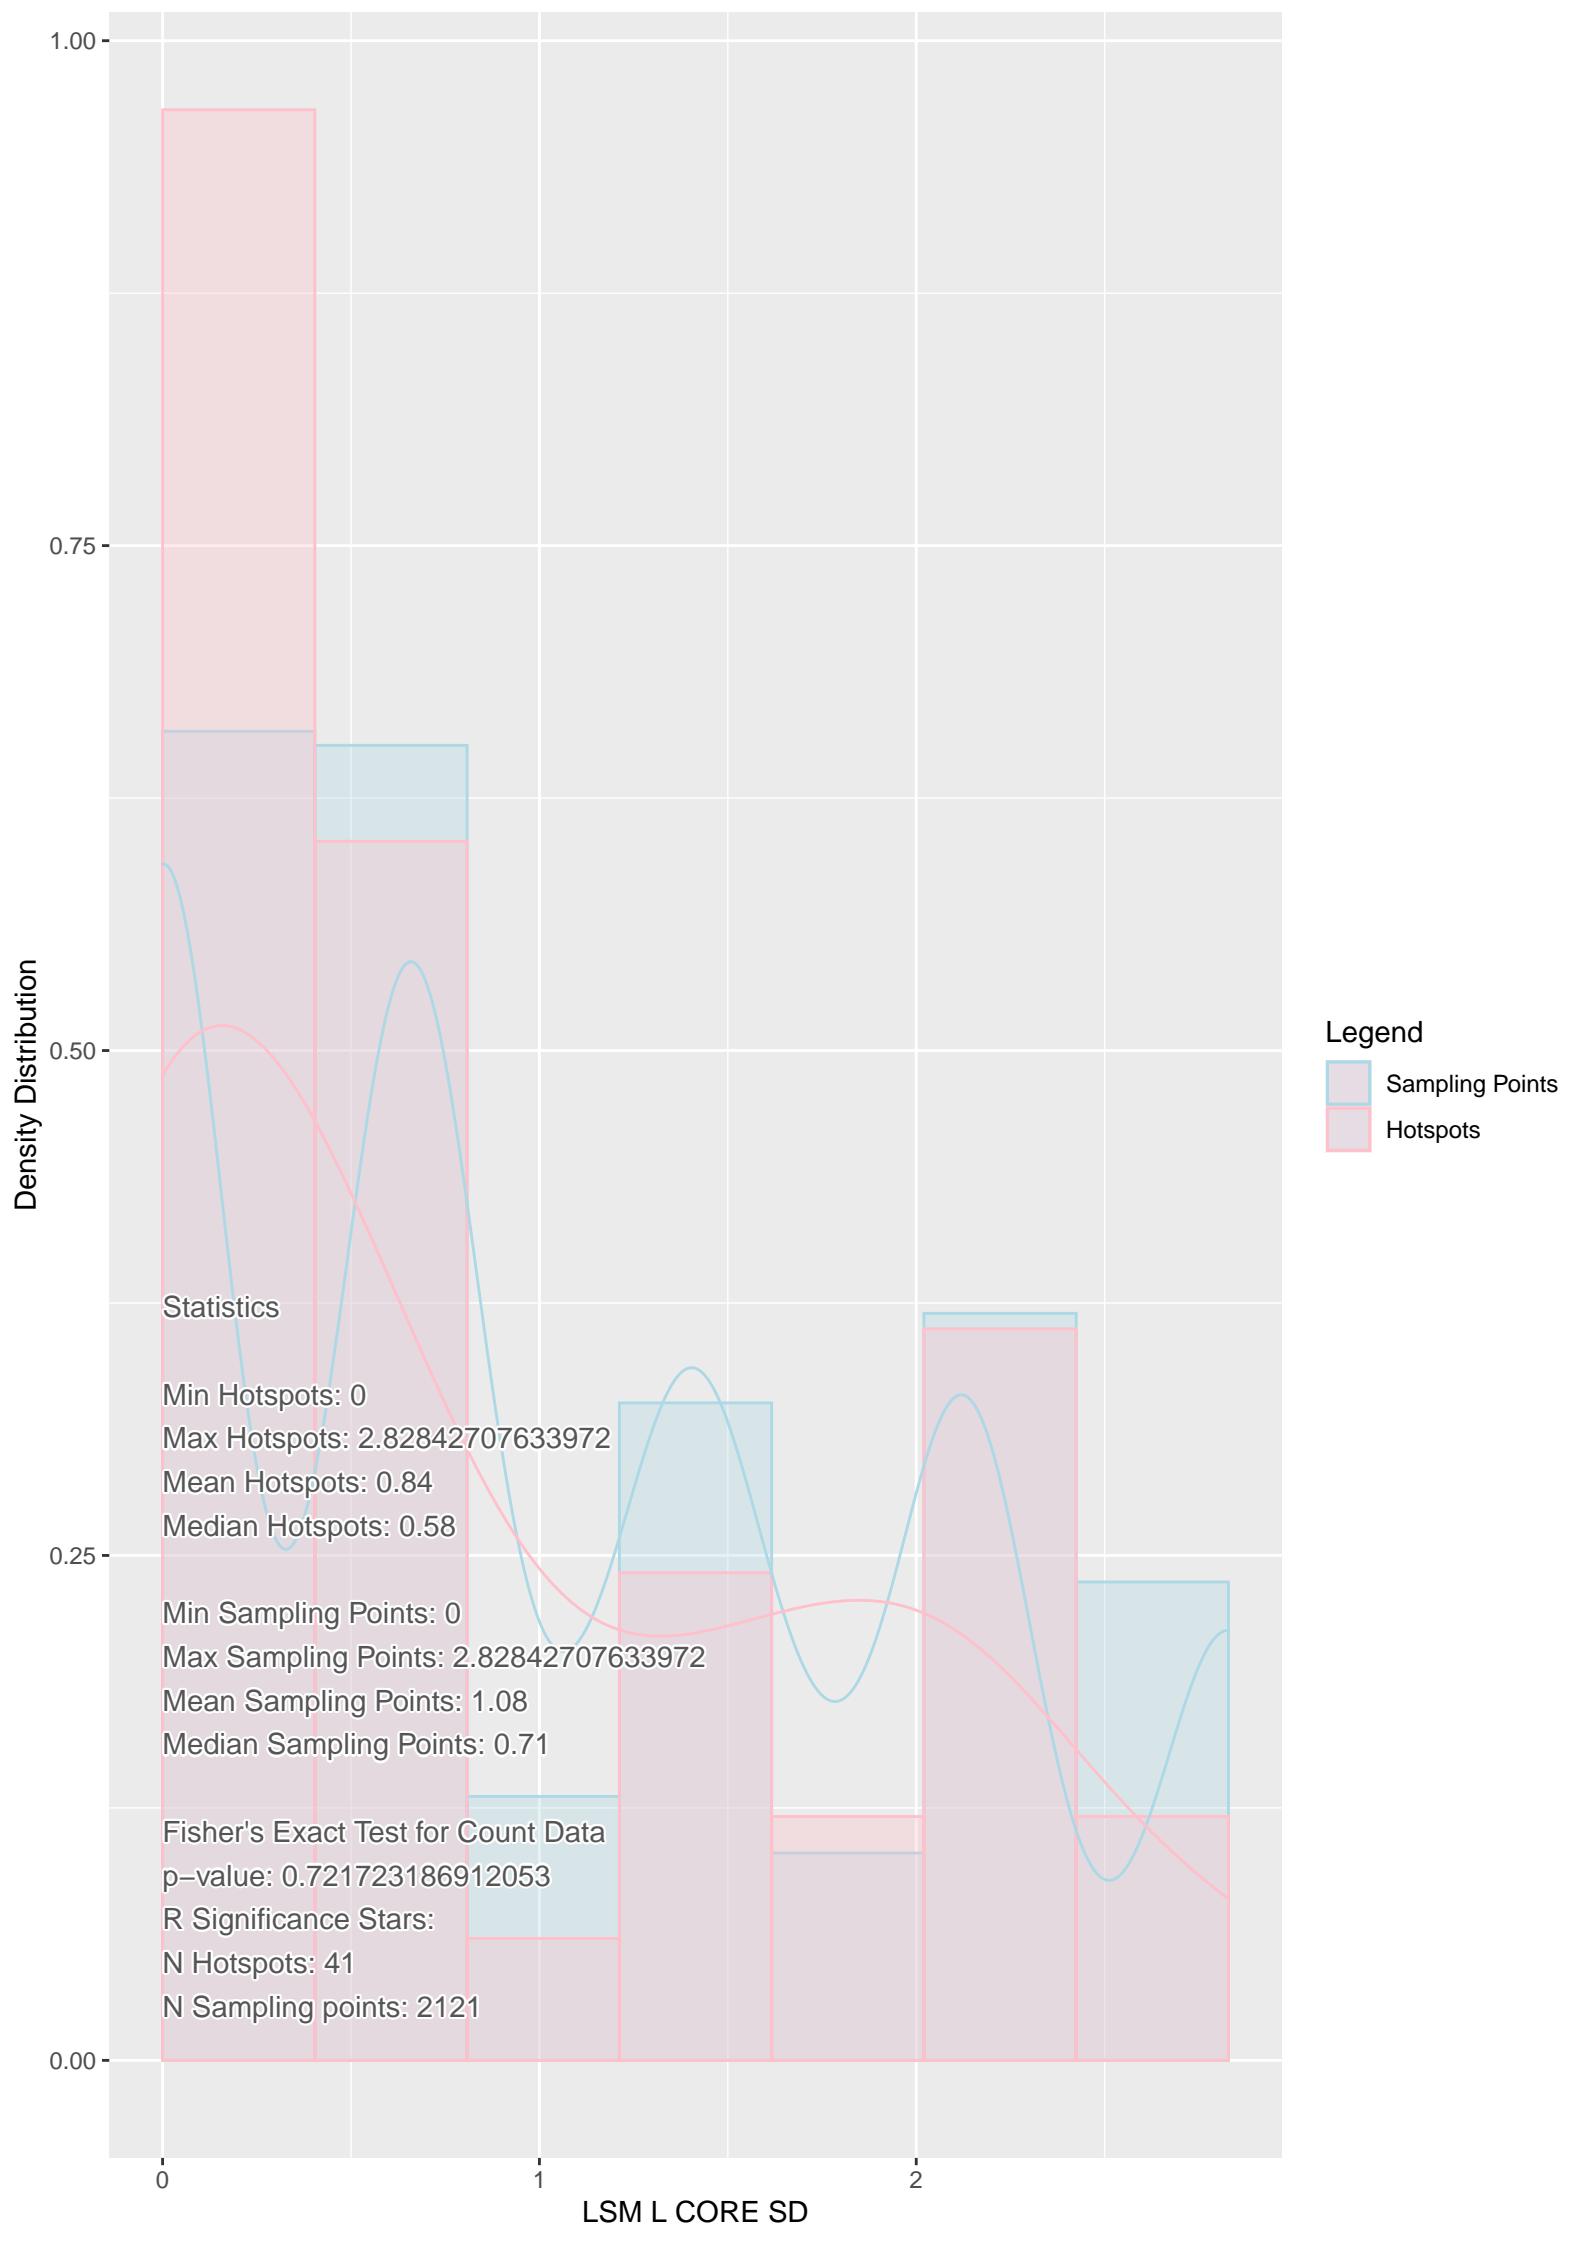

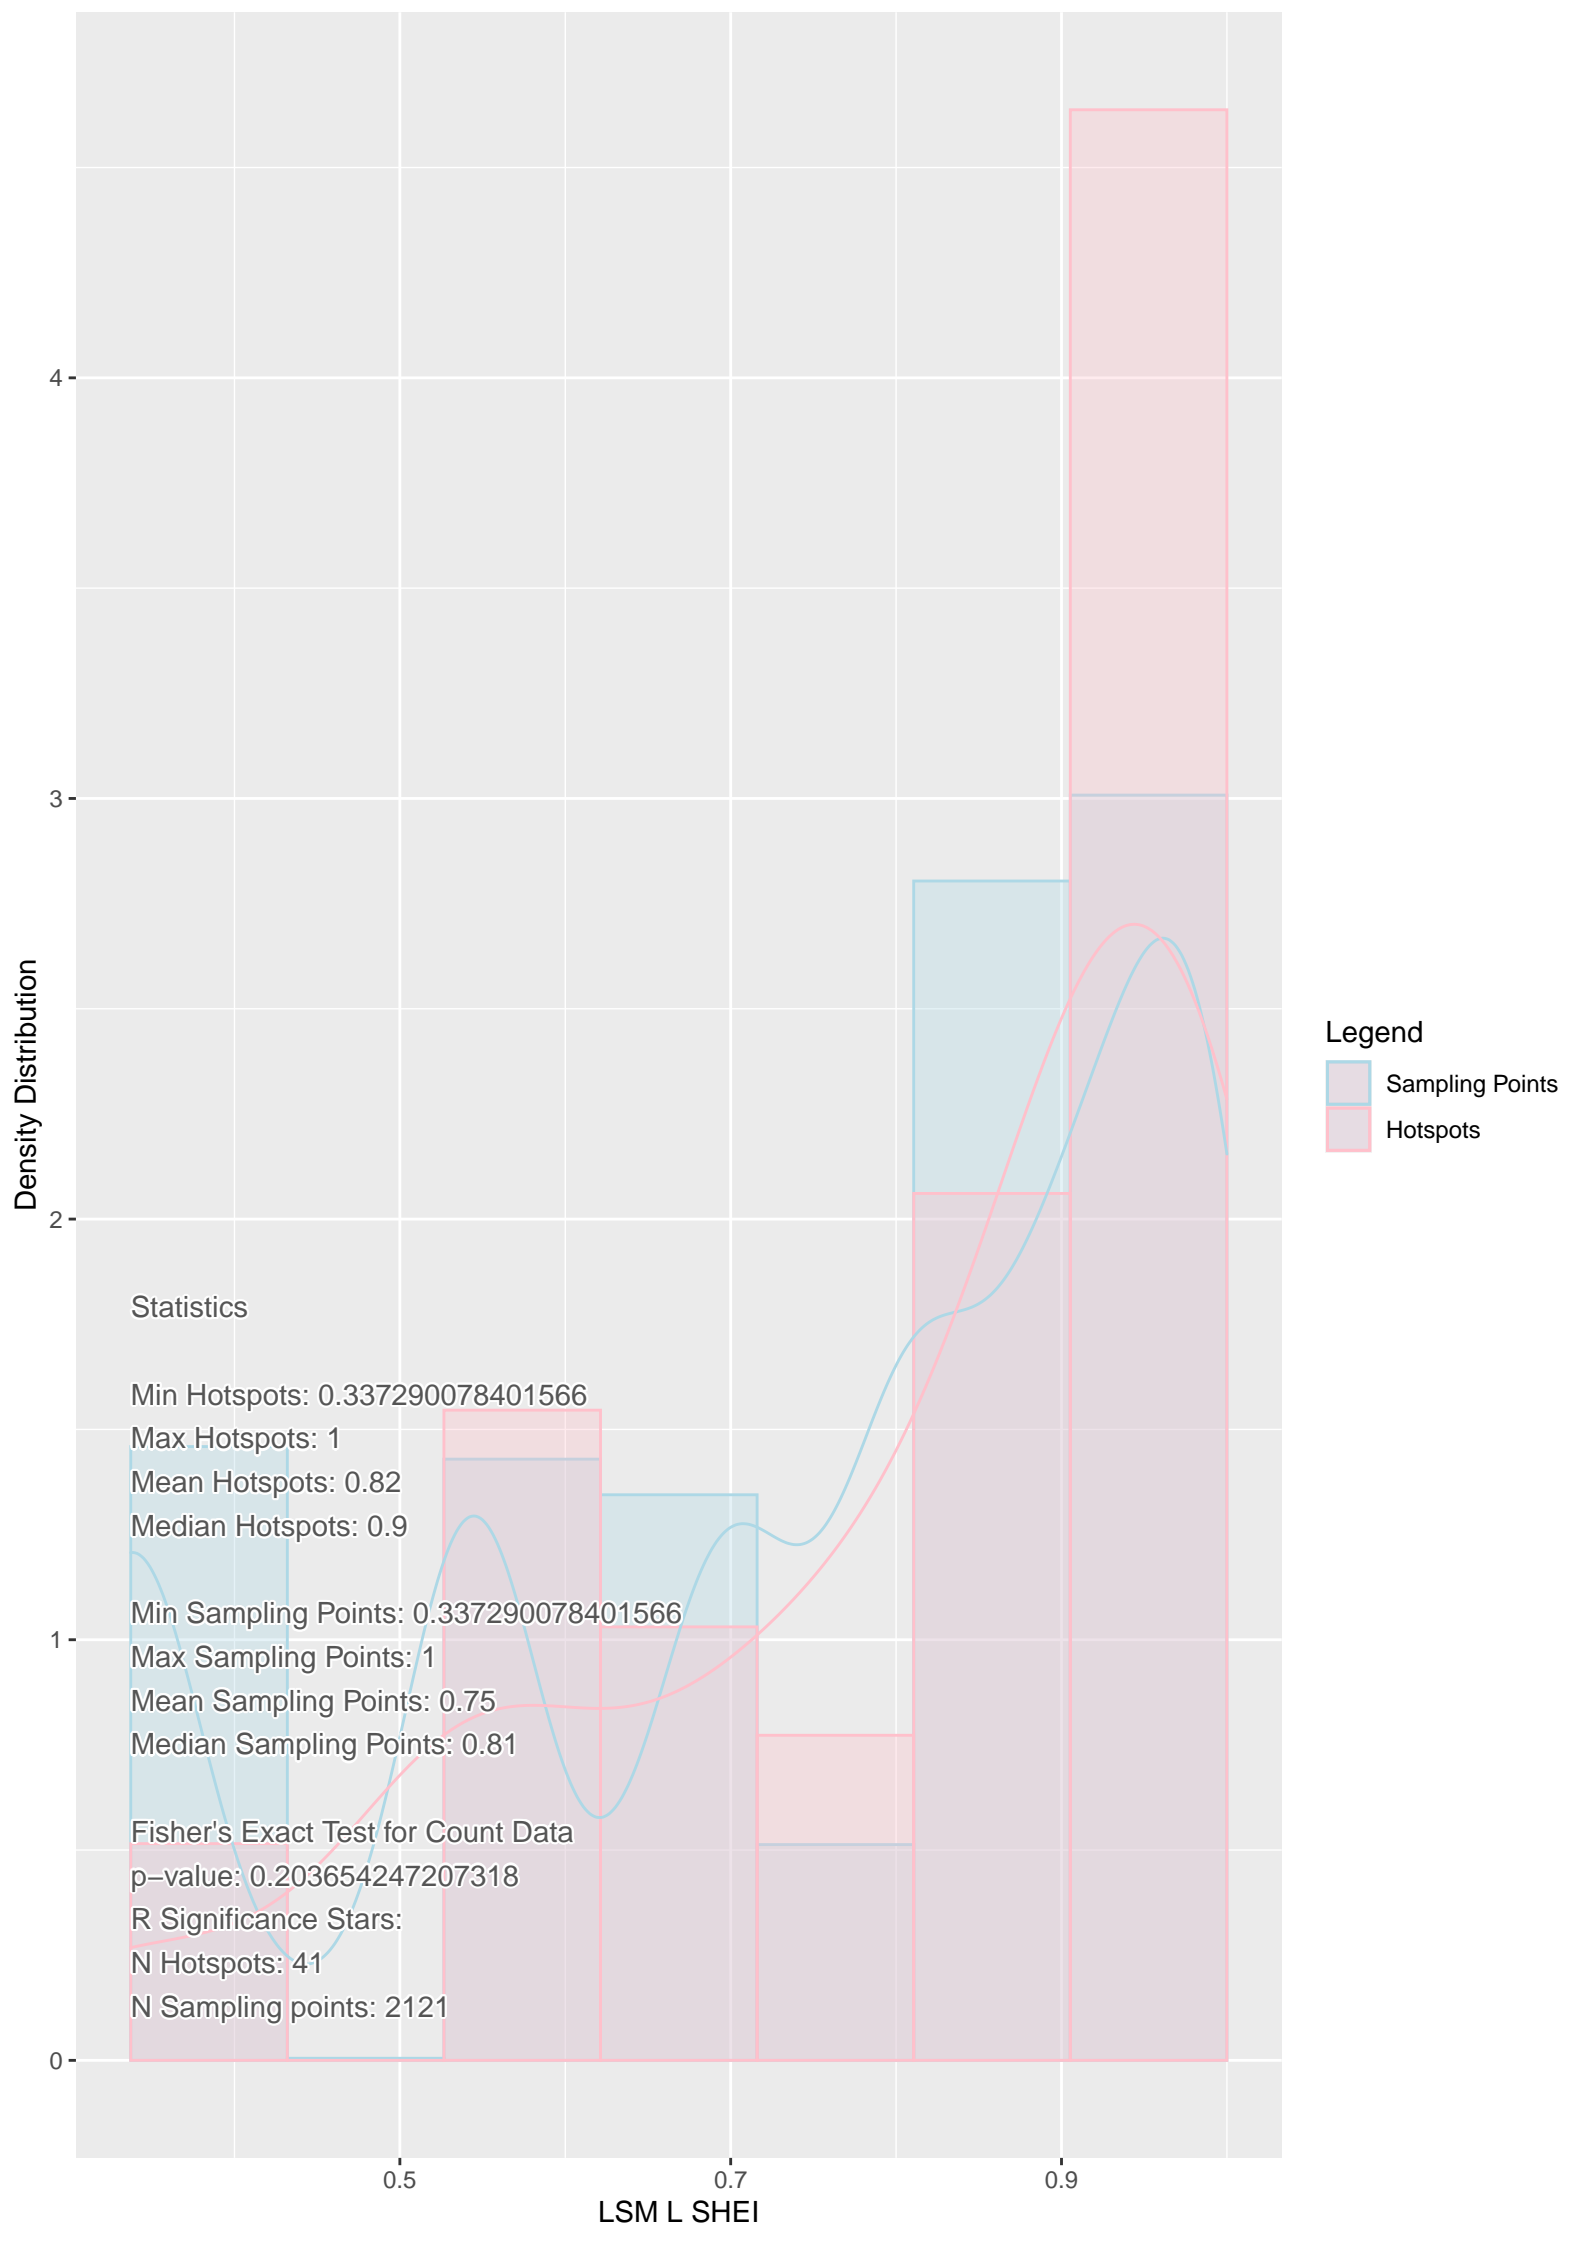

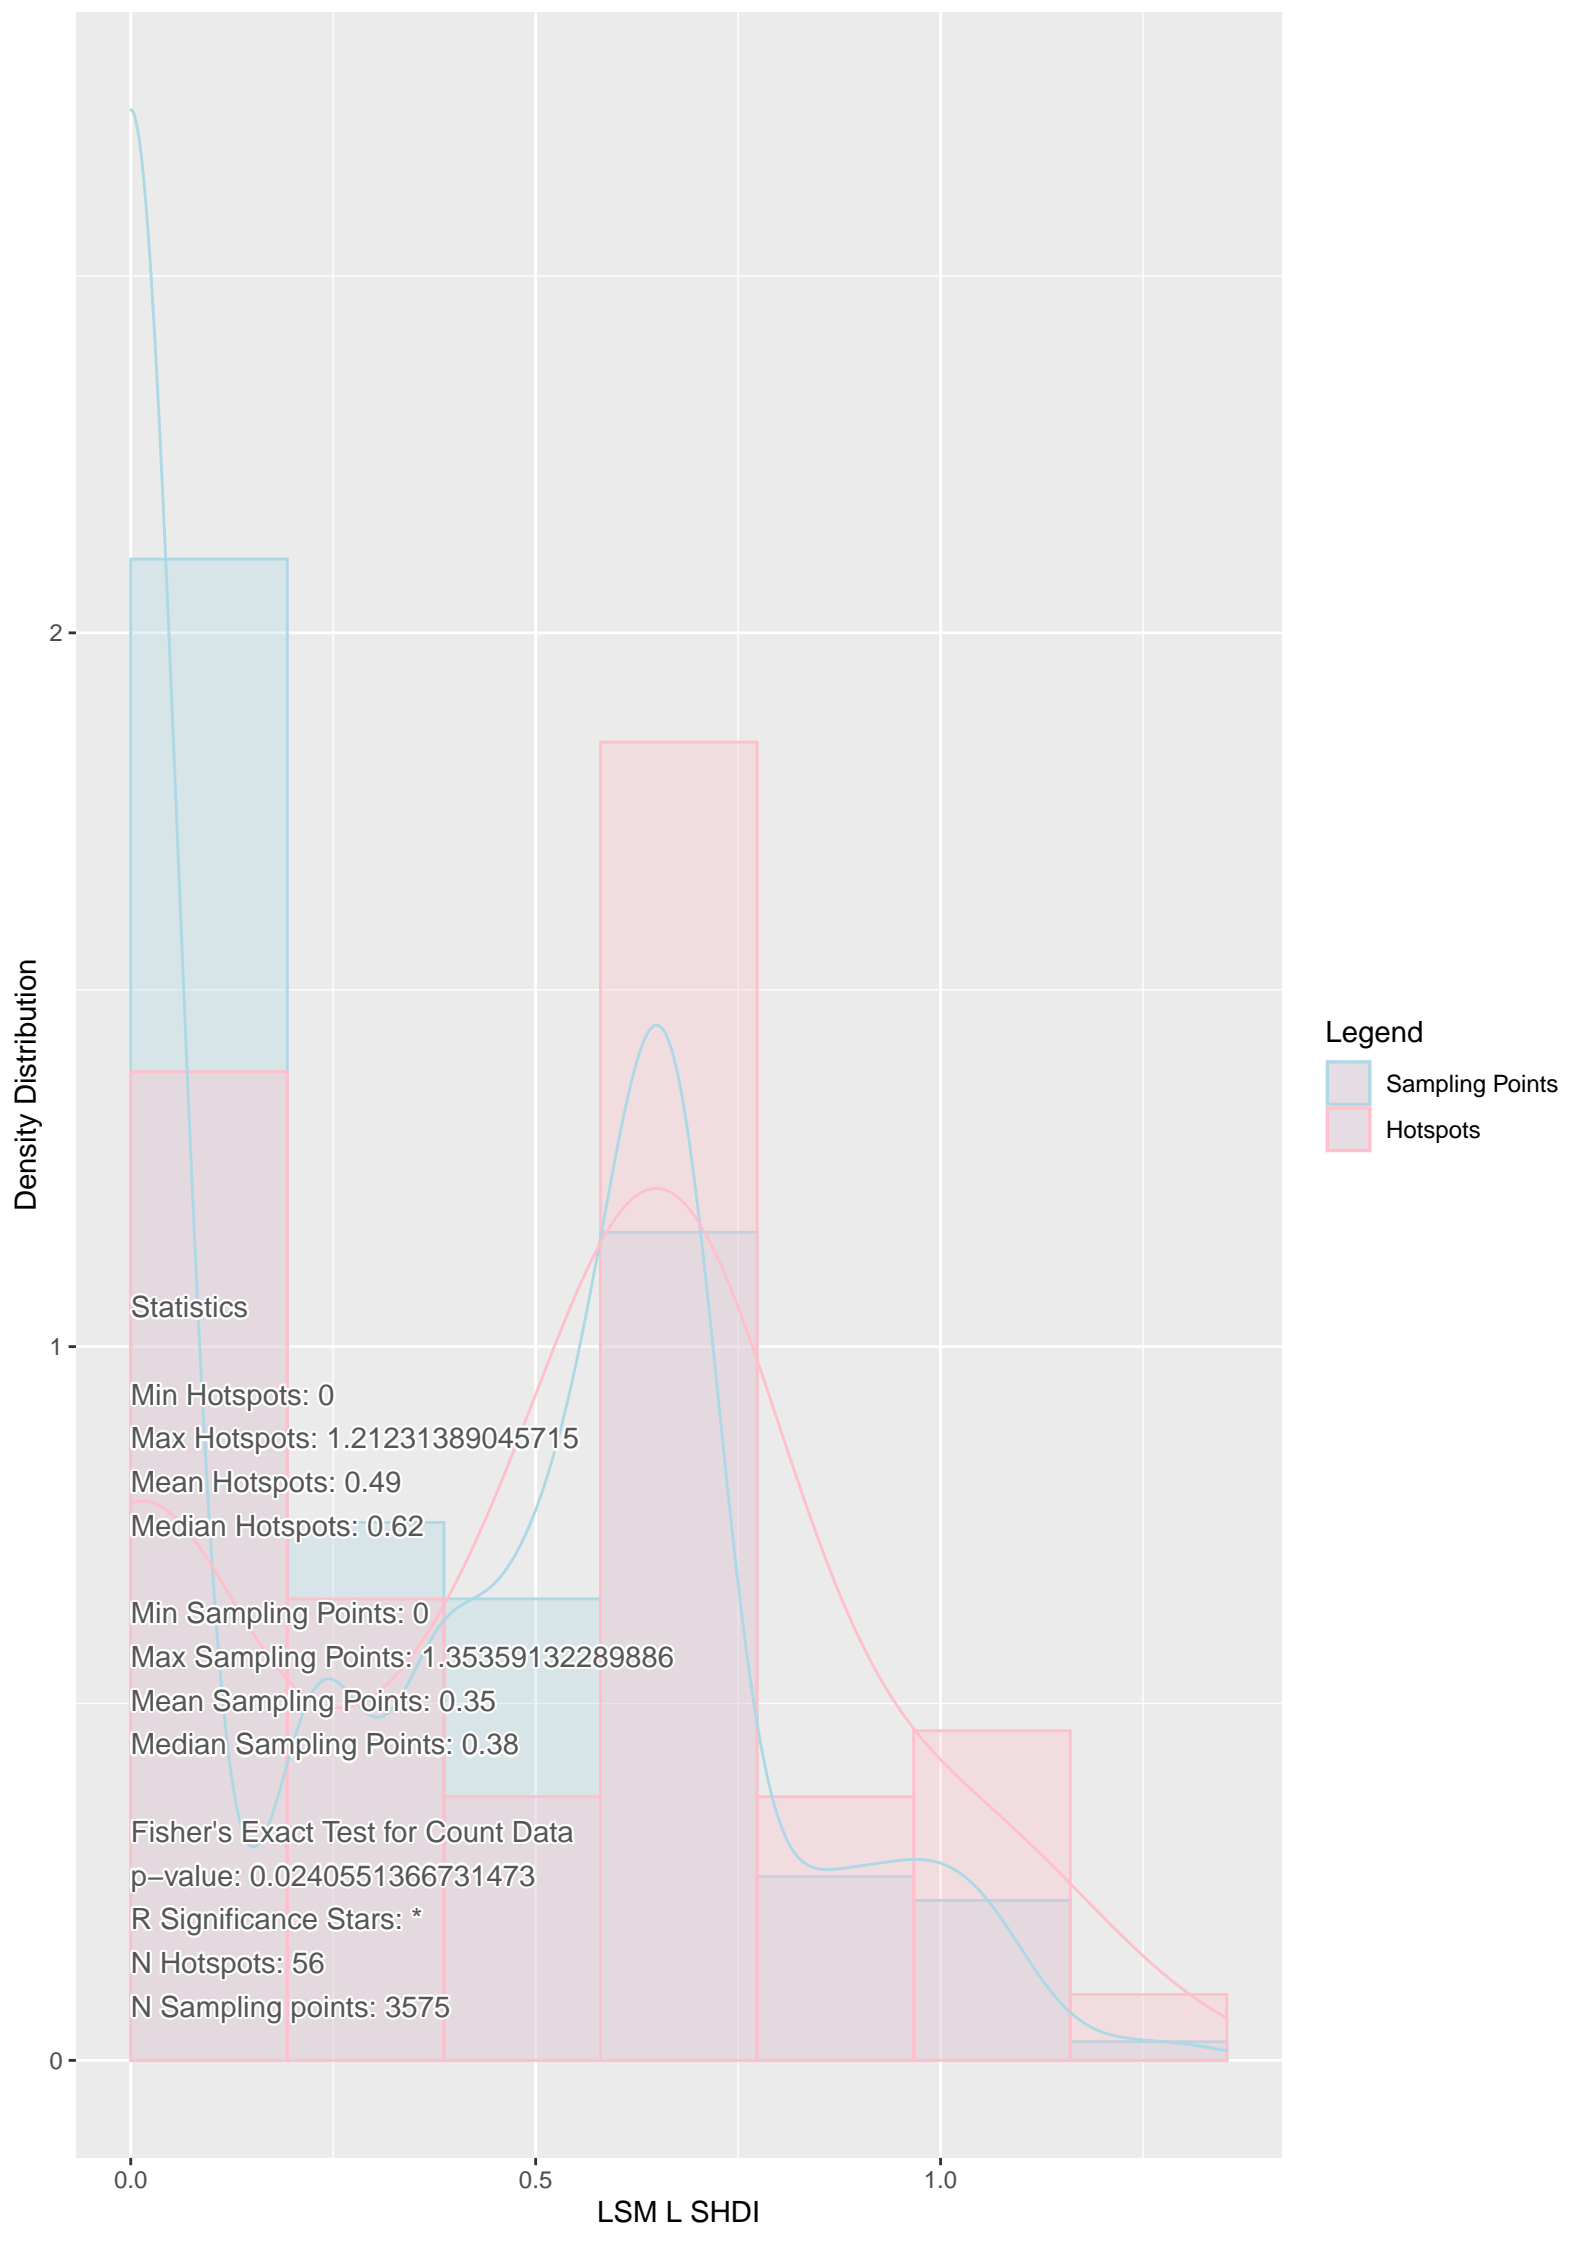



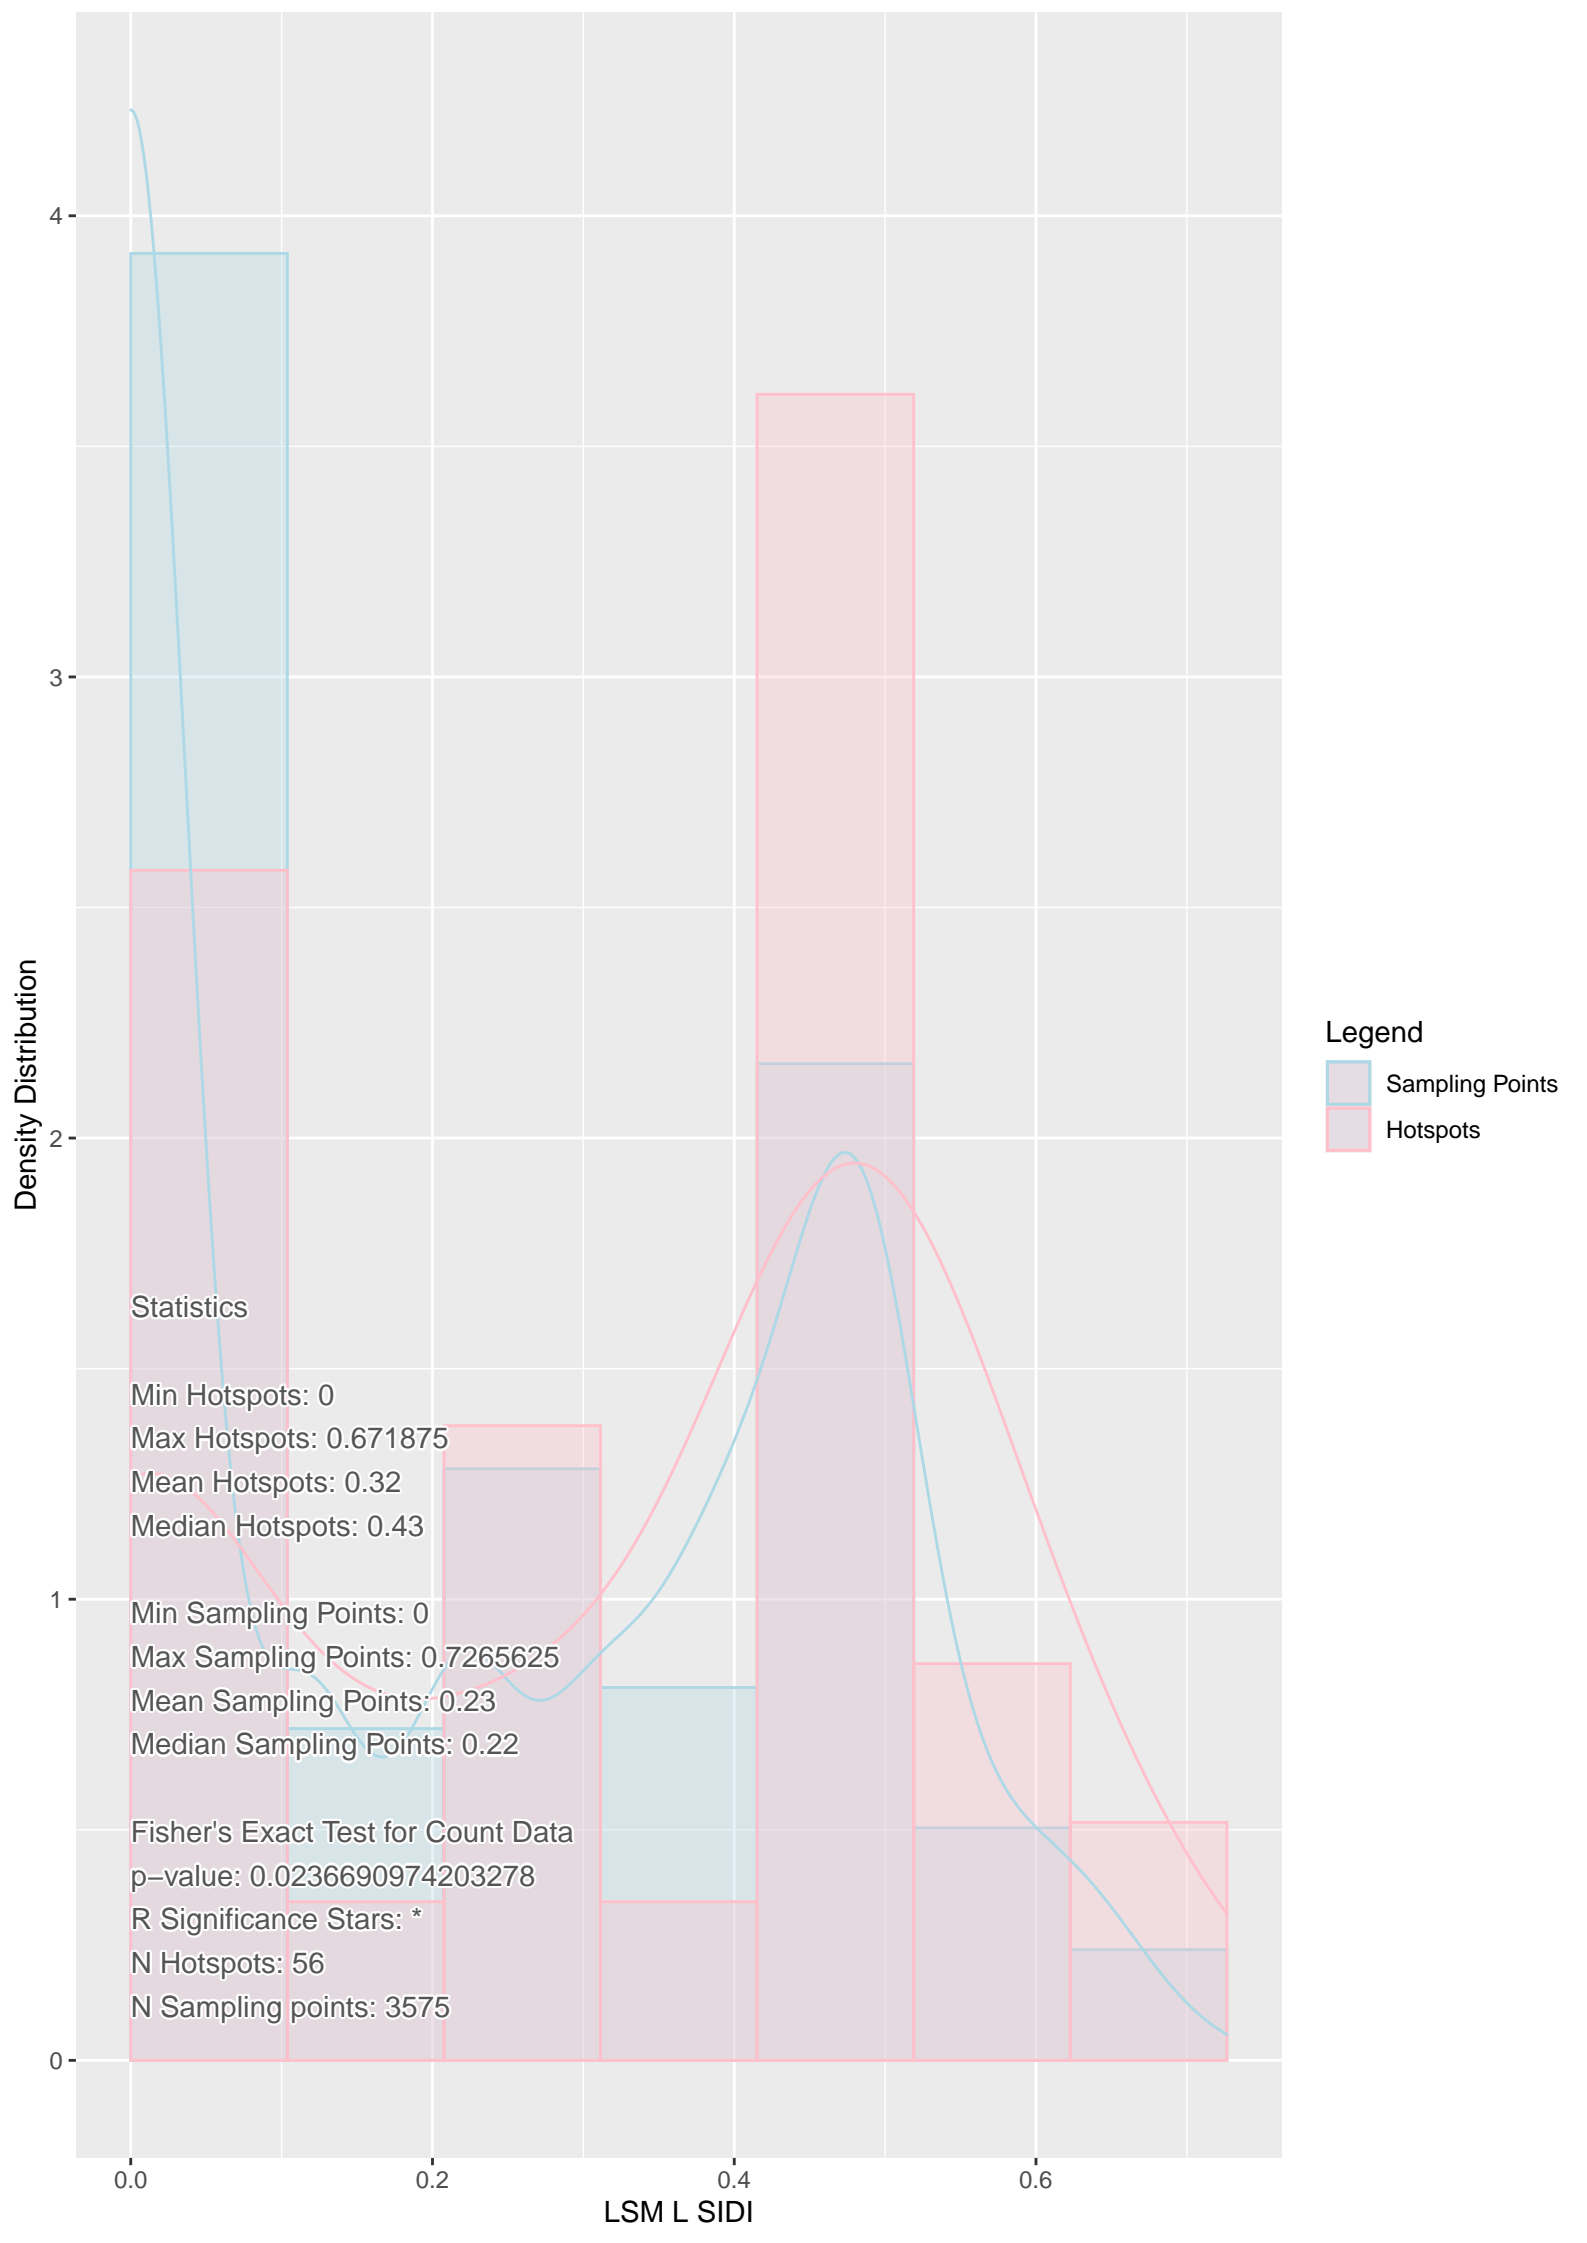

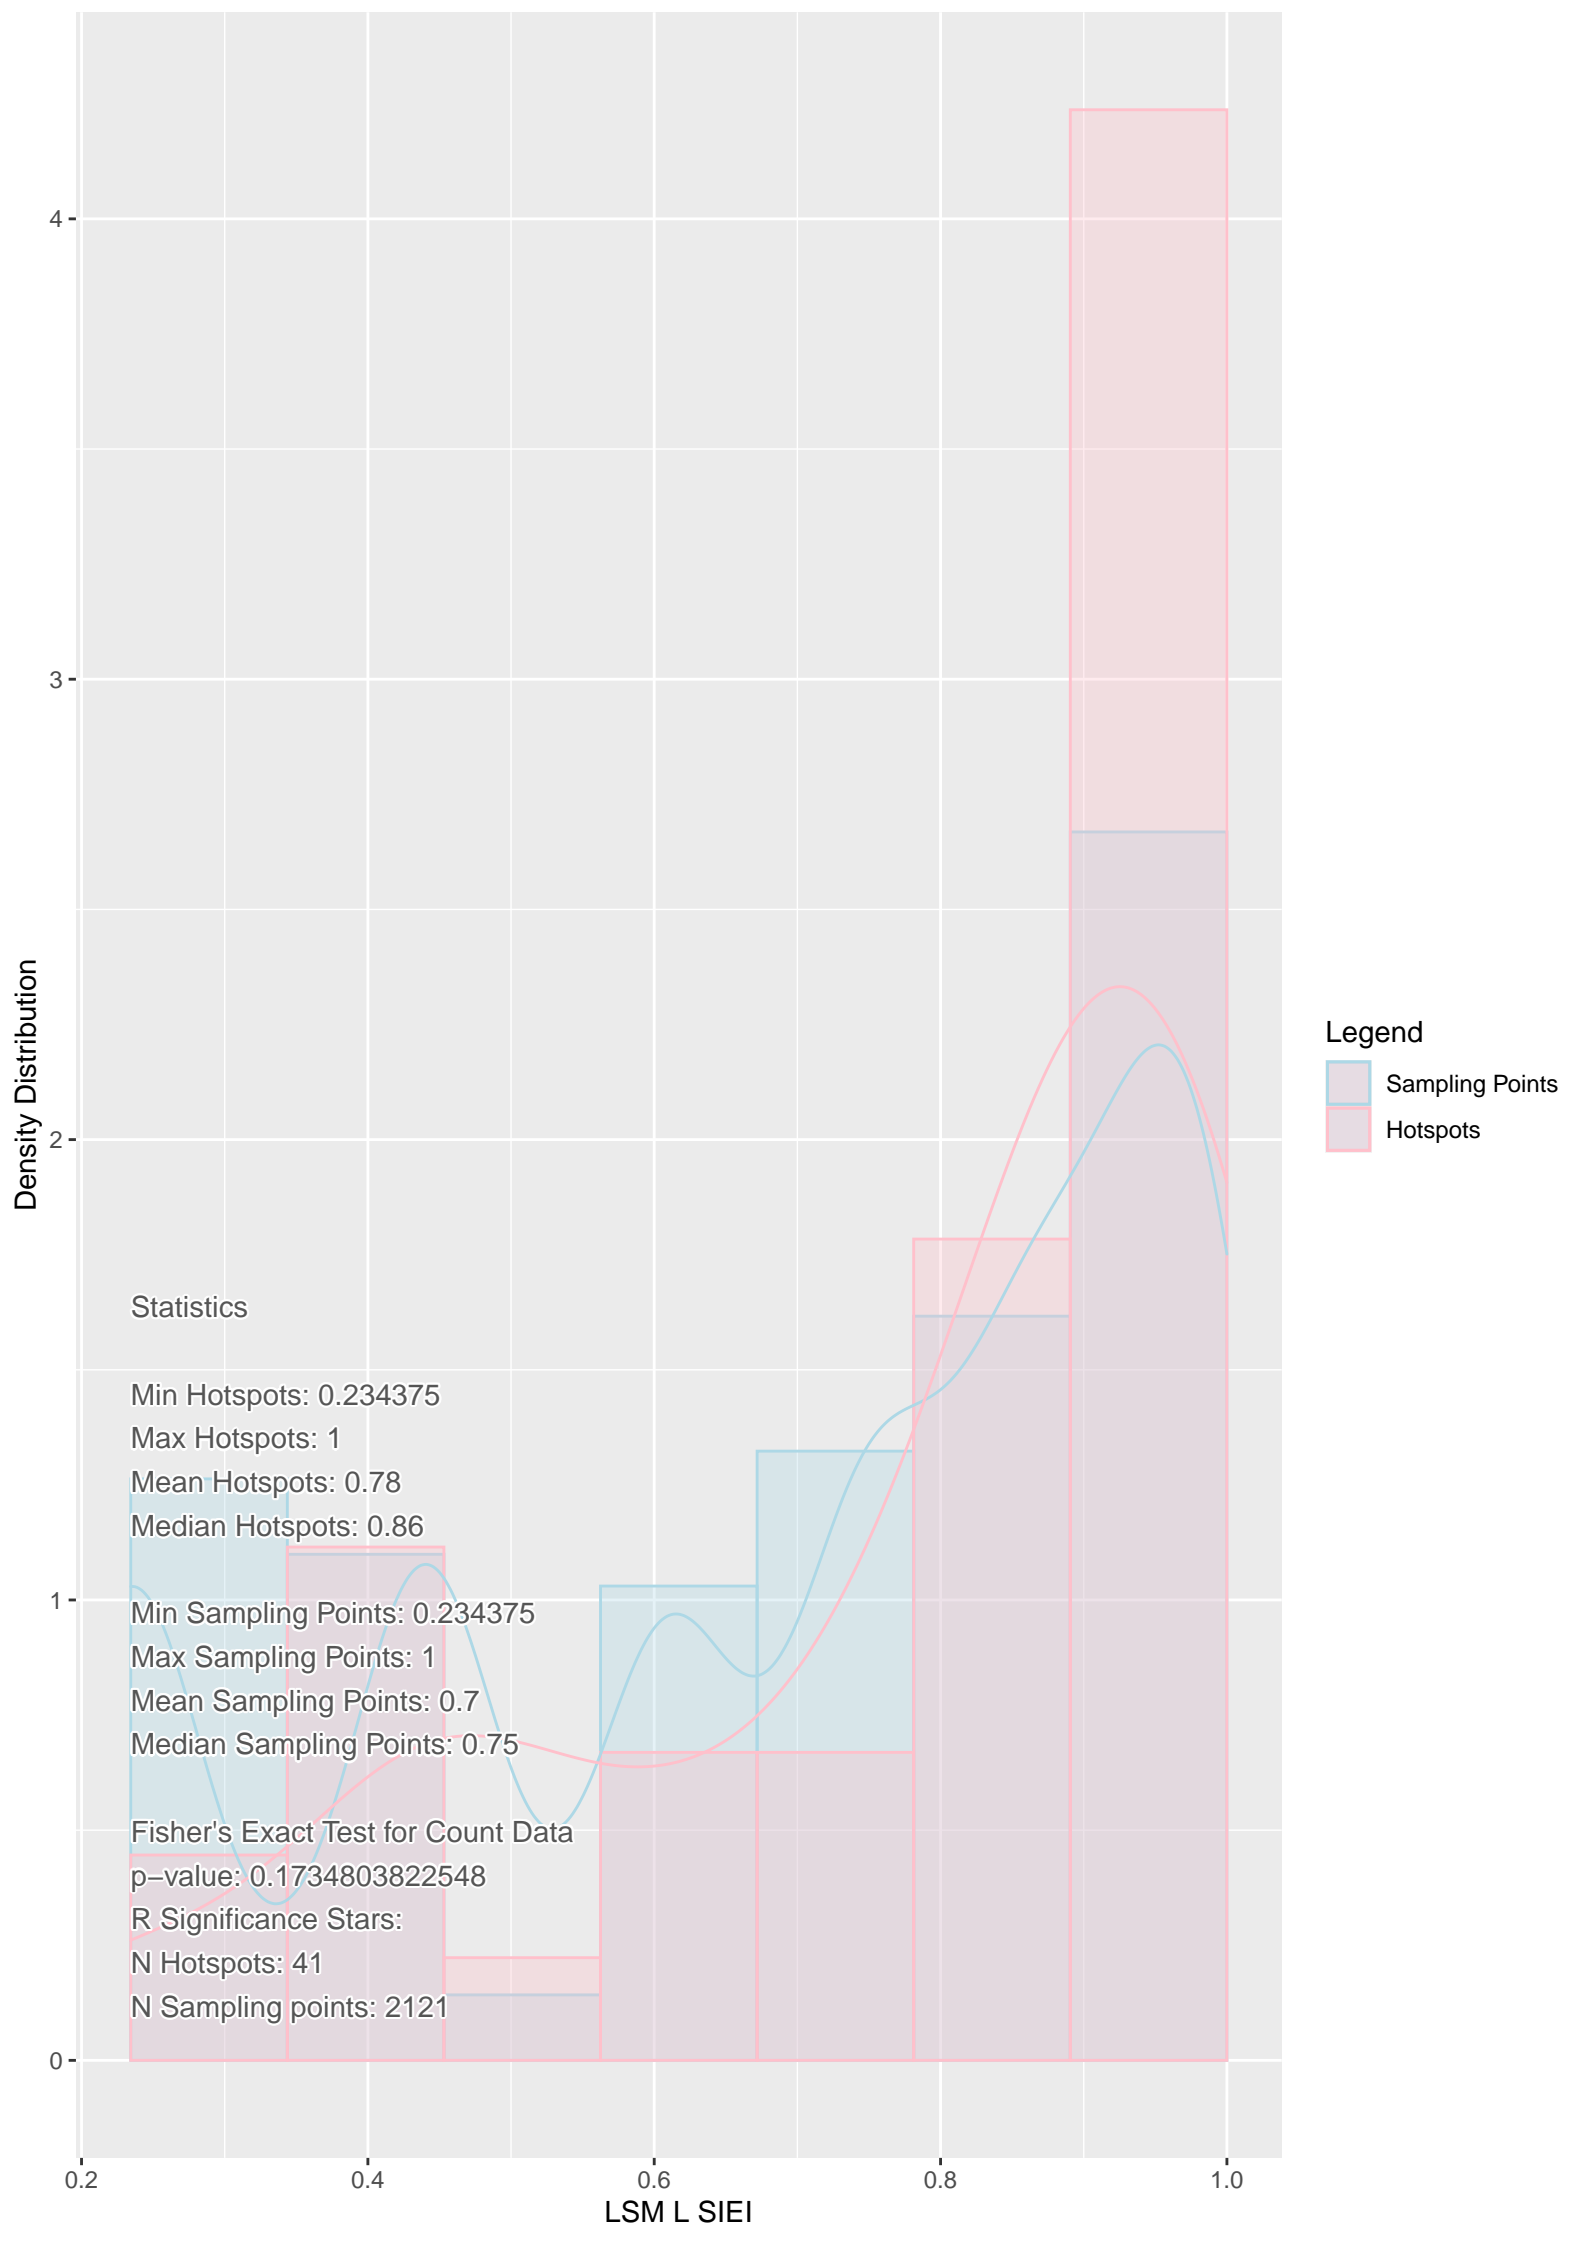

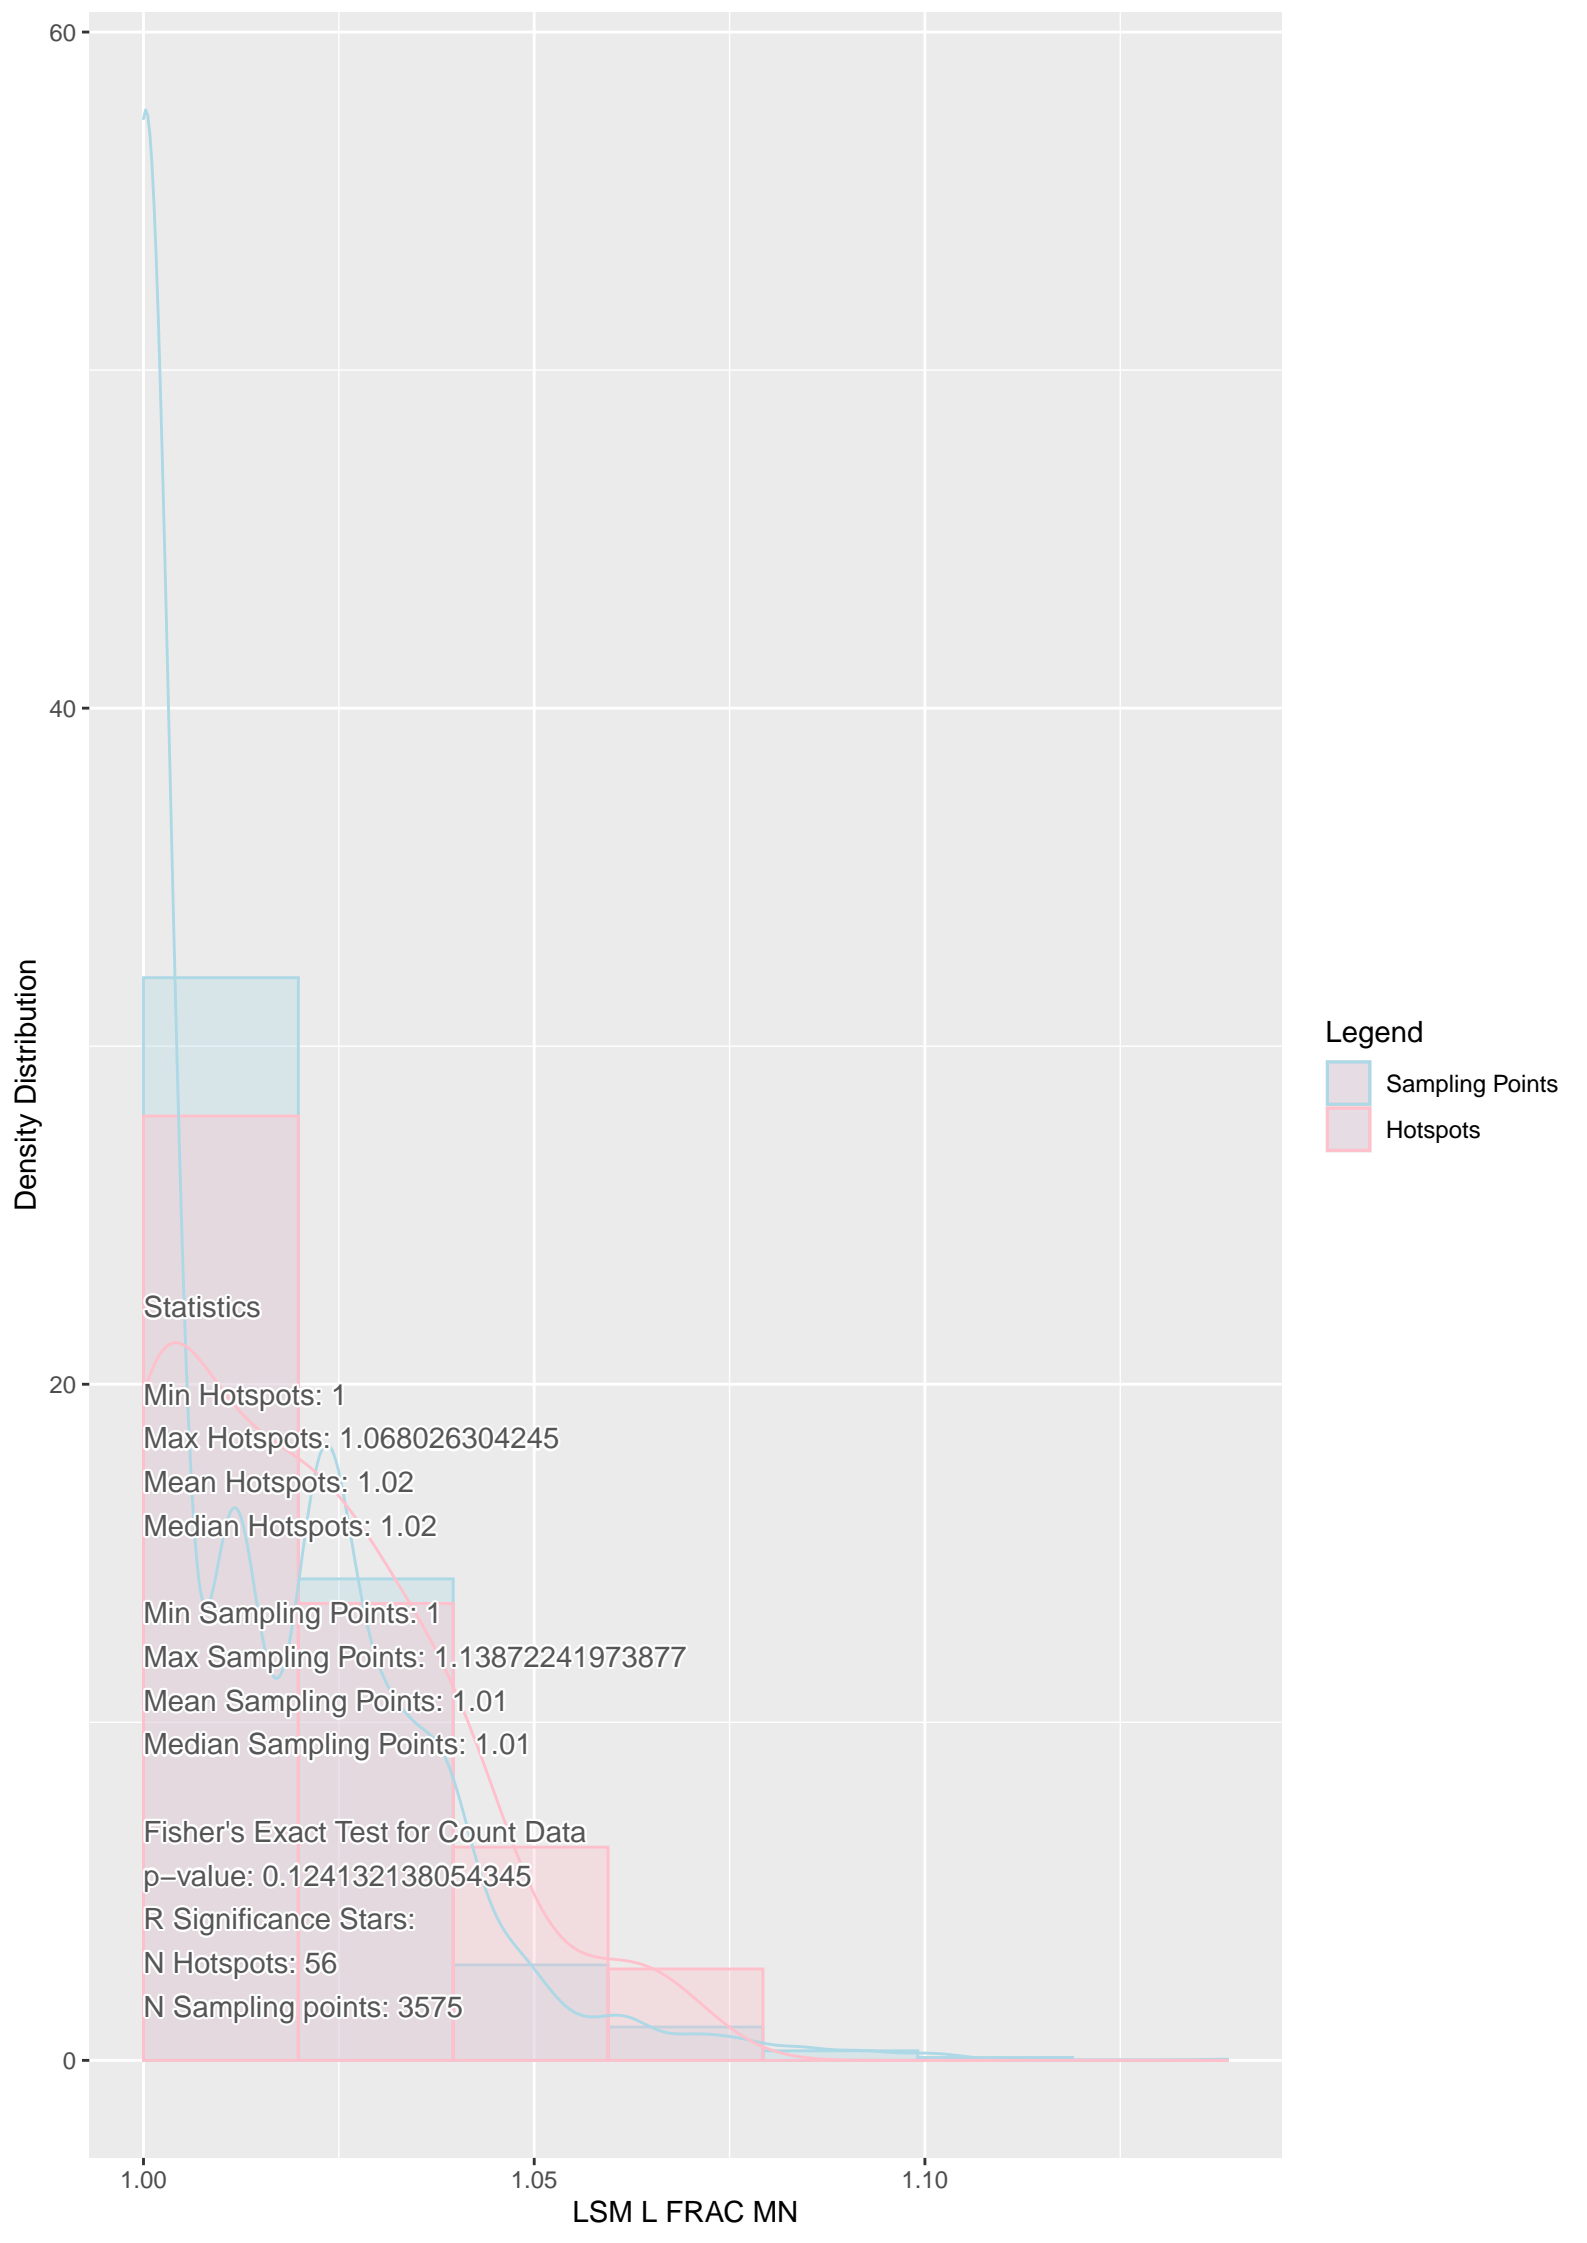

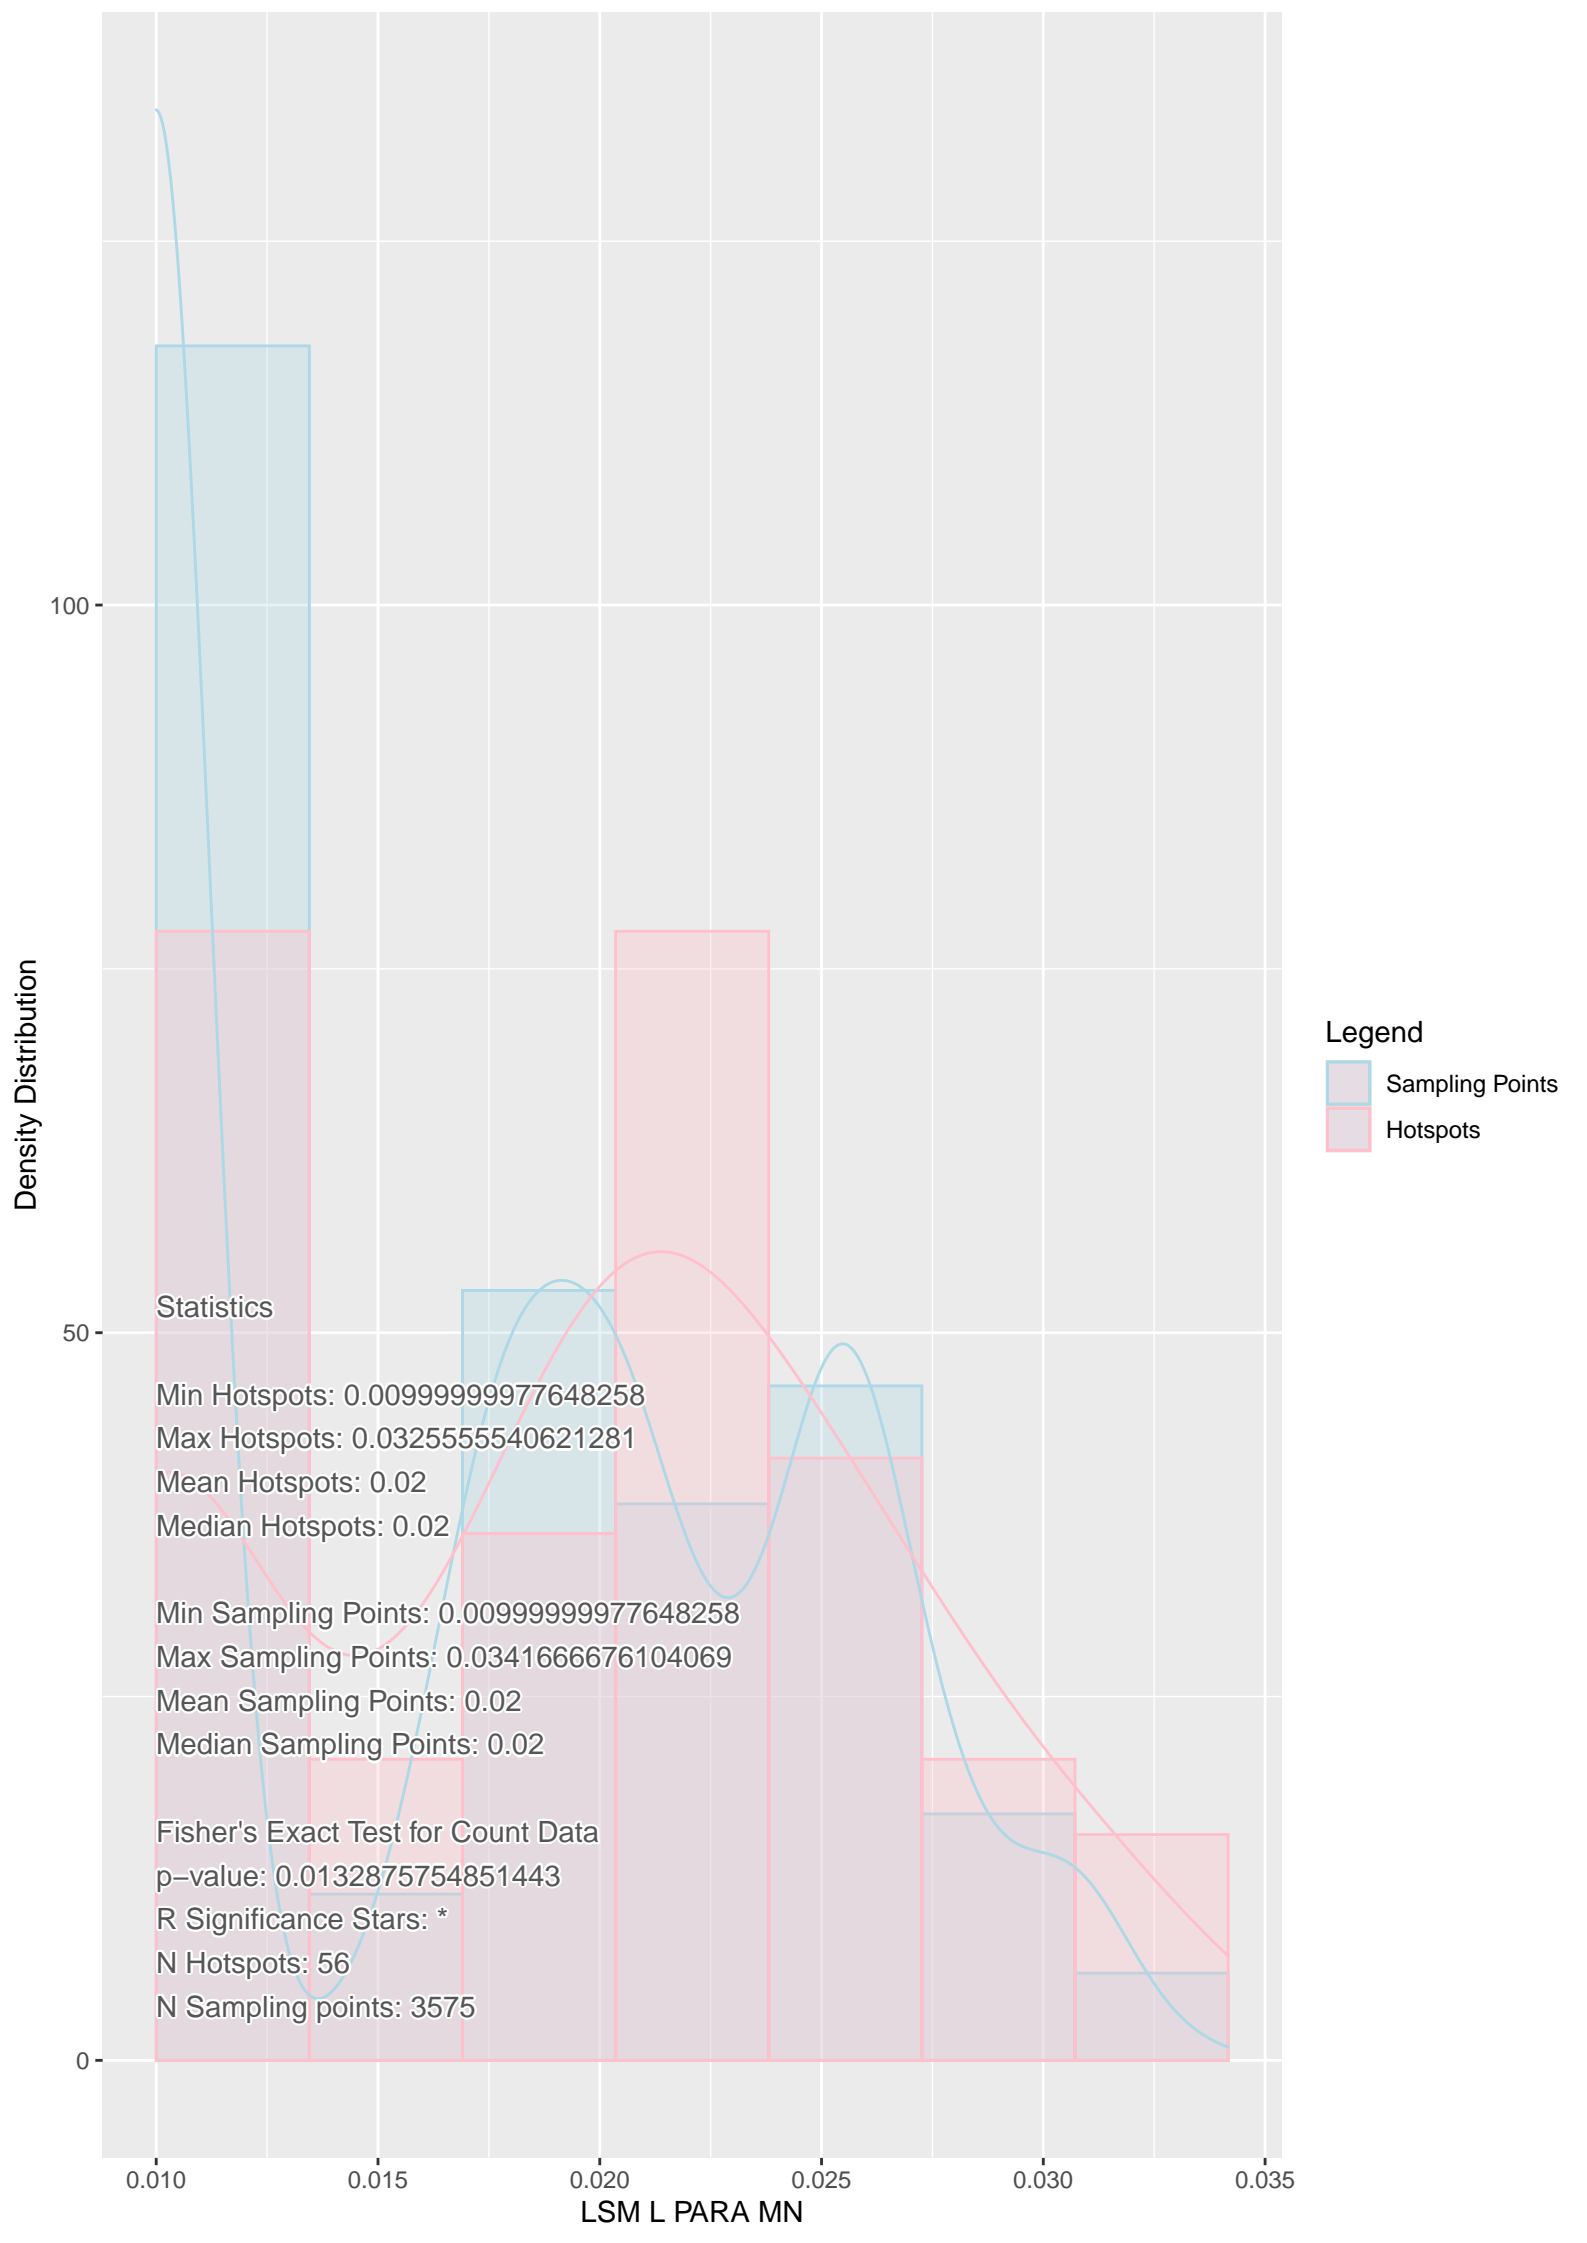

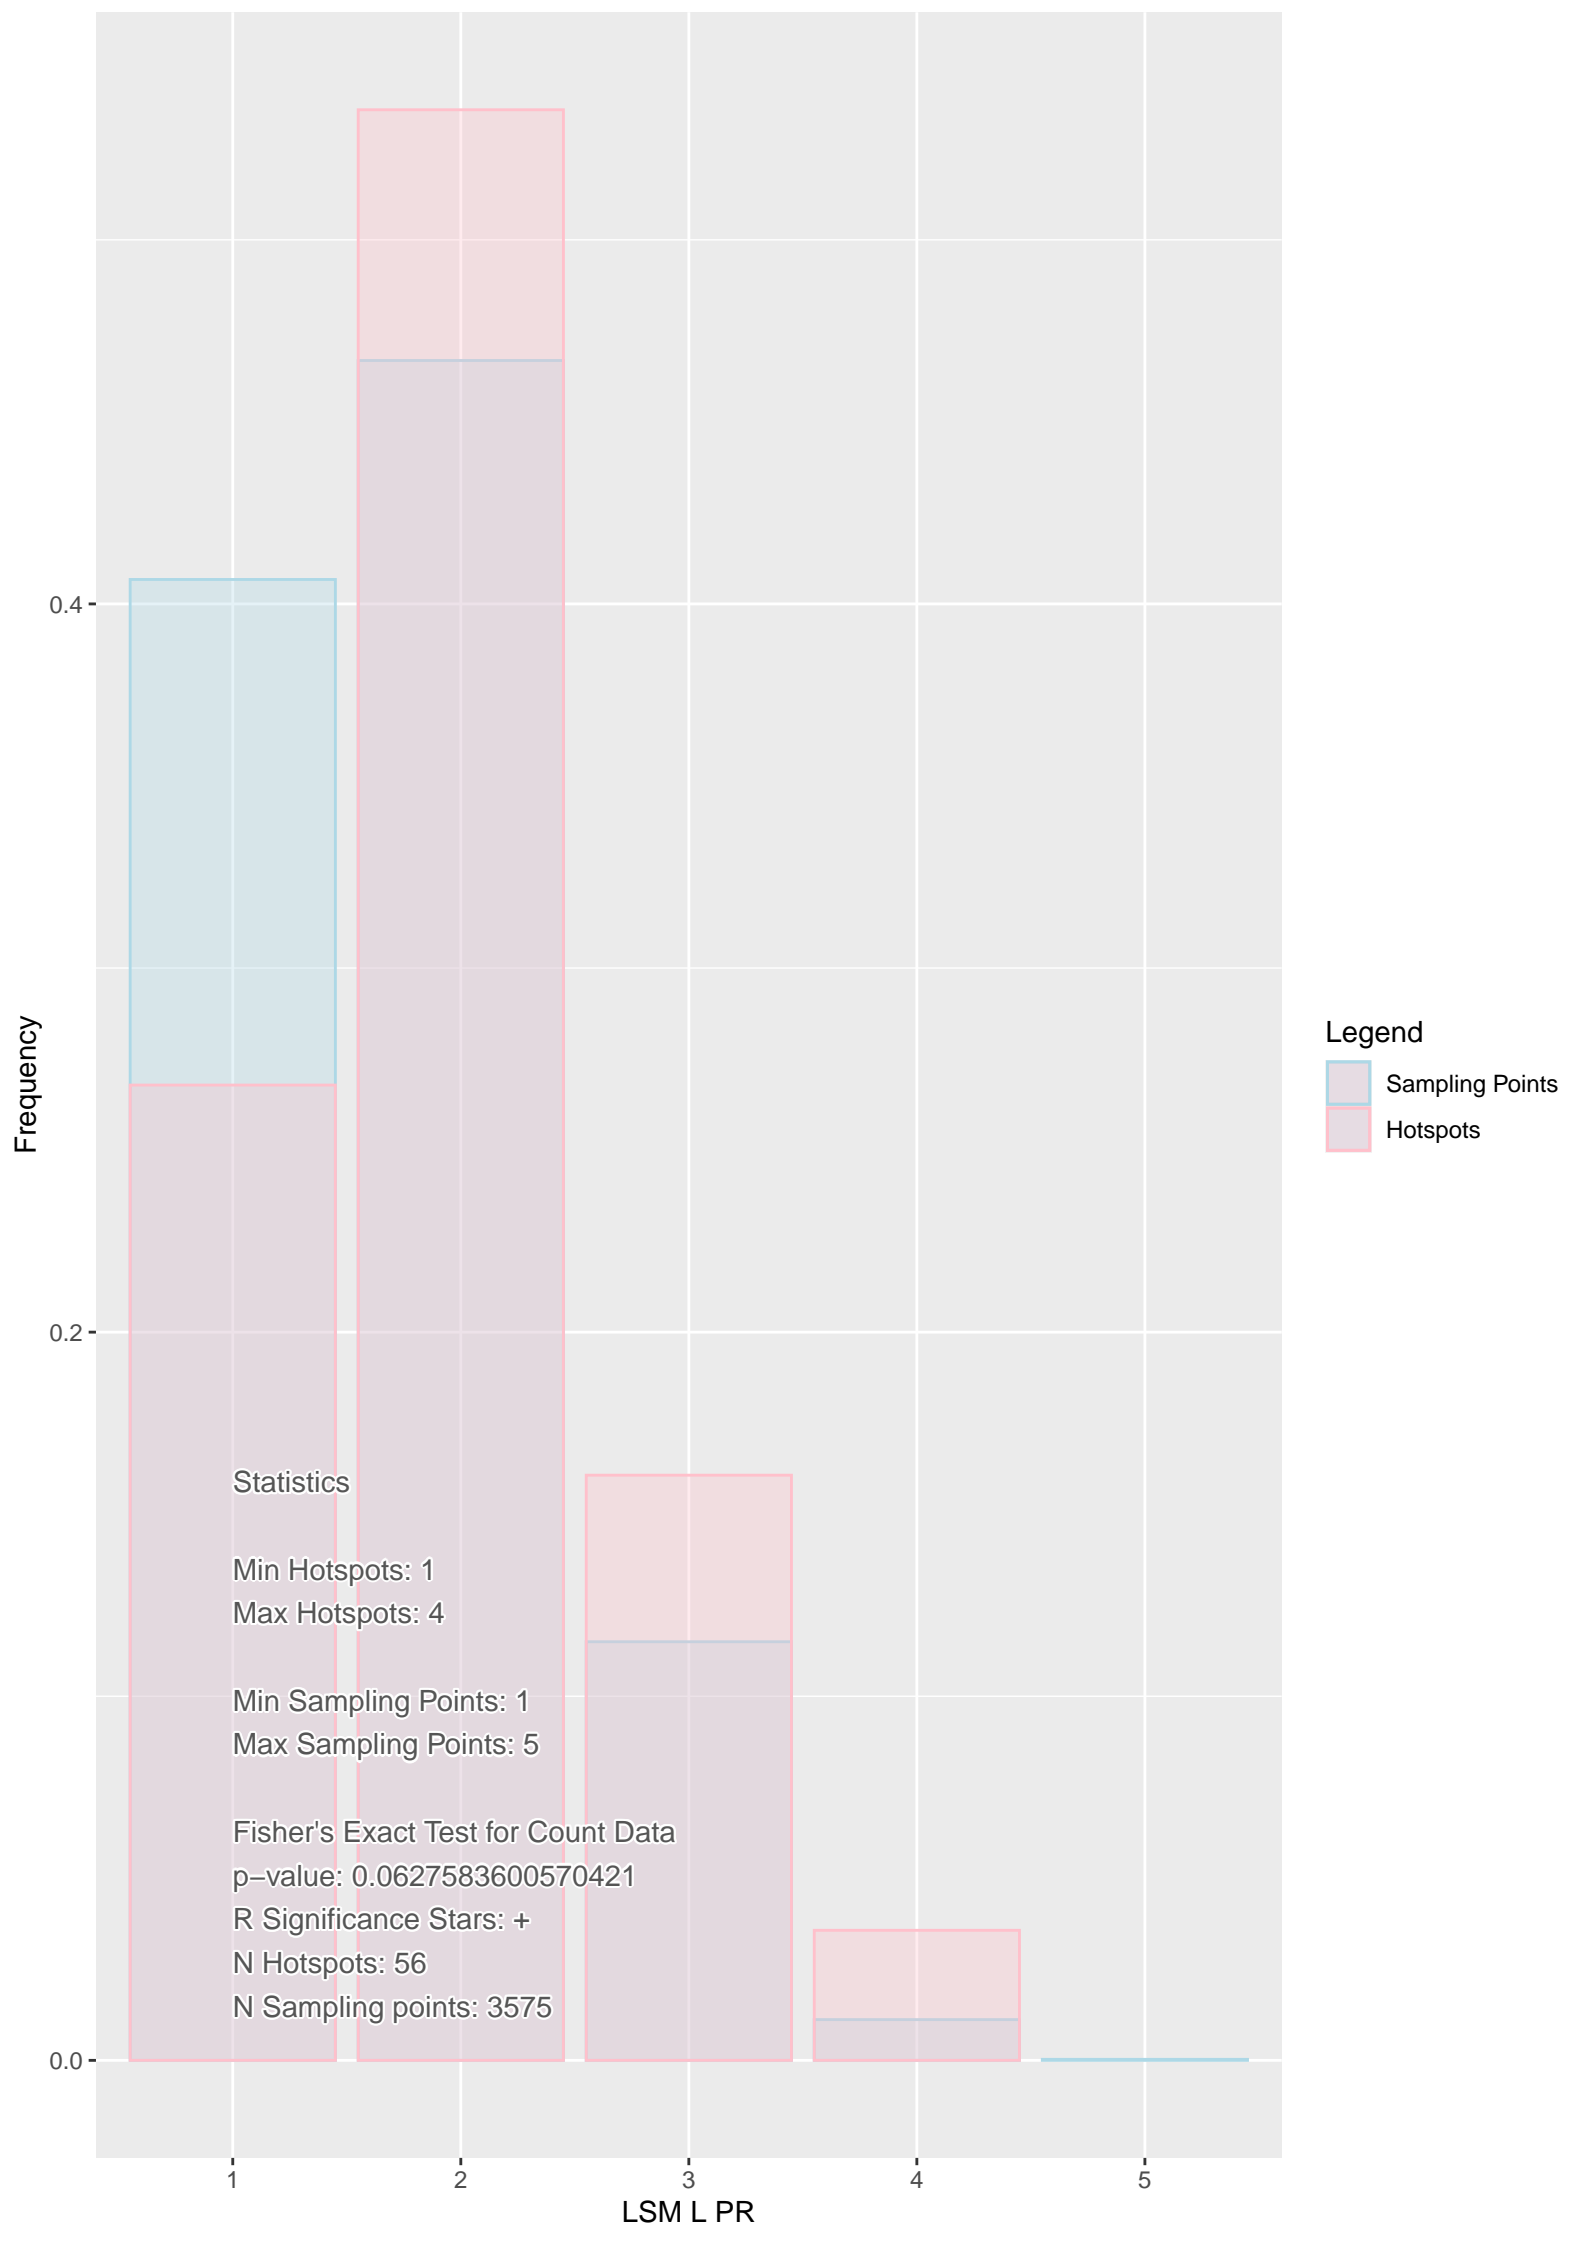

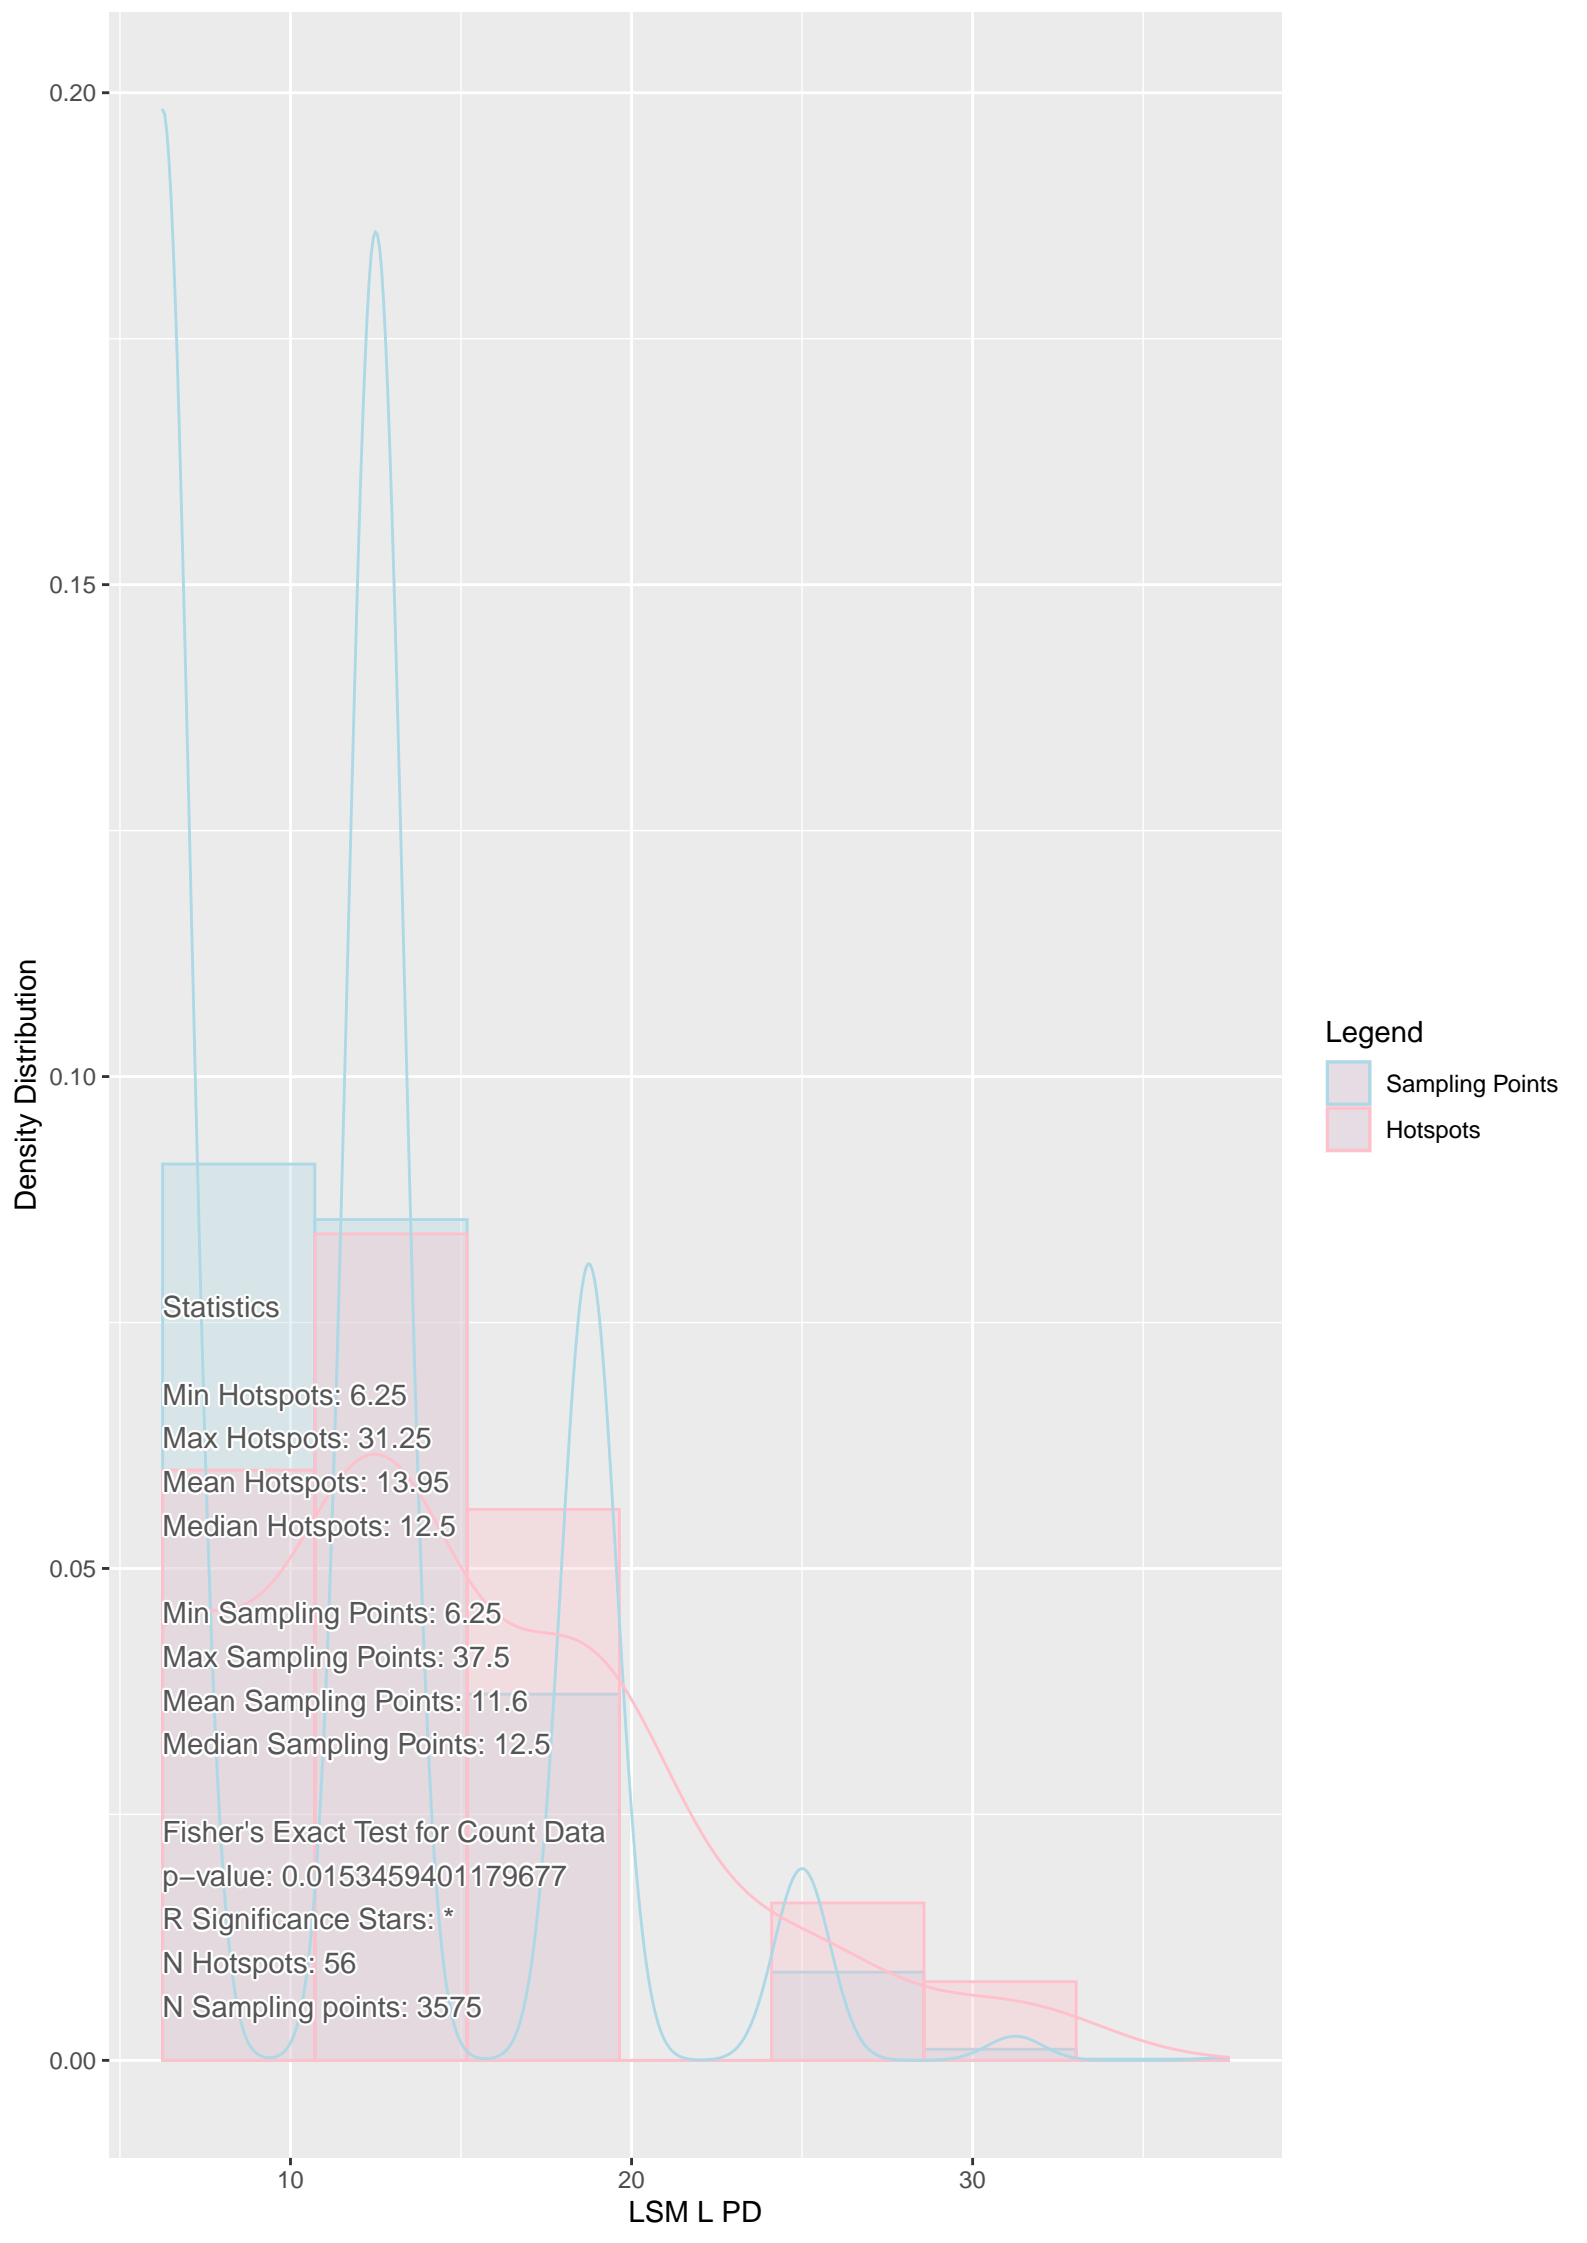

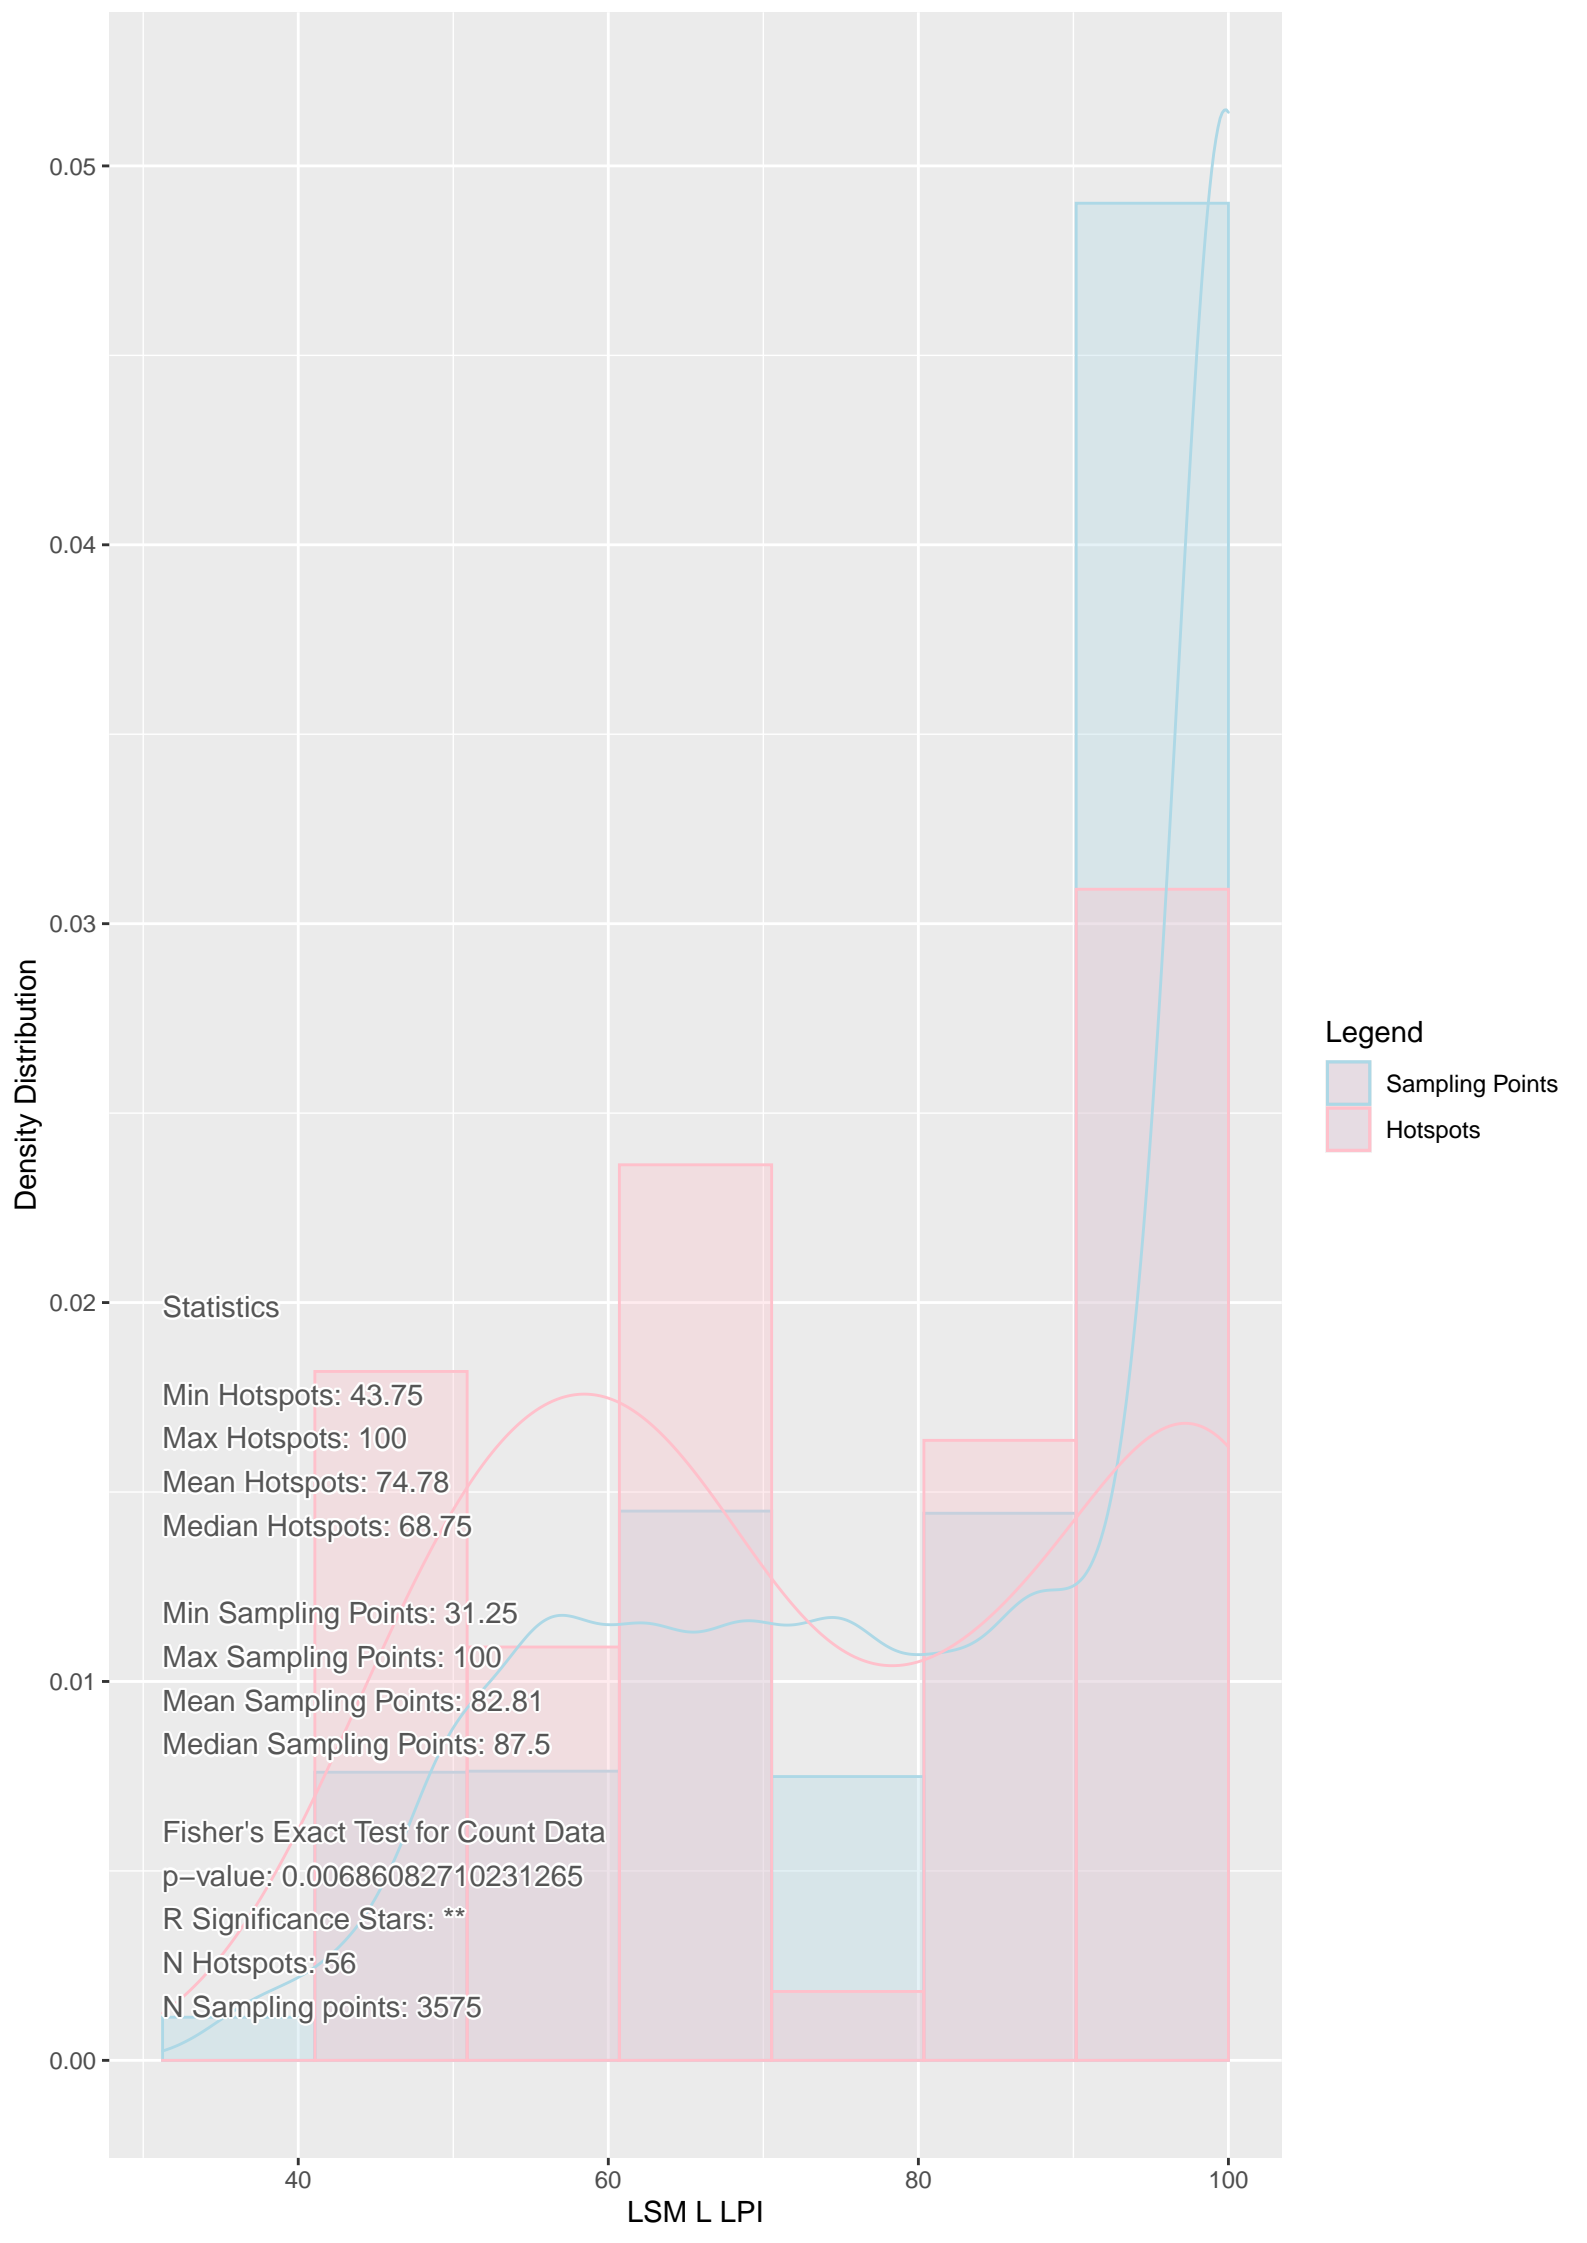

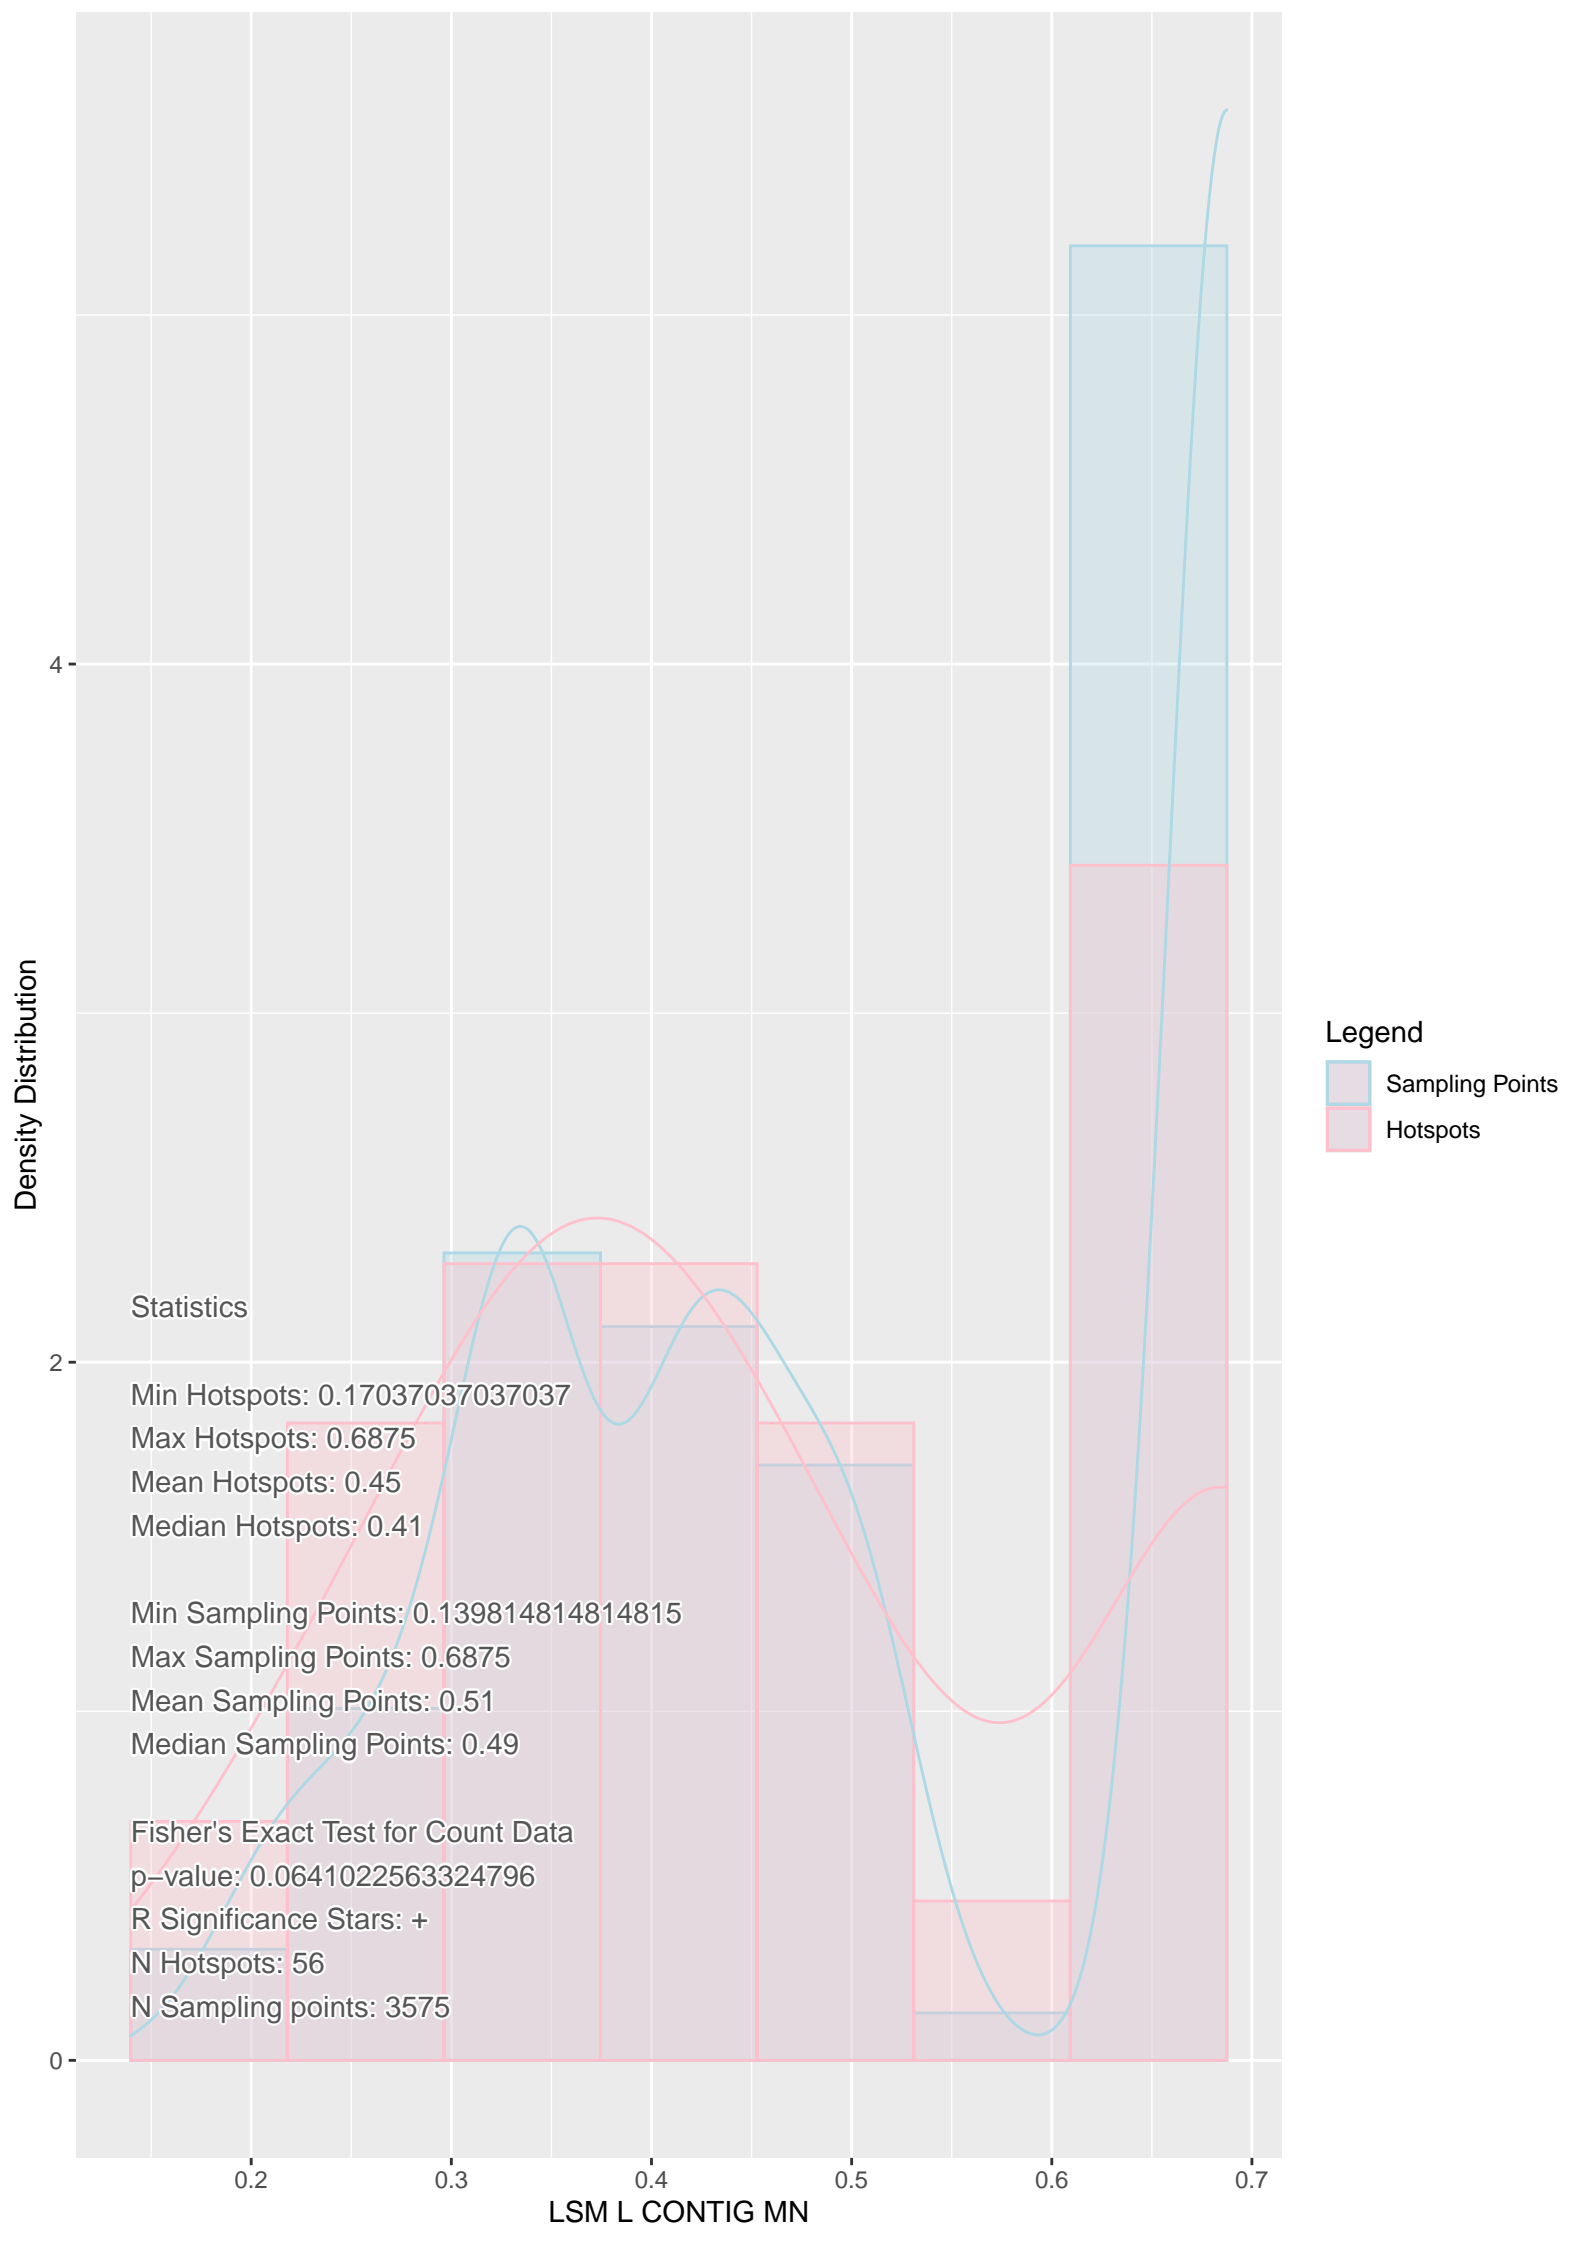



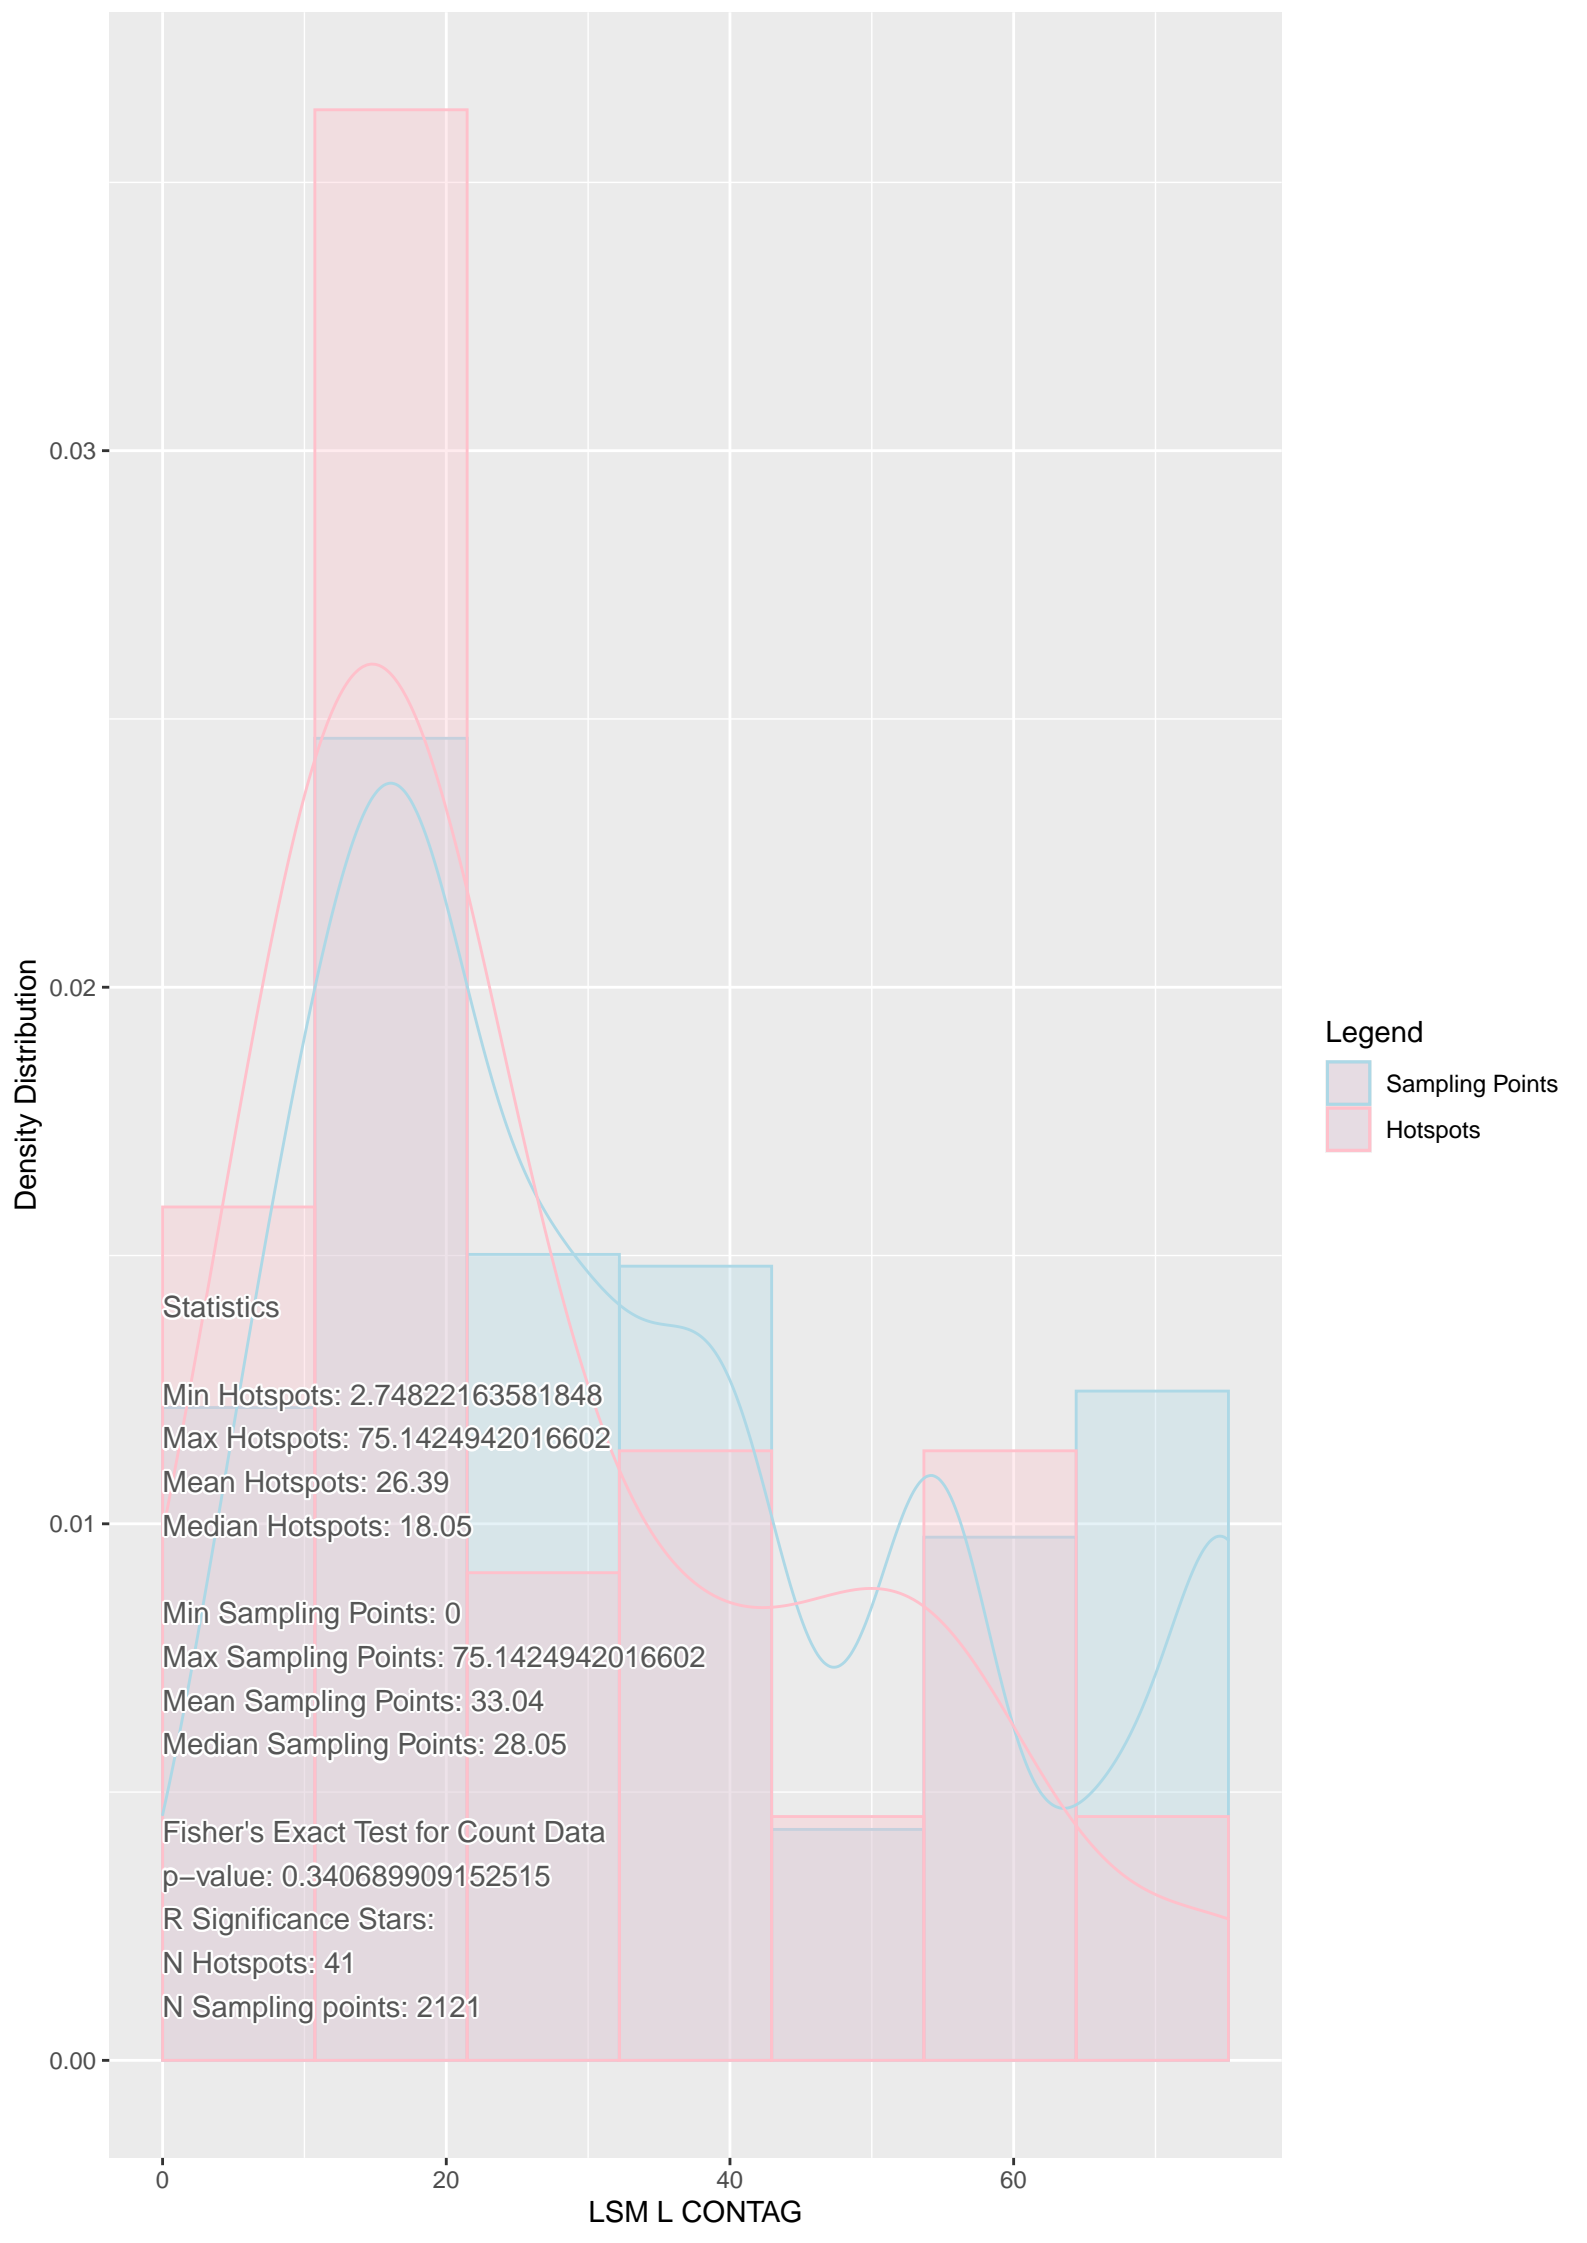

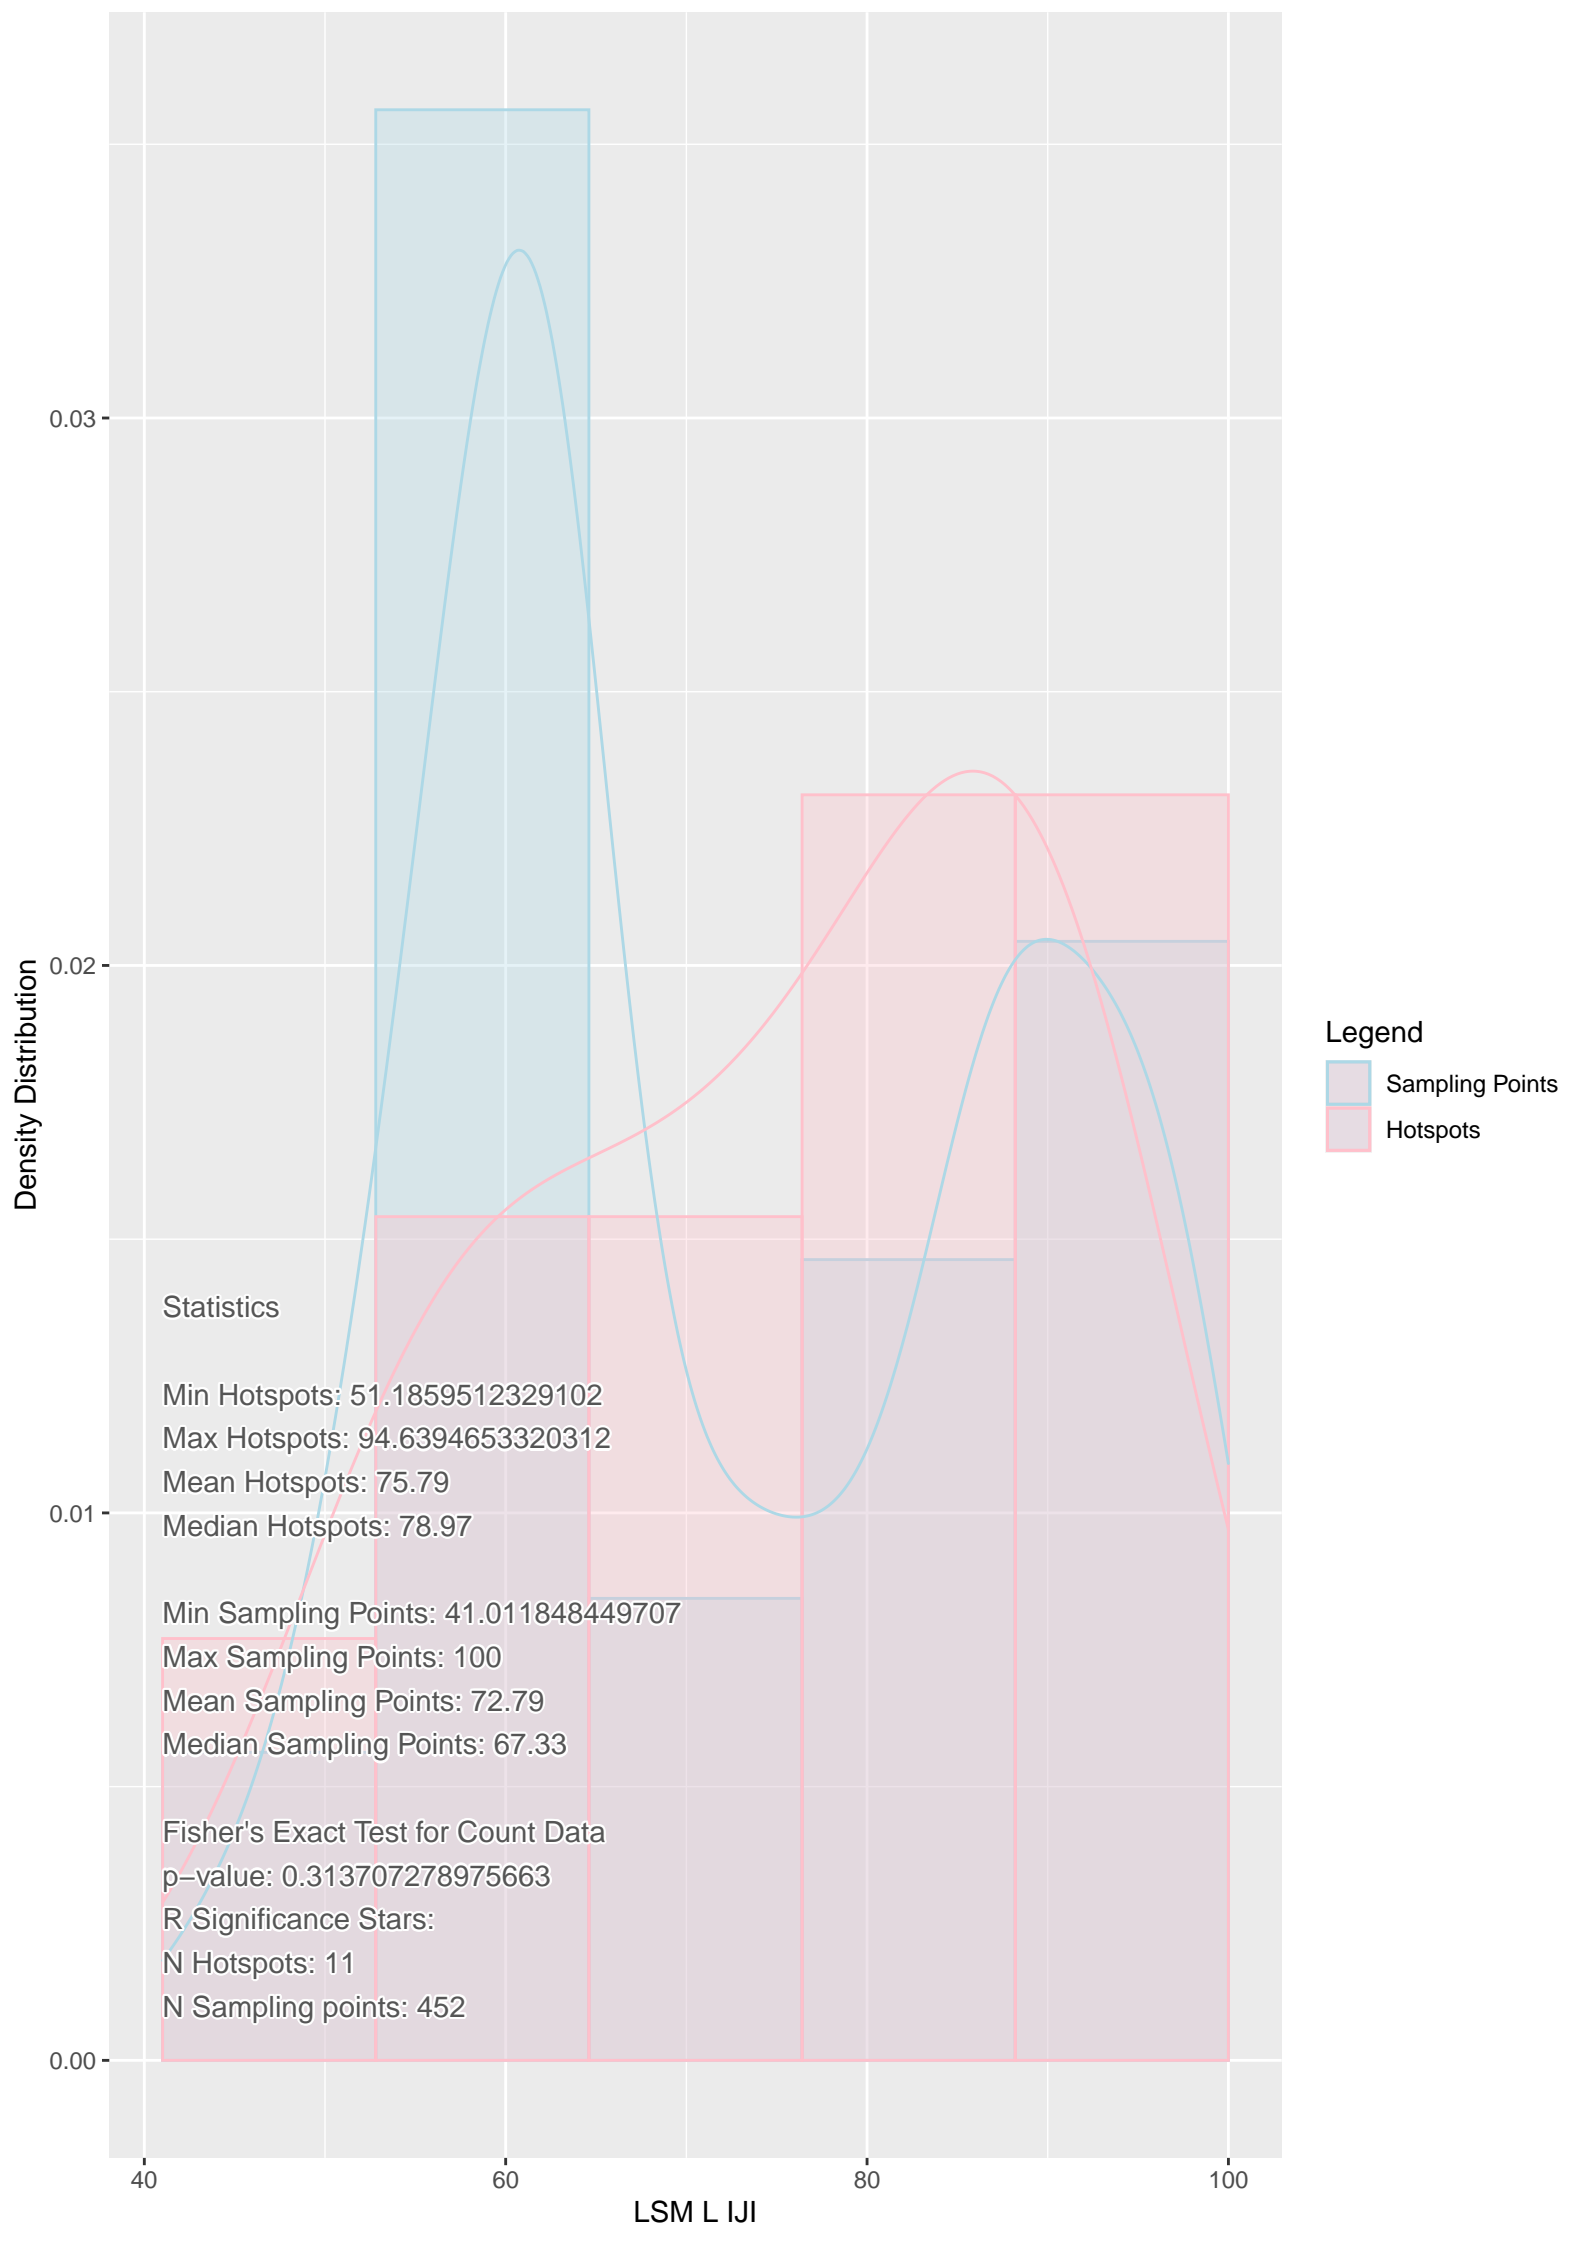

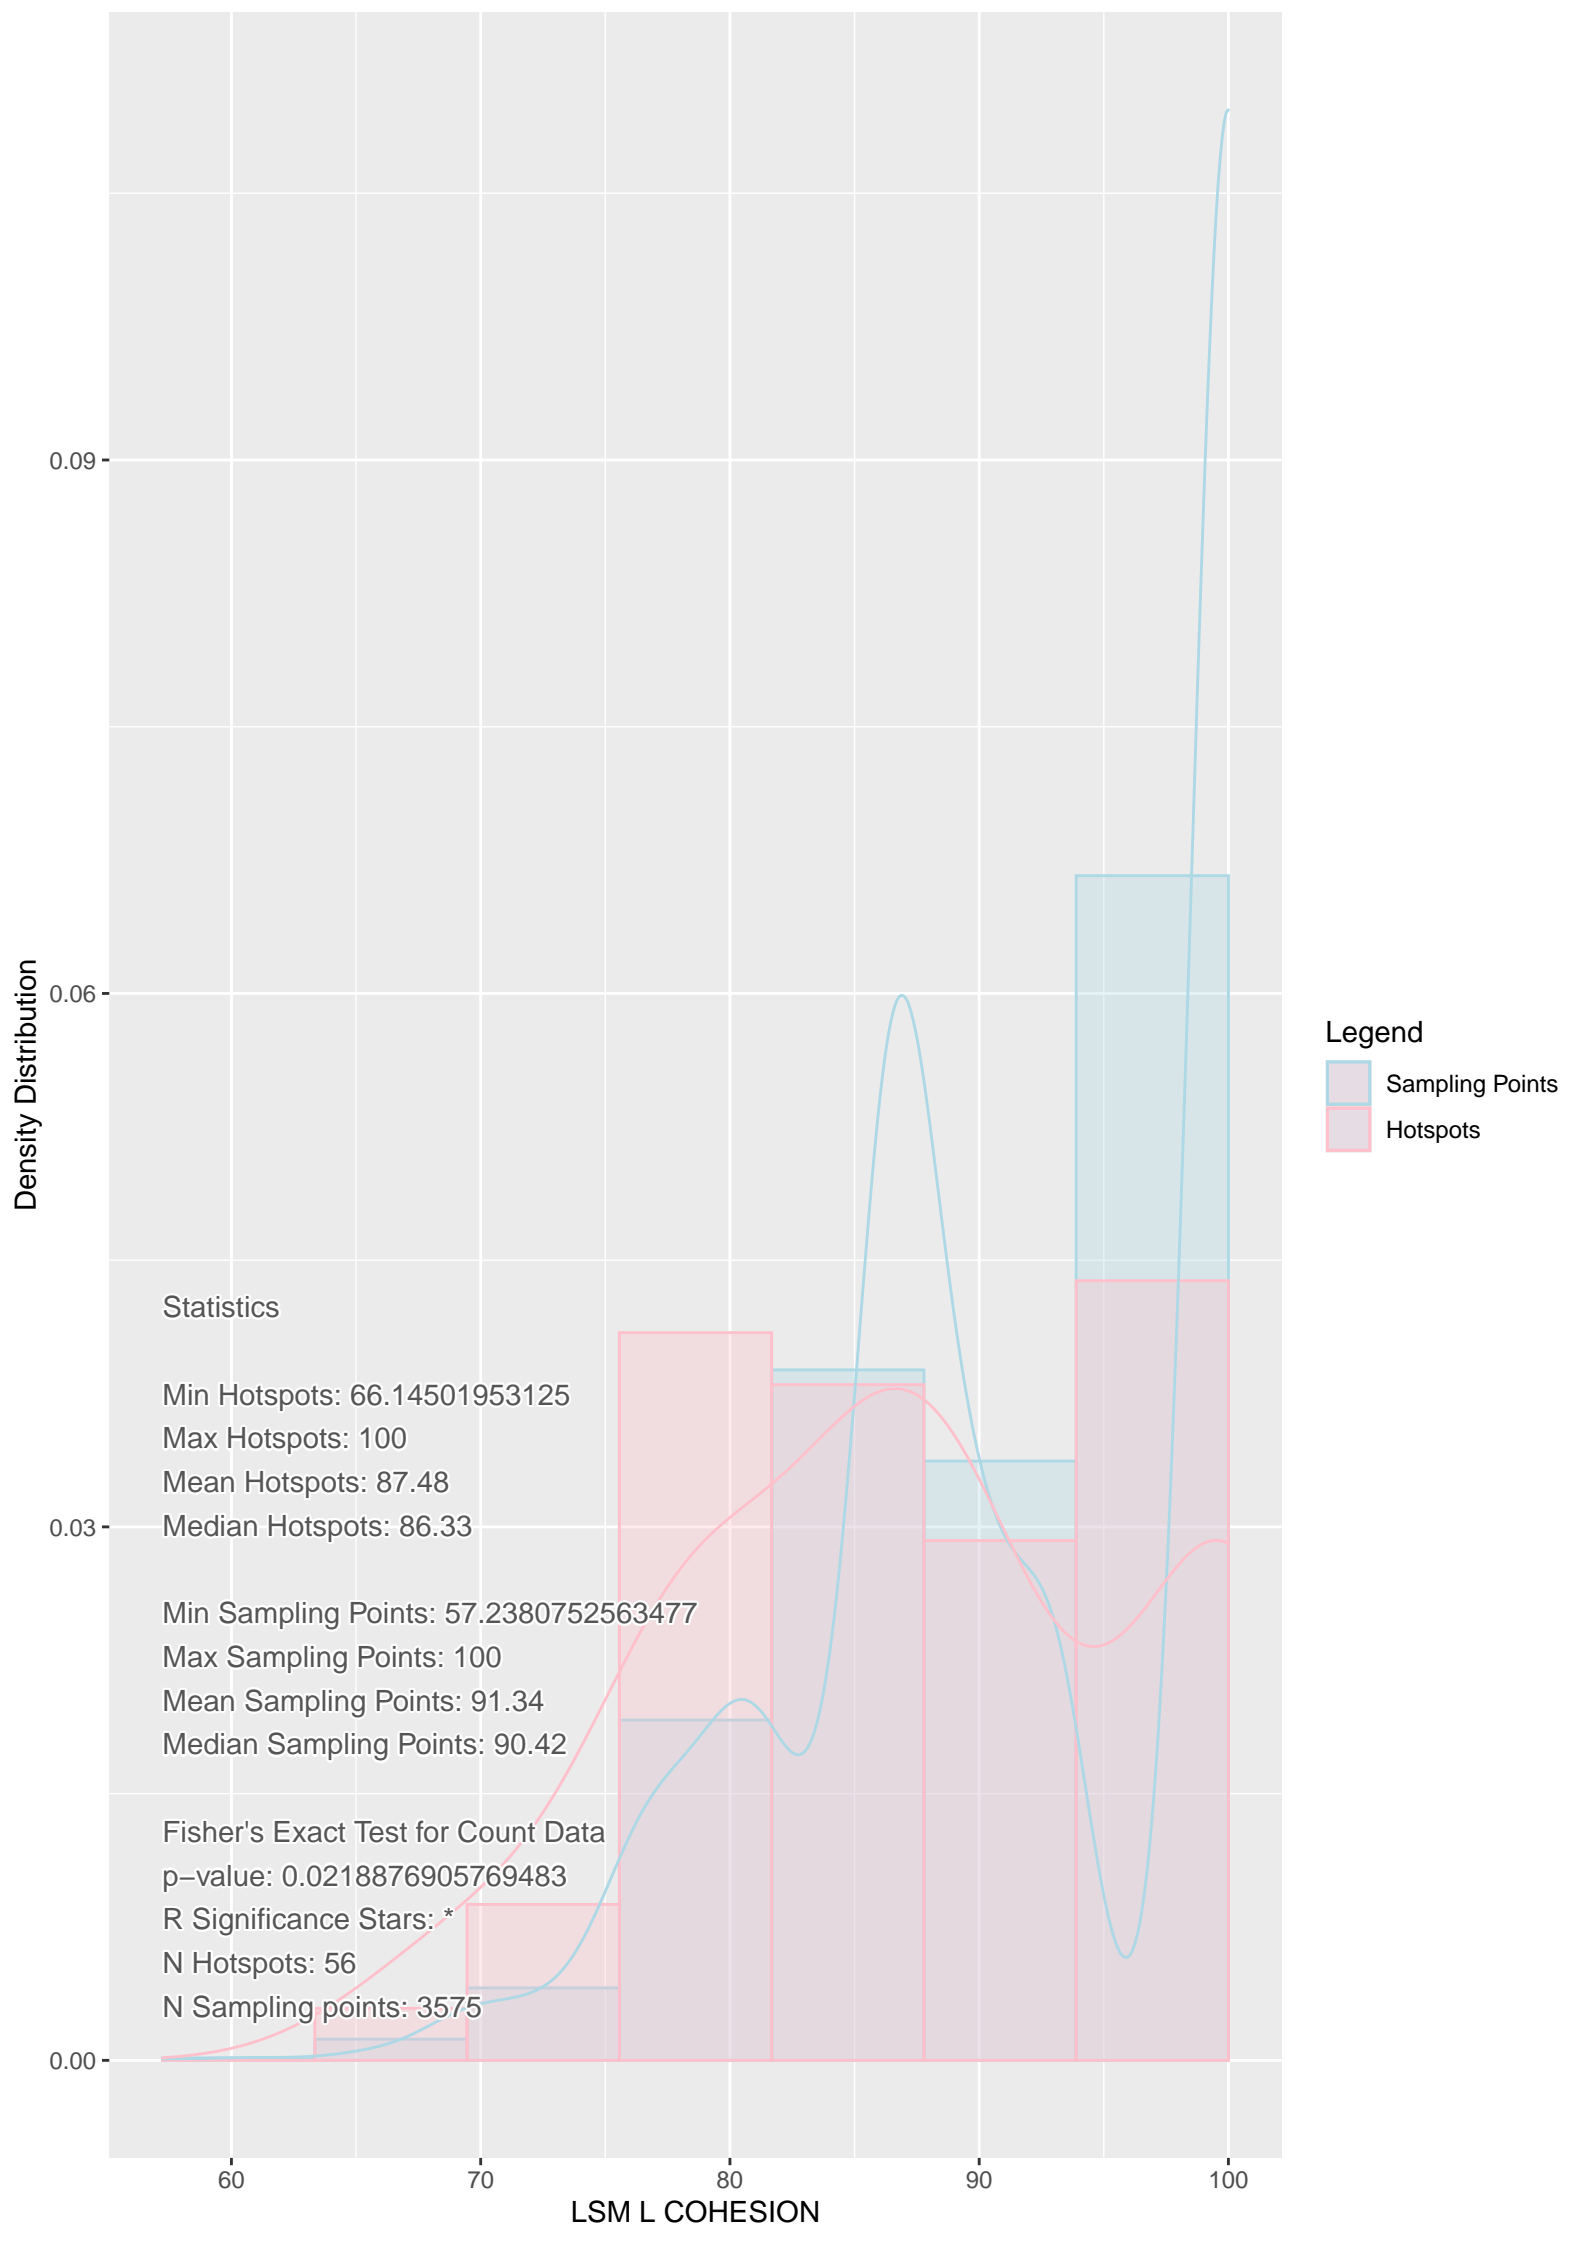

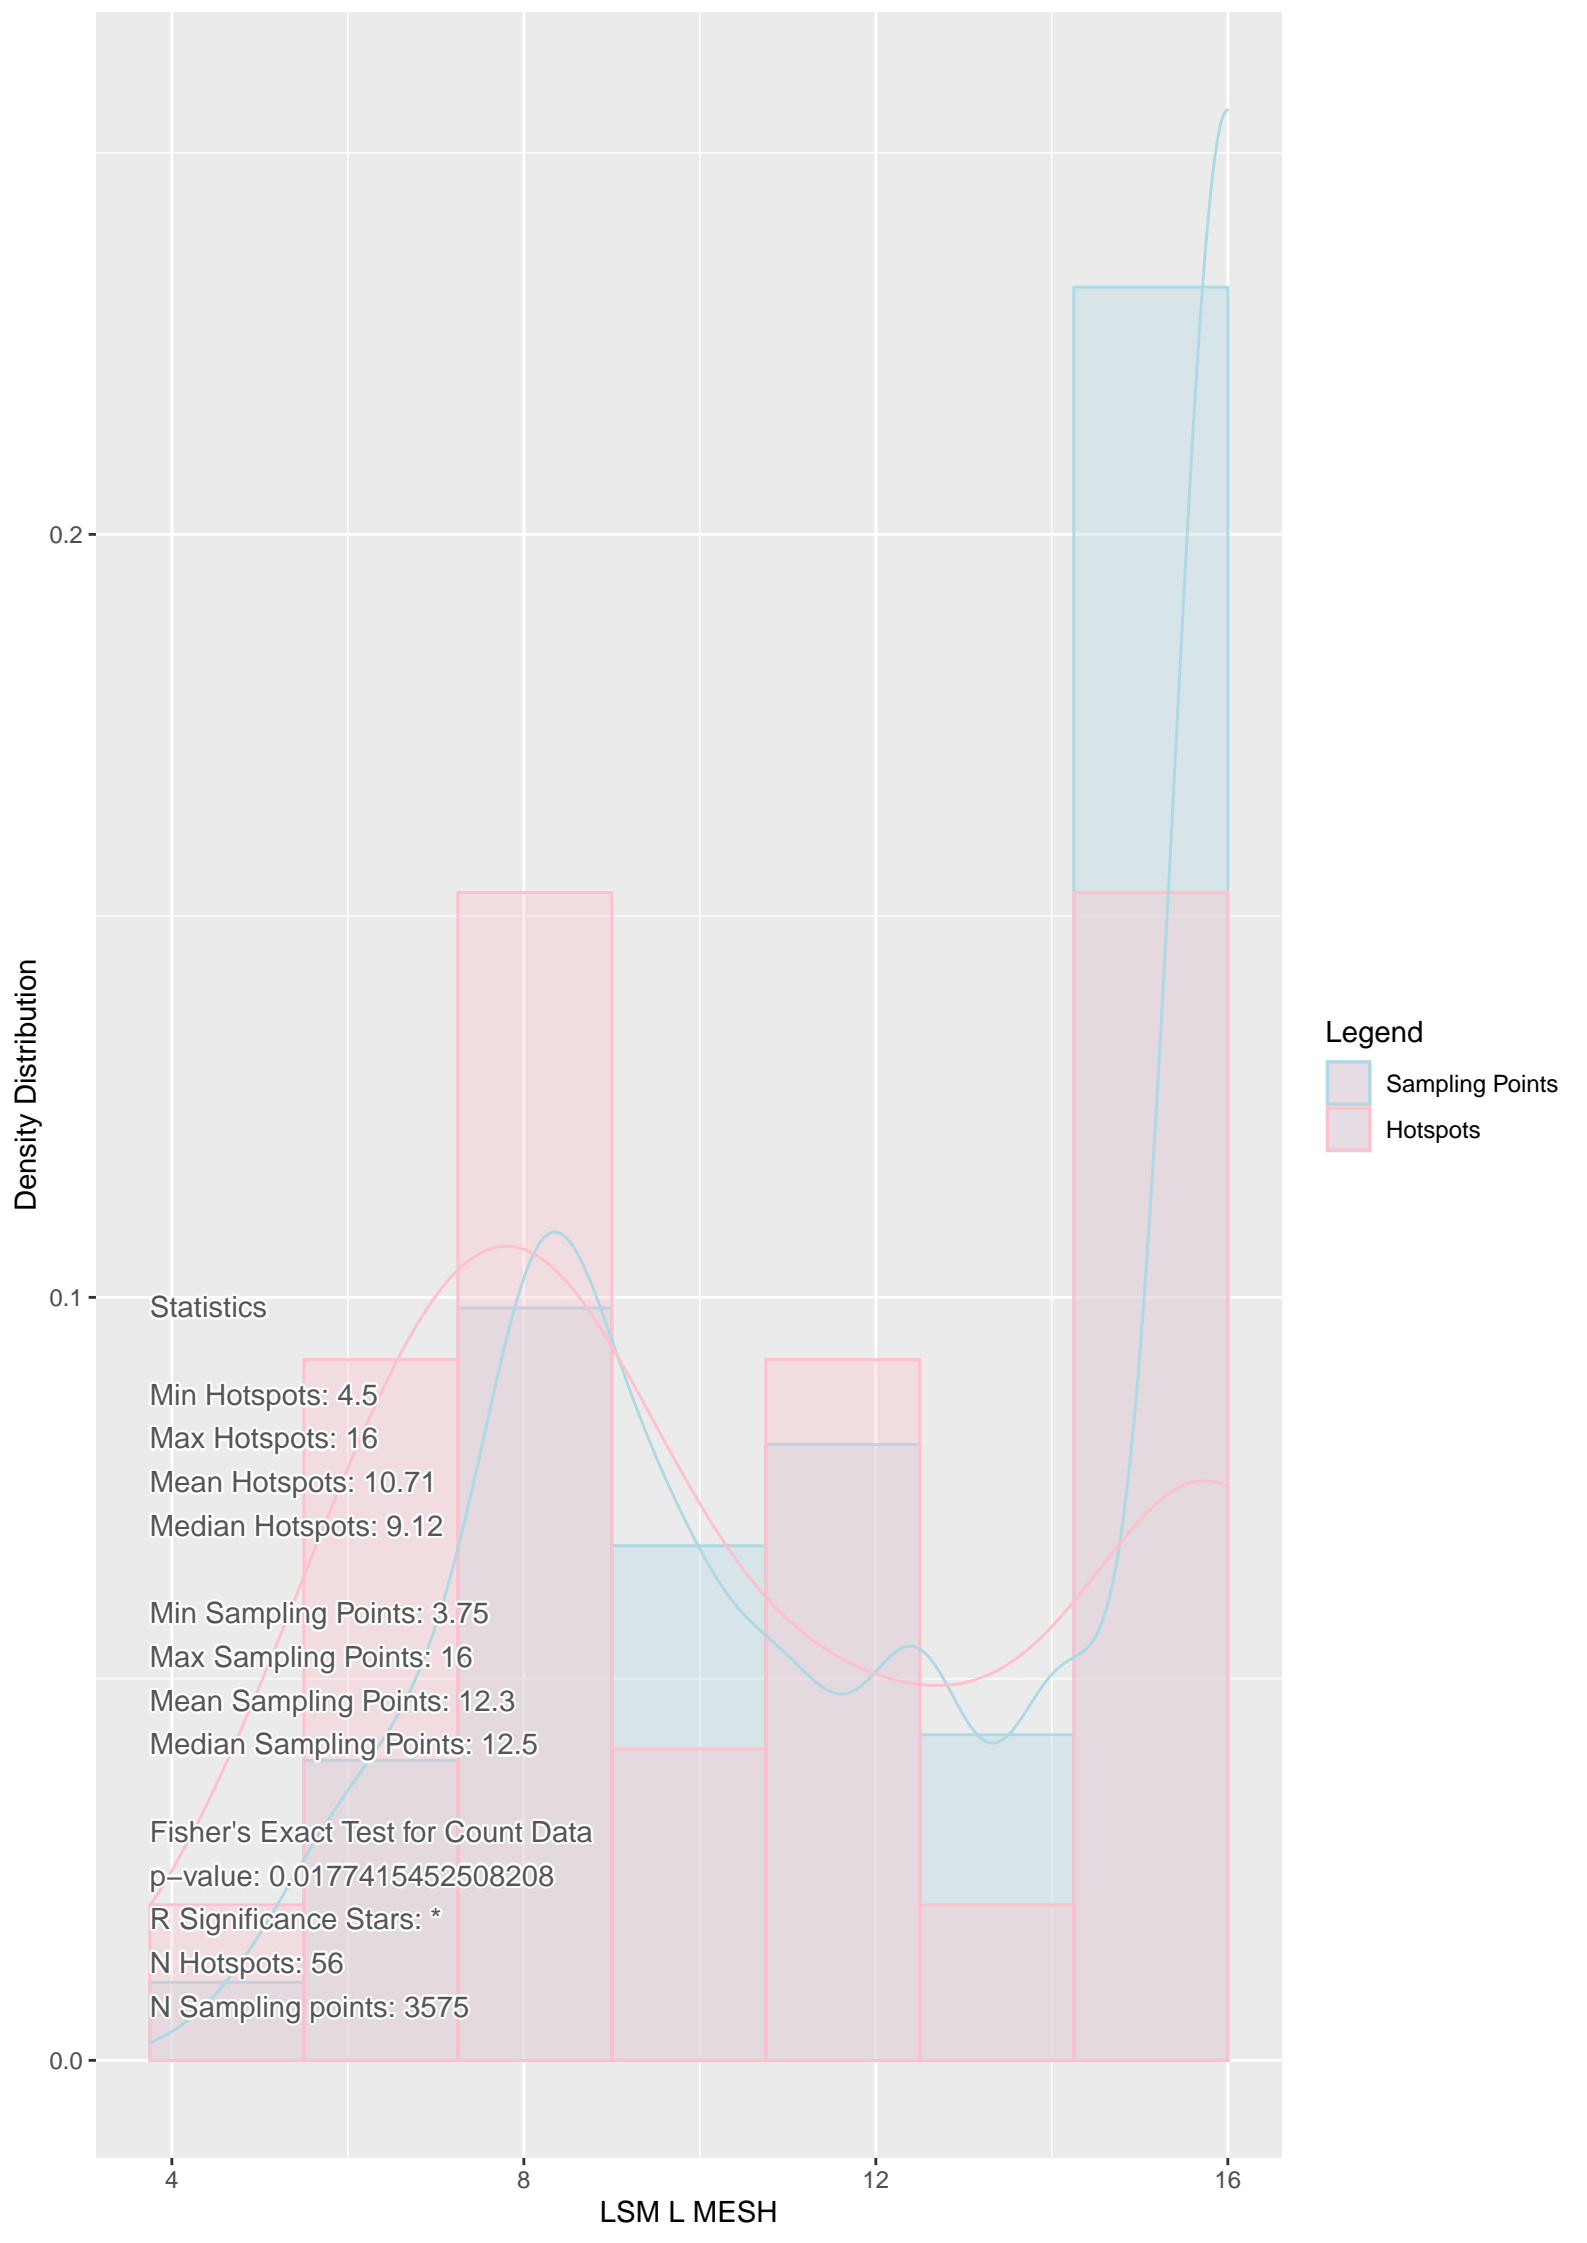

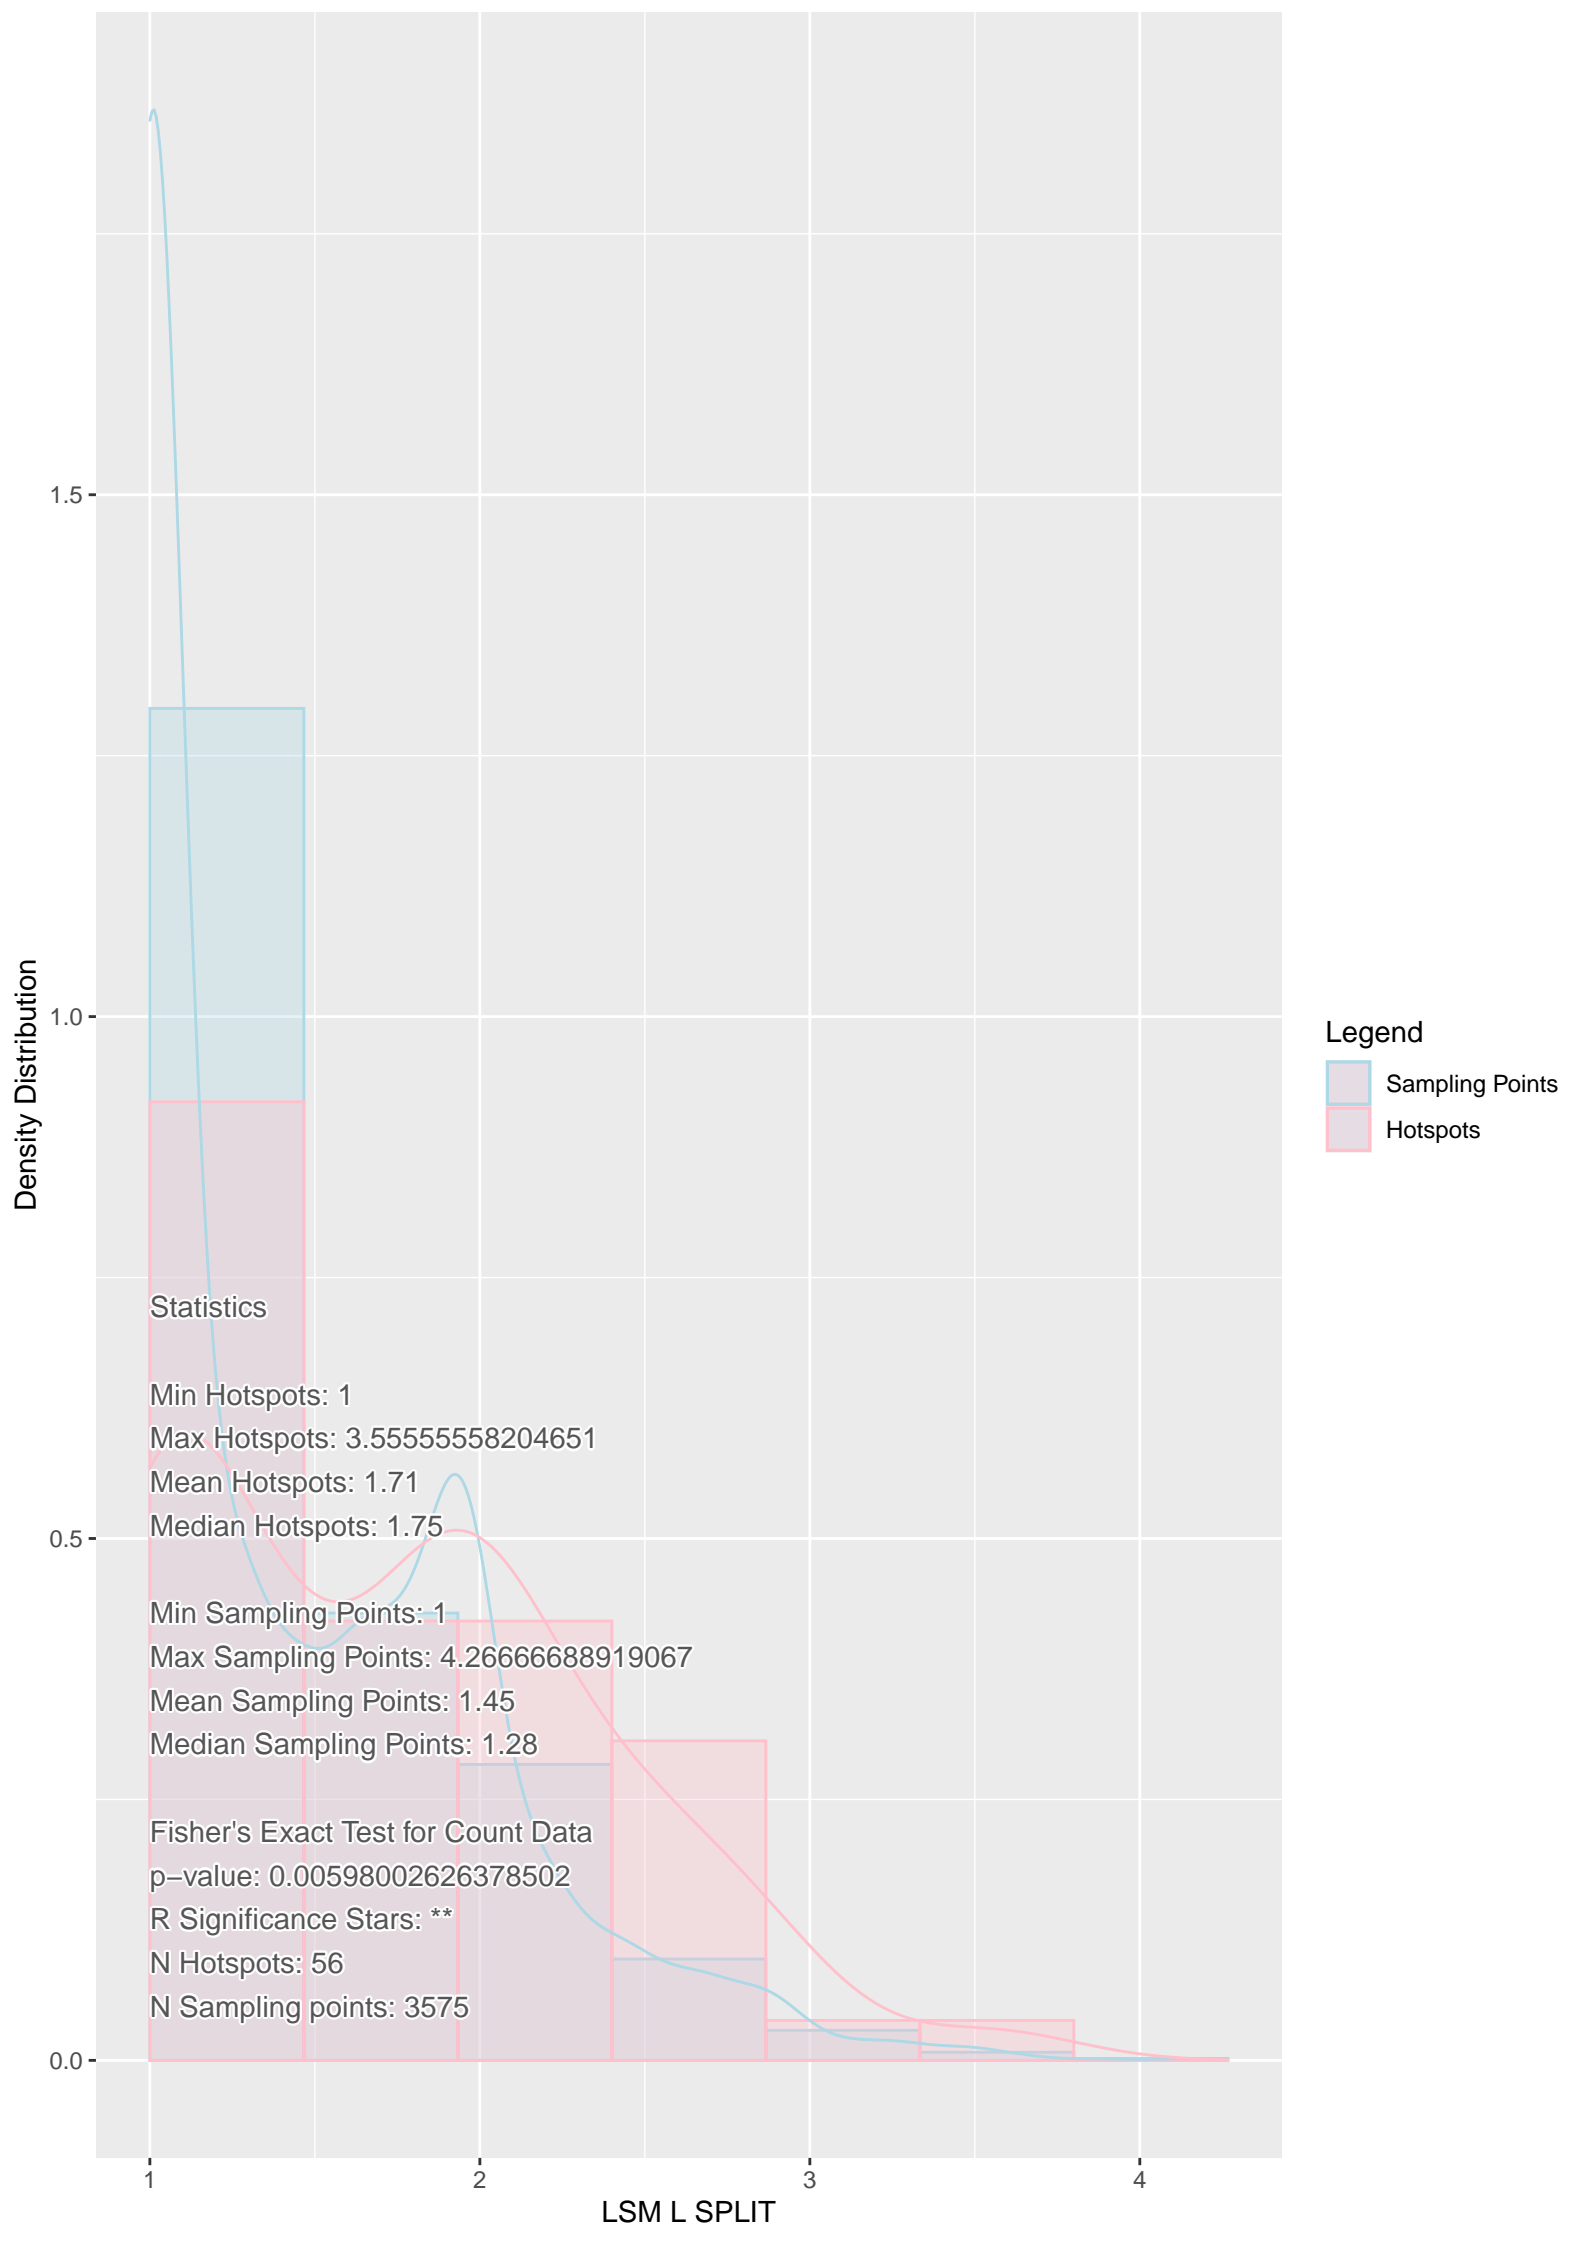

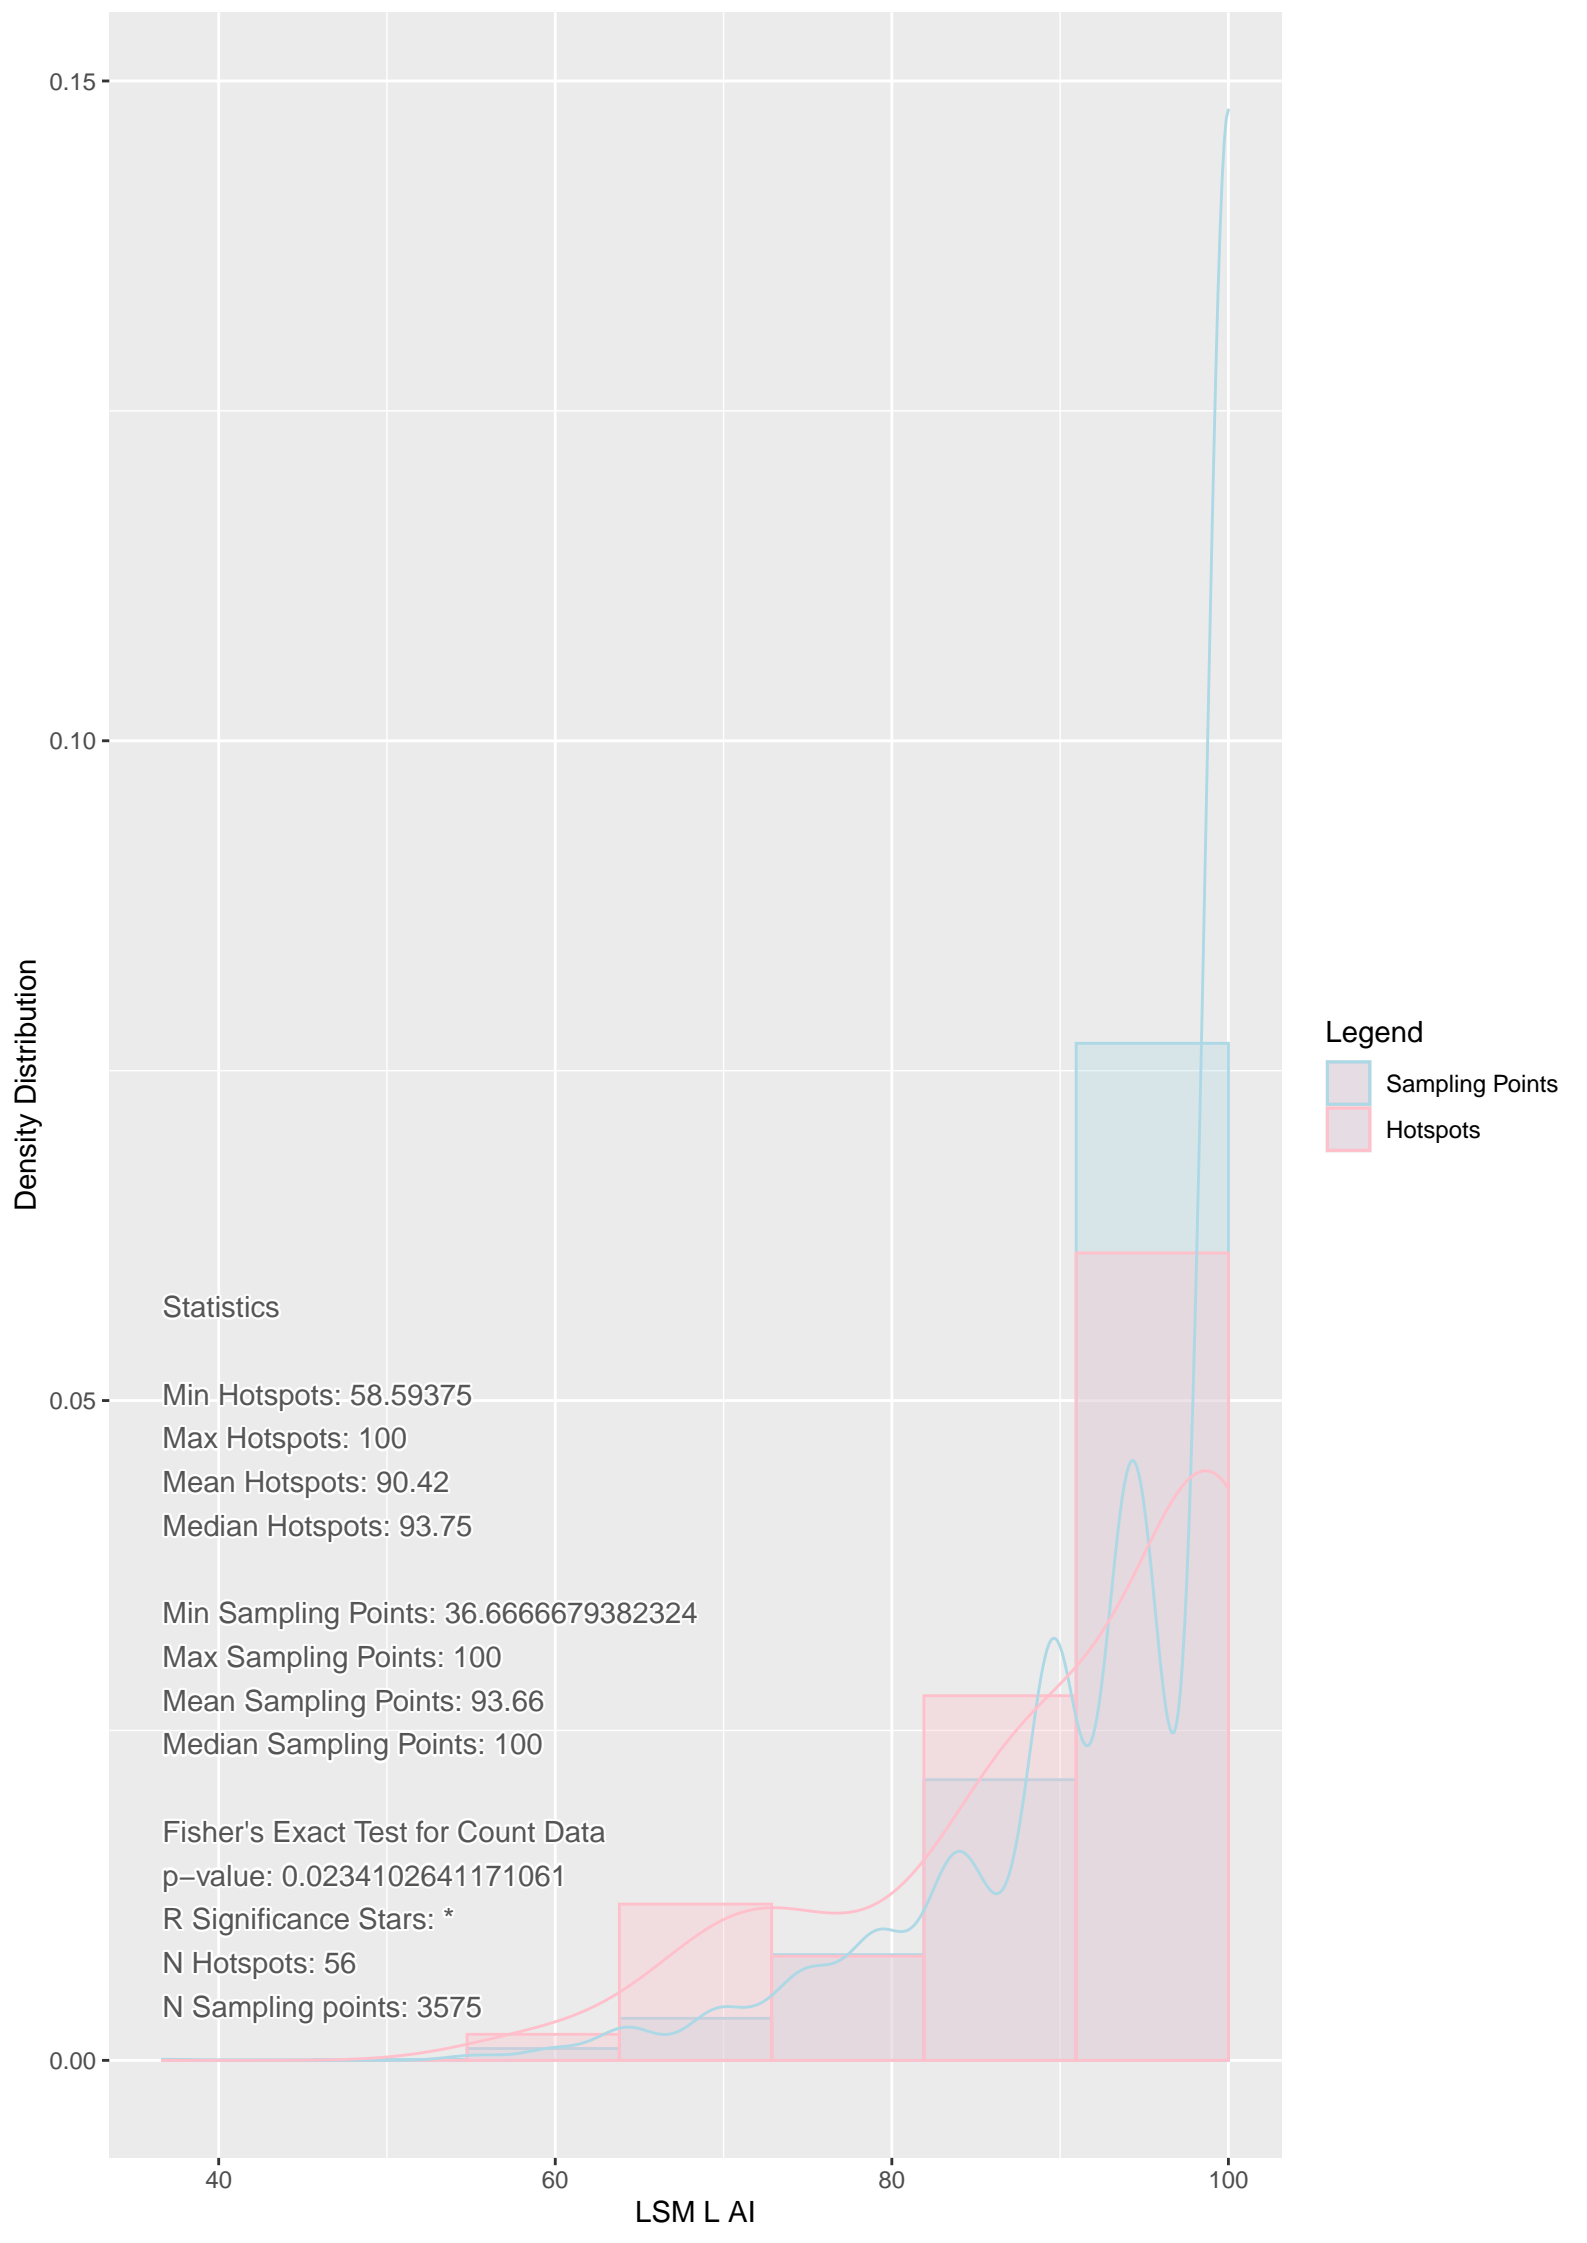

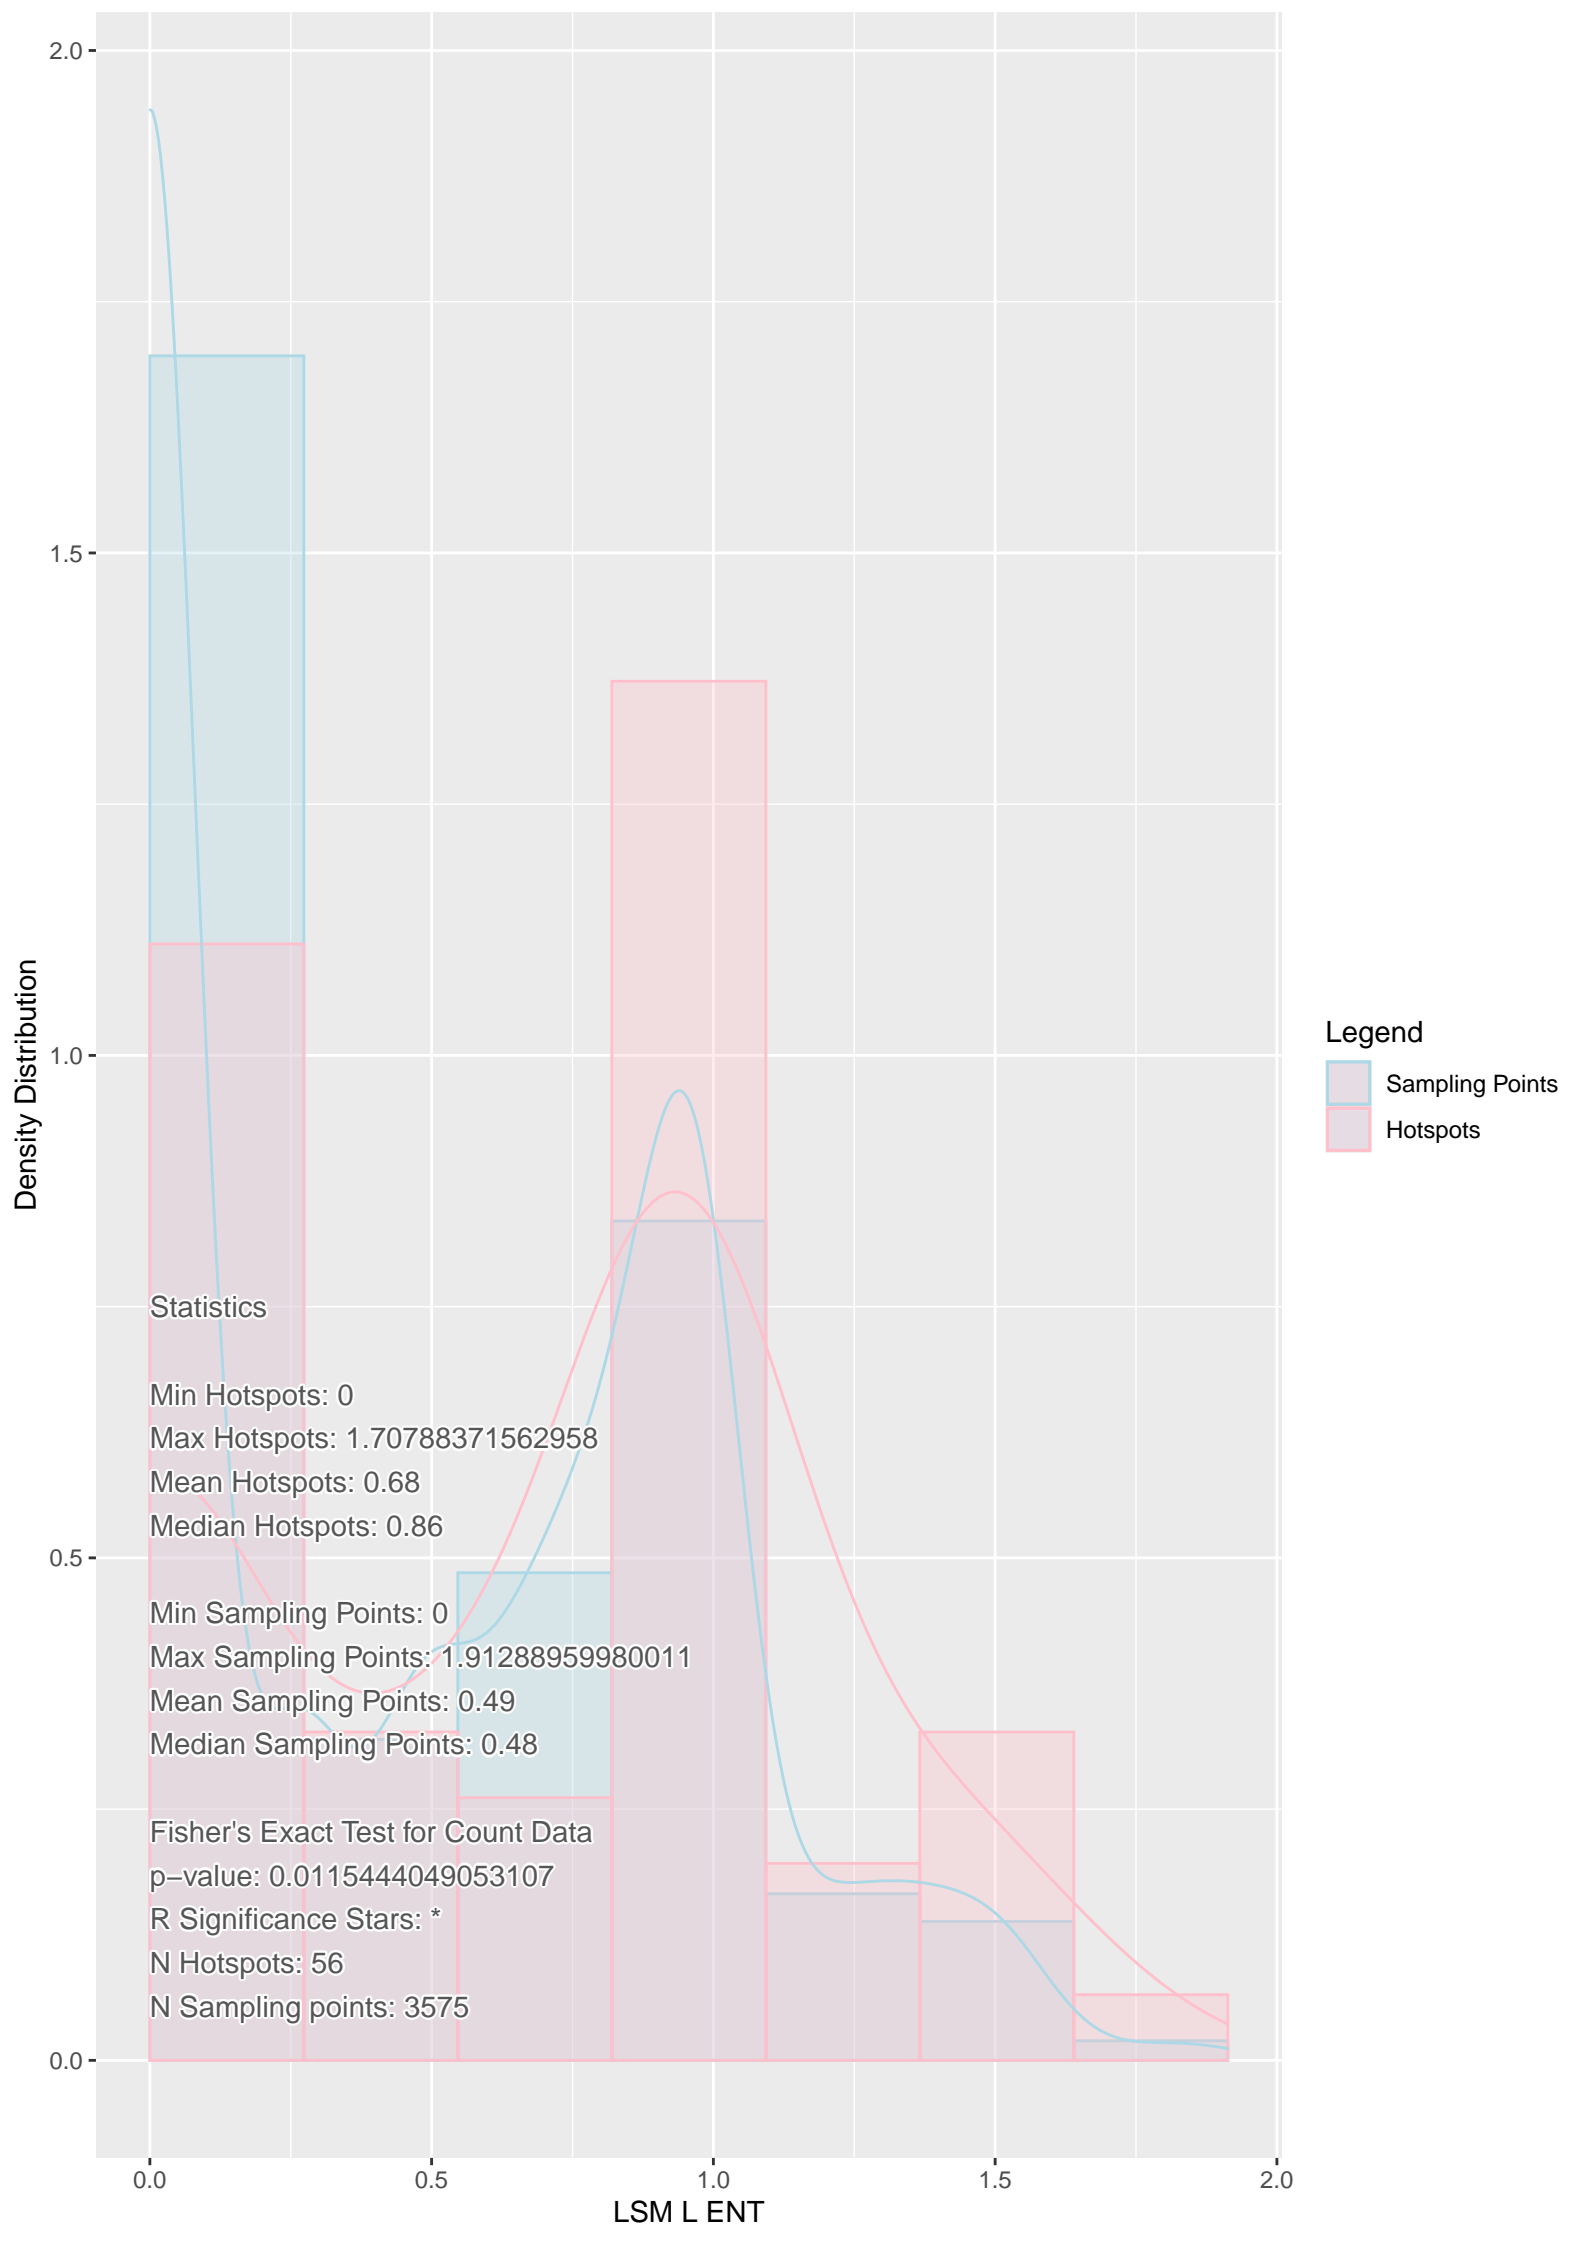

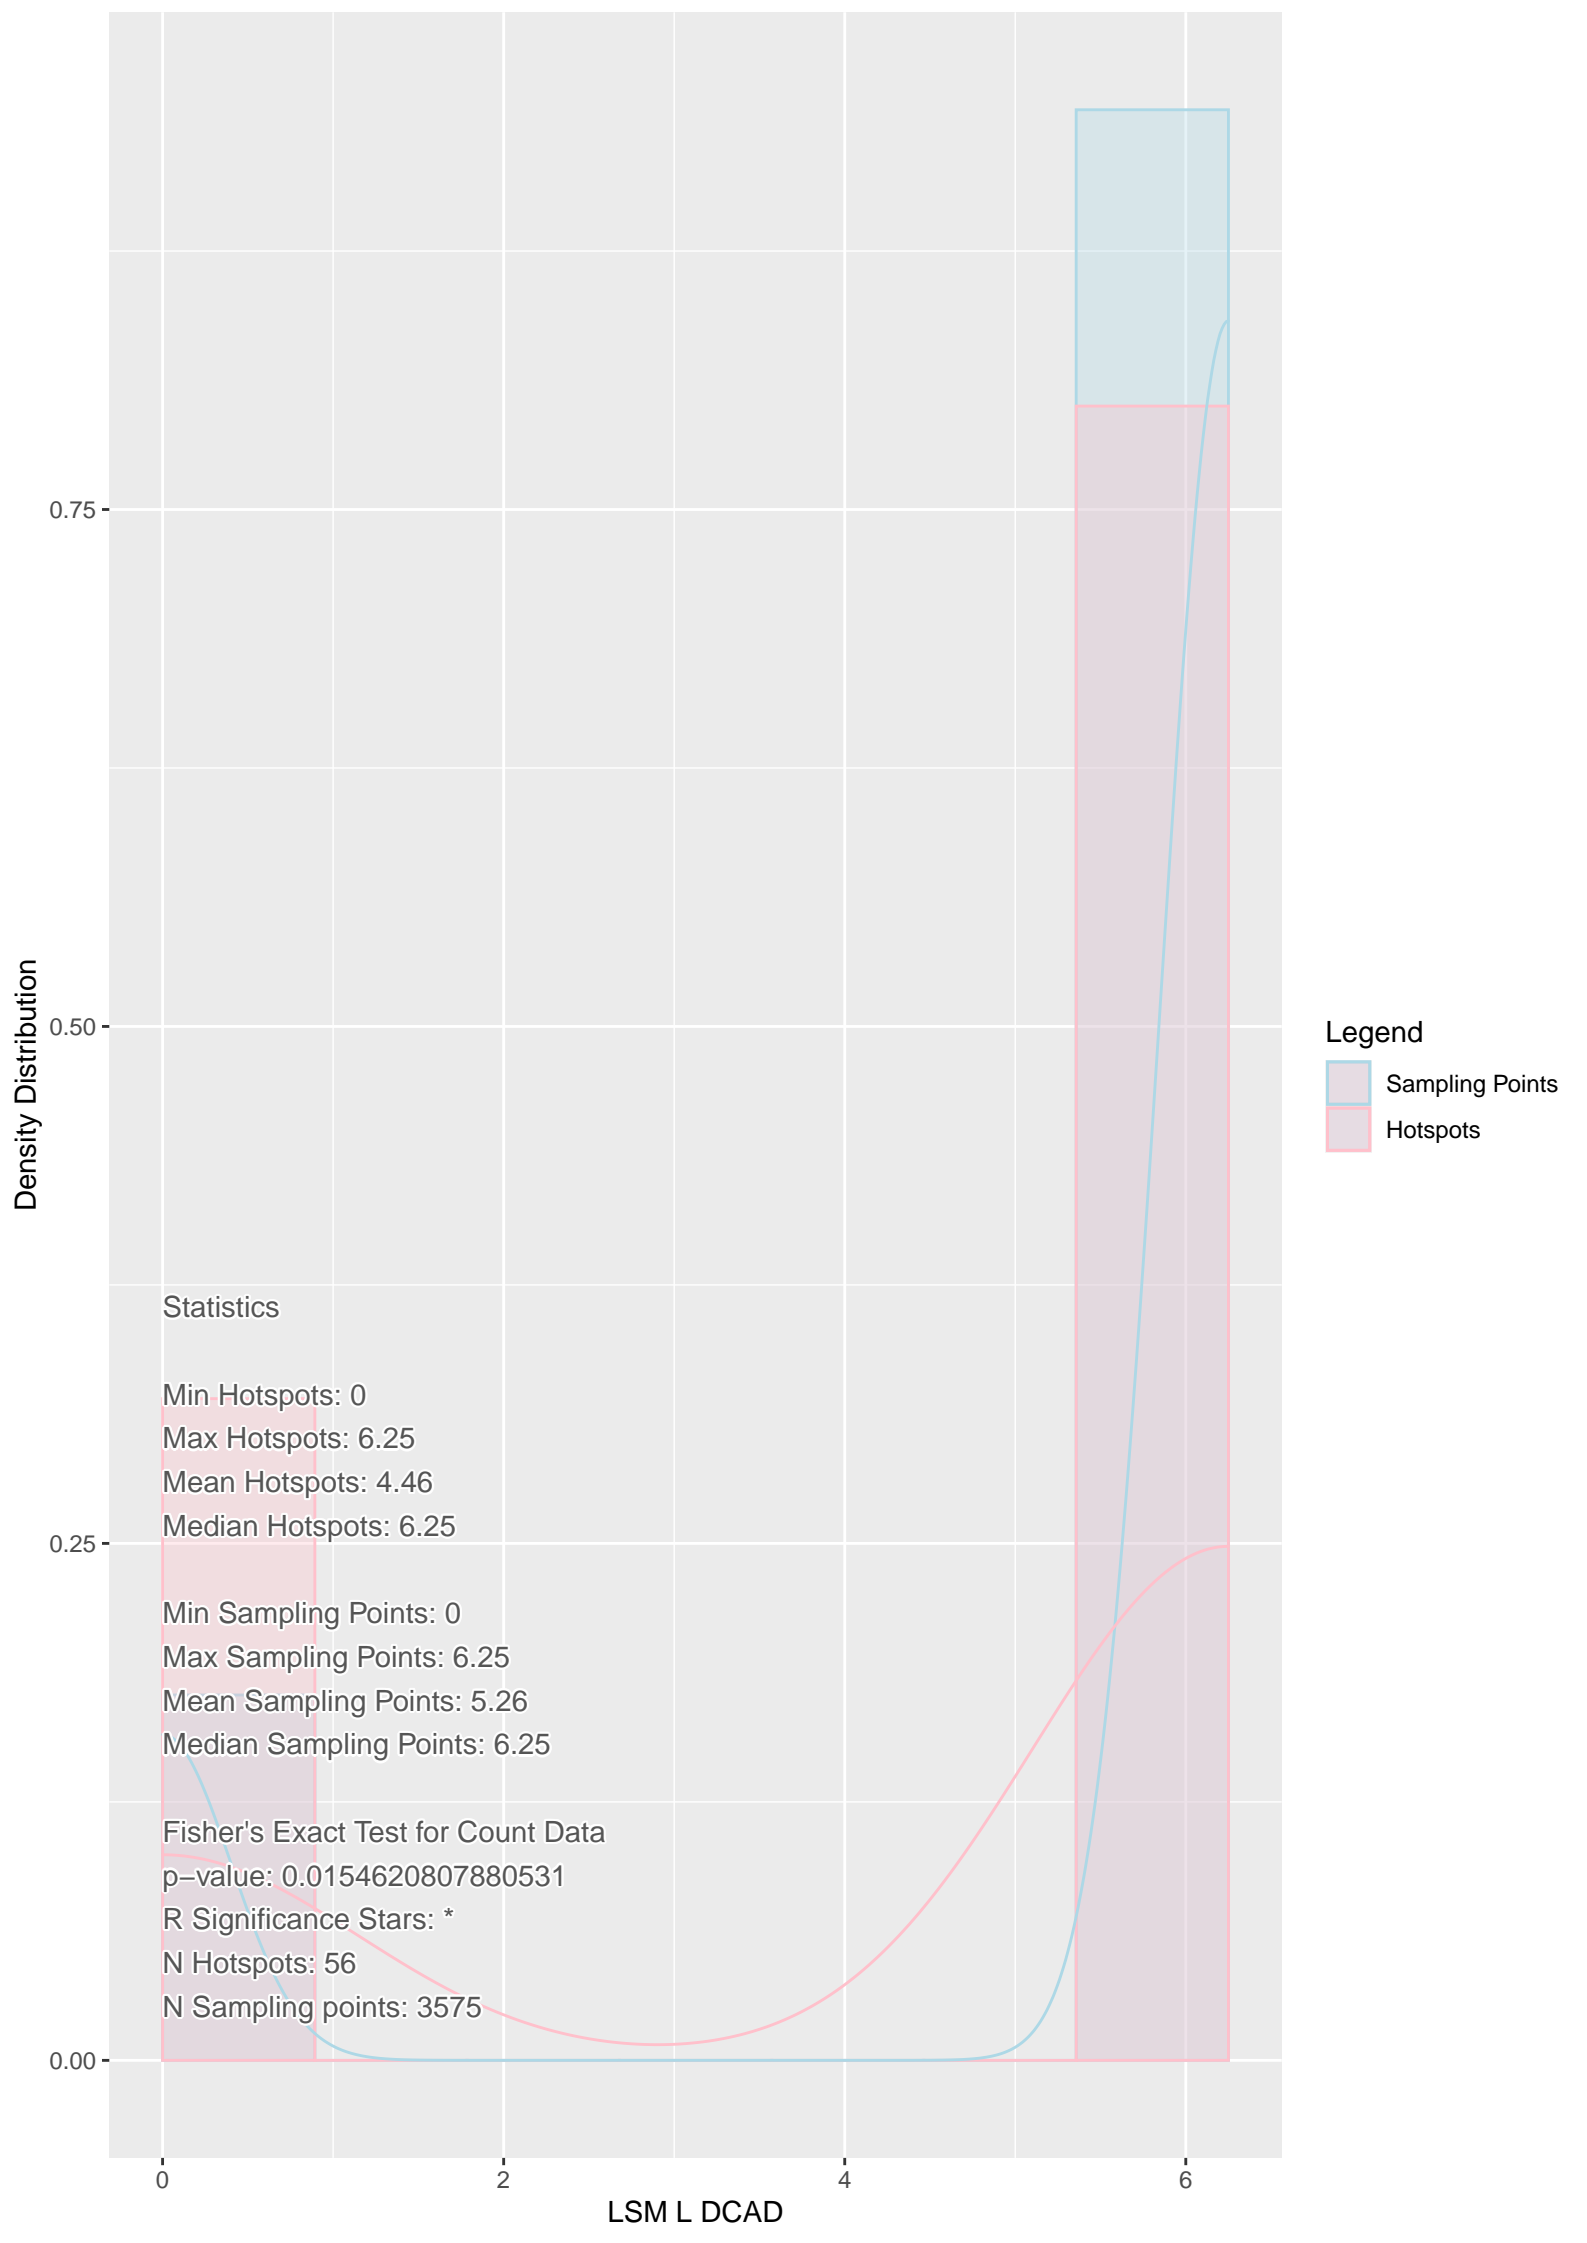



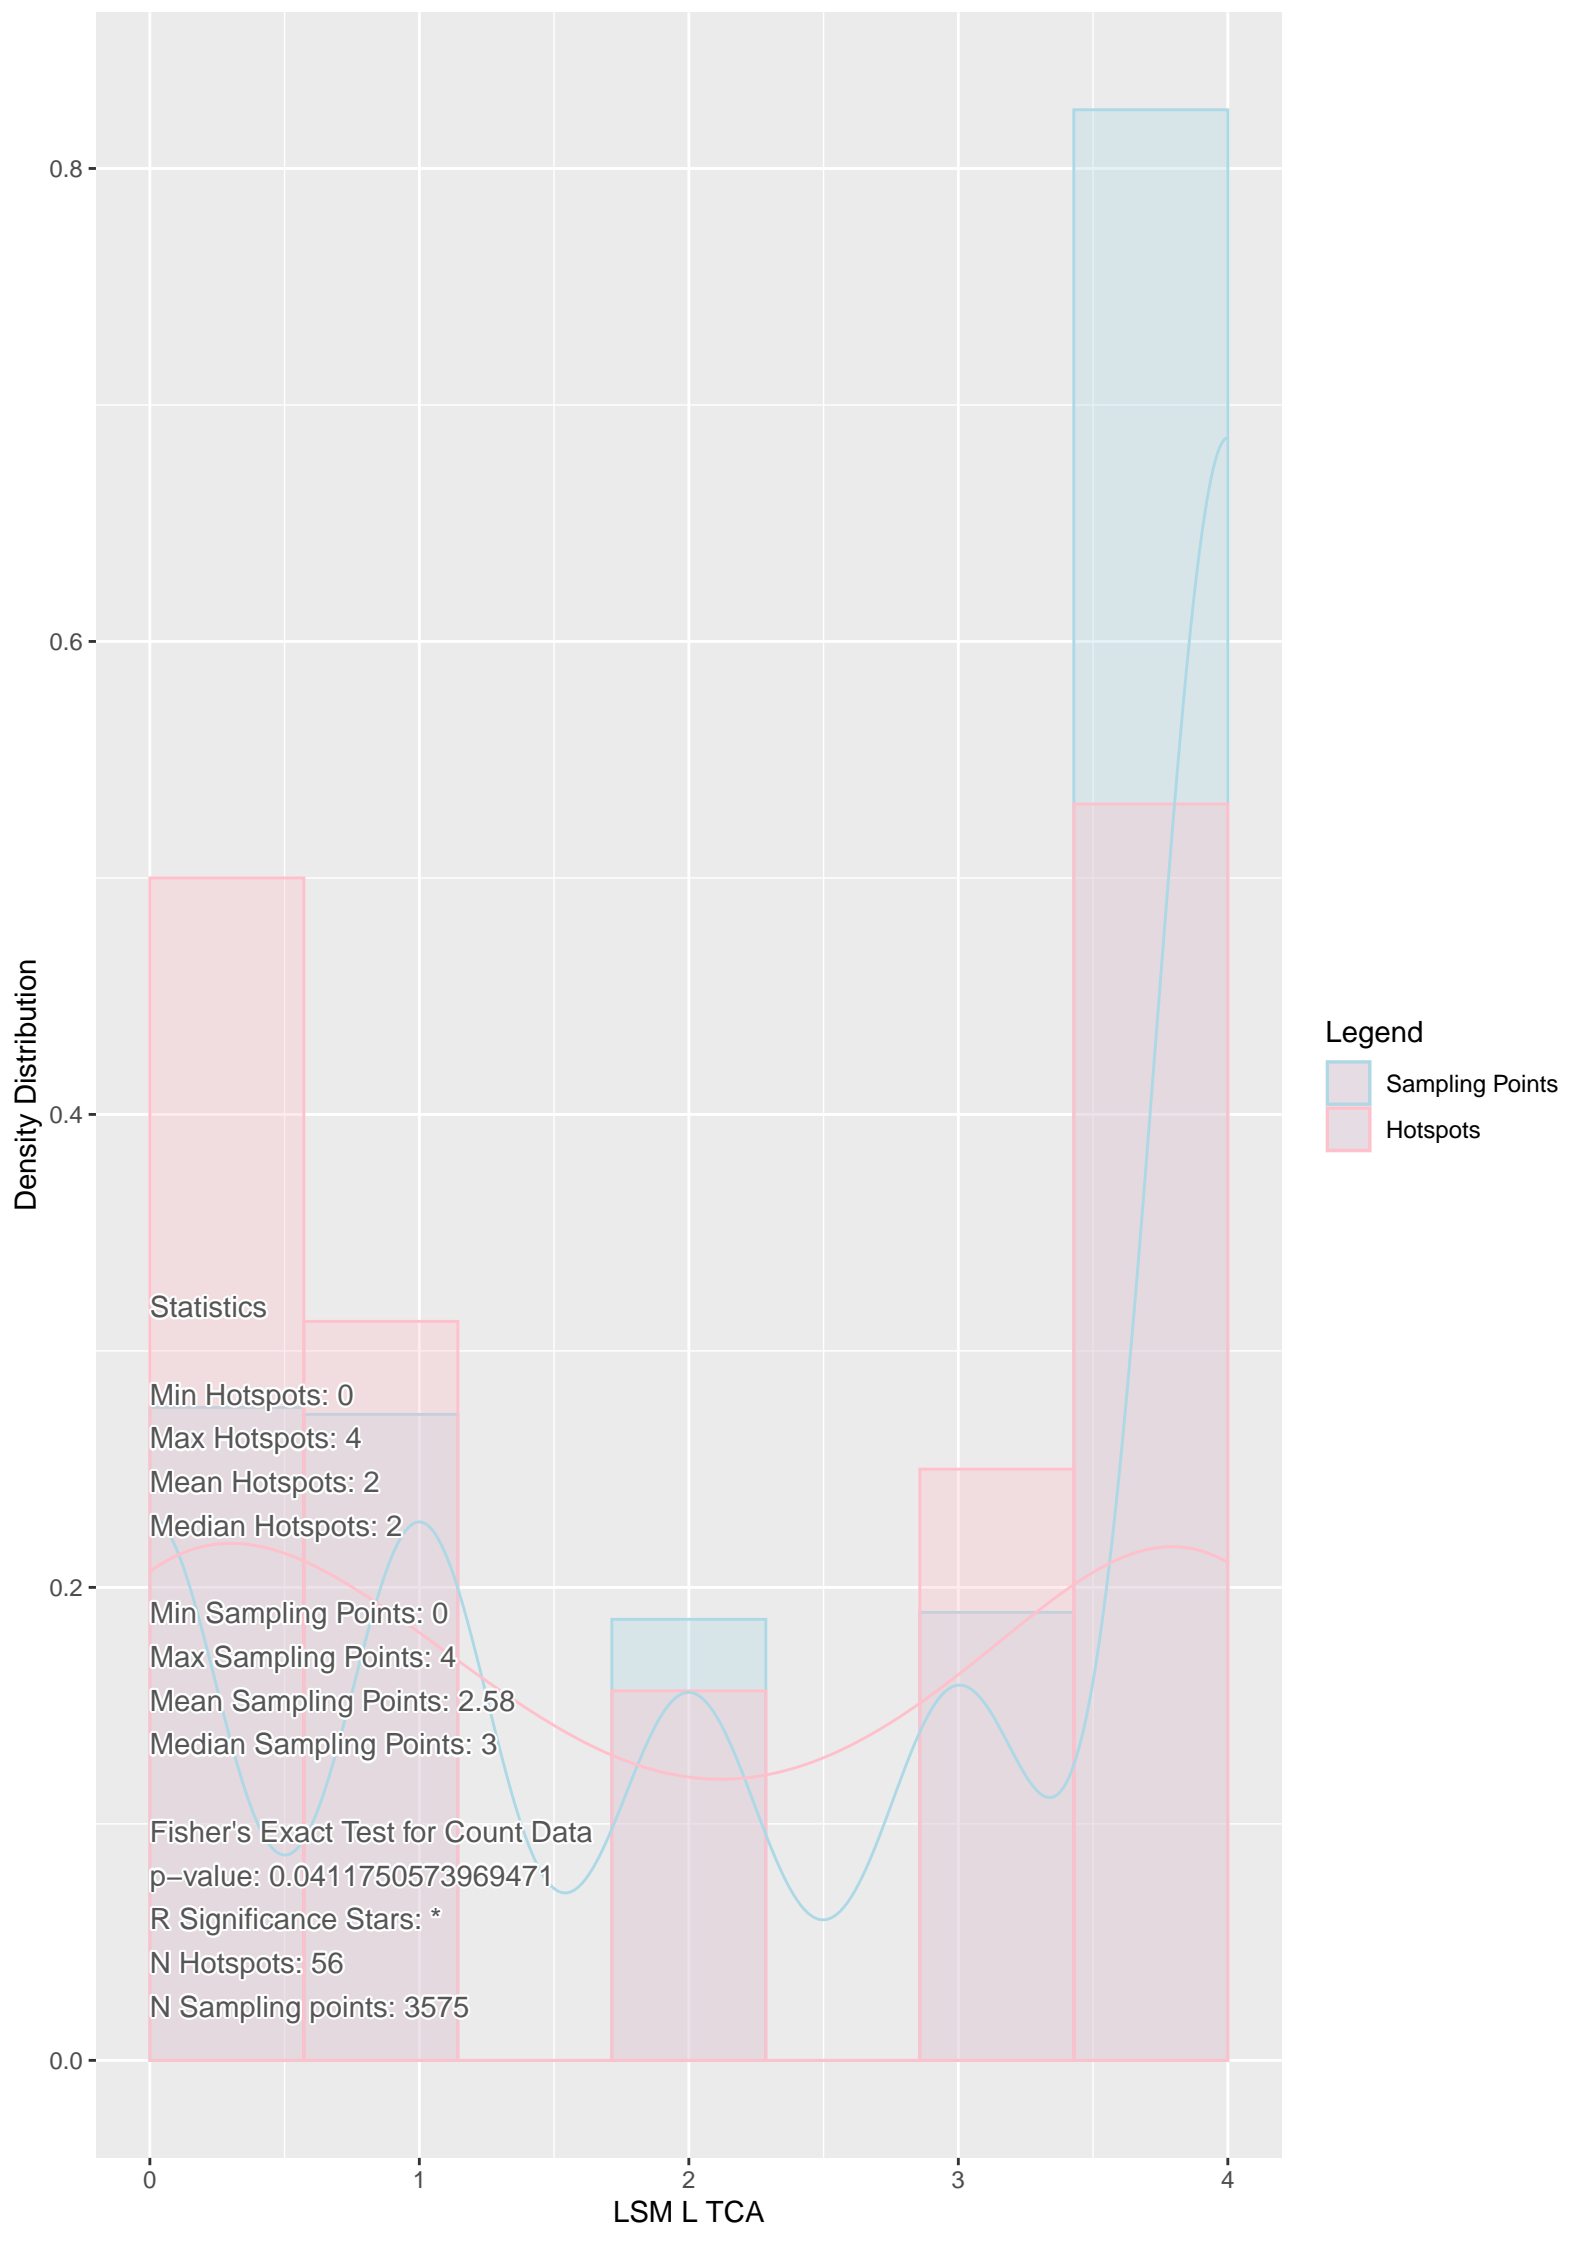

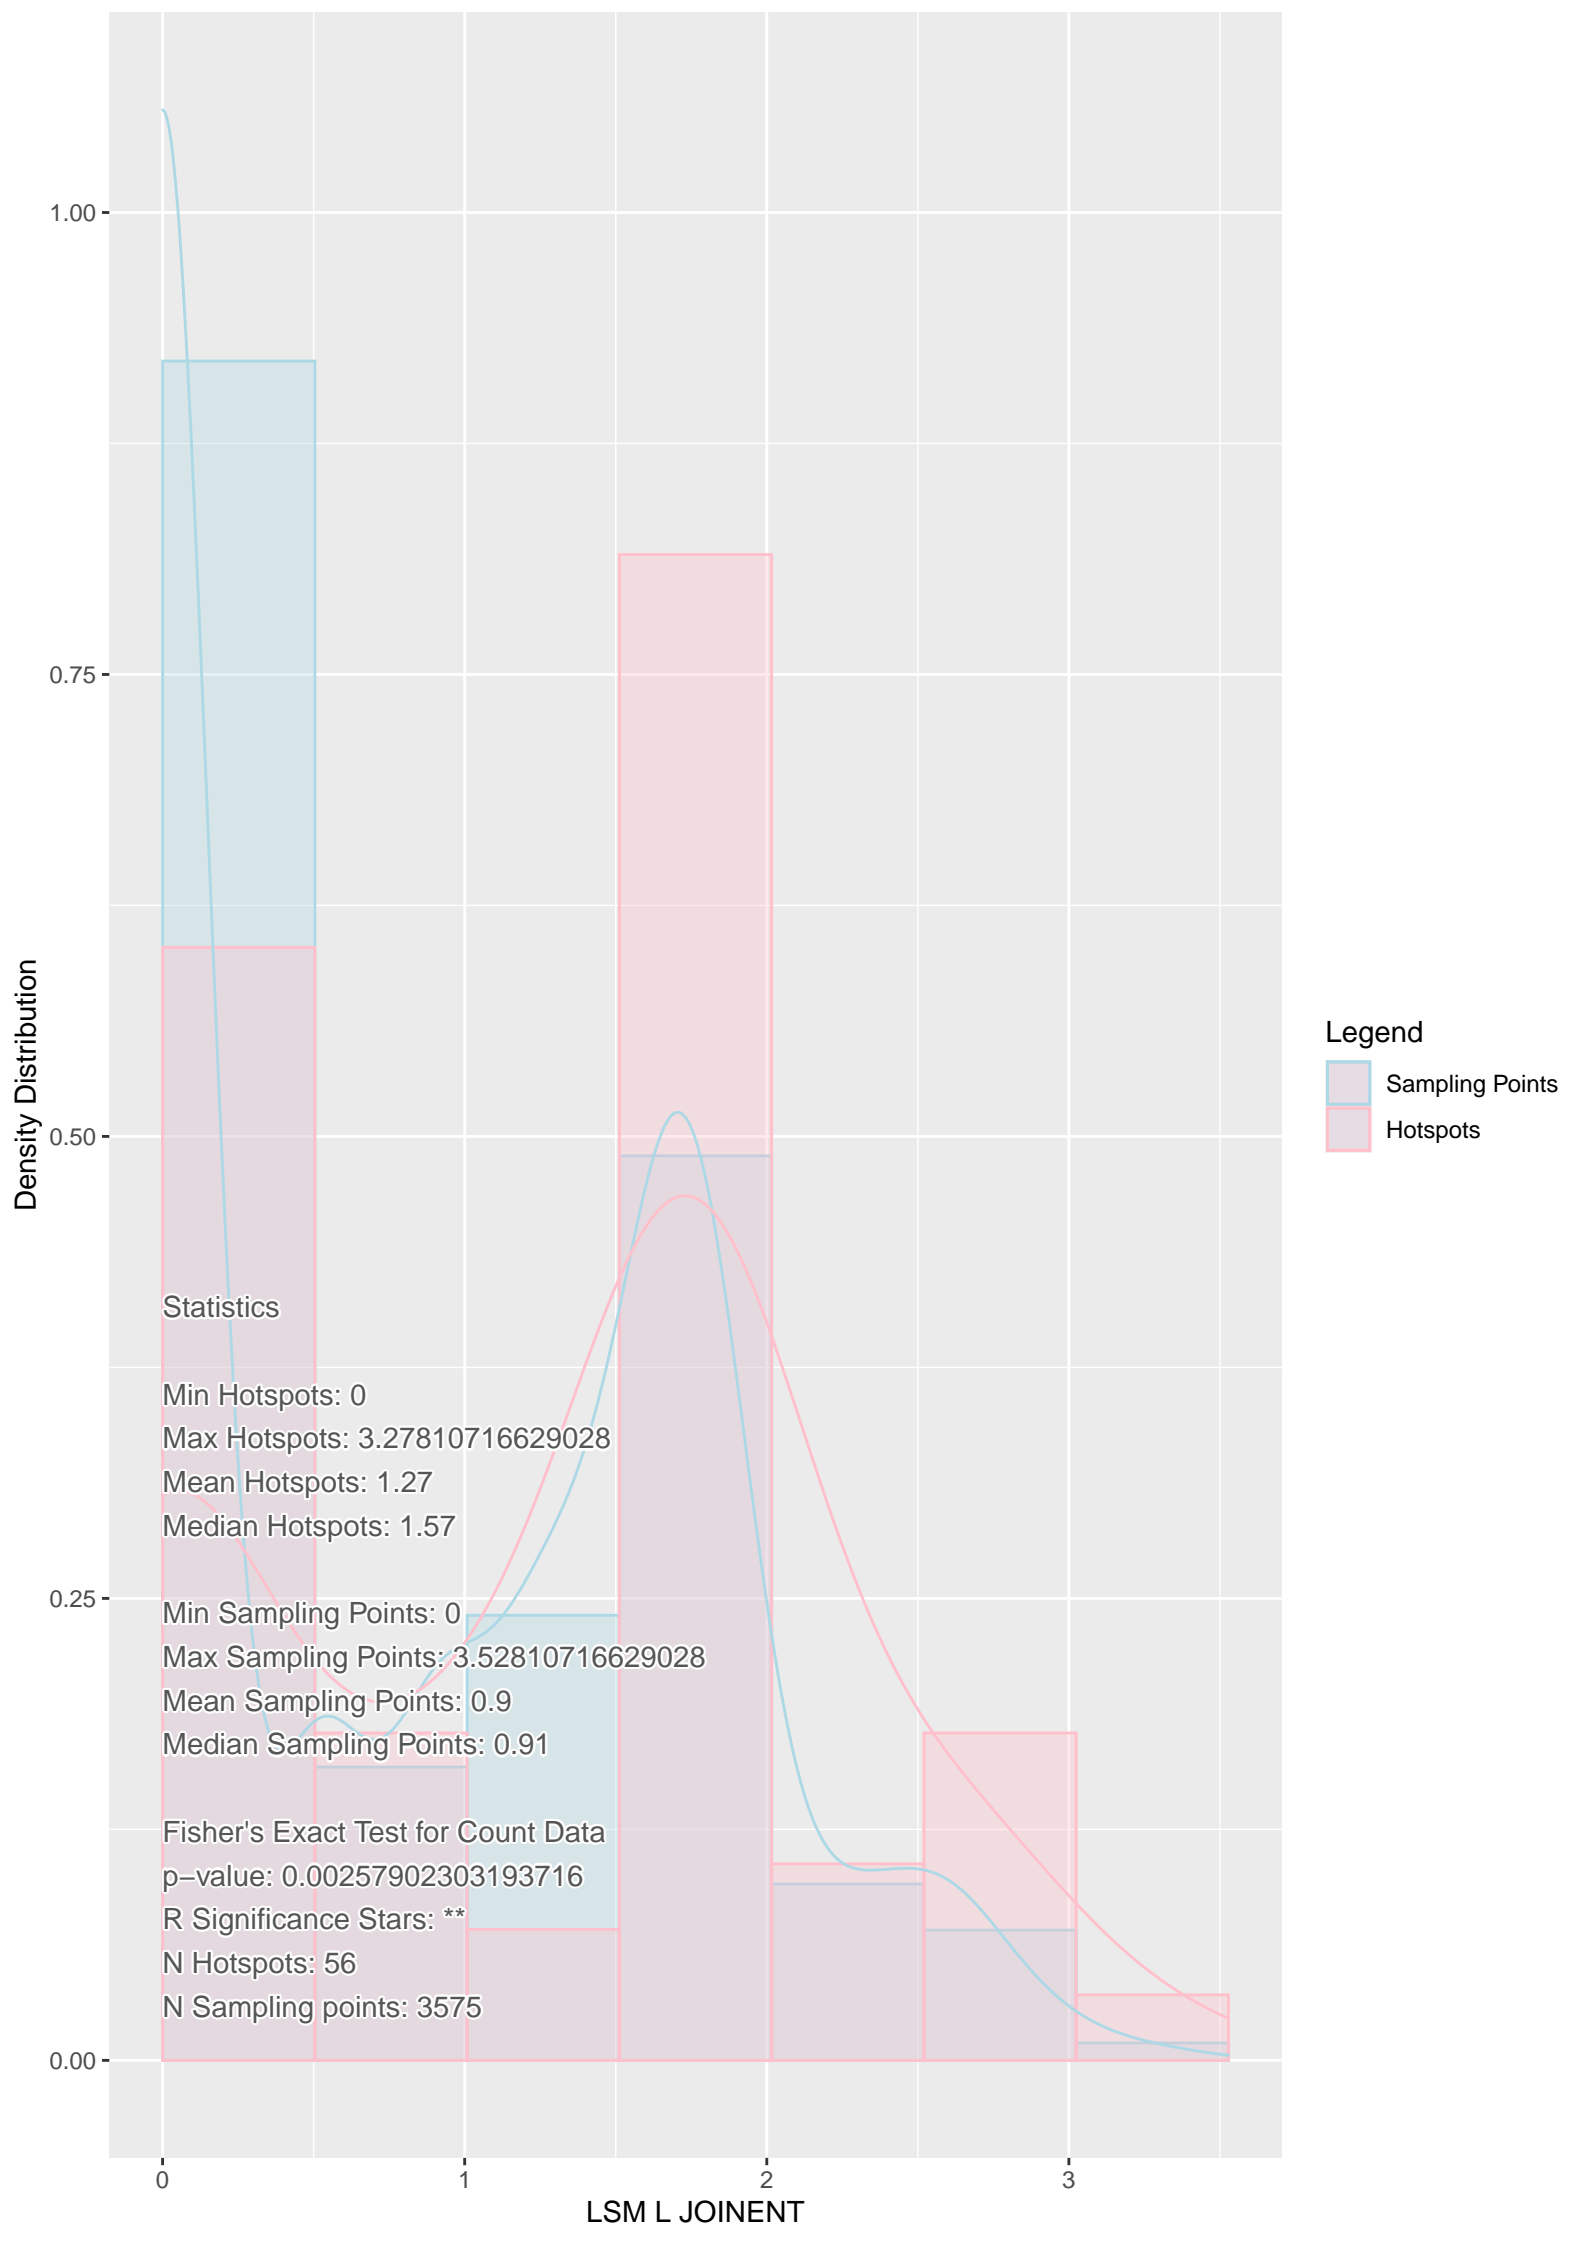

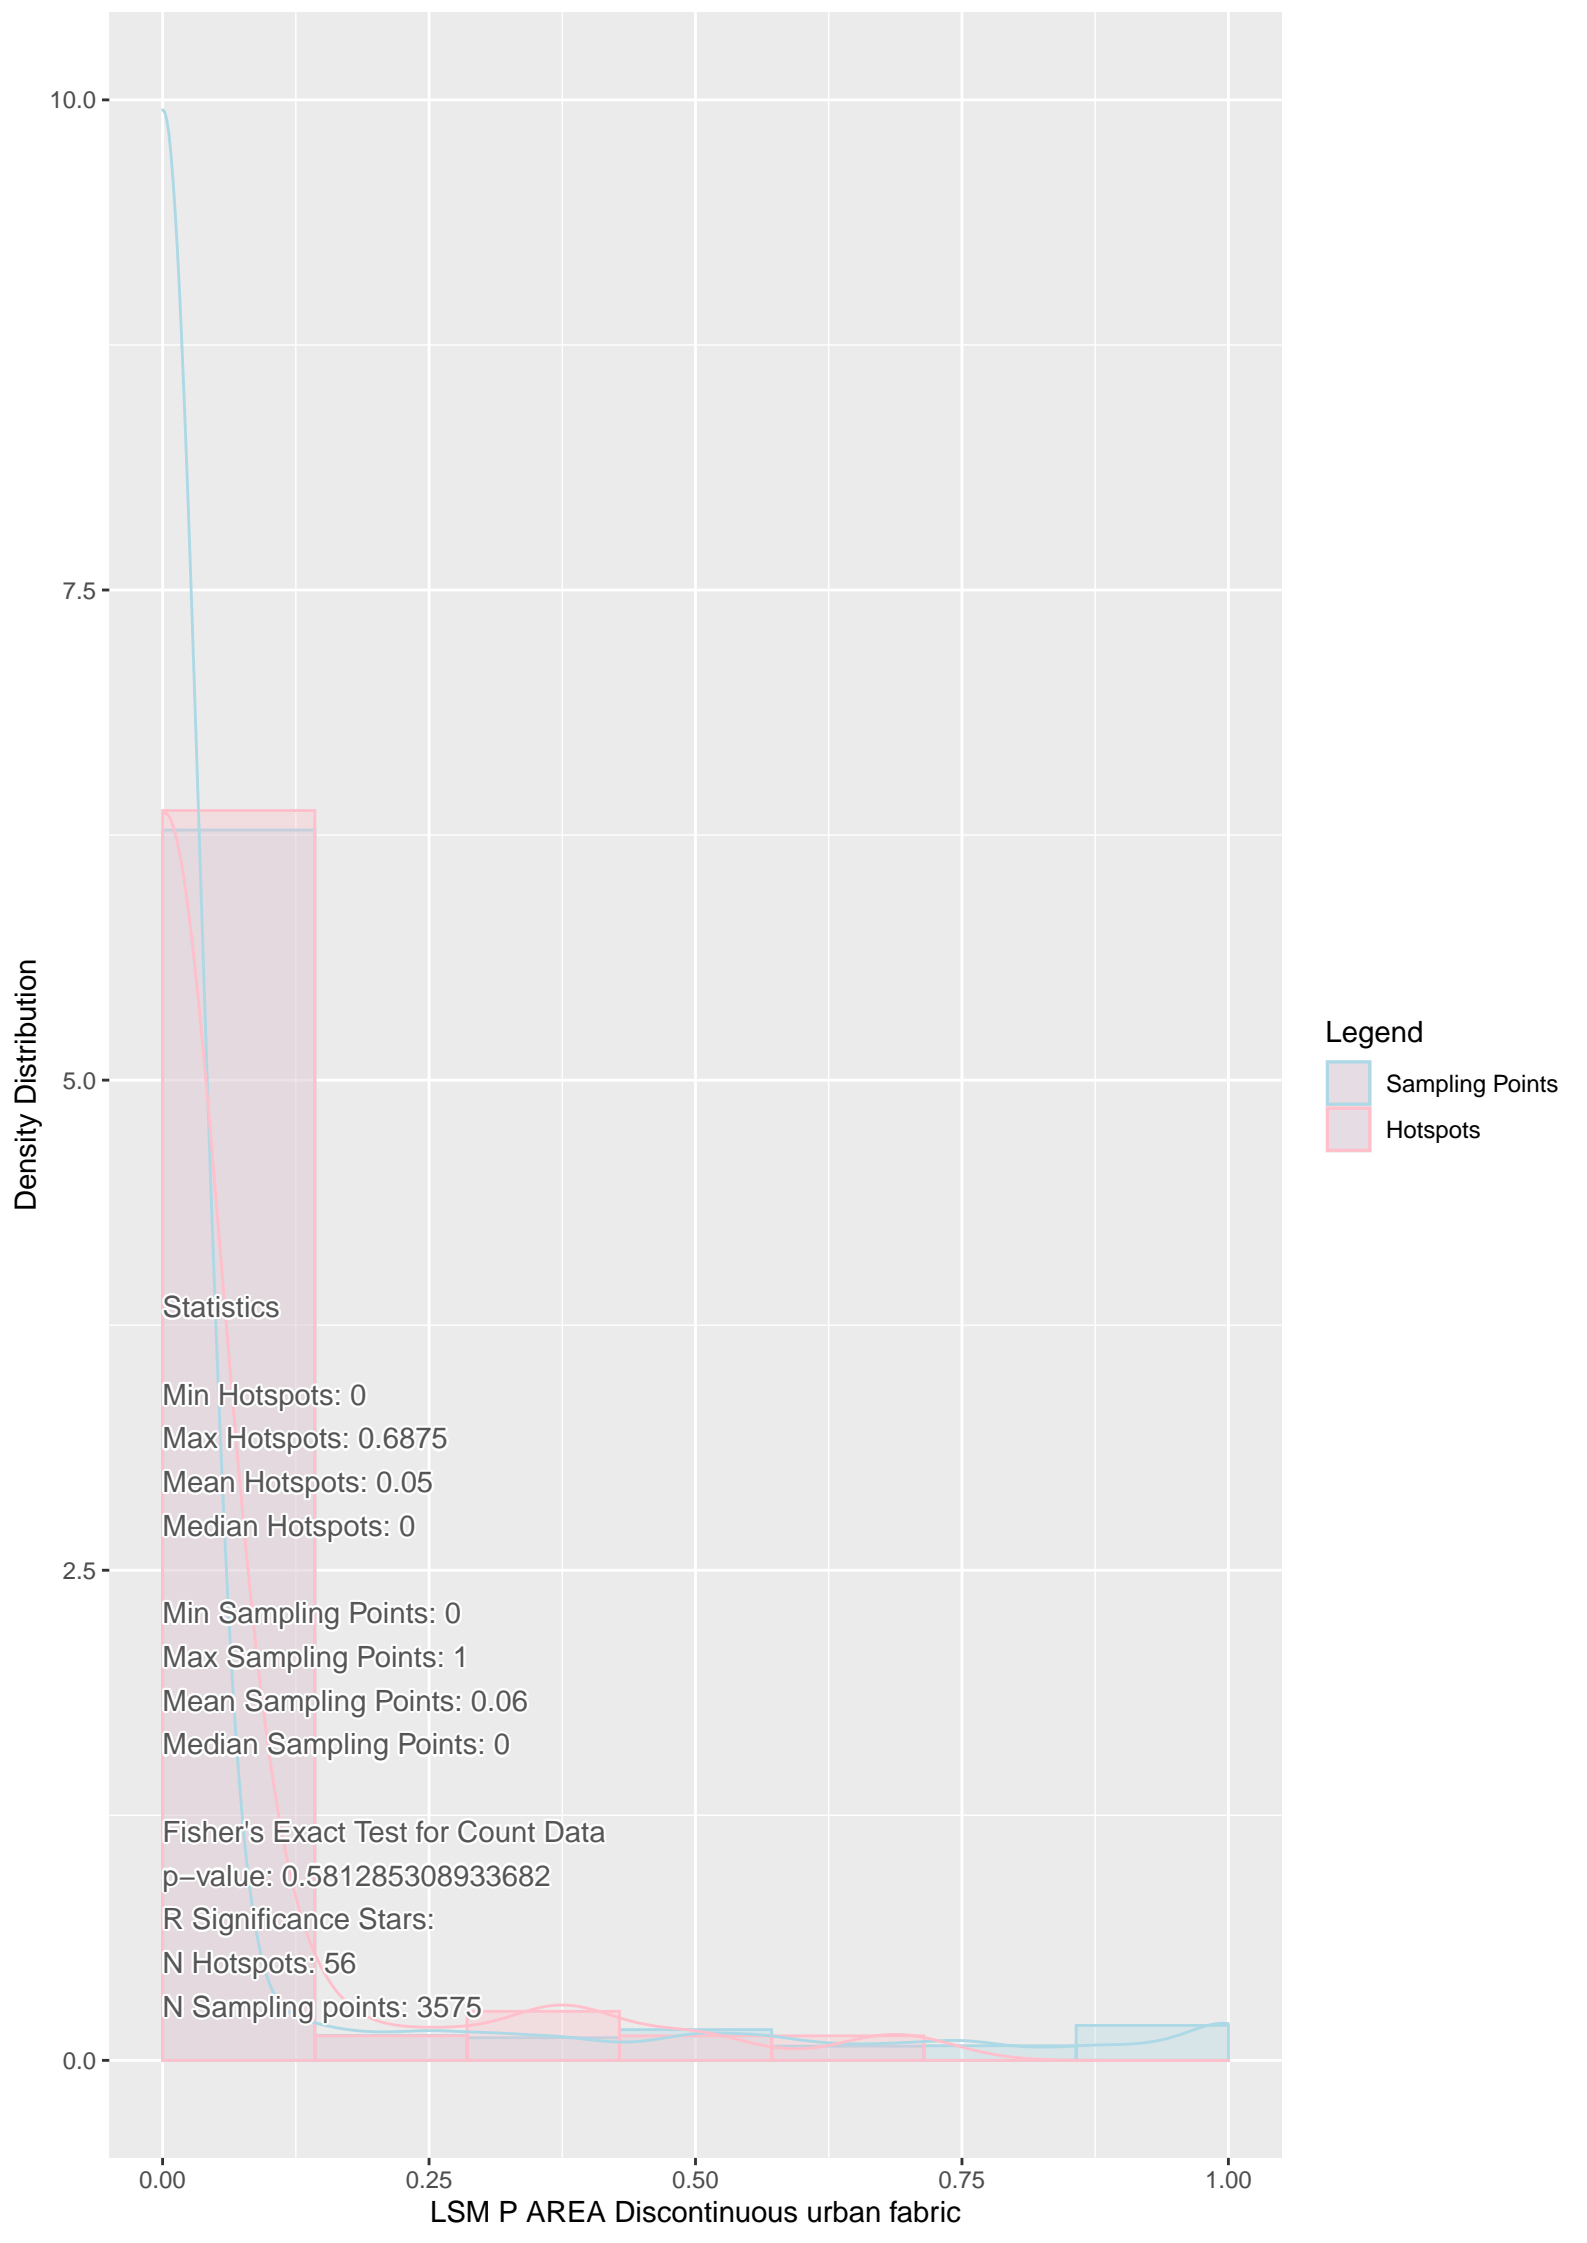

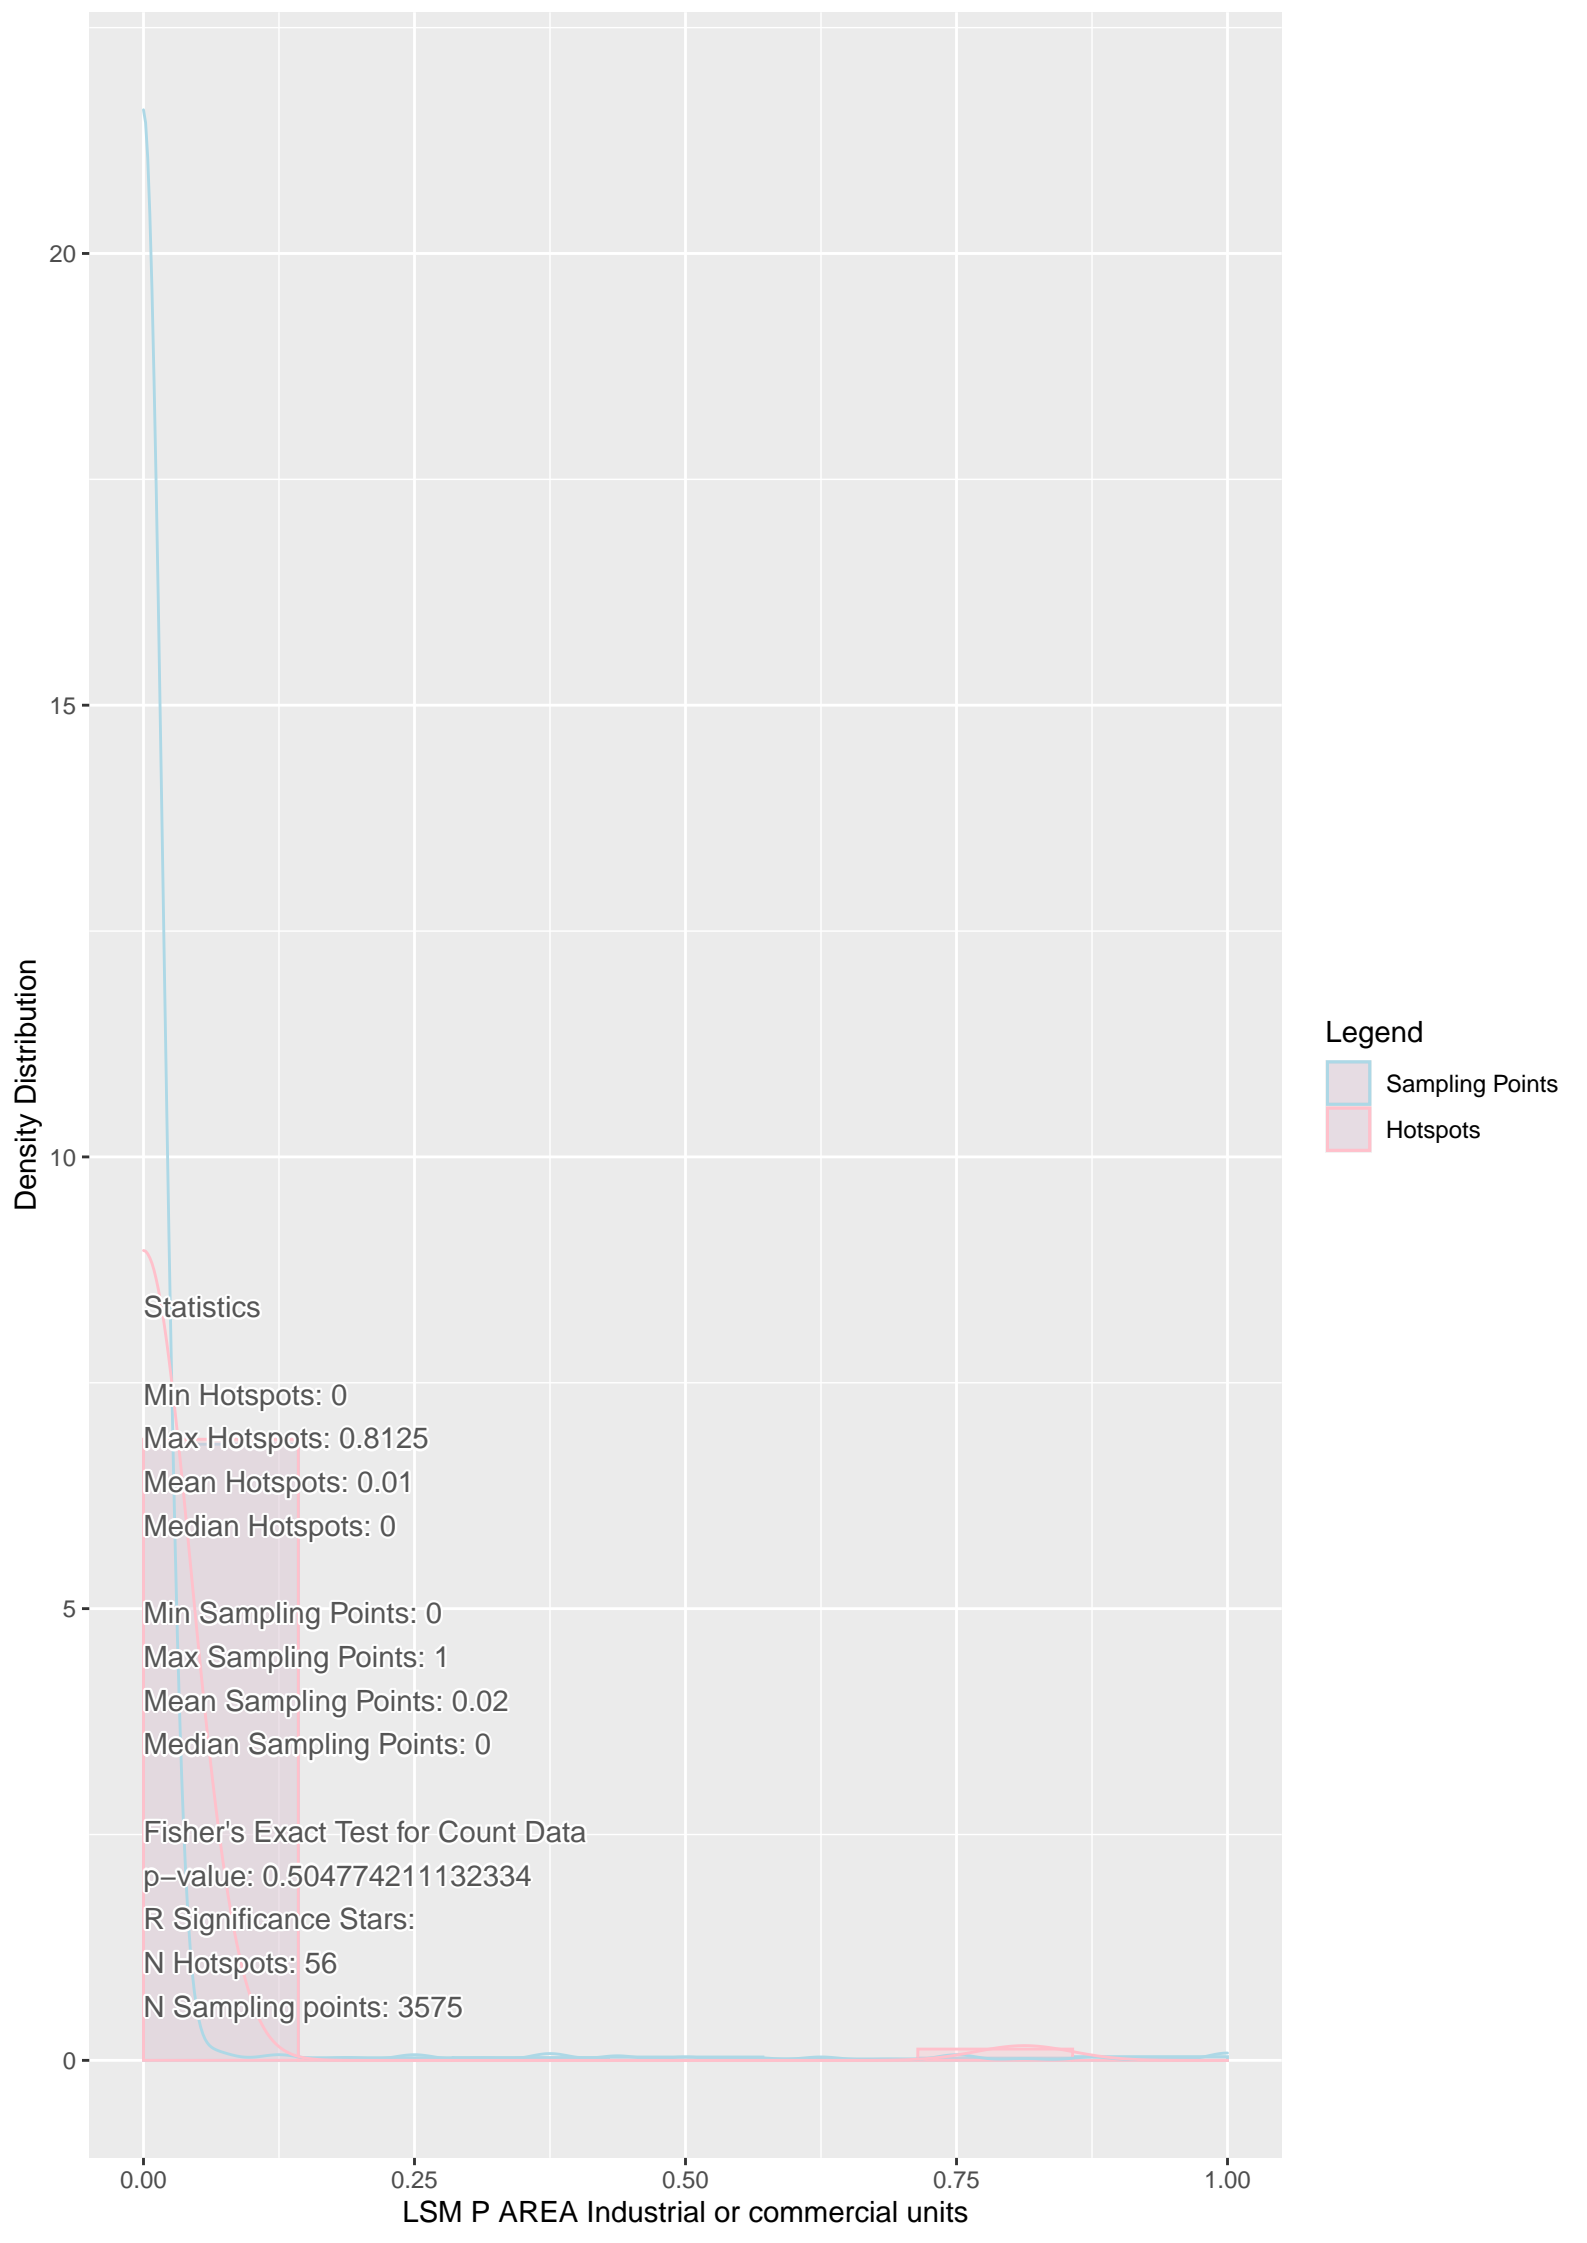

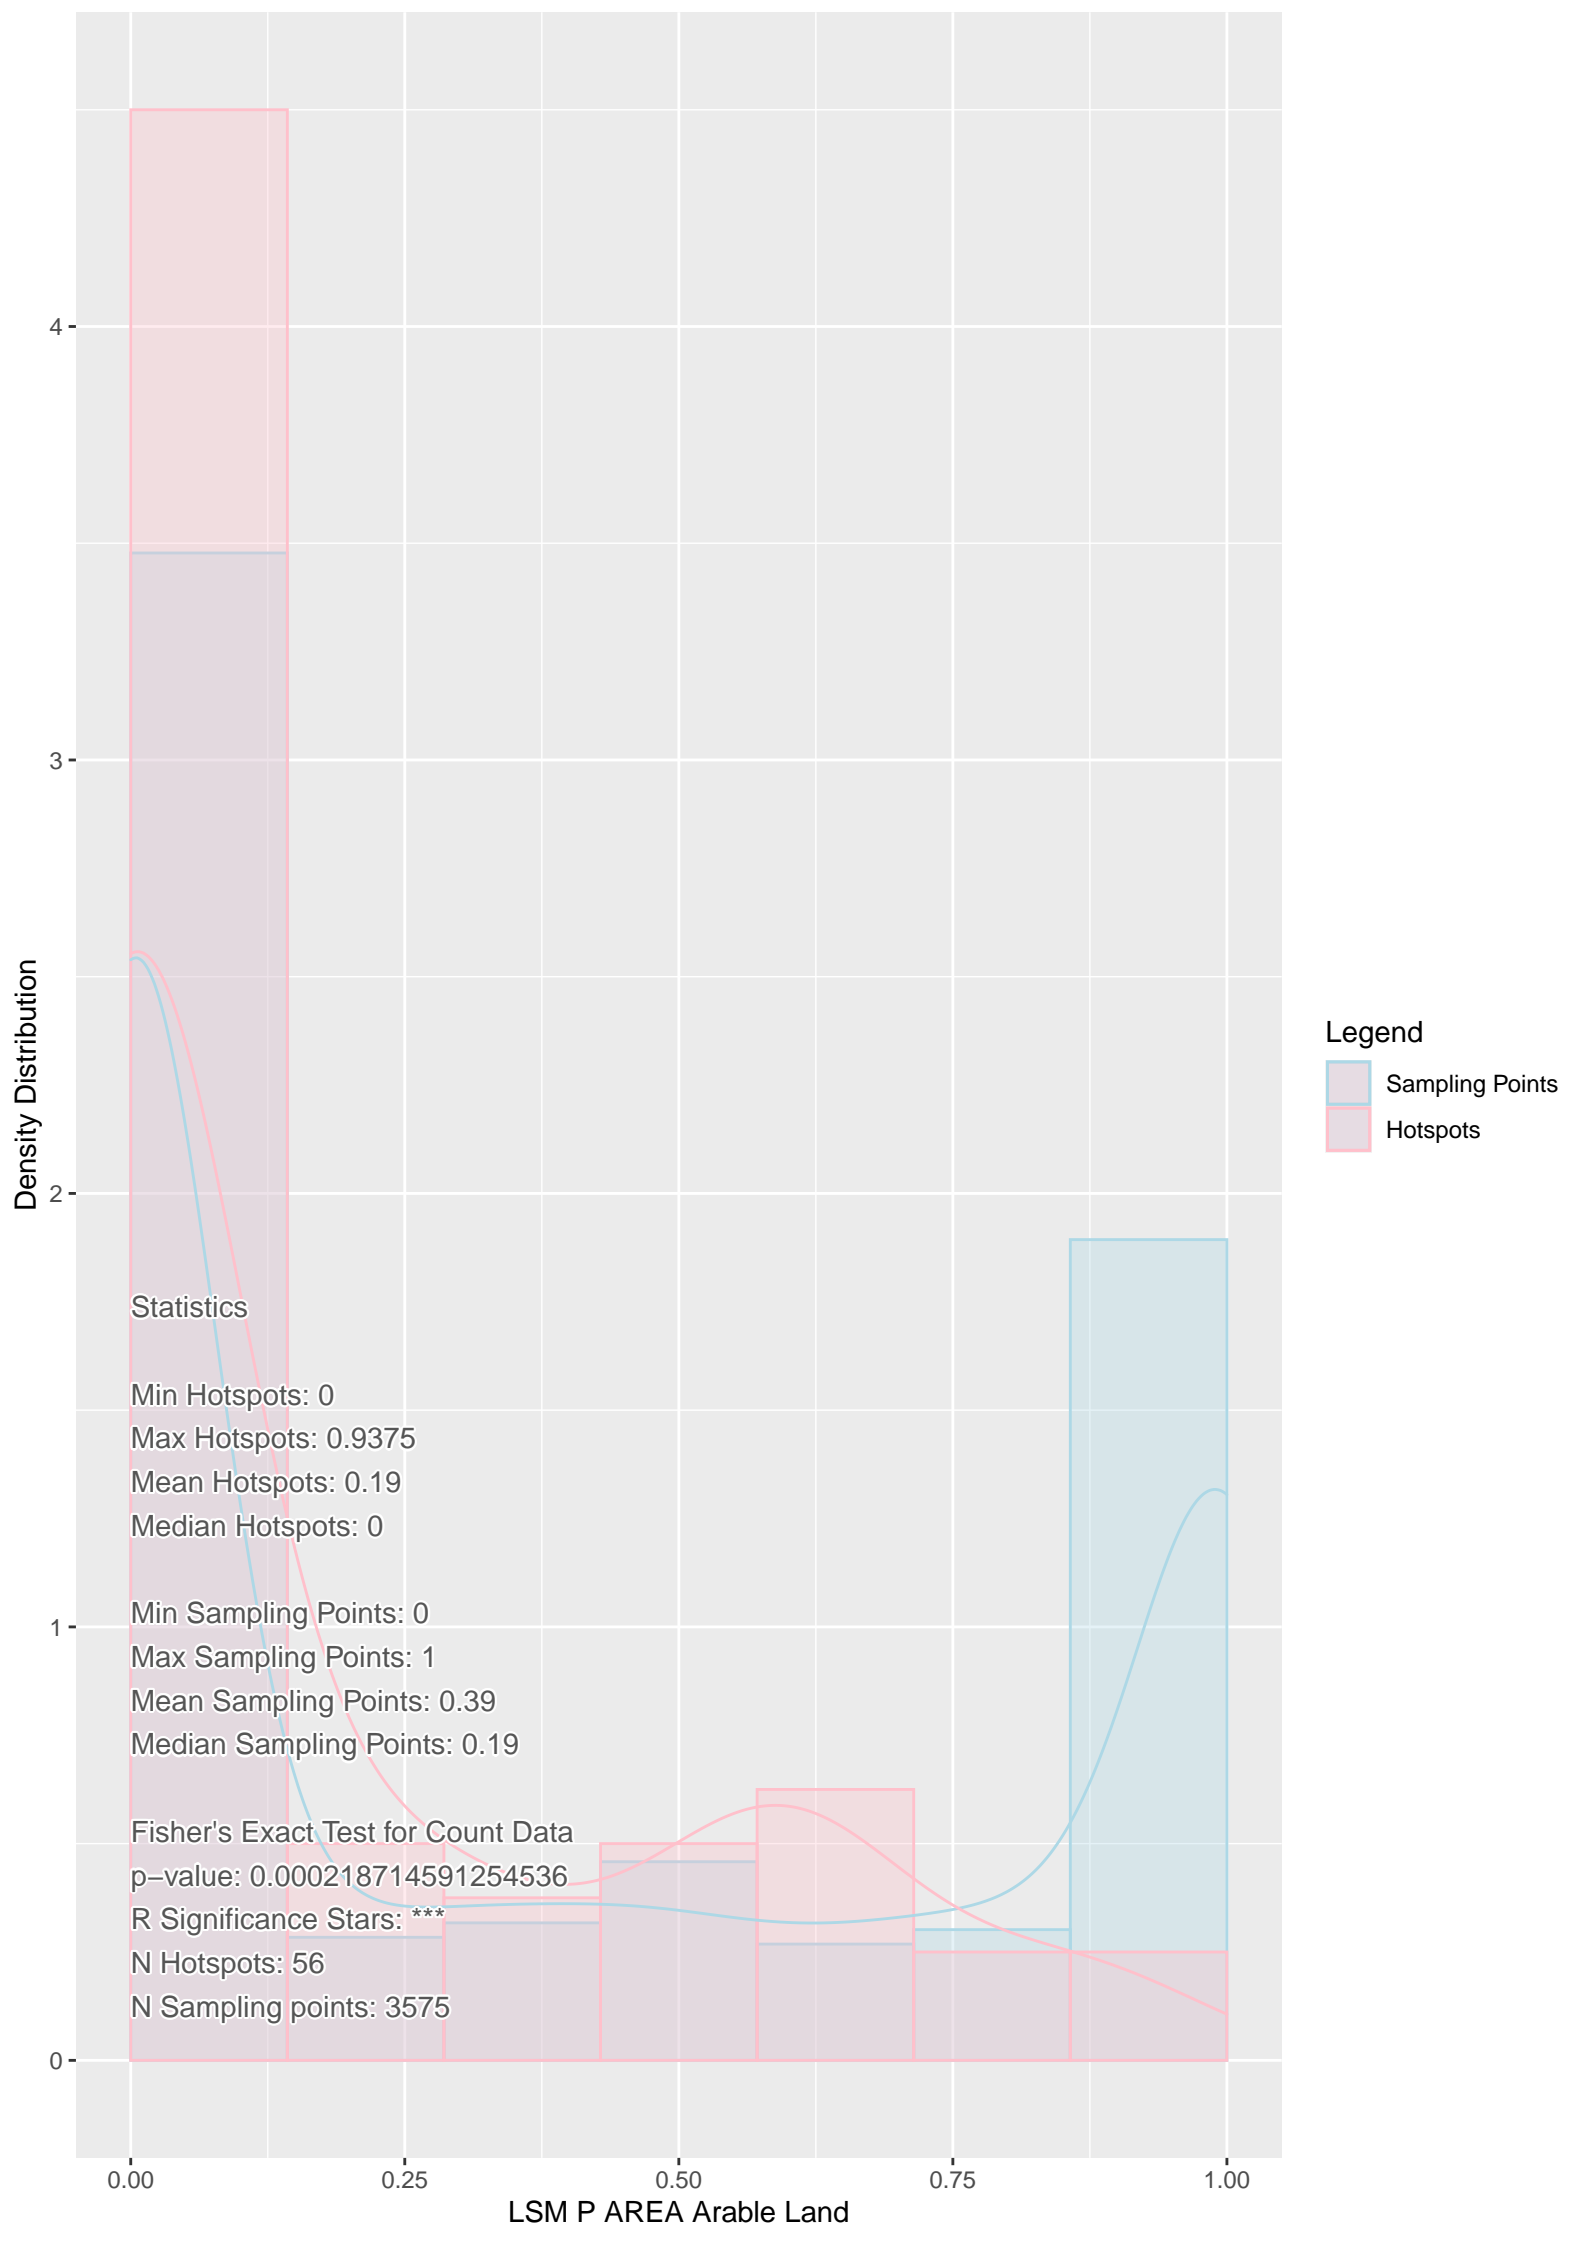

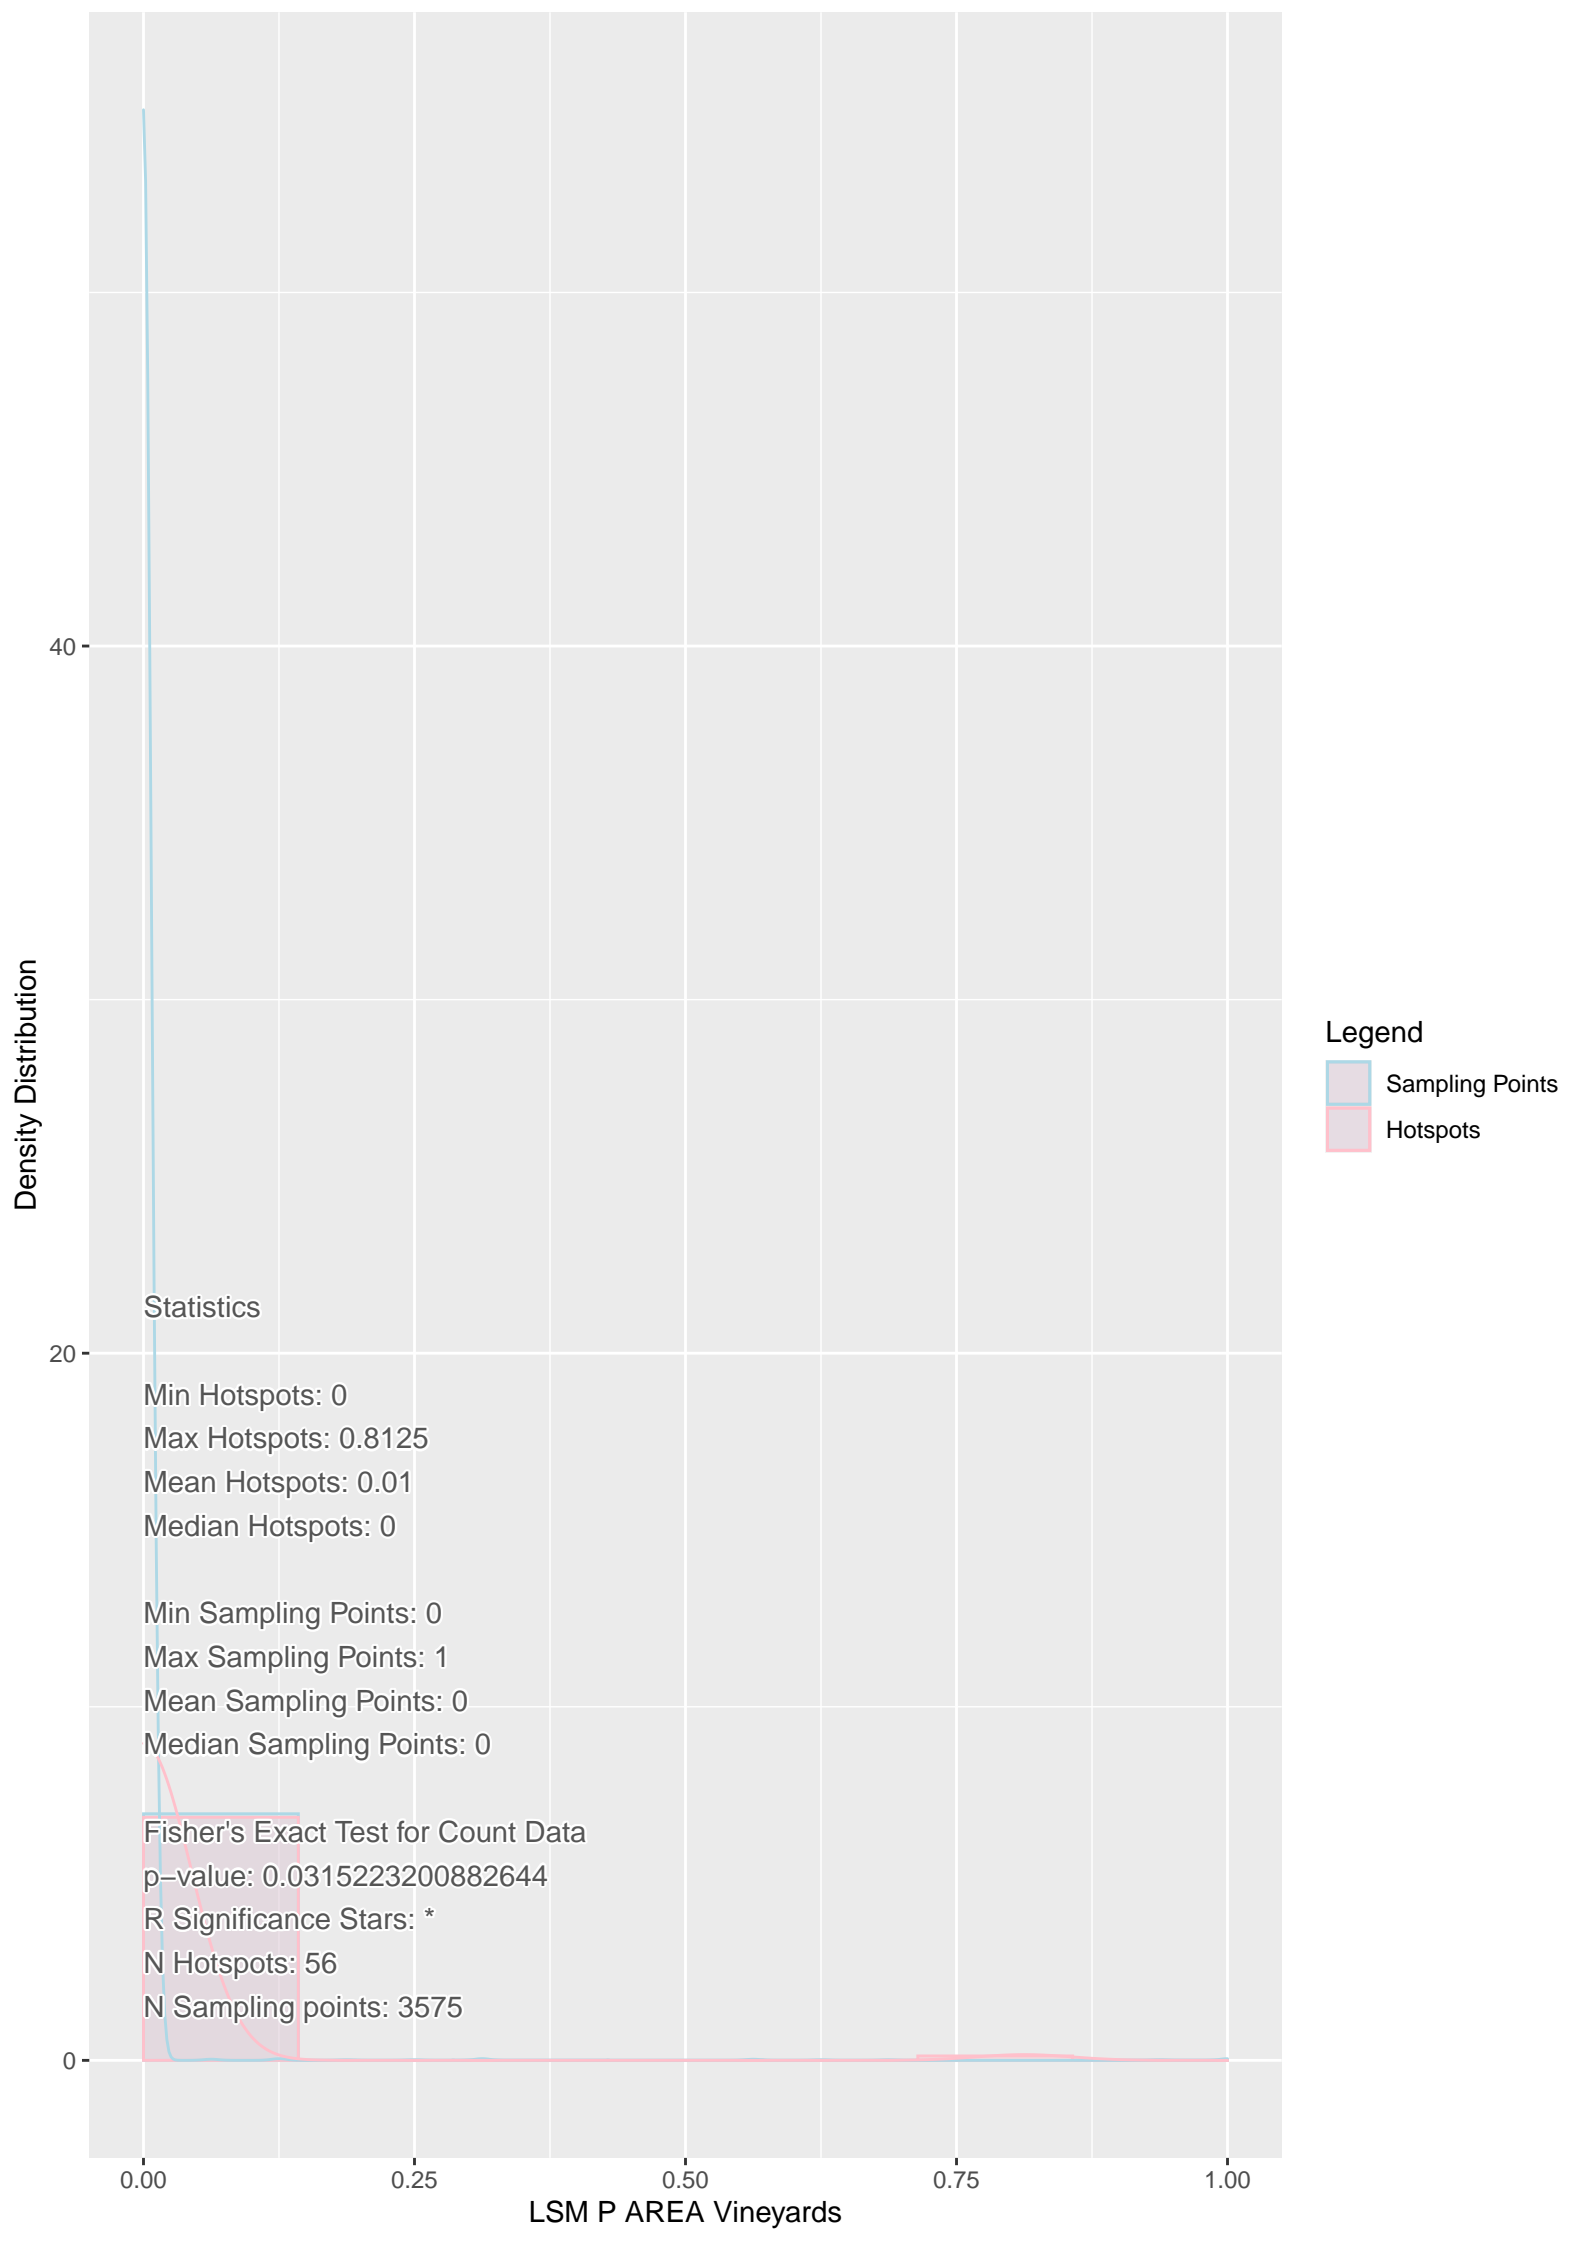

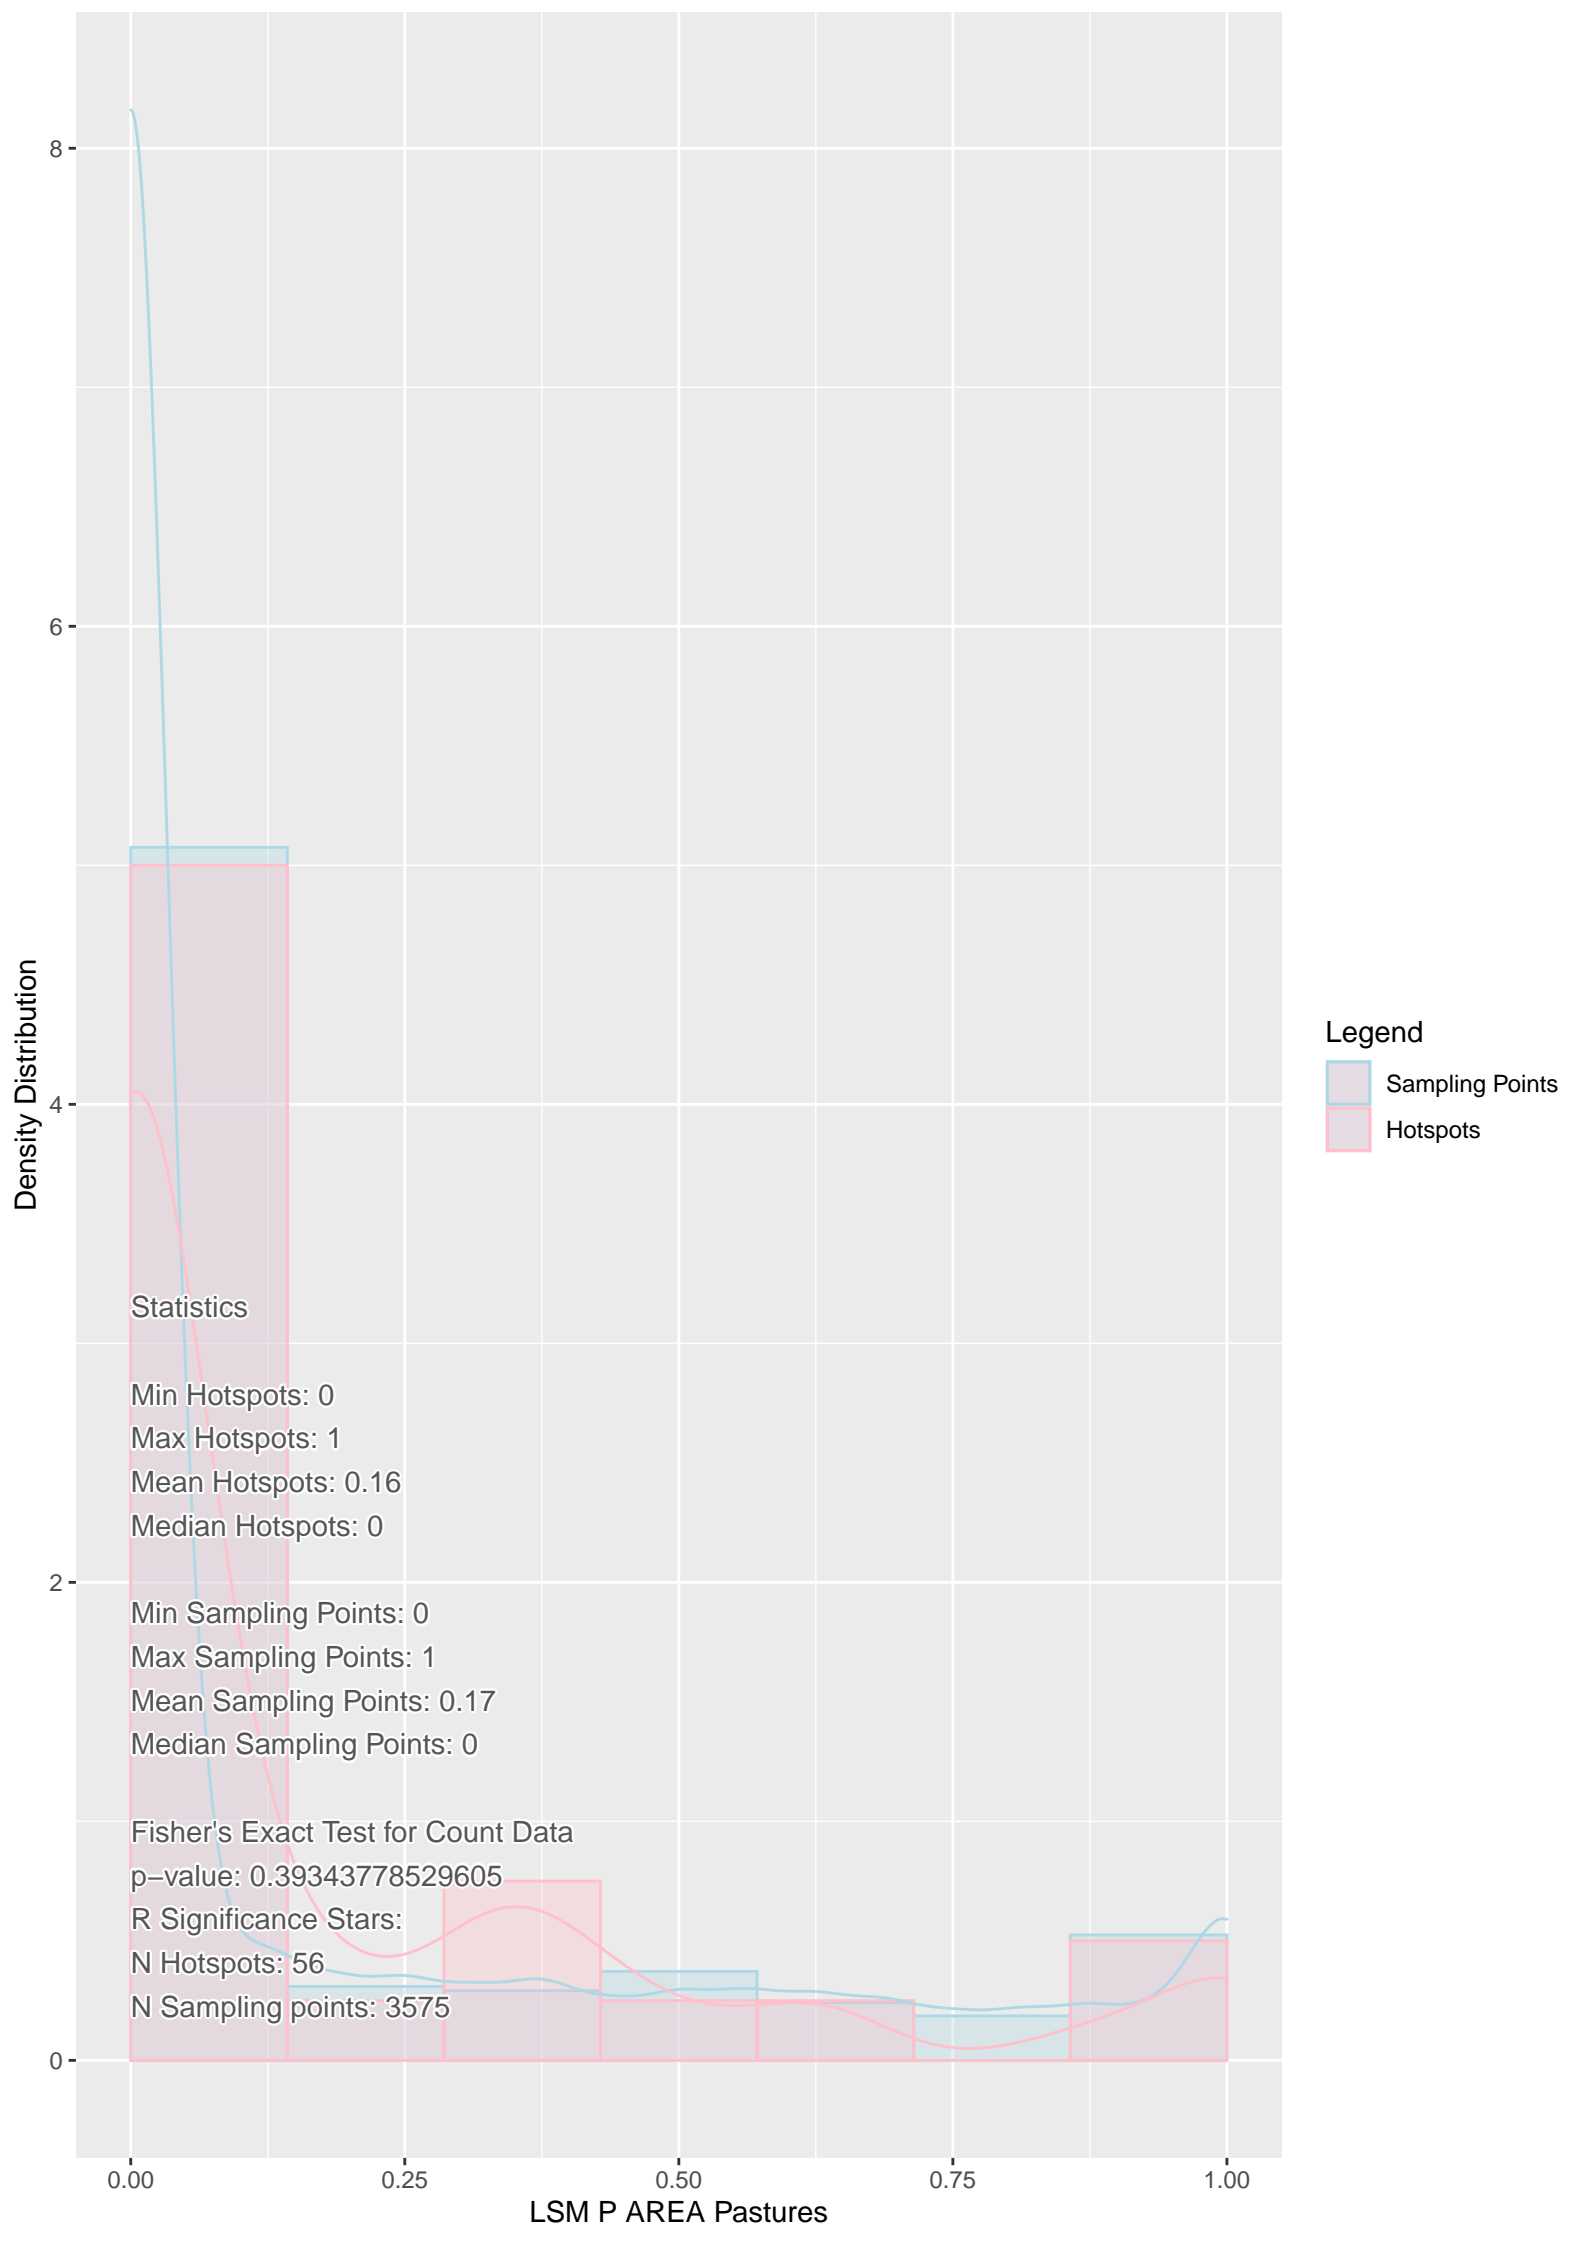

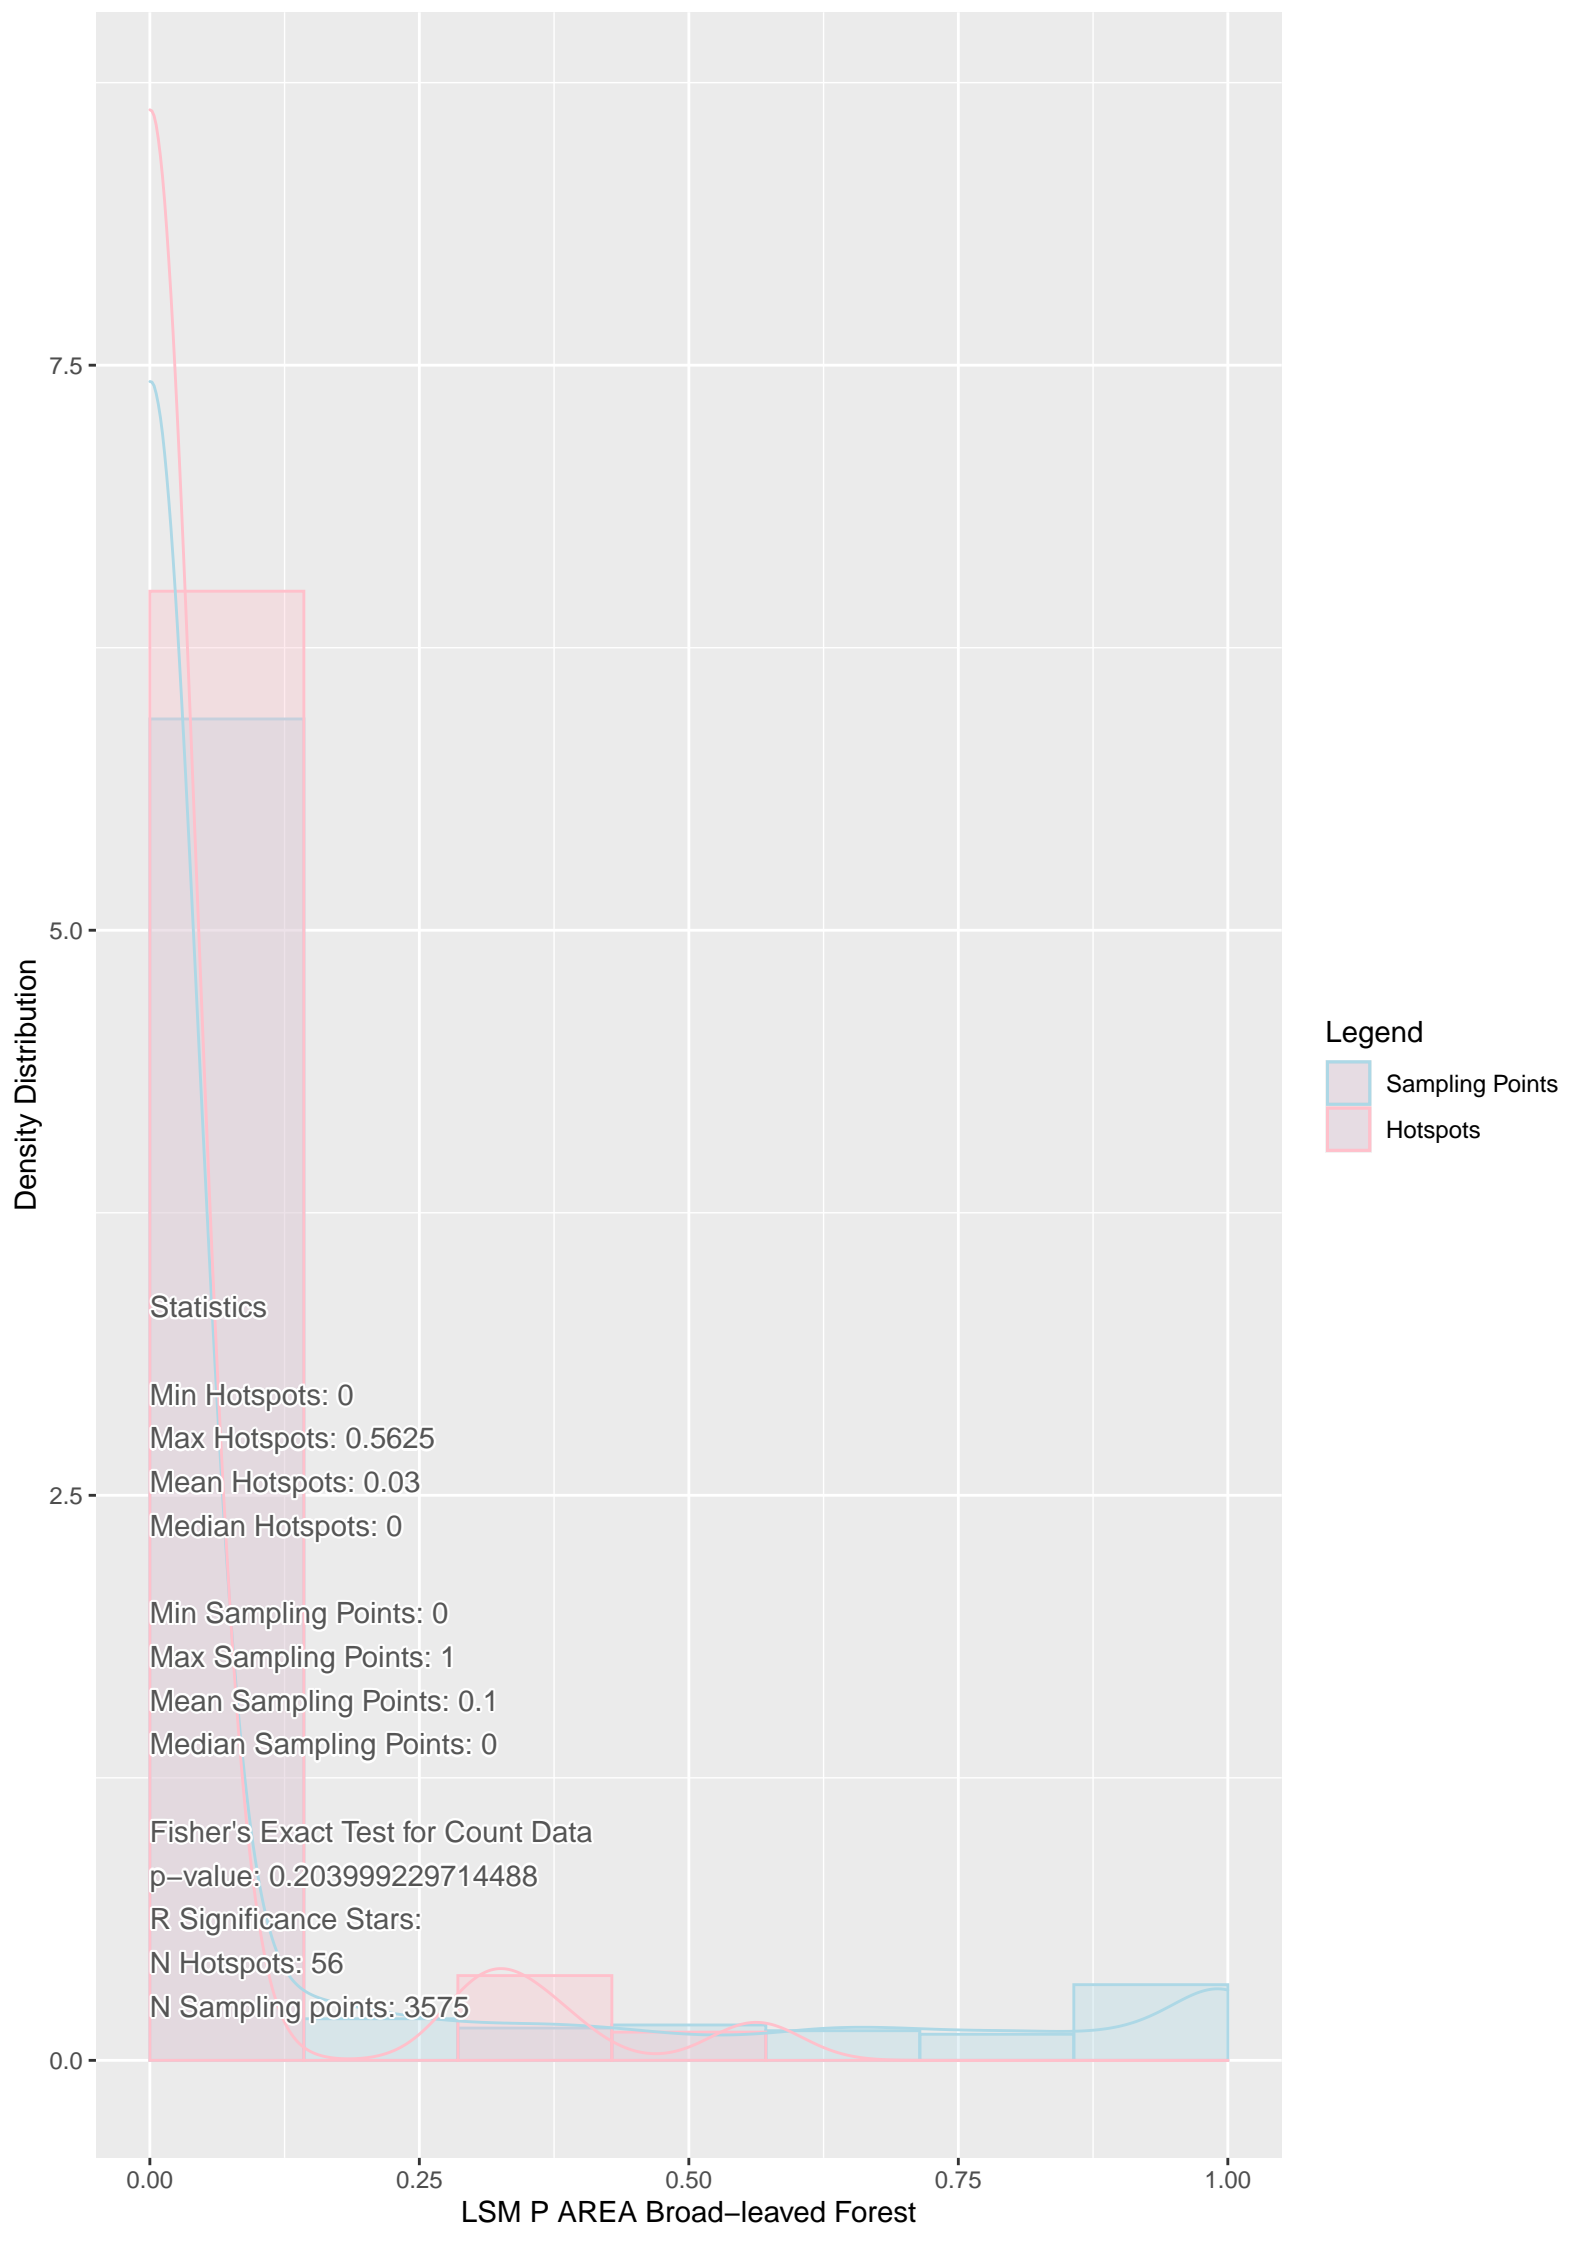



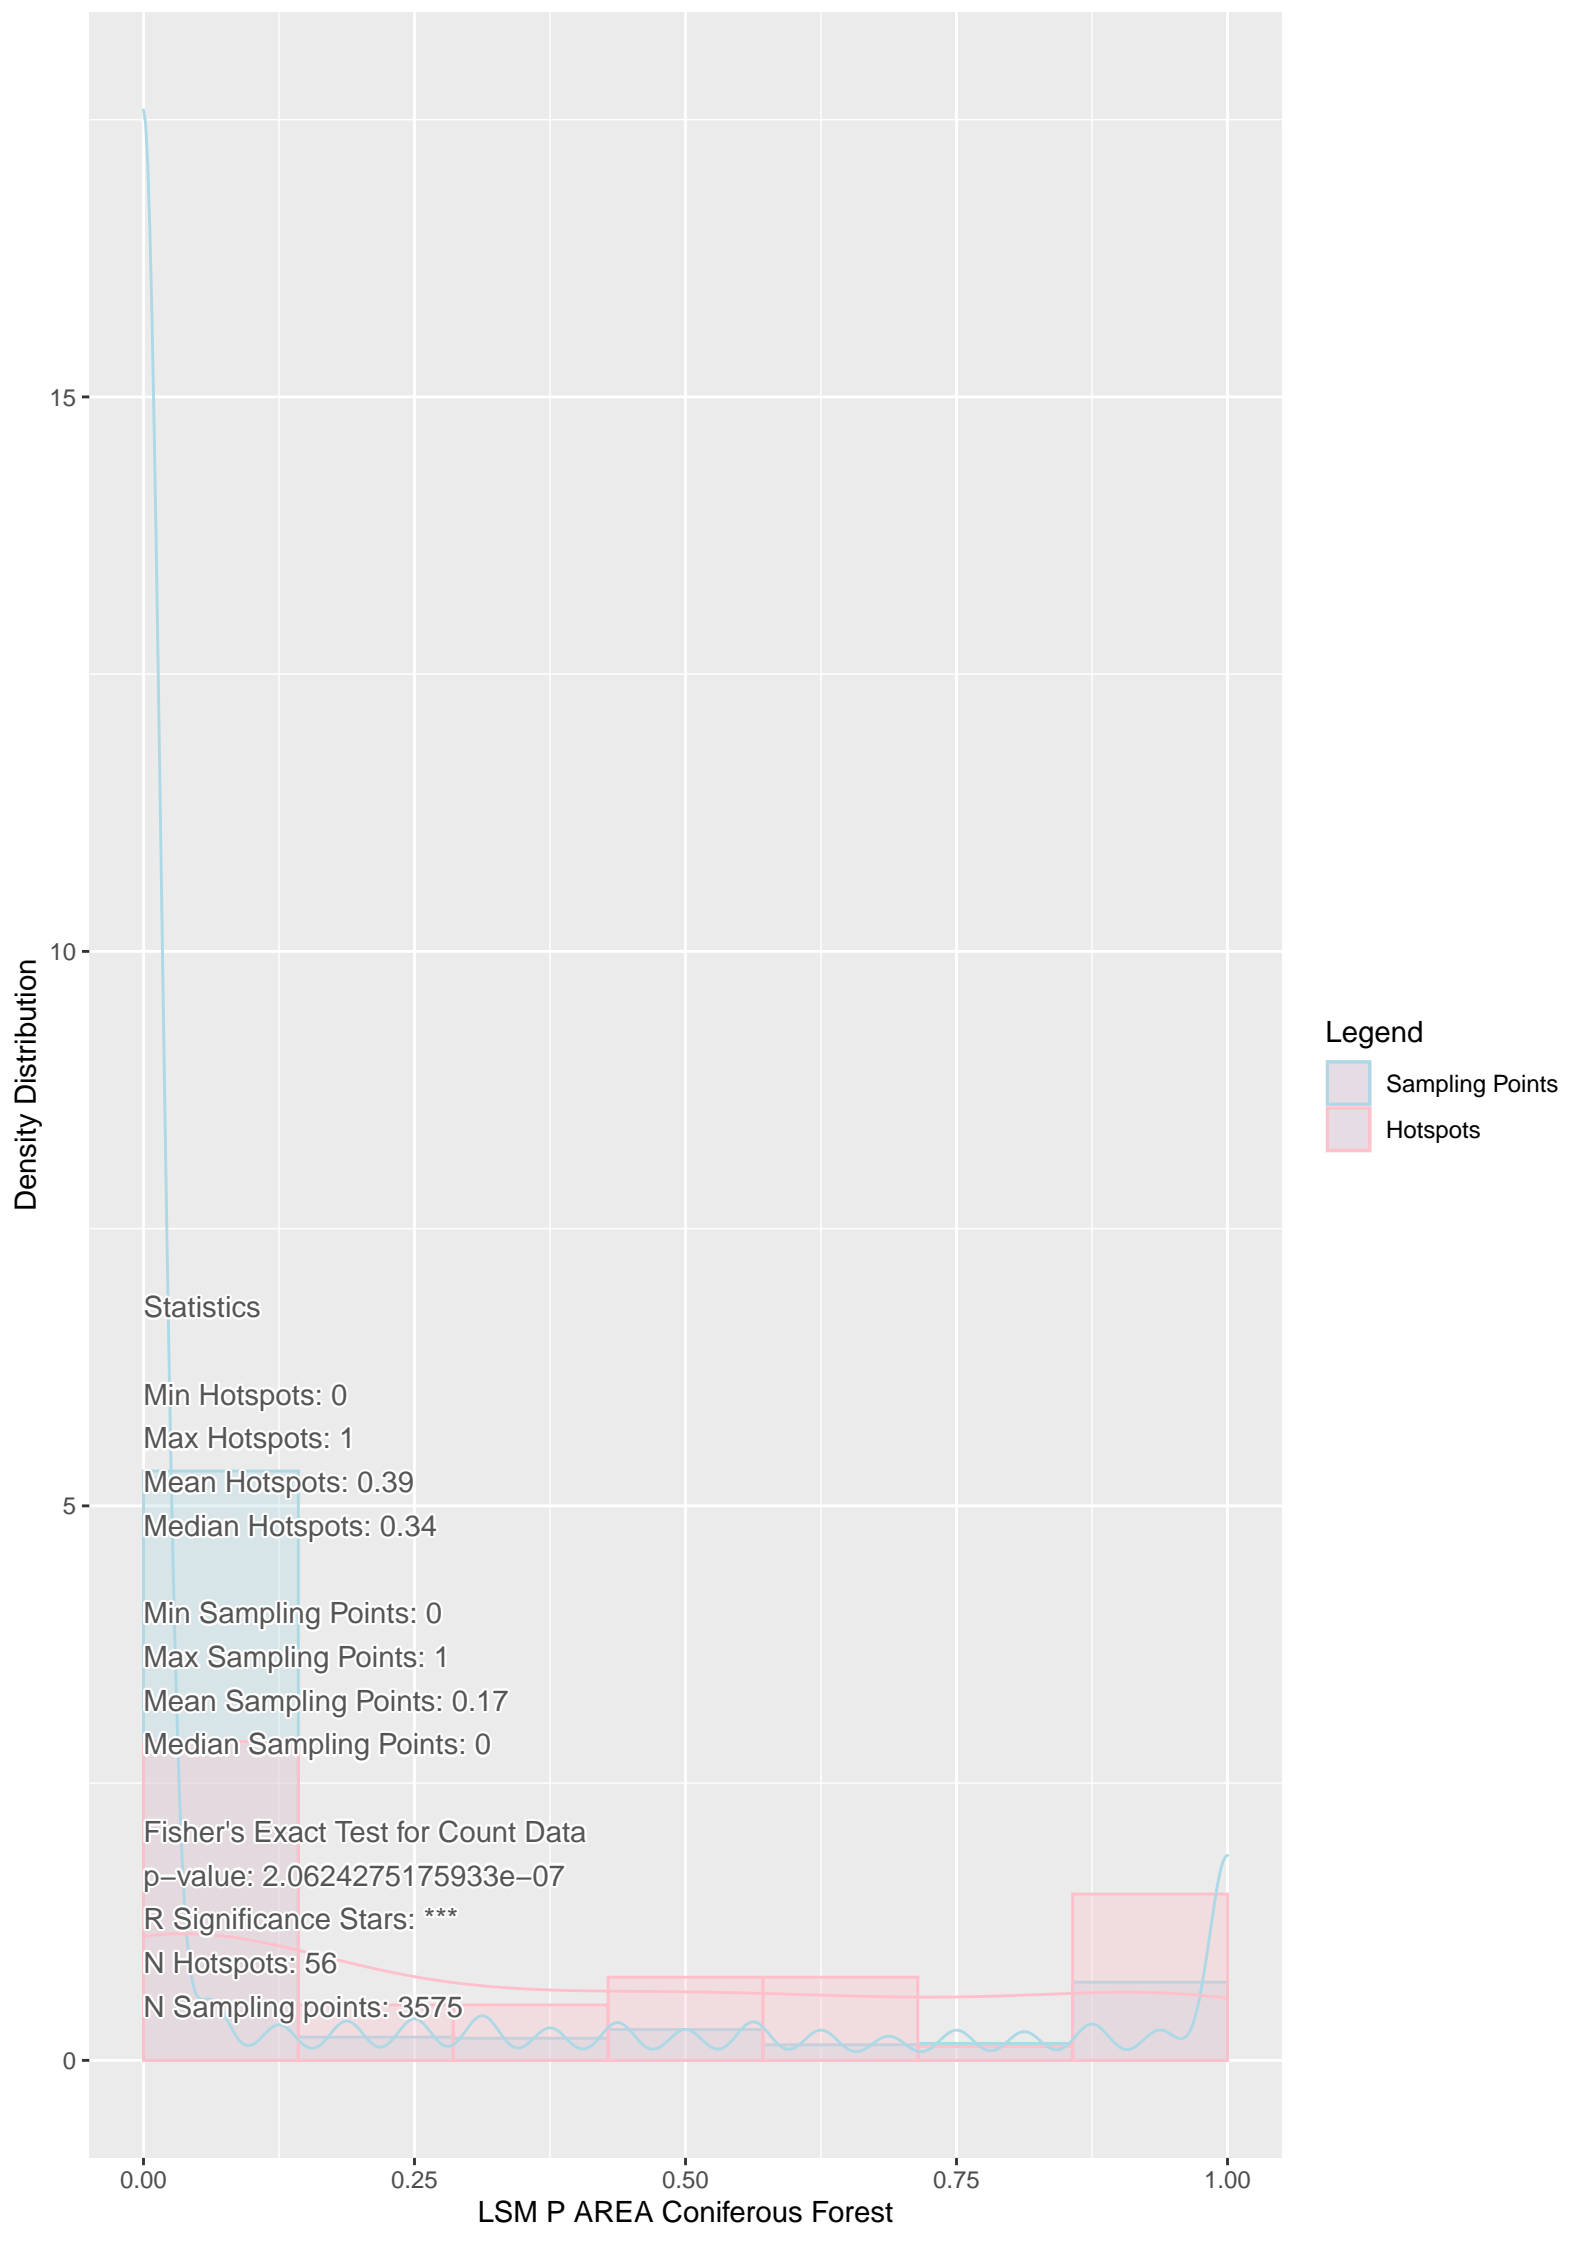

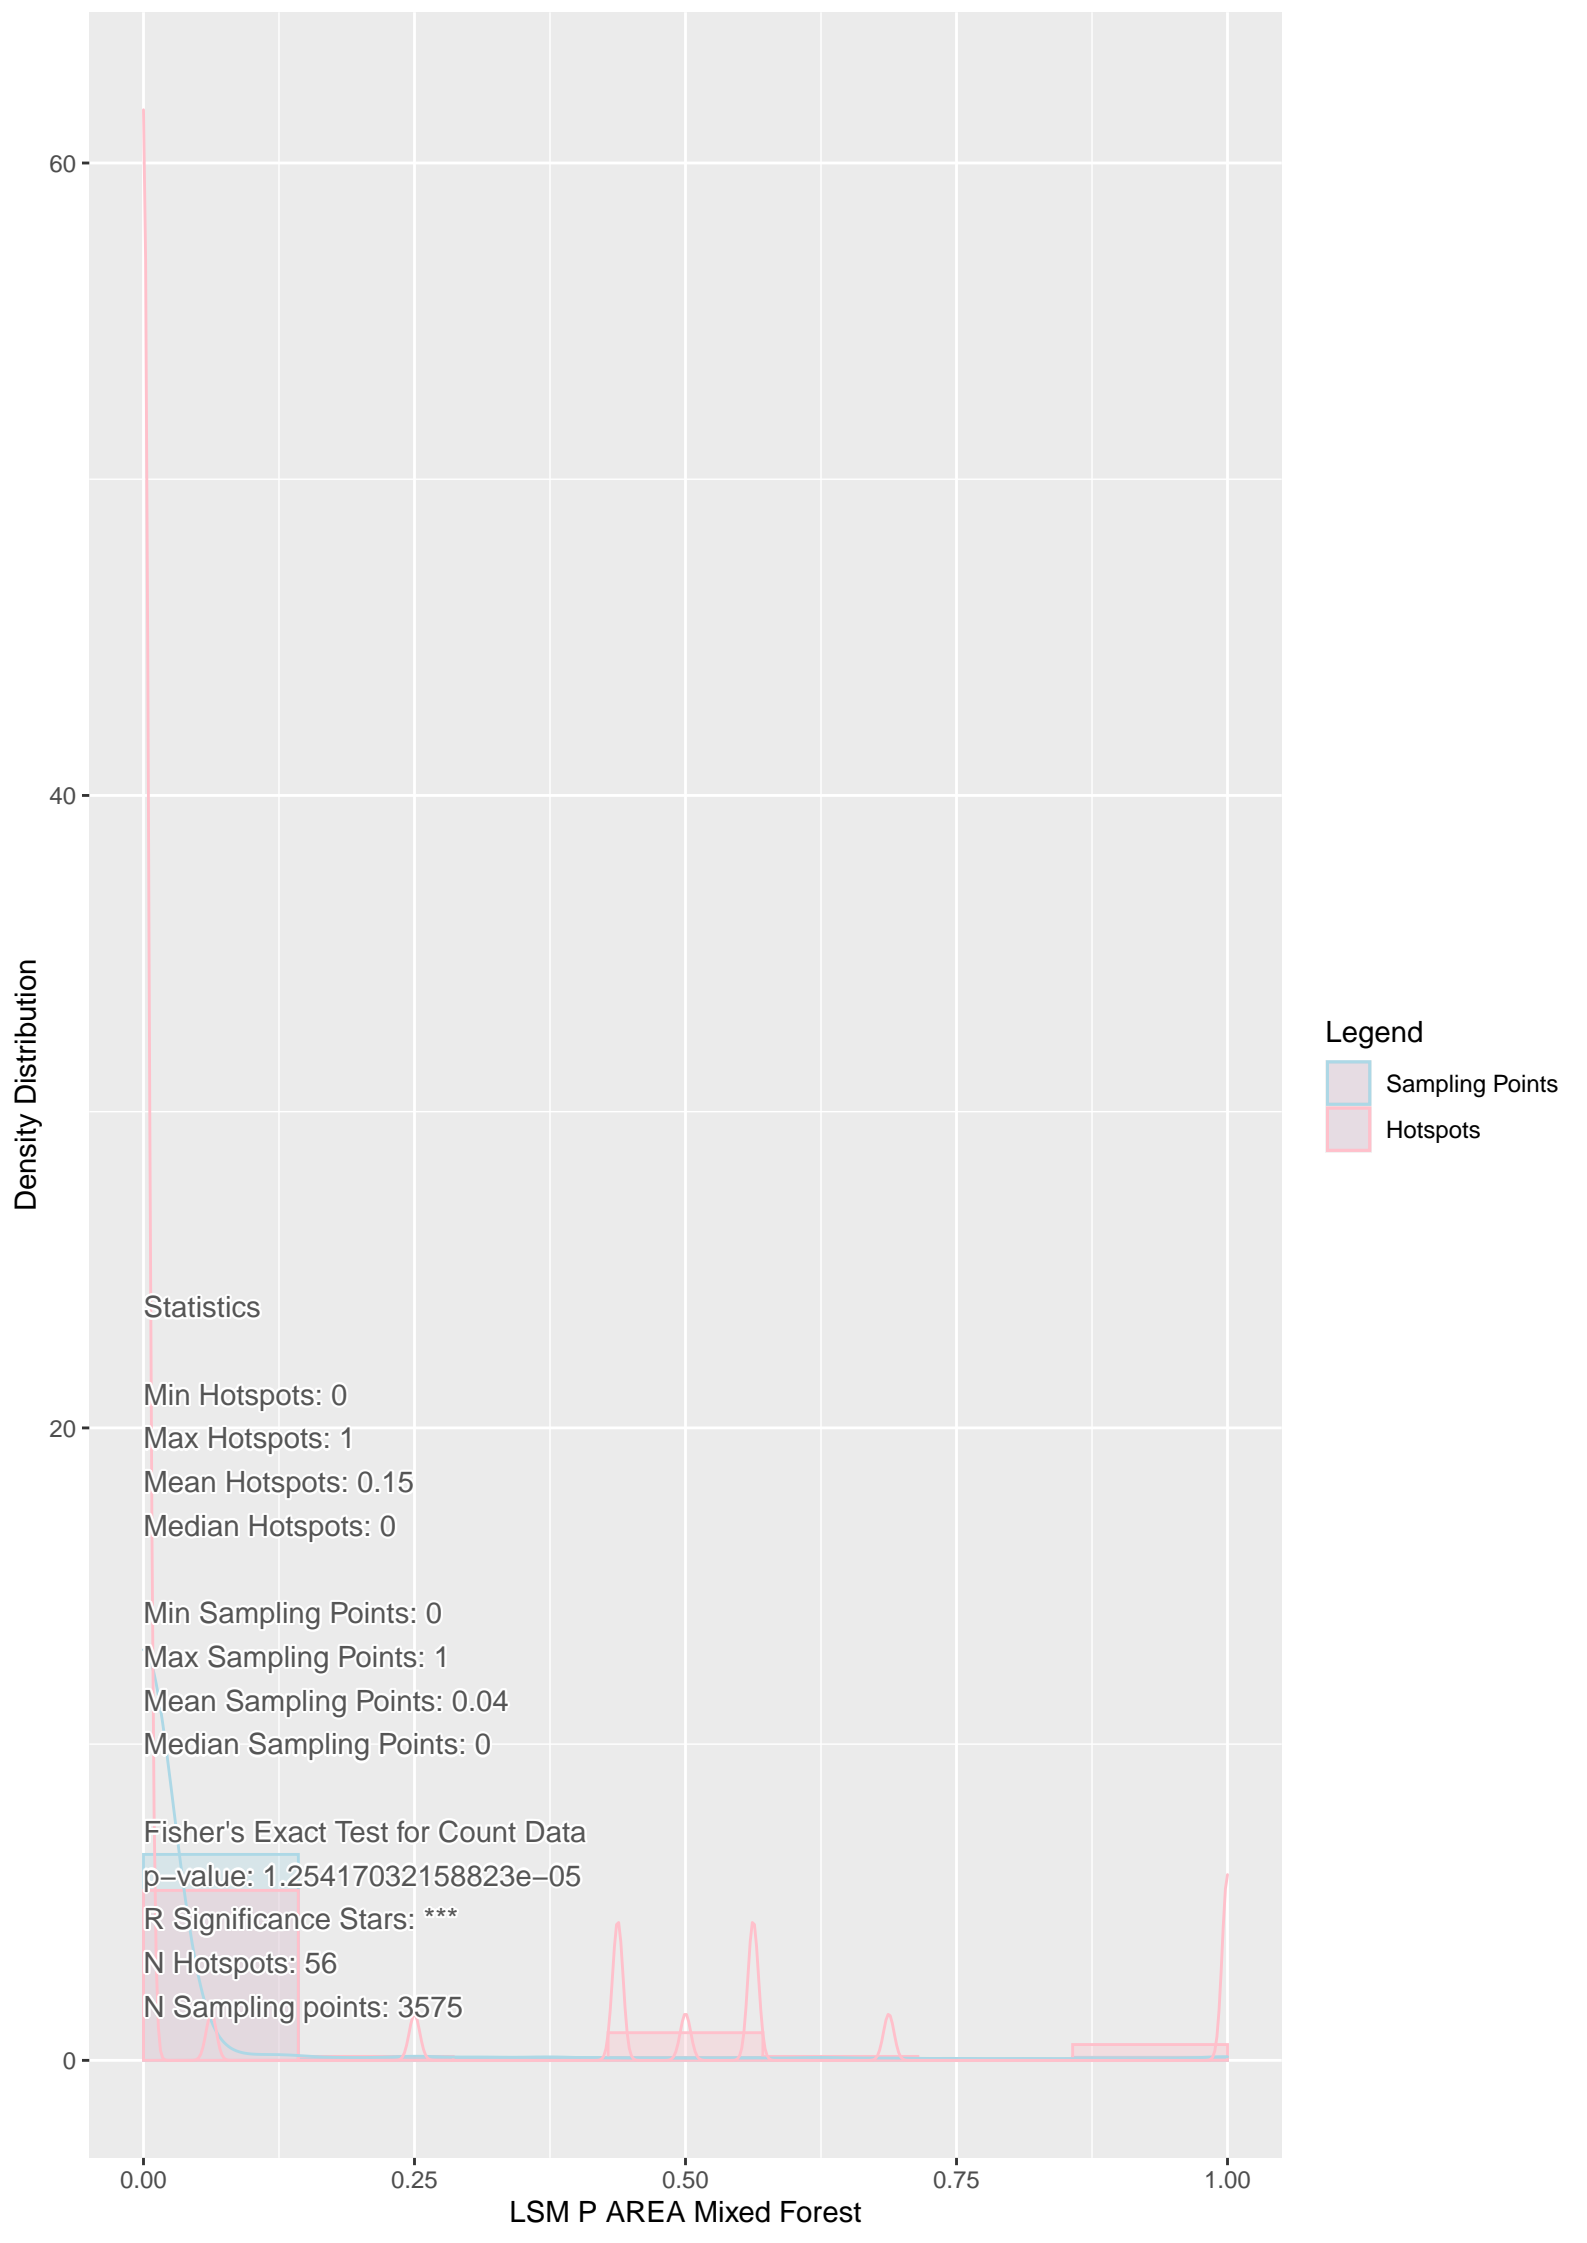

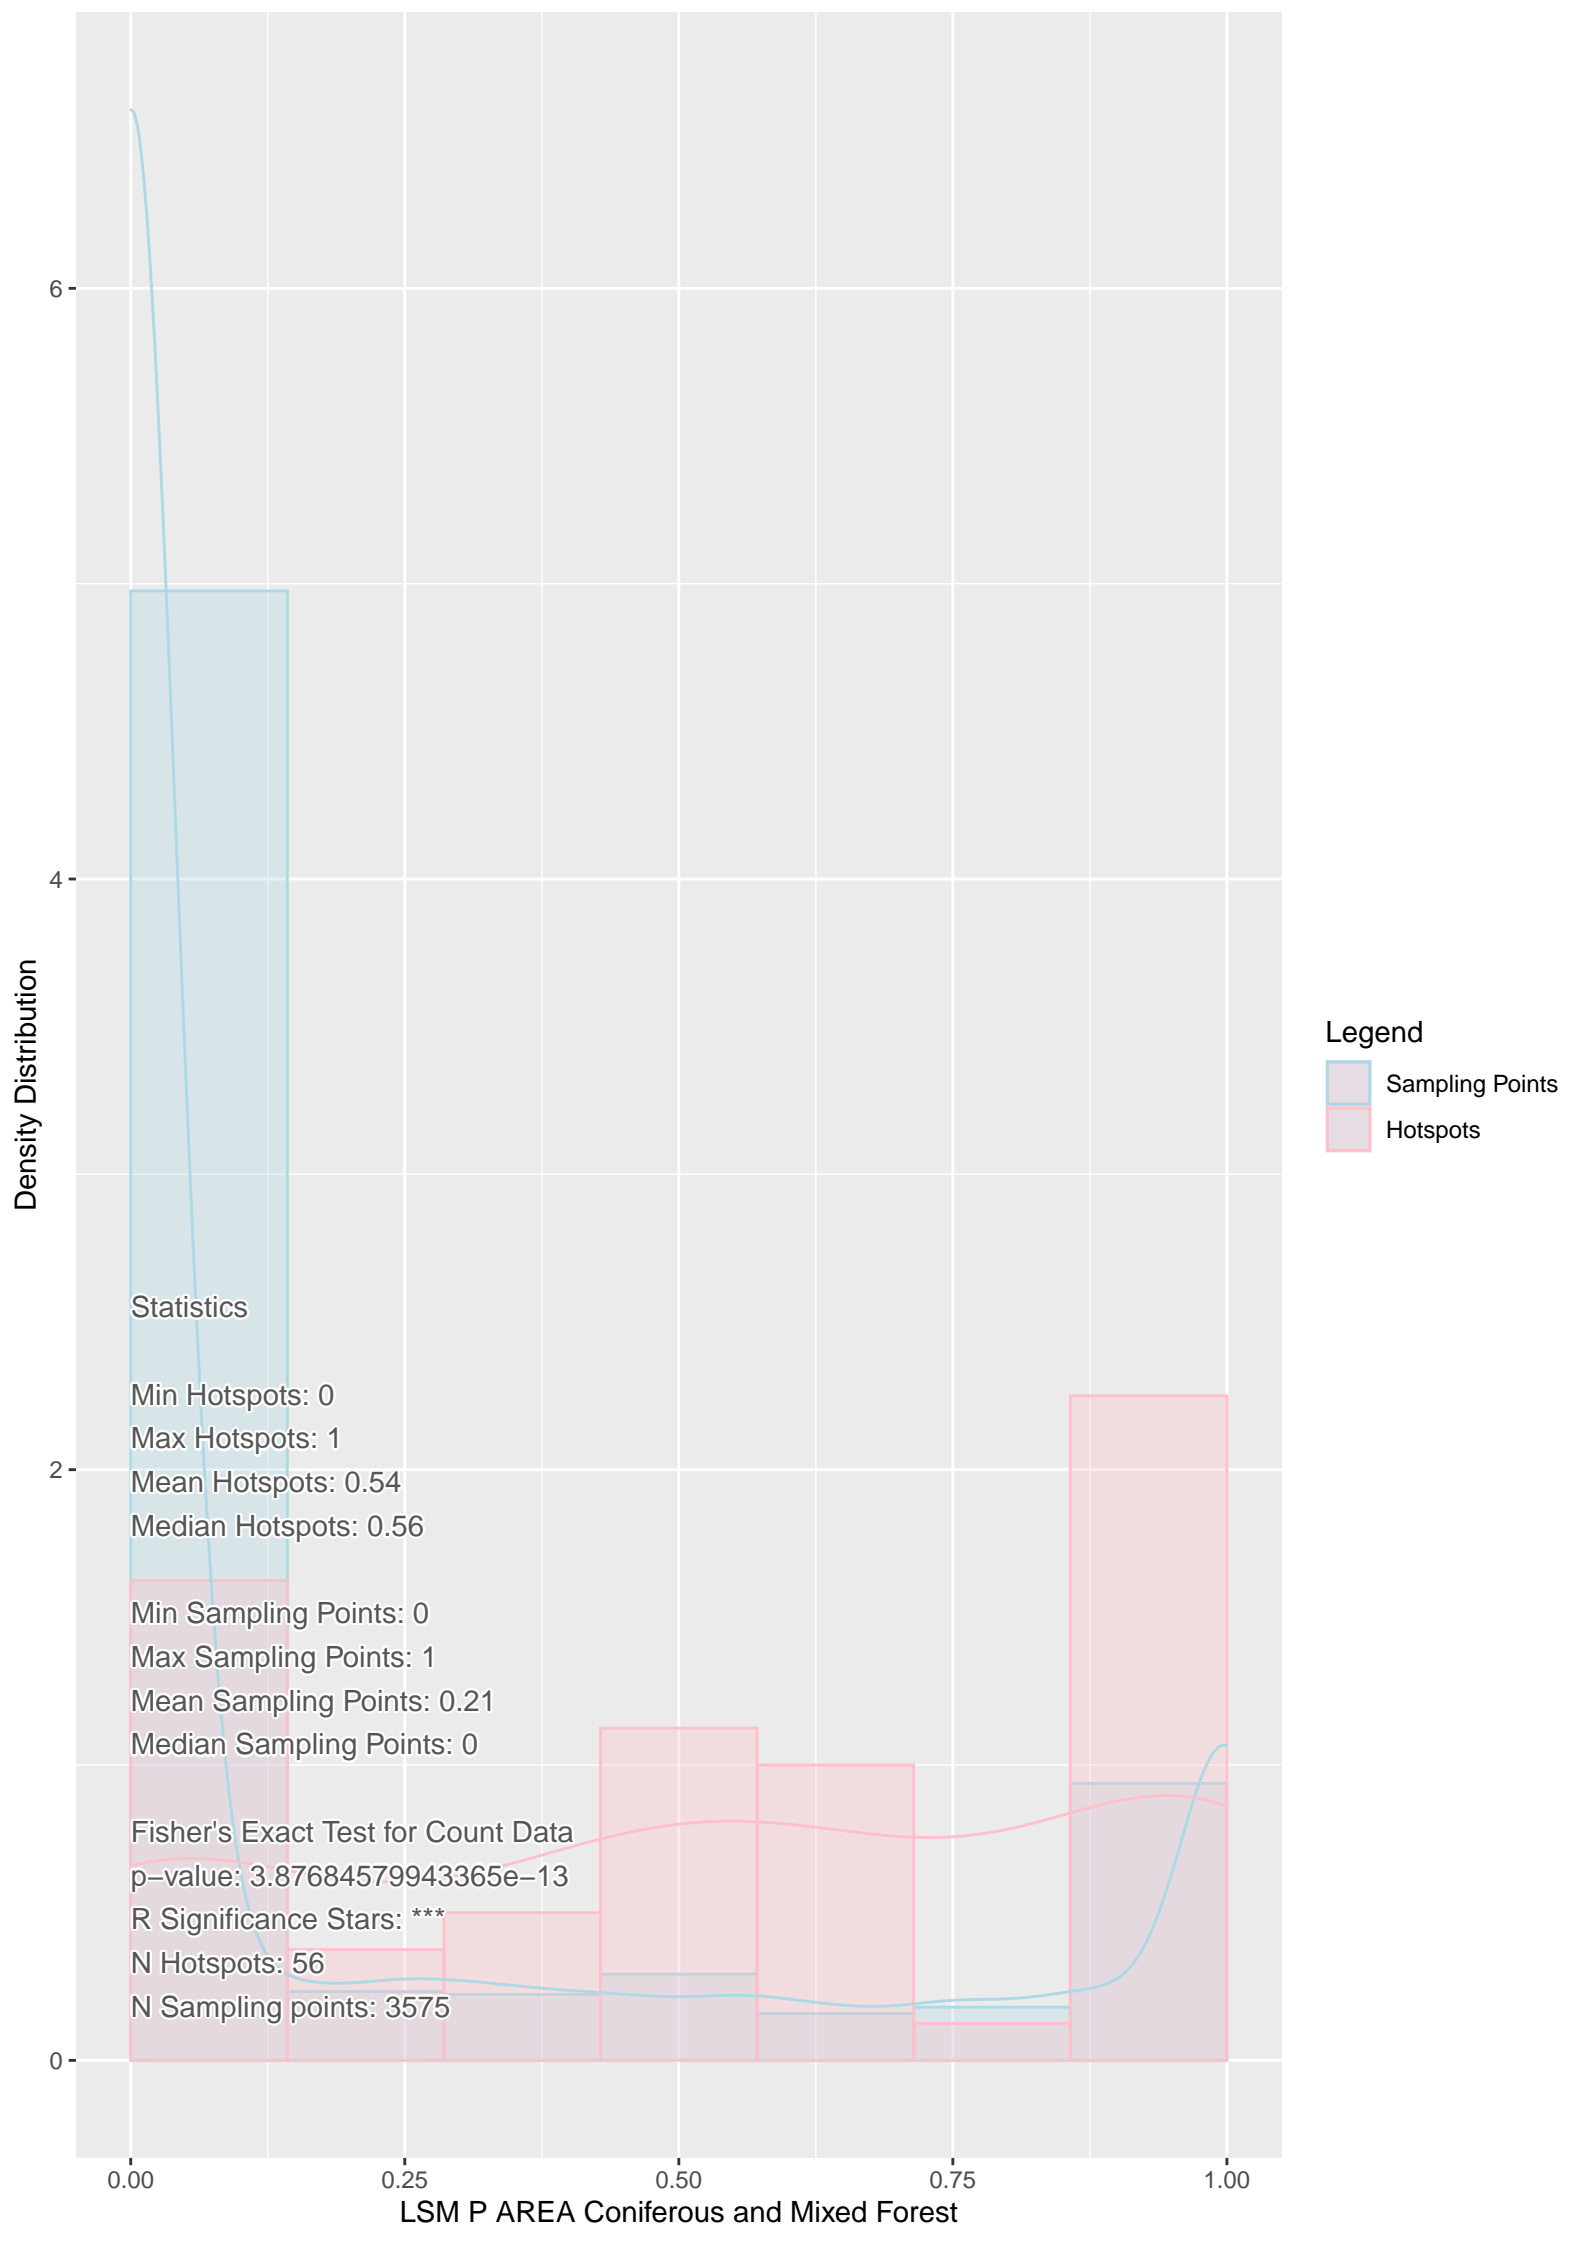

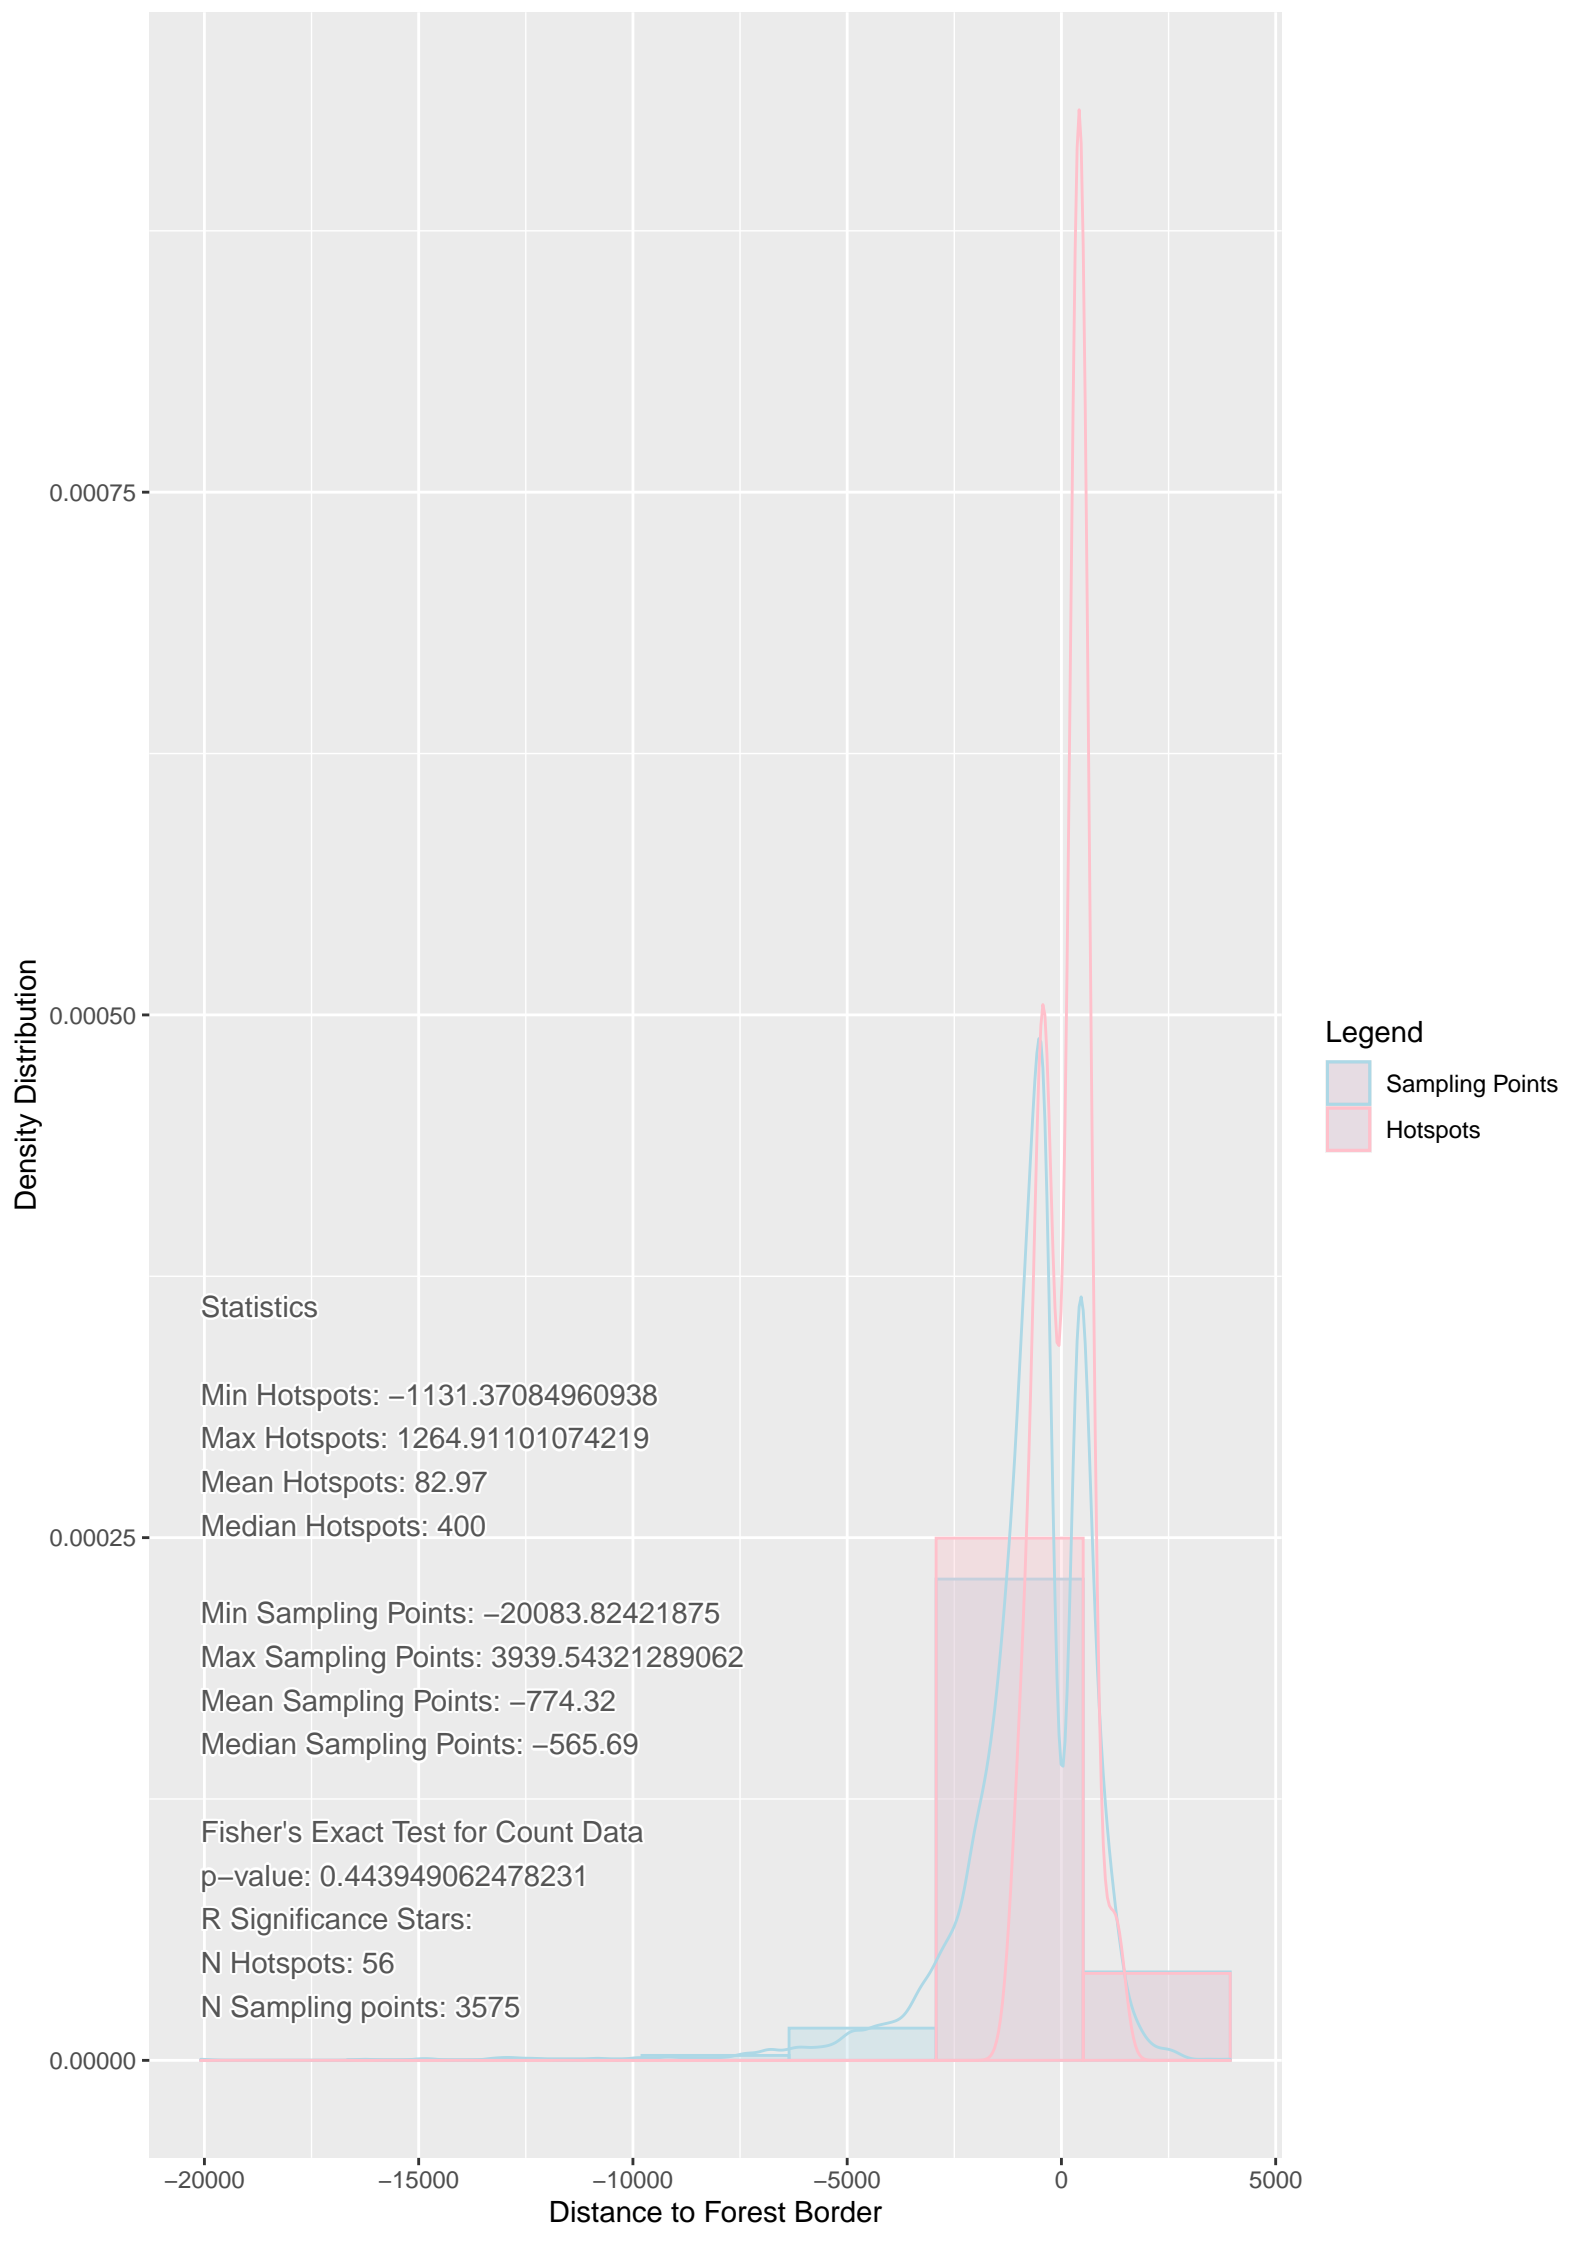

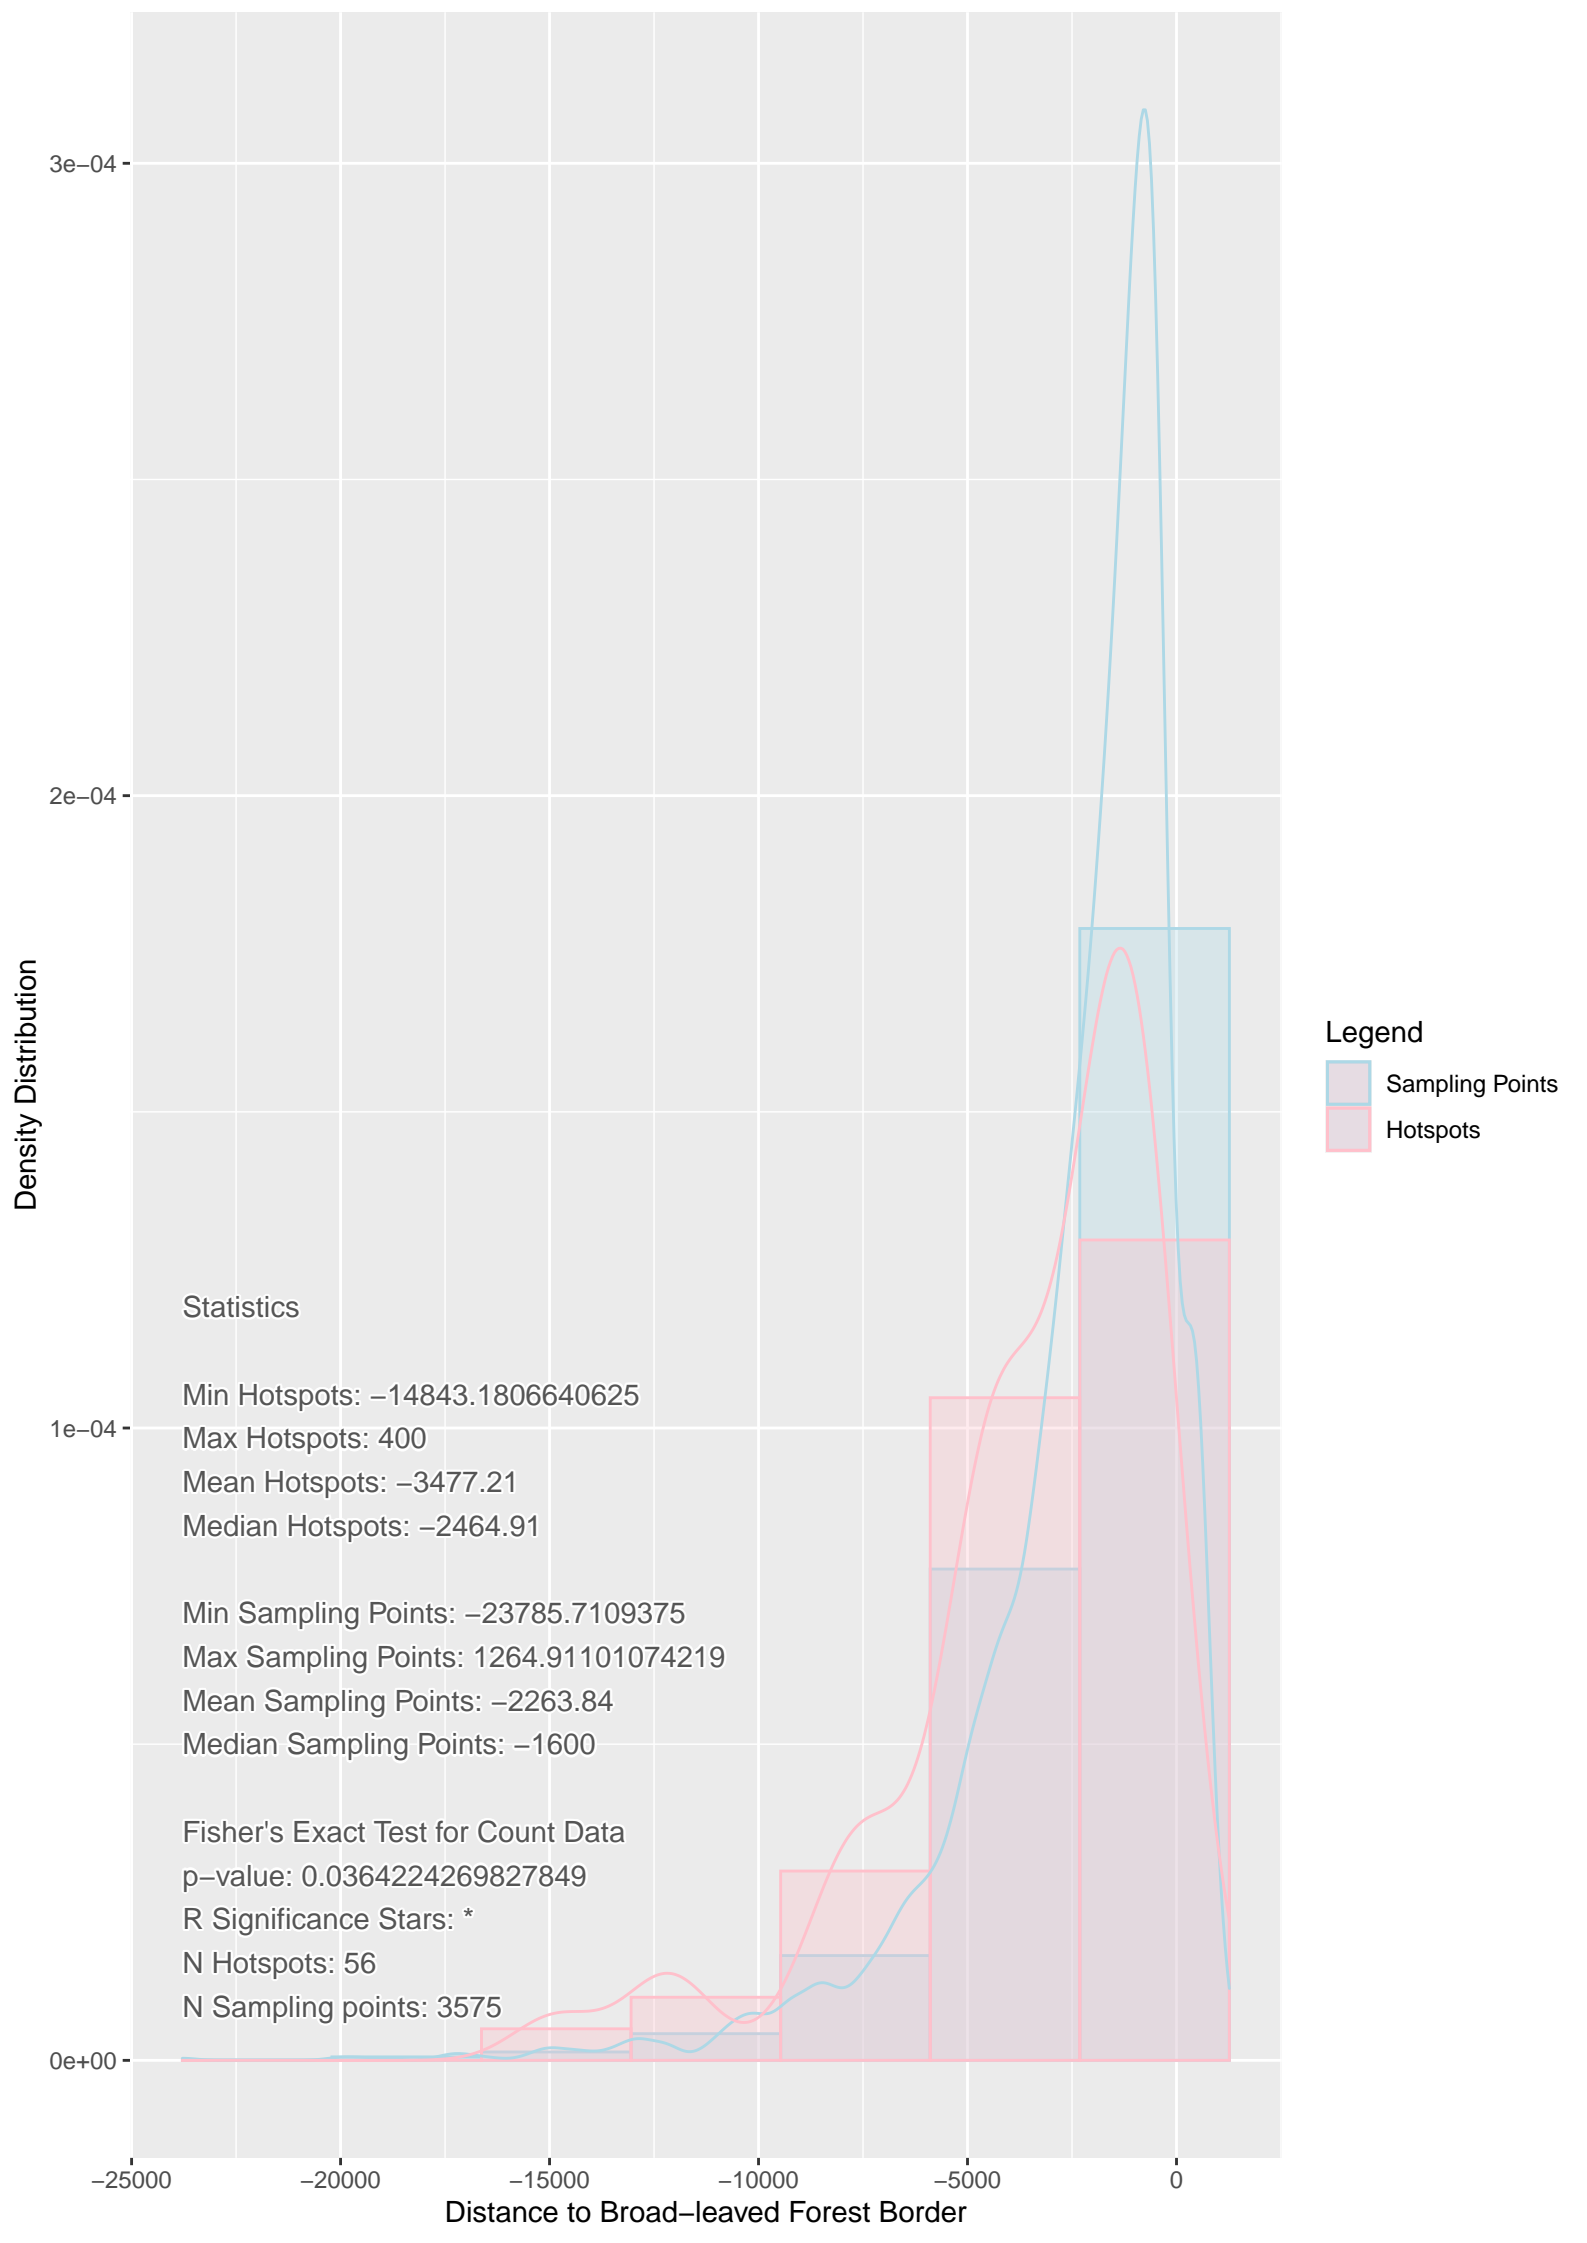

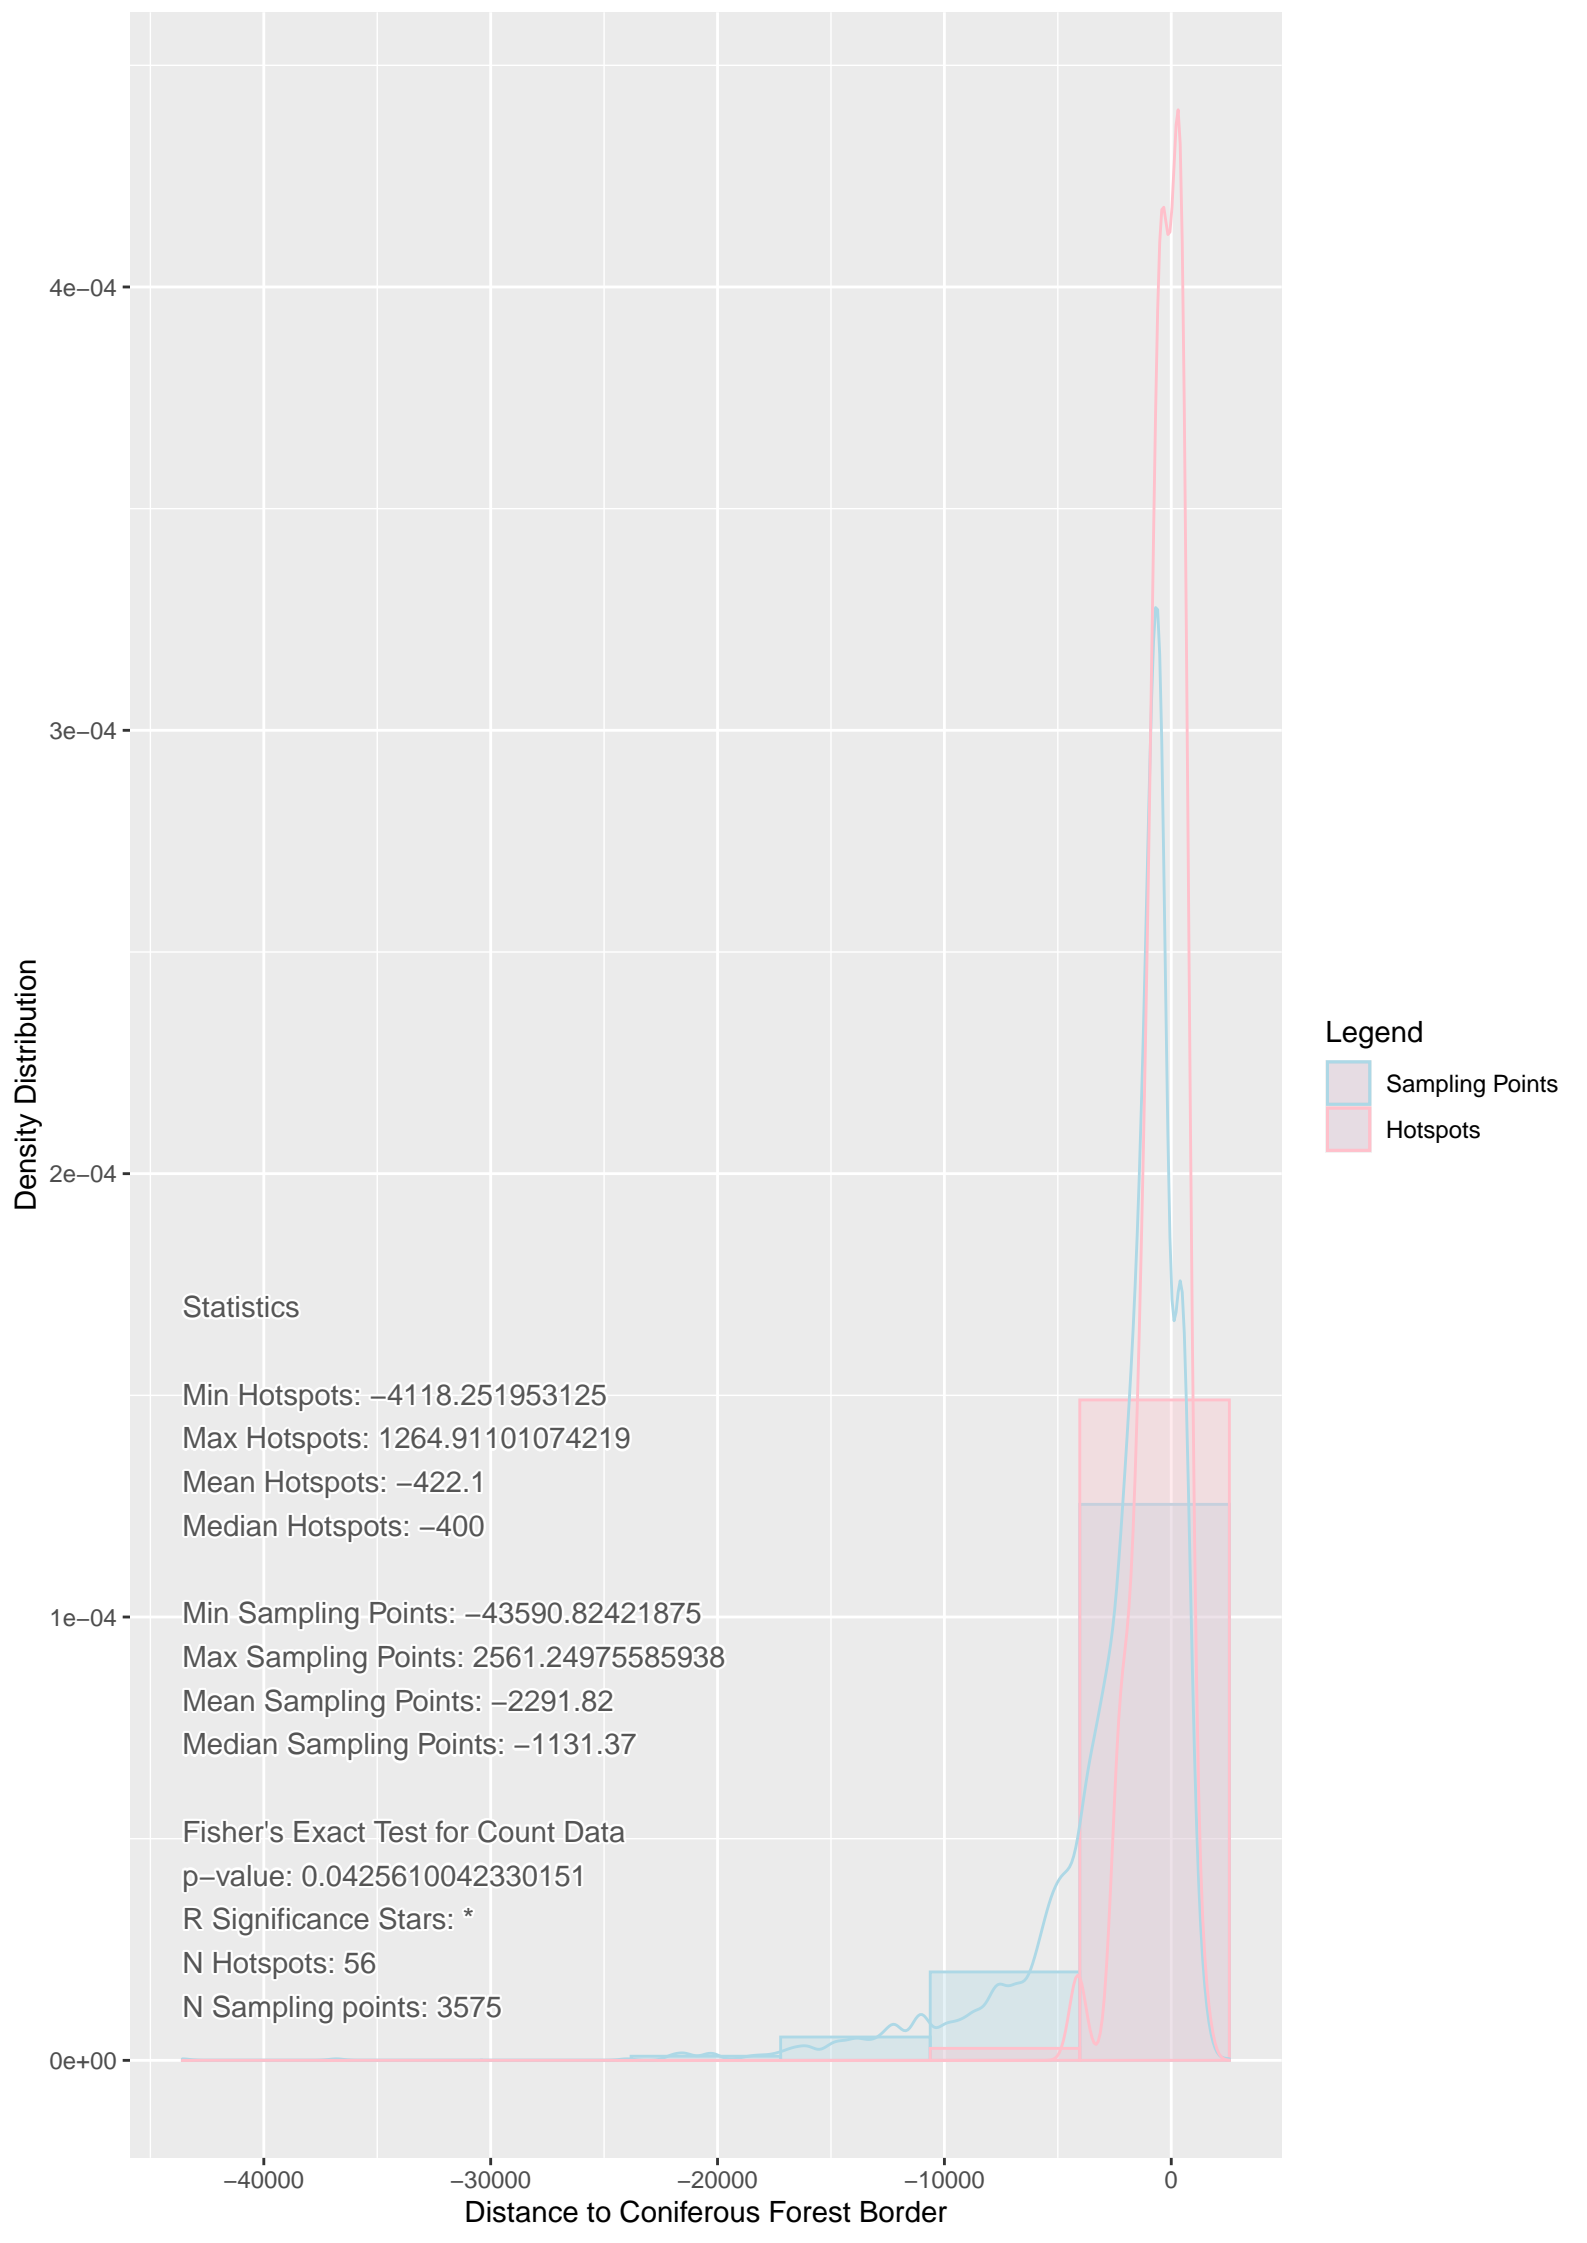

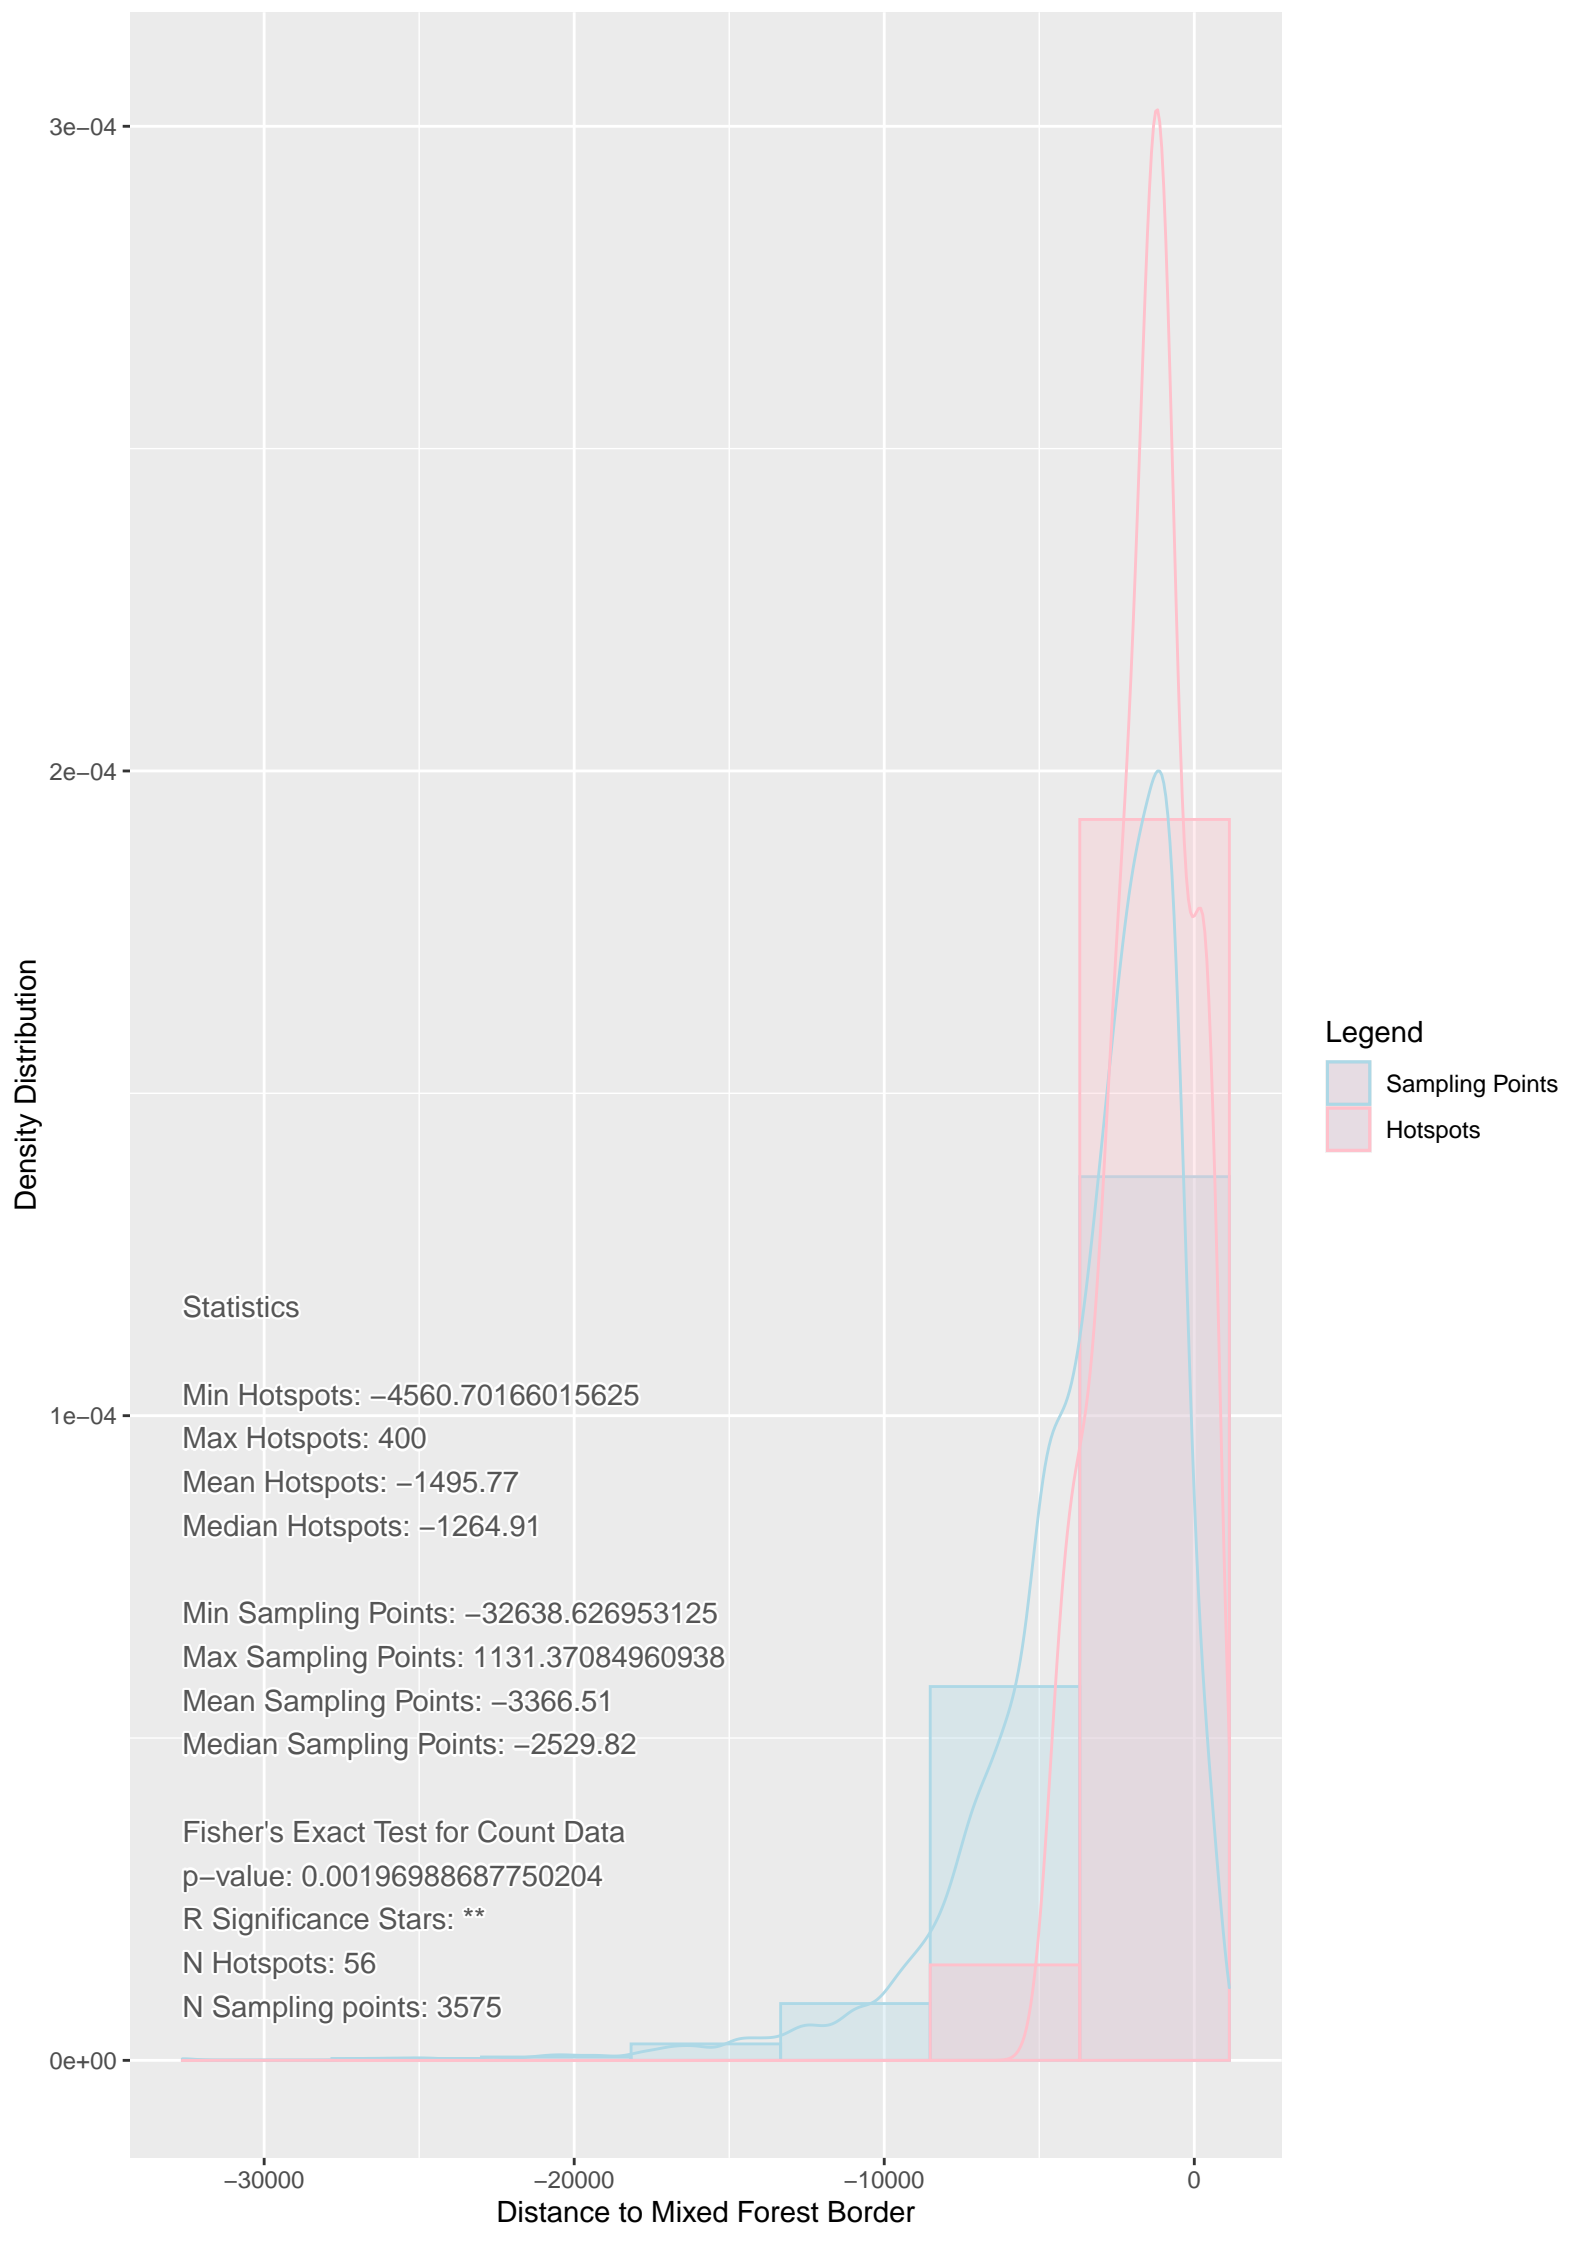

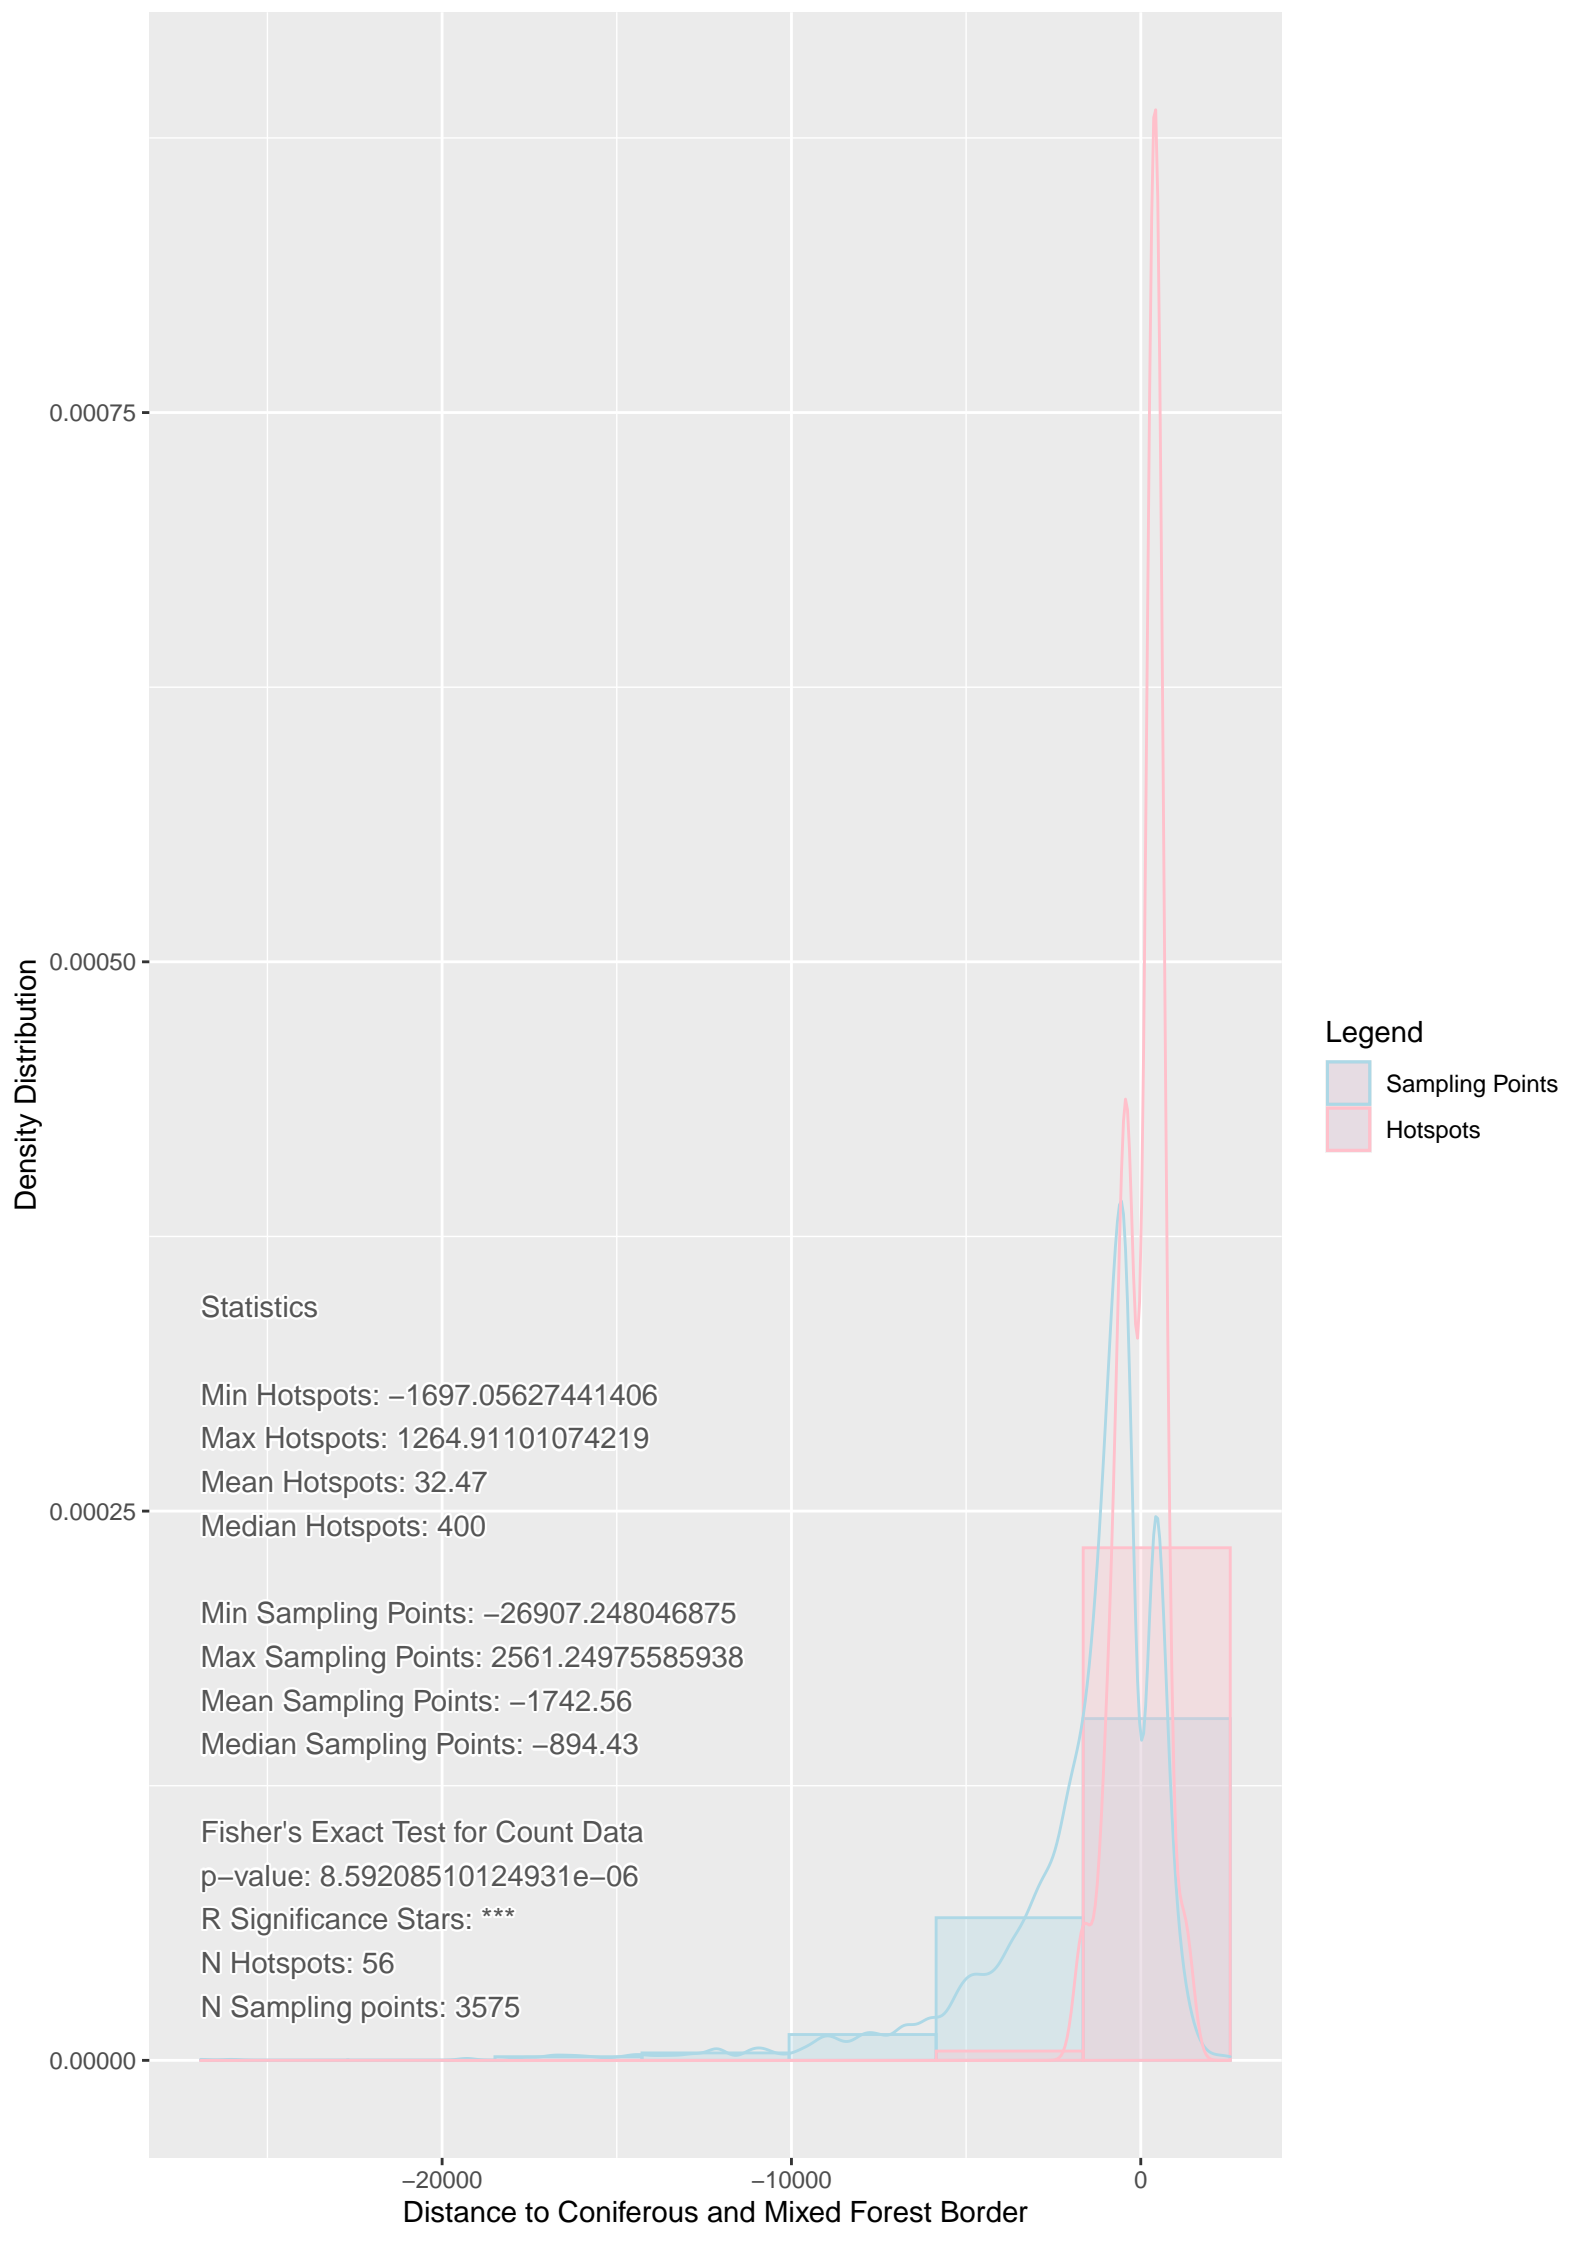



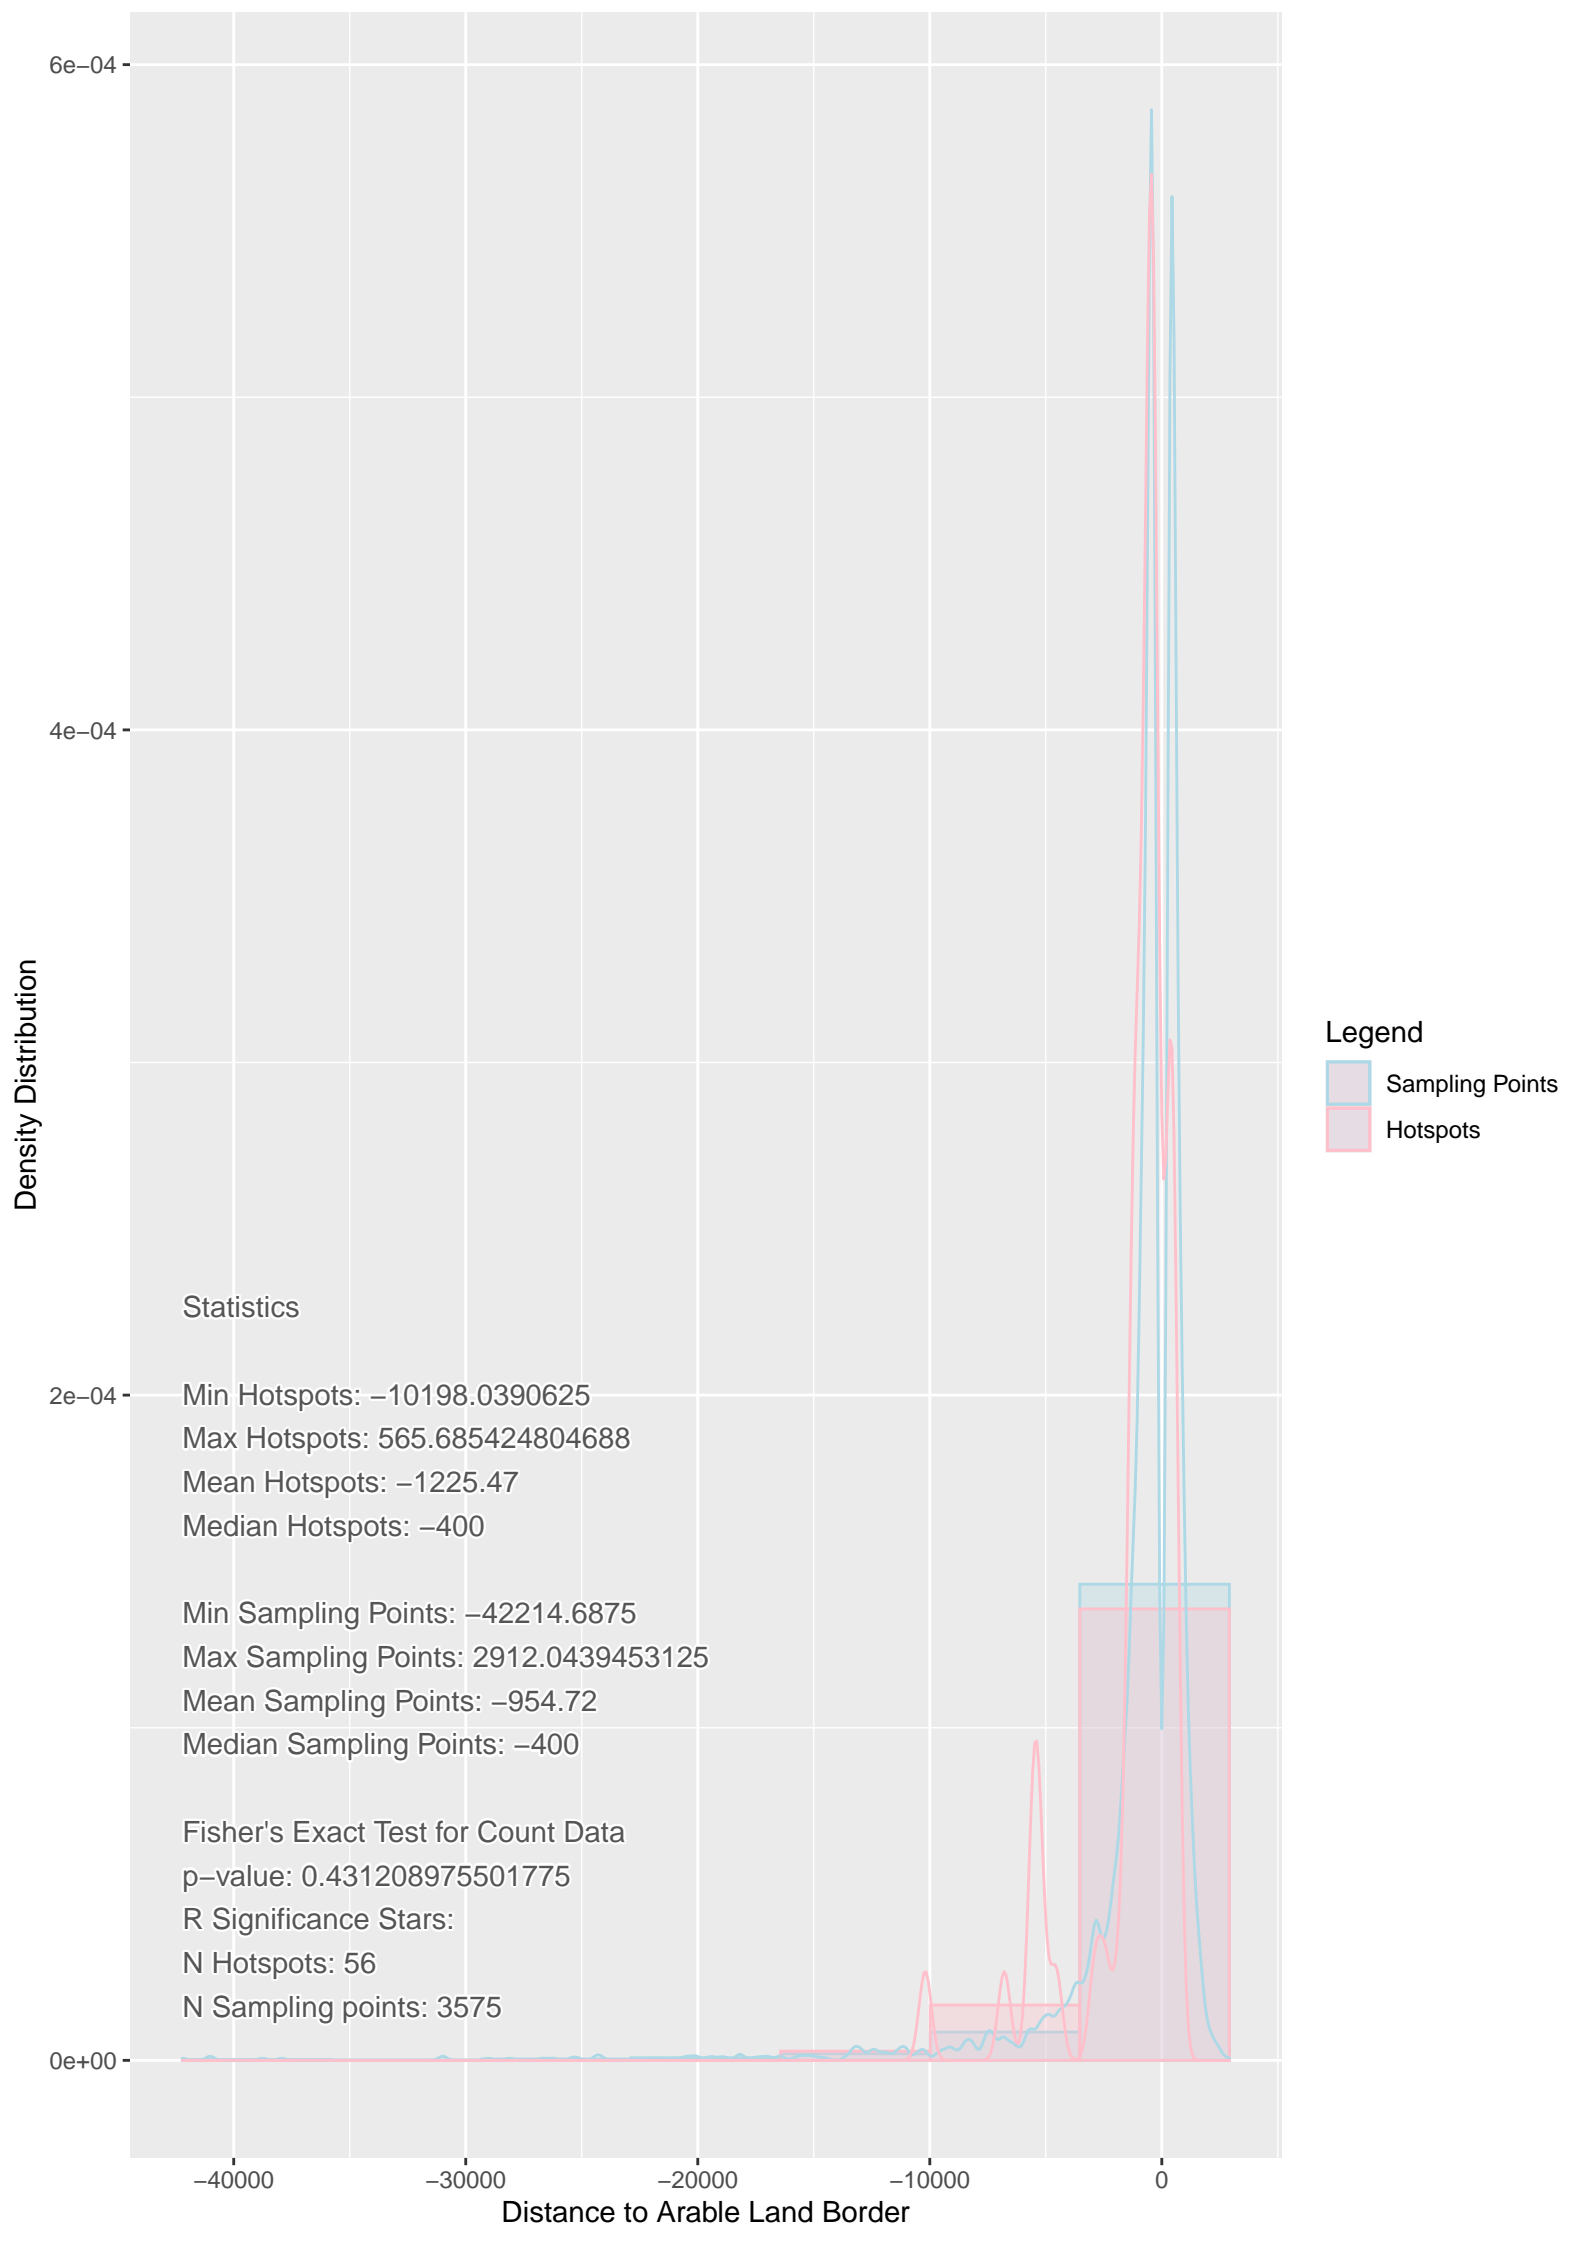

Supplement: s1 [file s1]

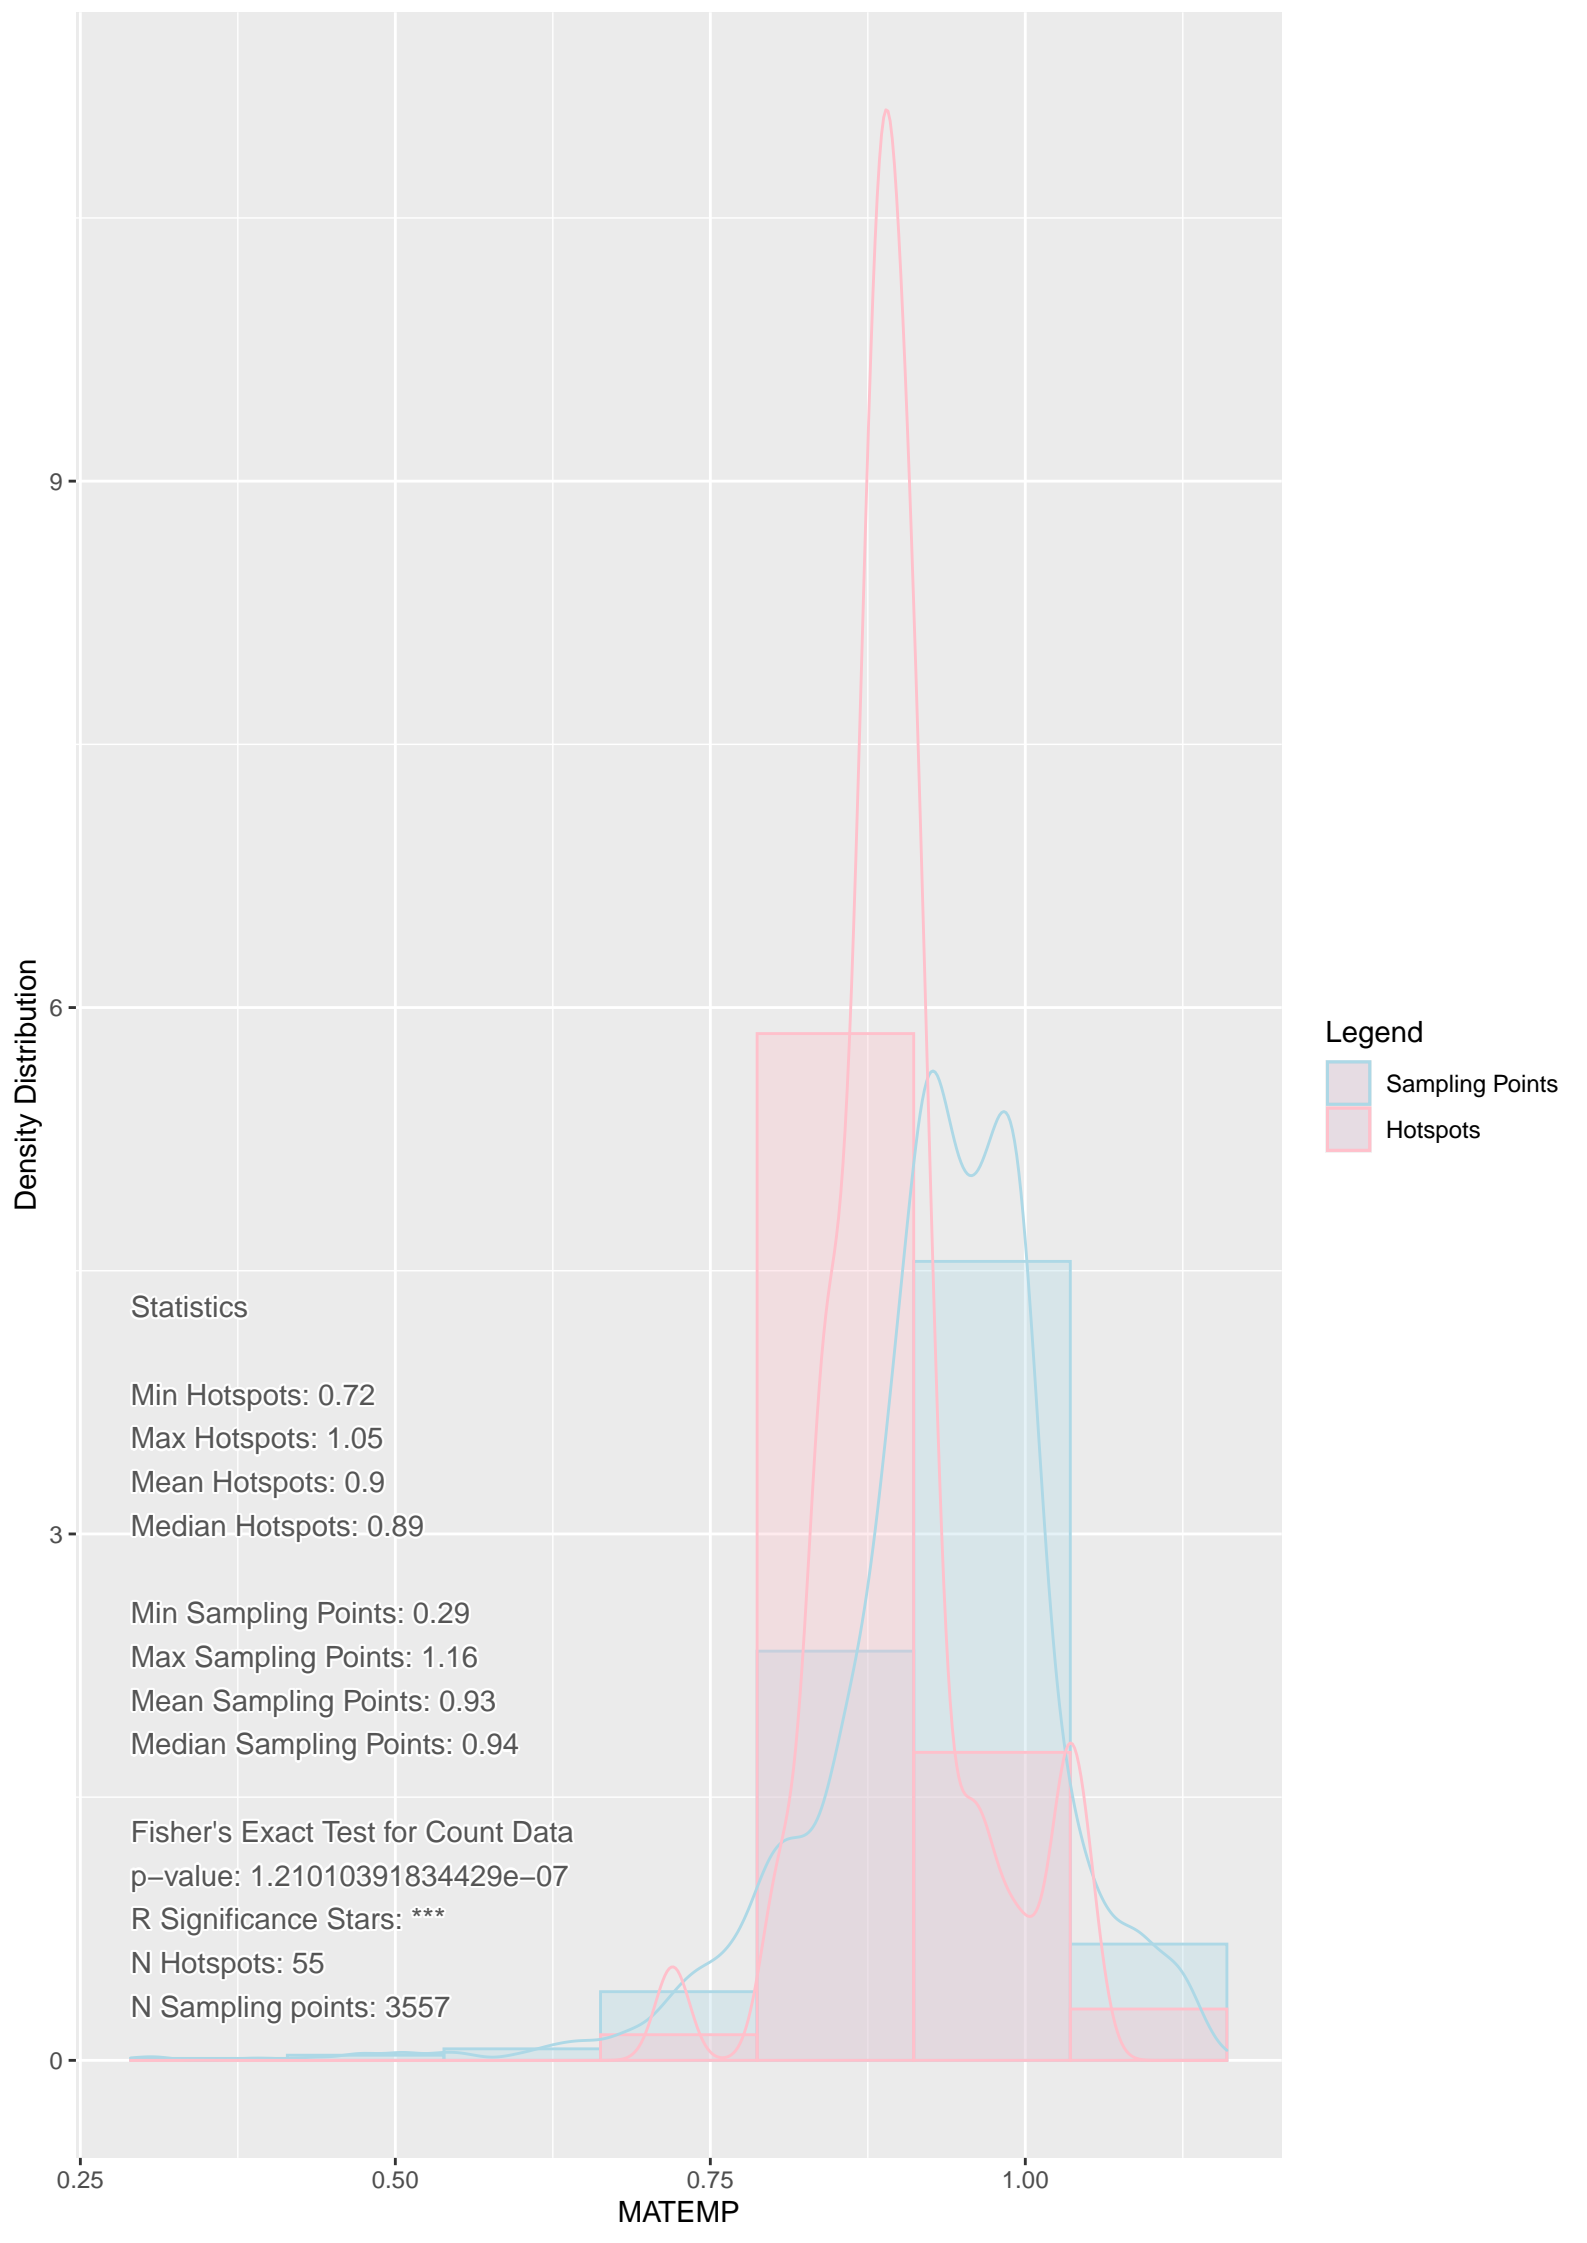

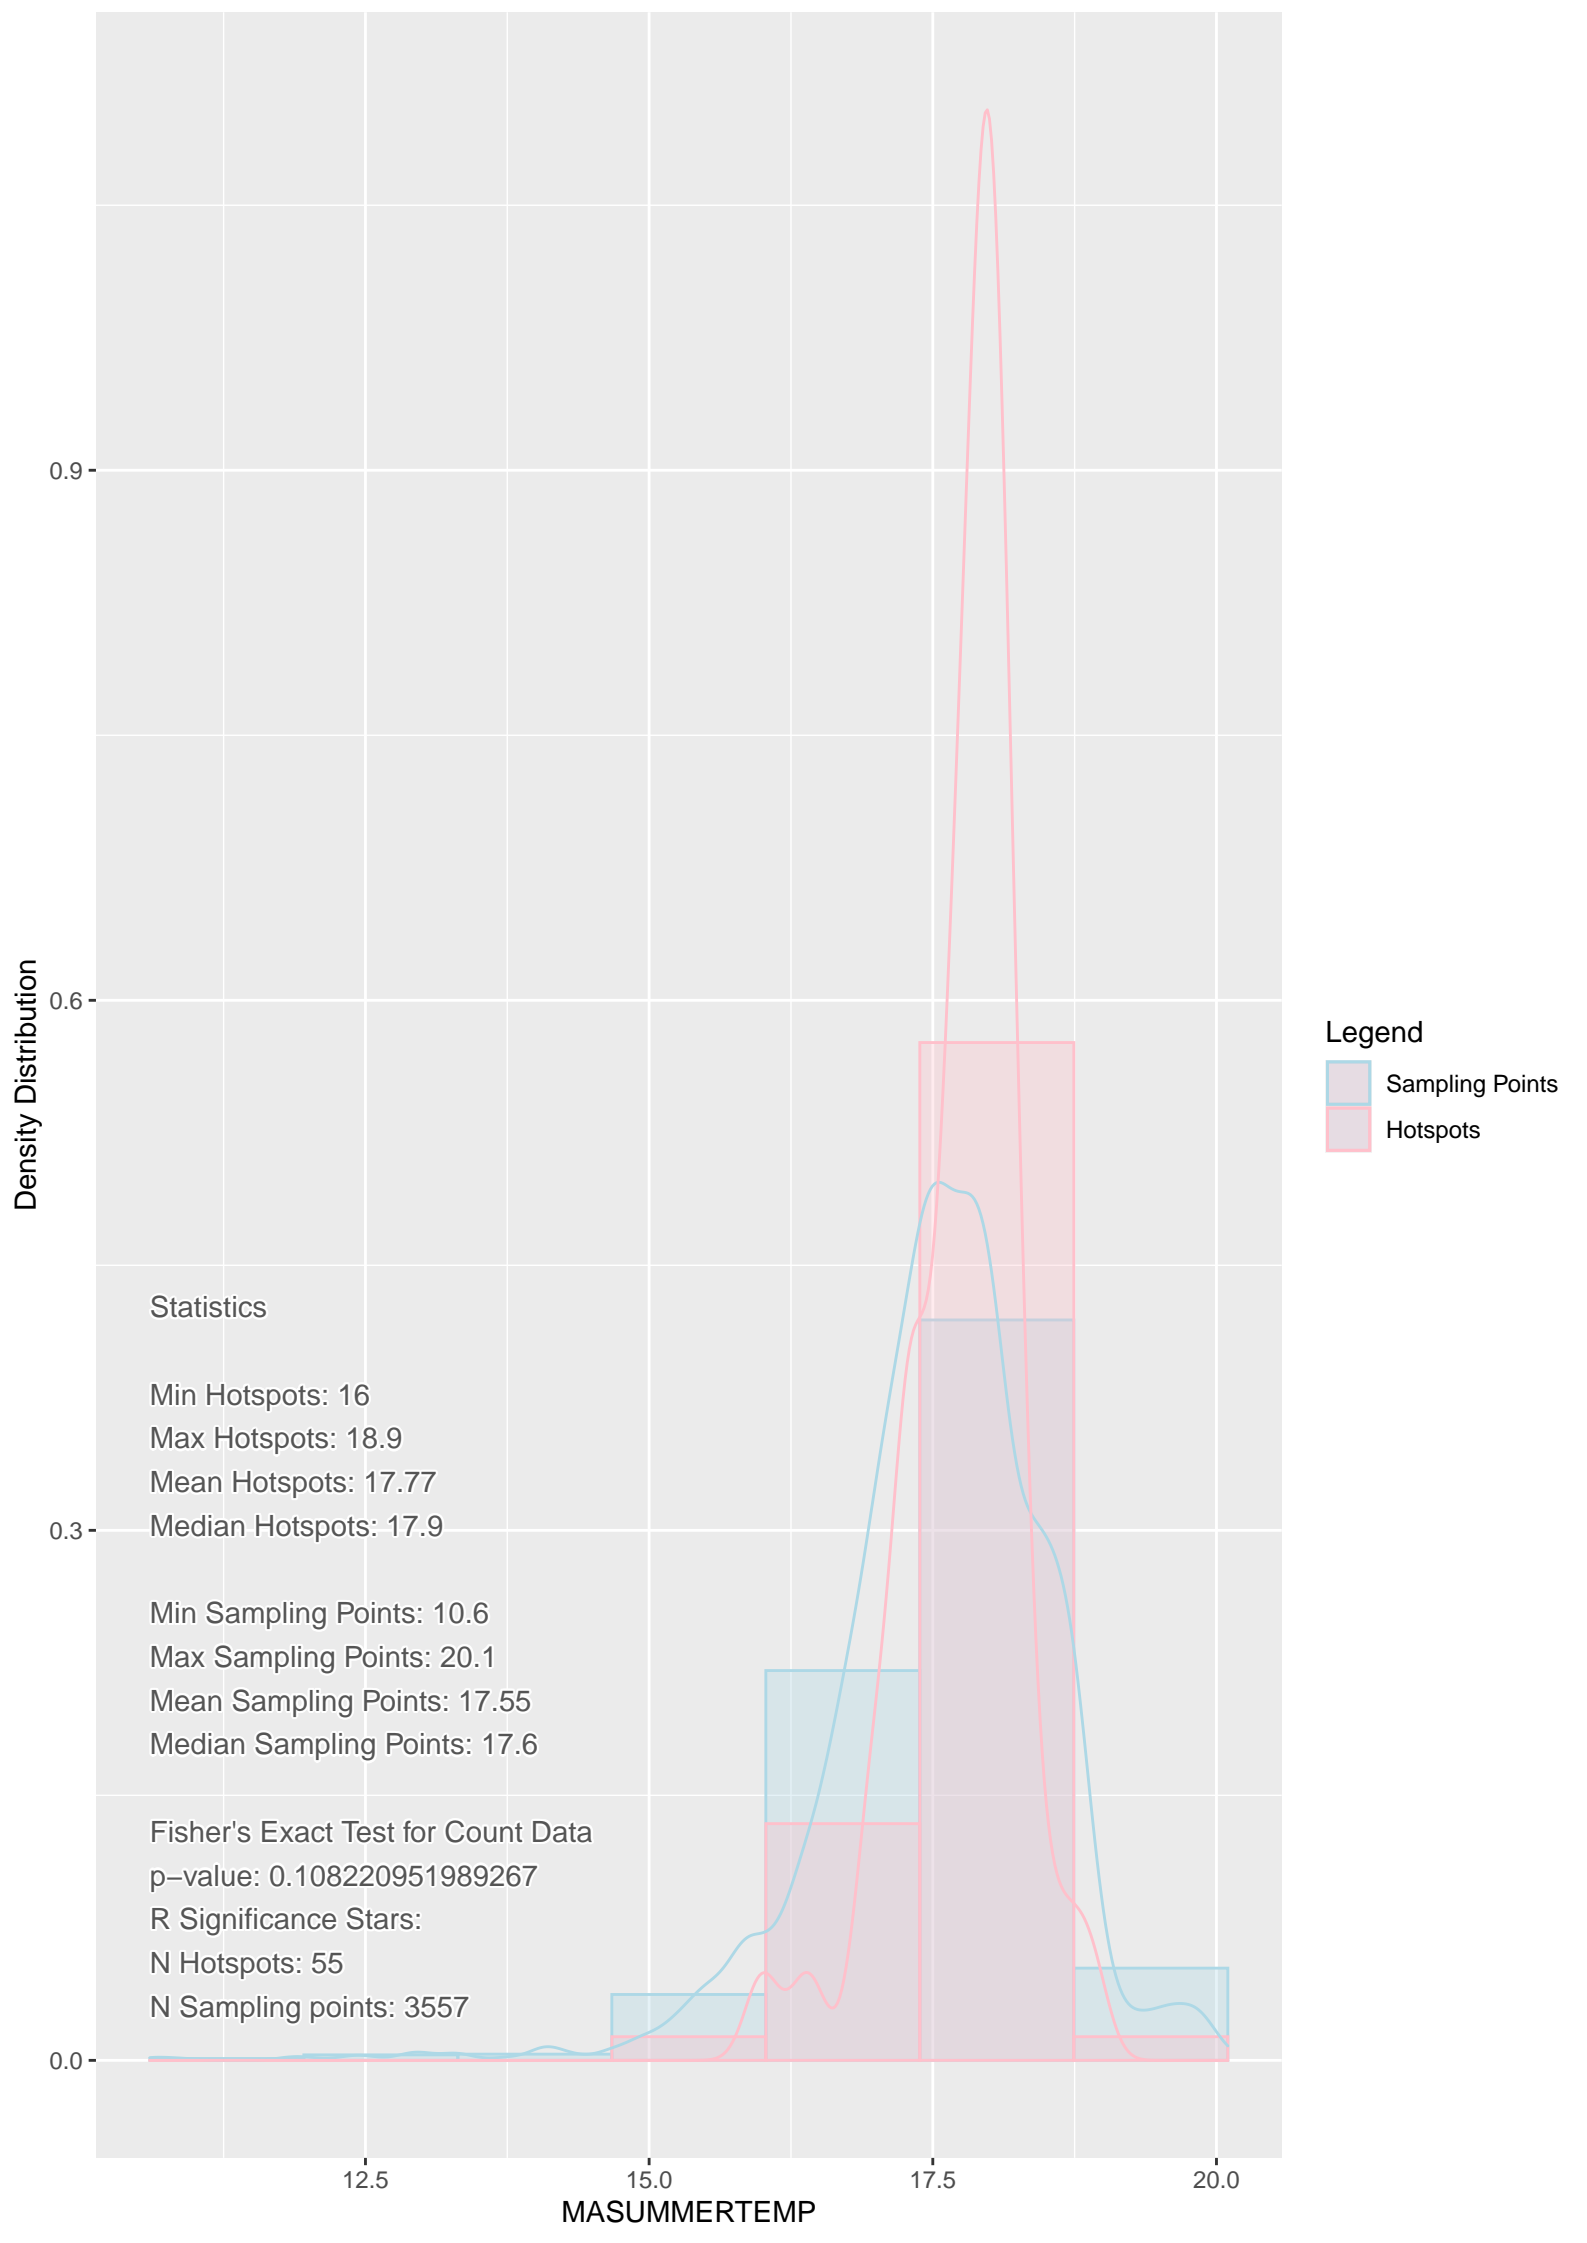

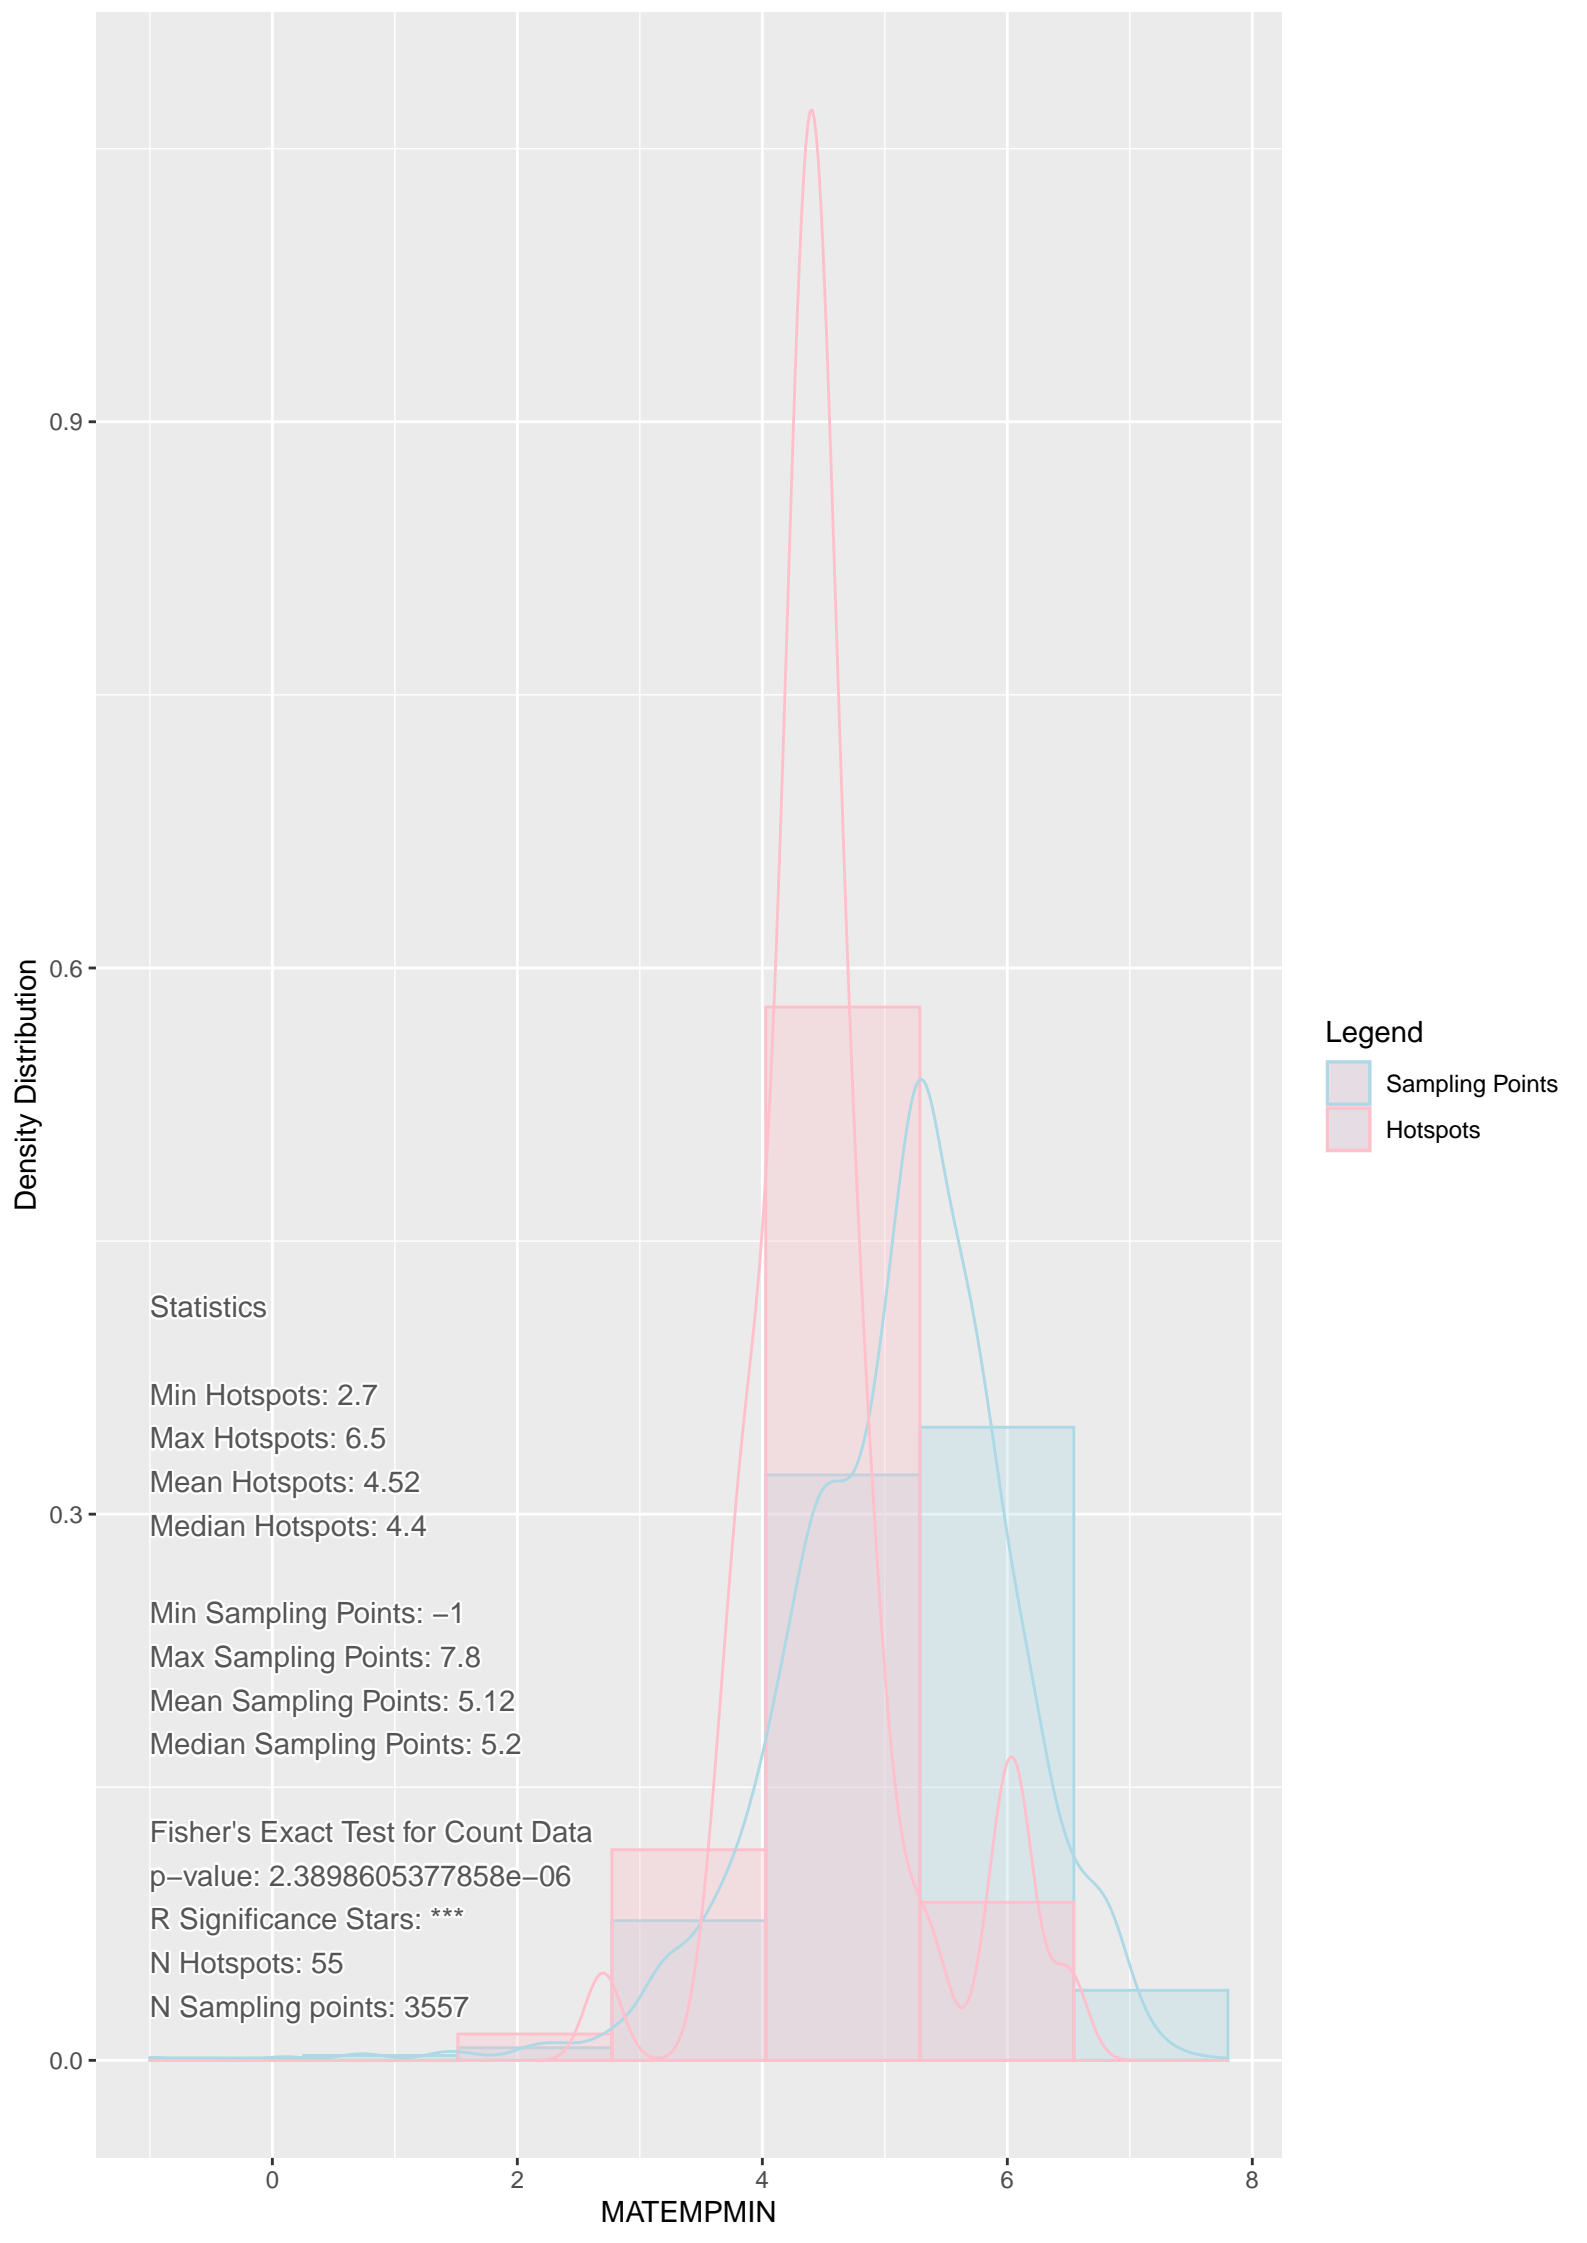

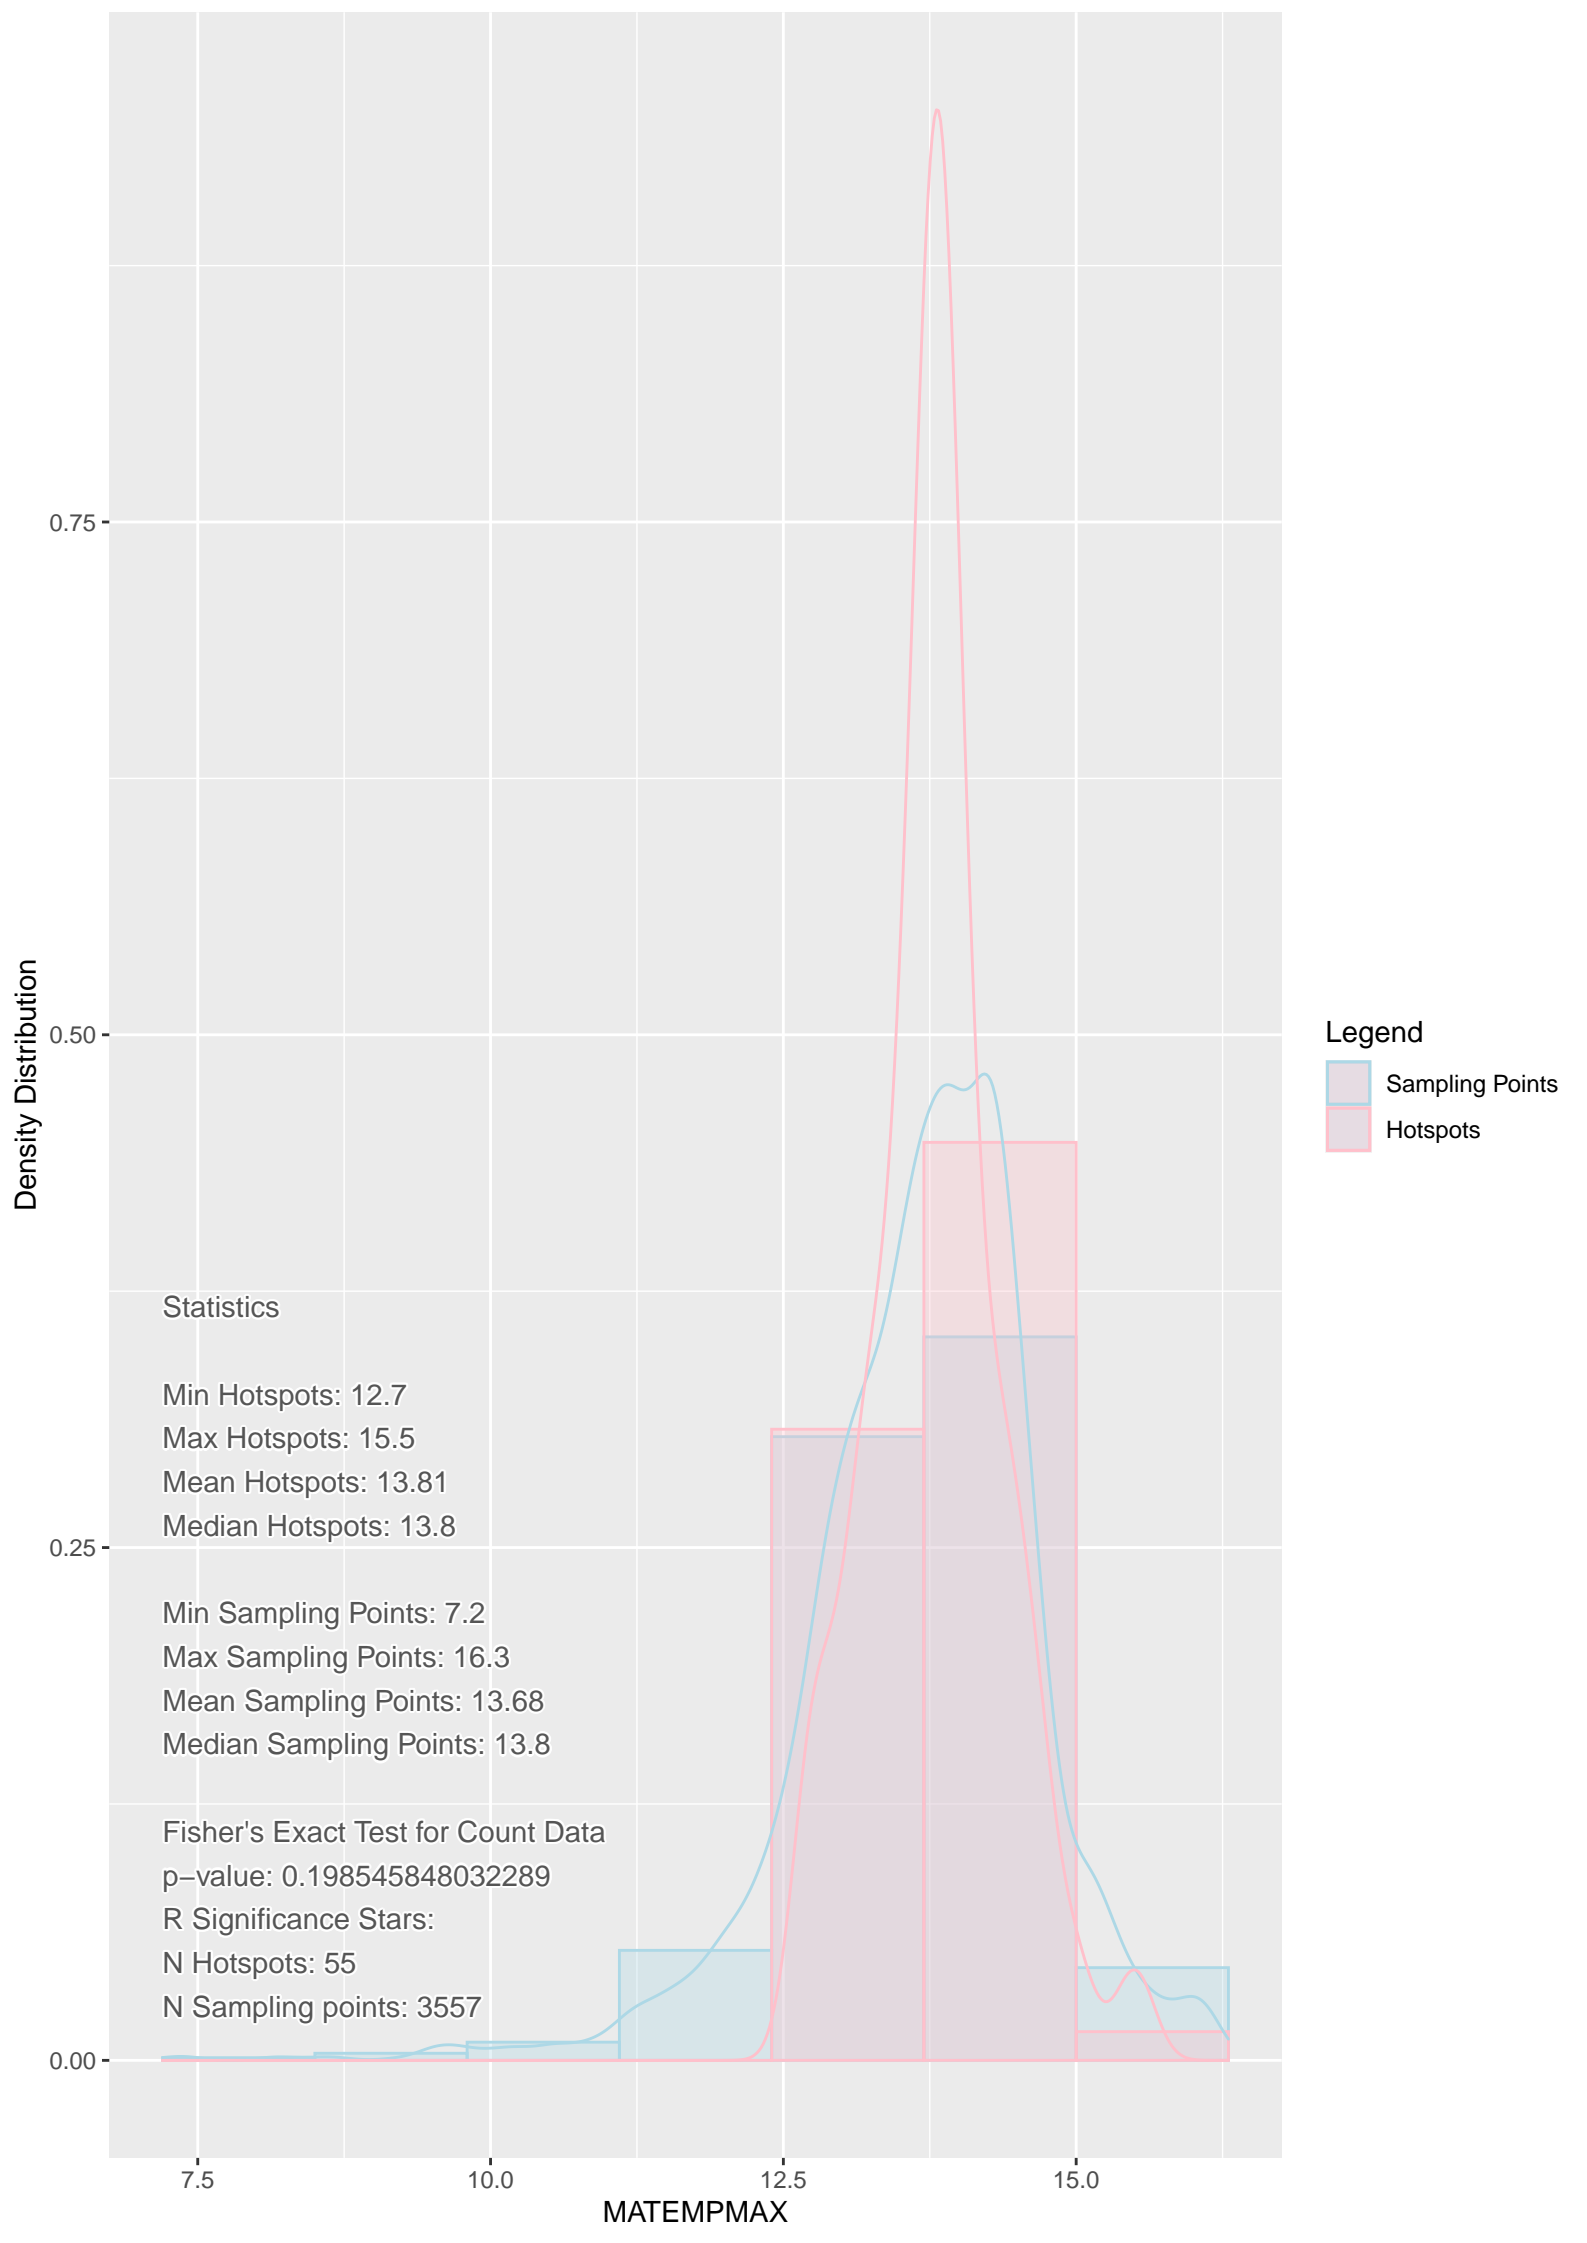

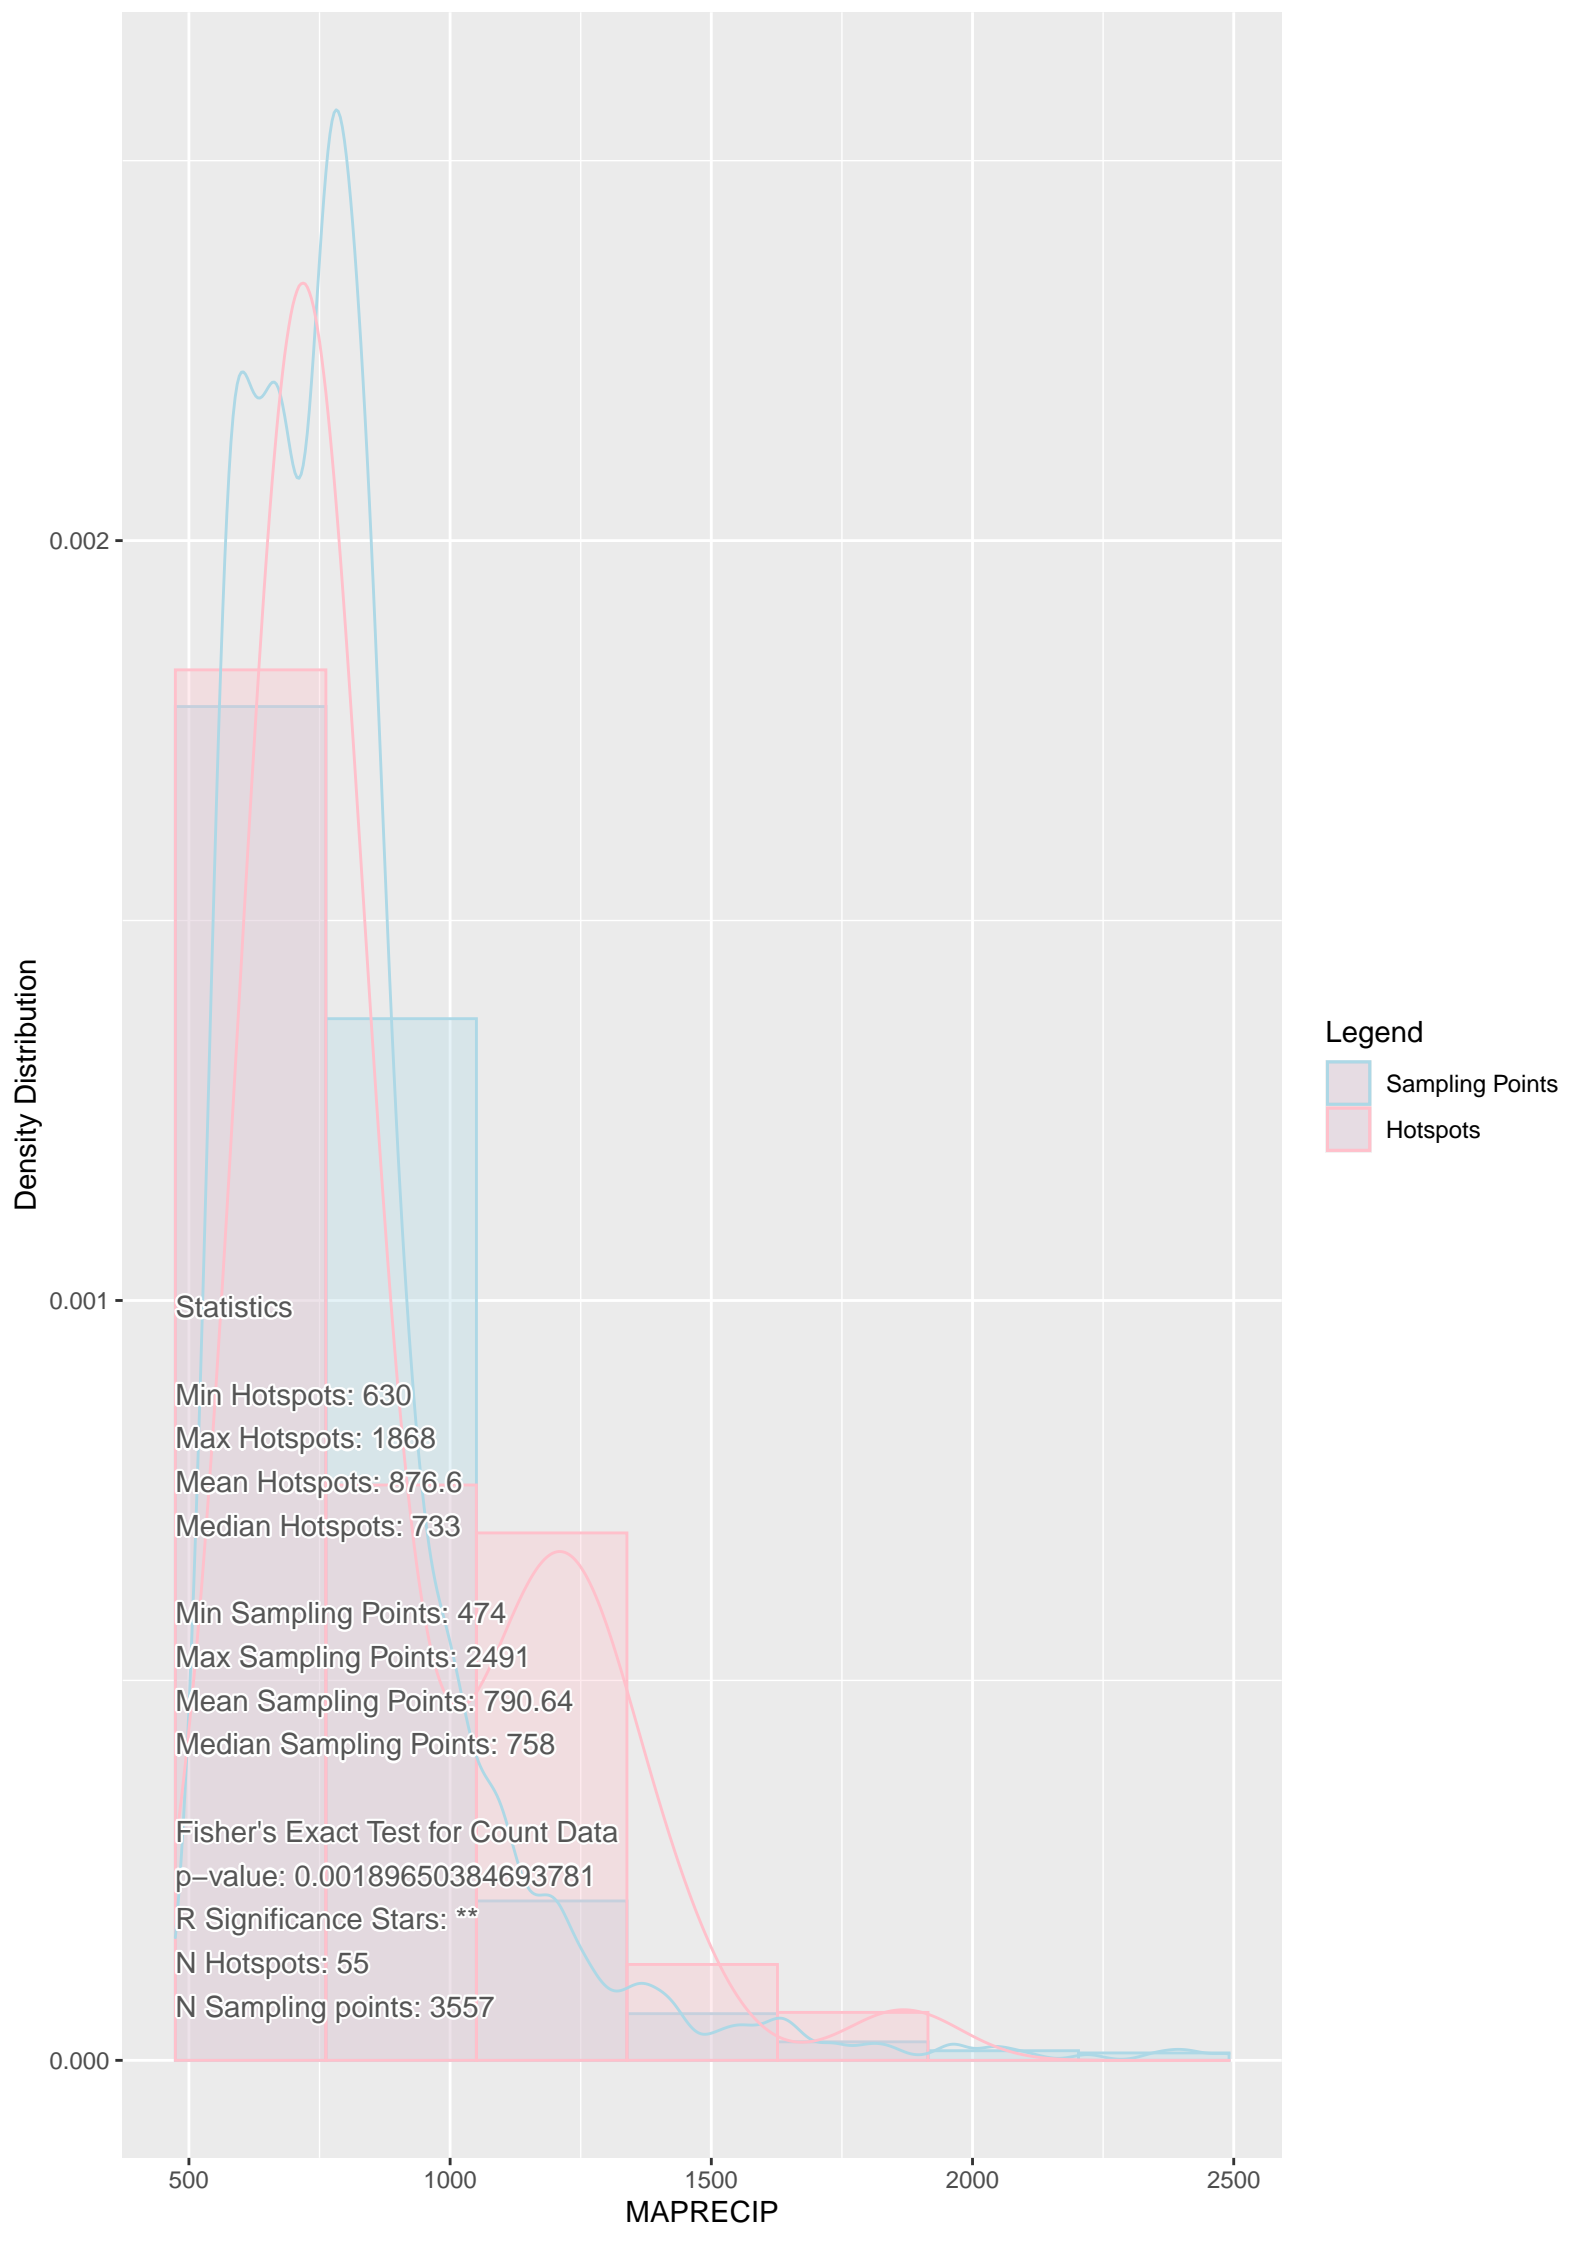

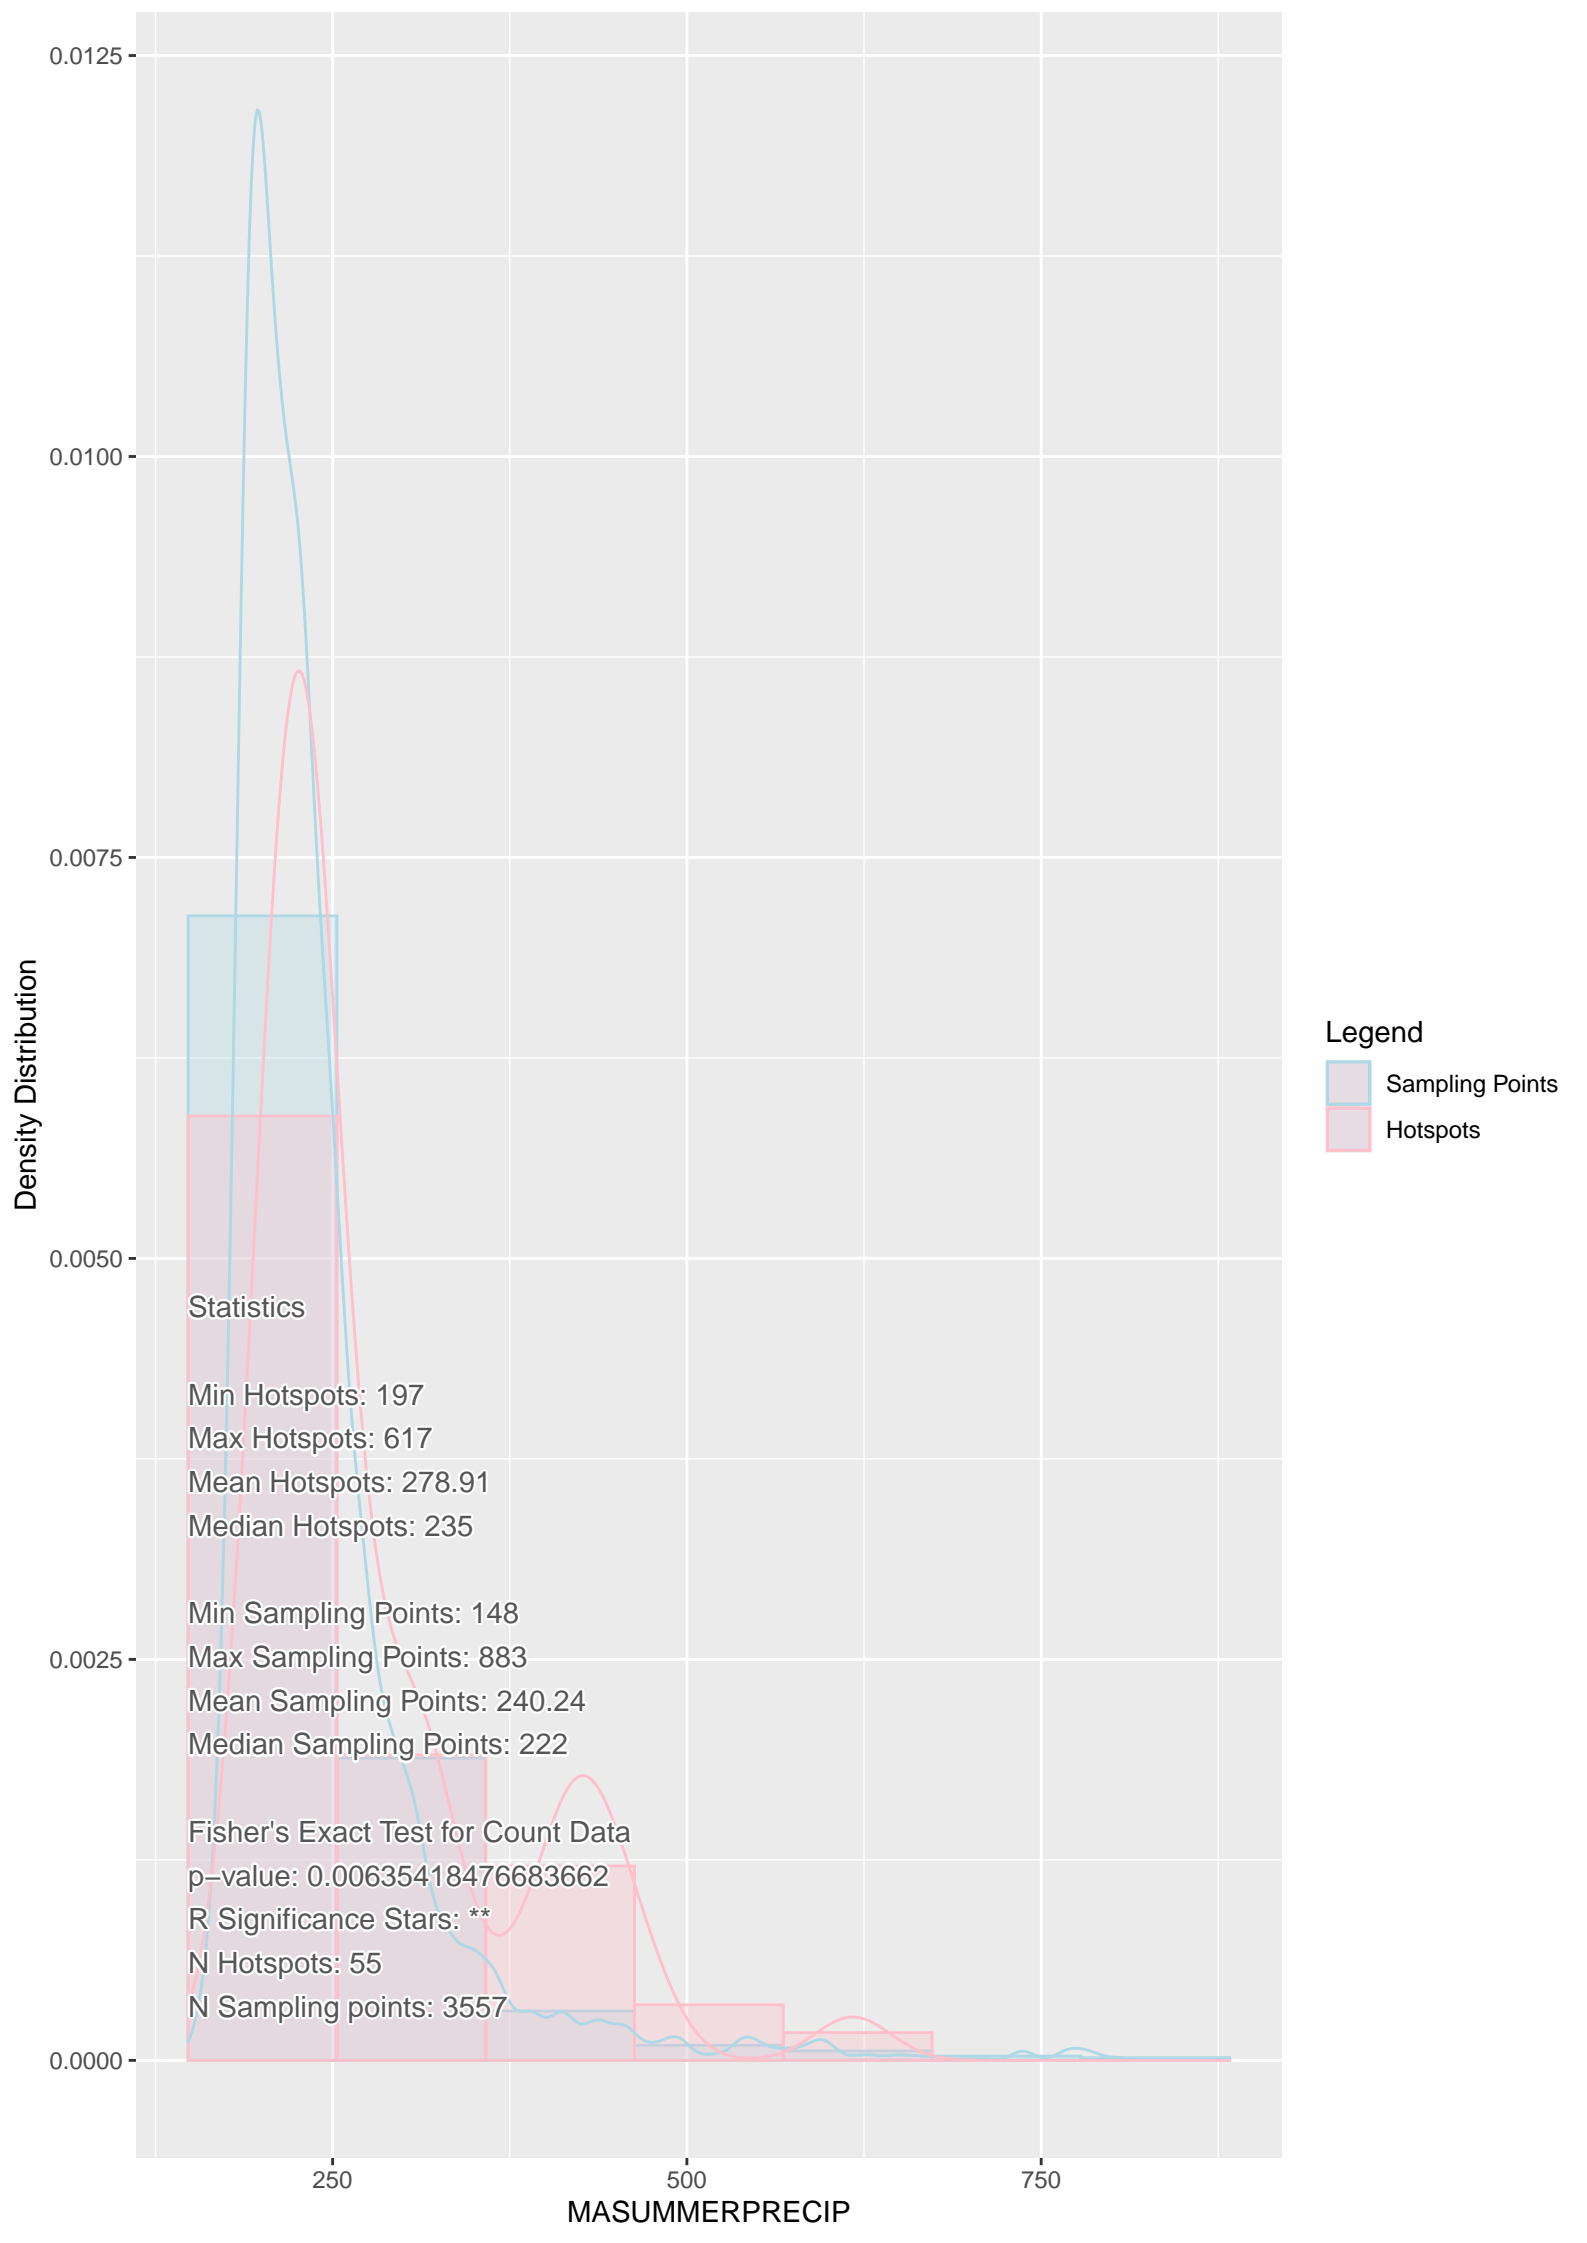

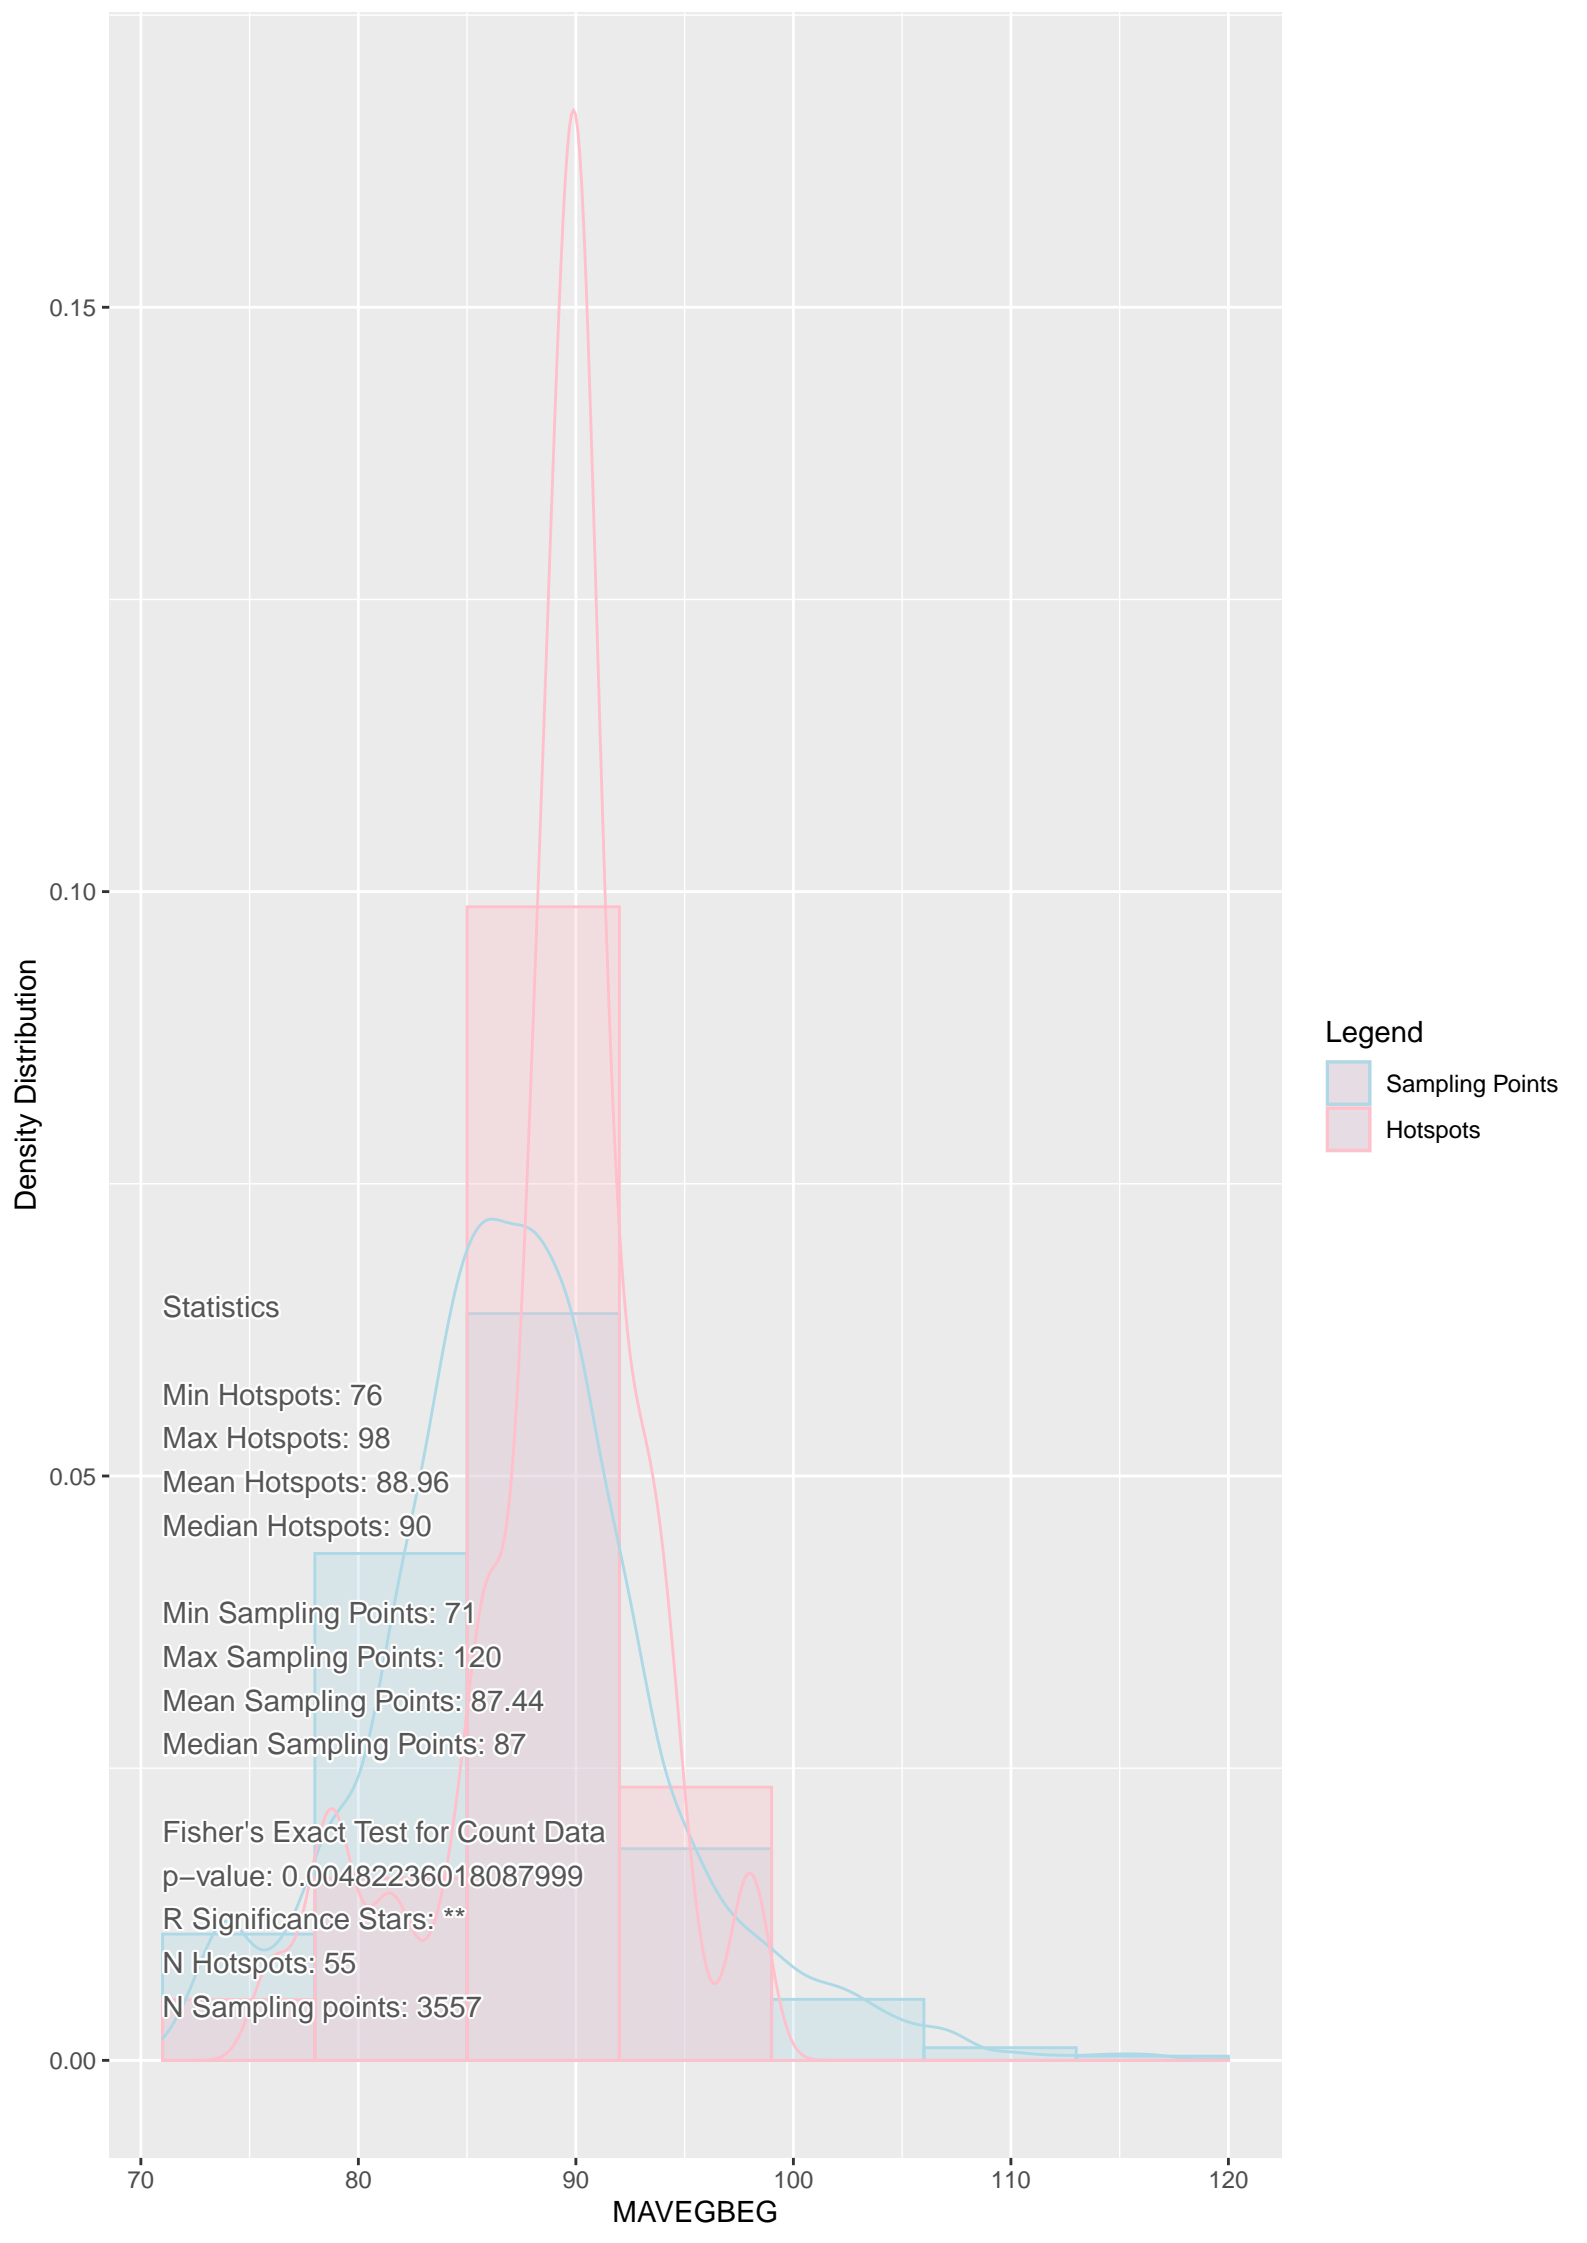

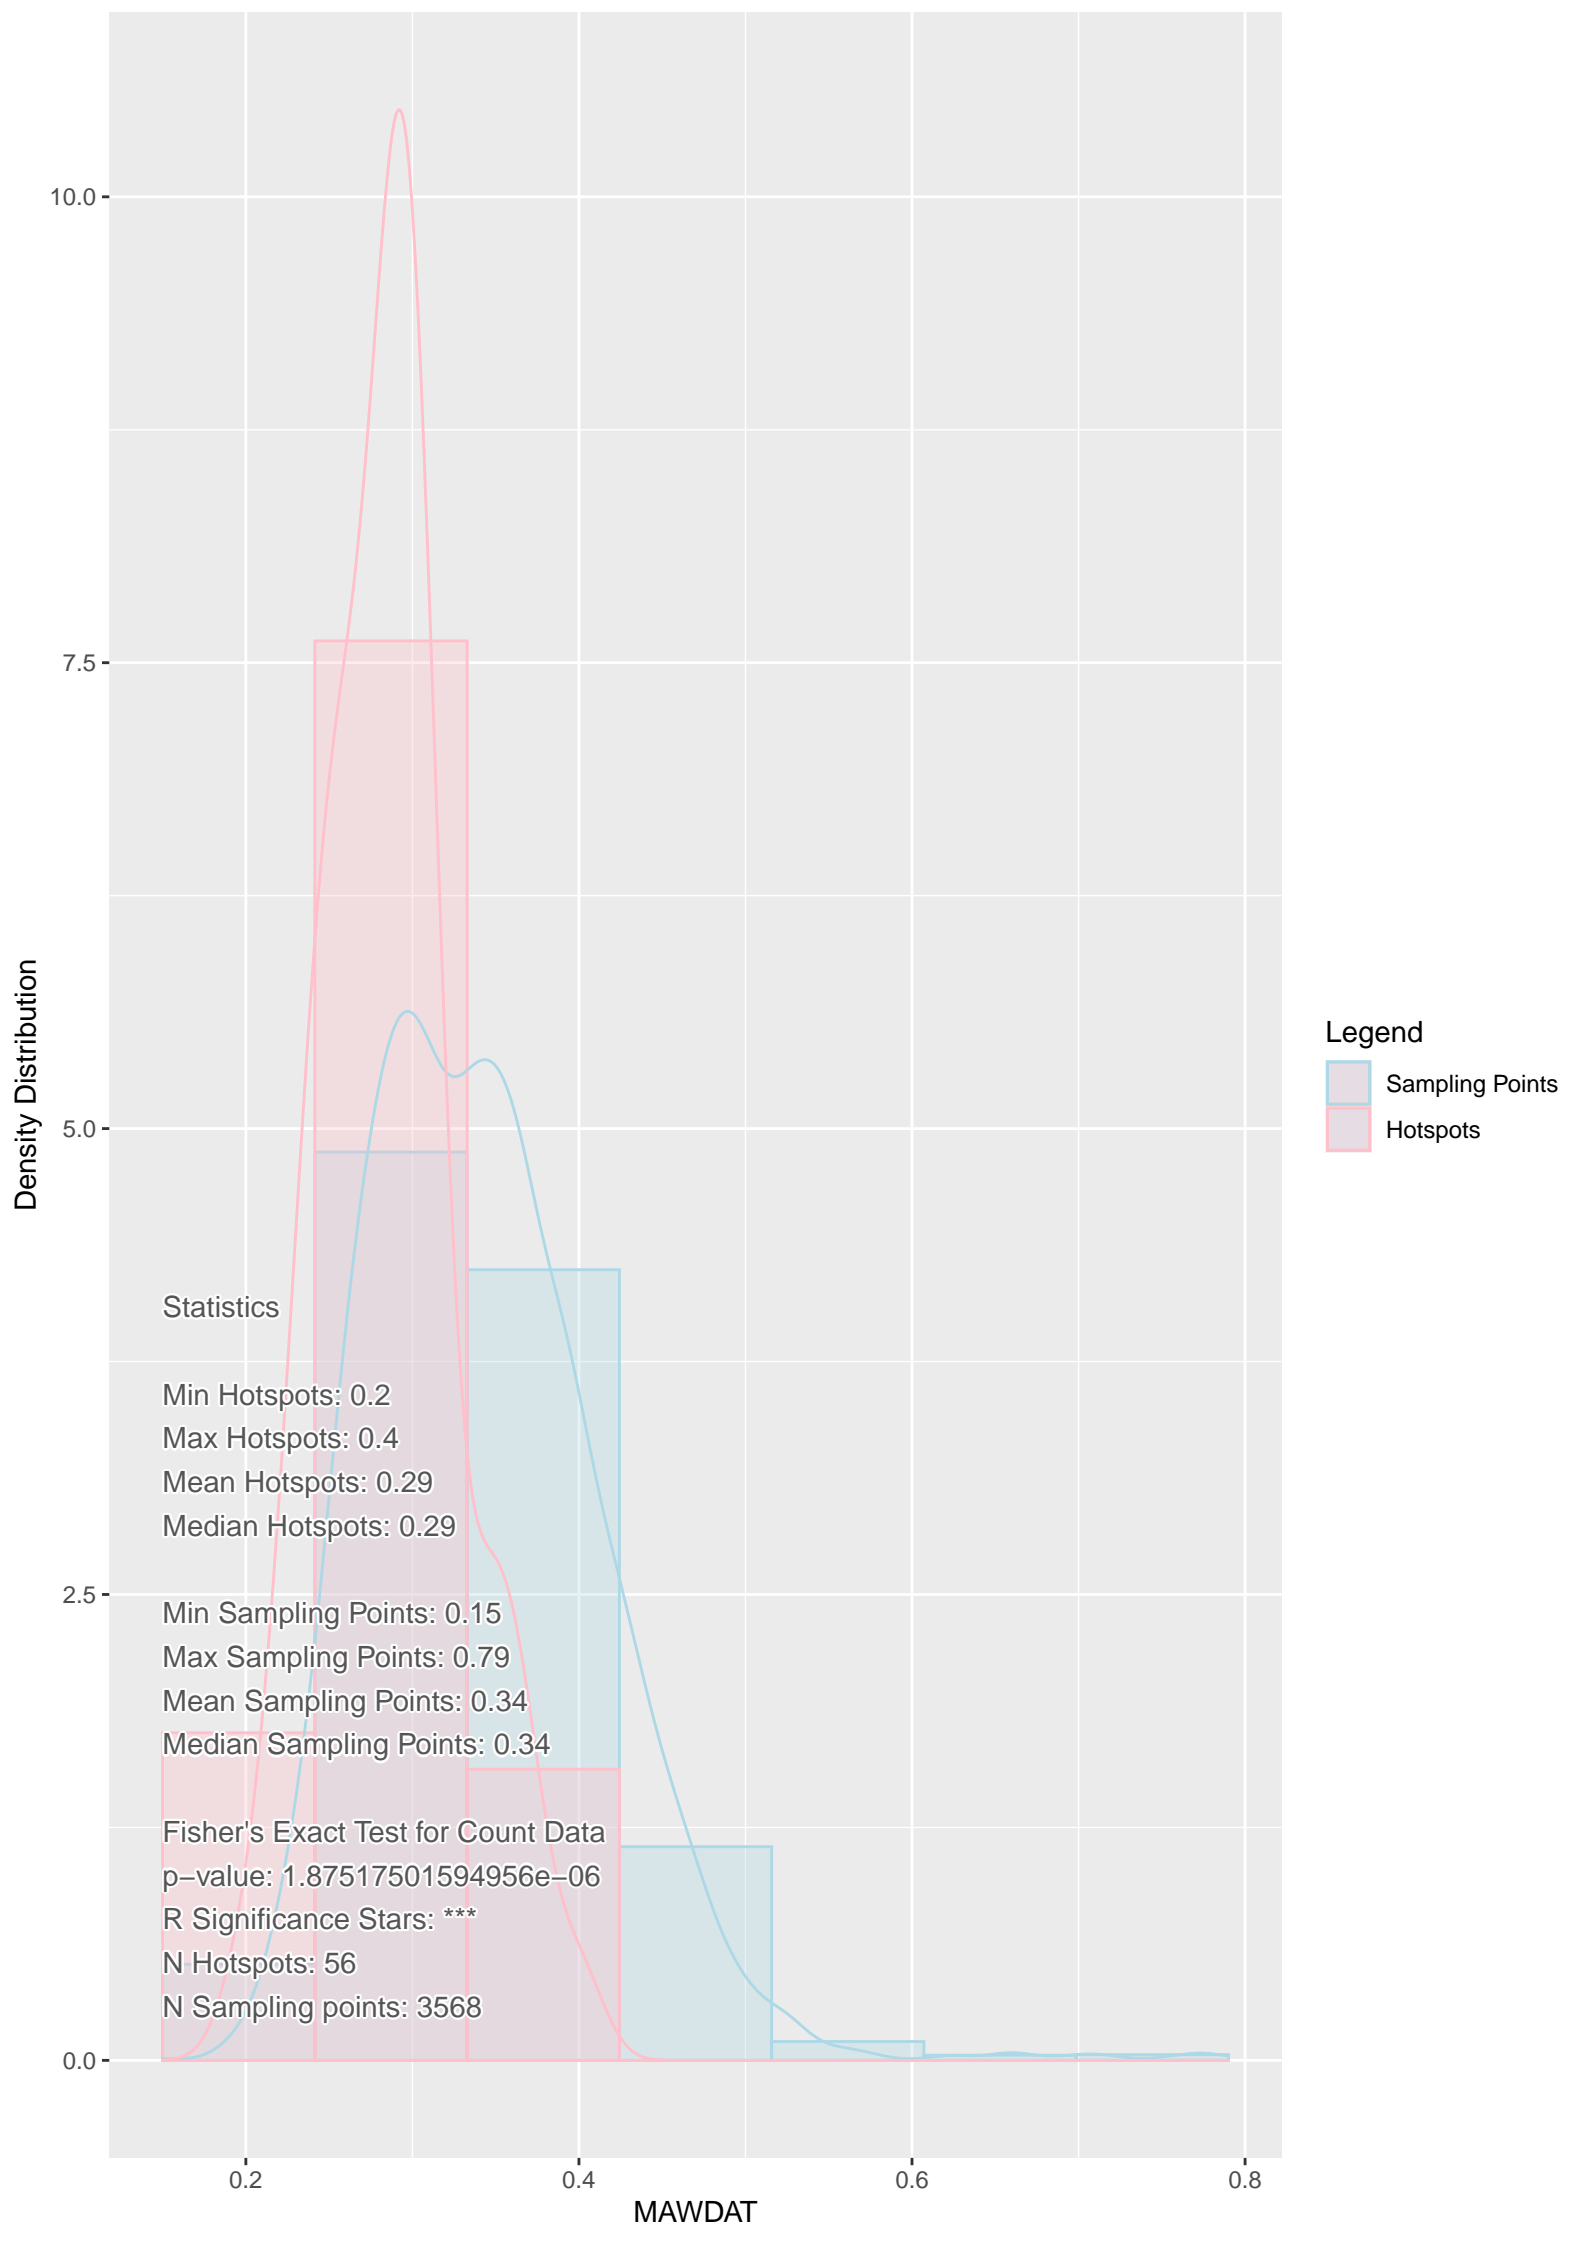



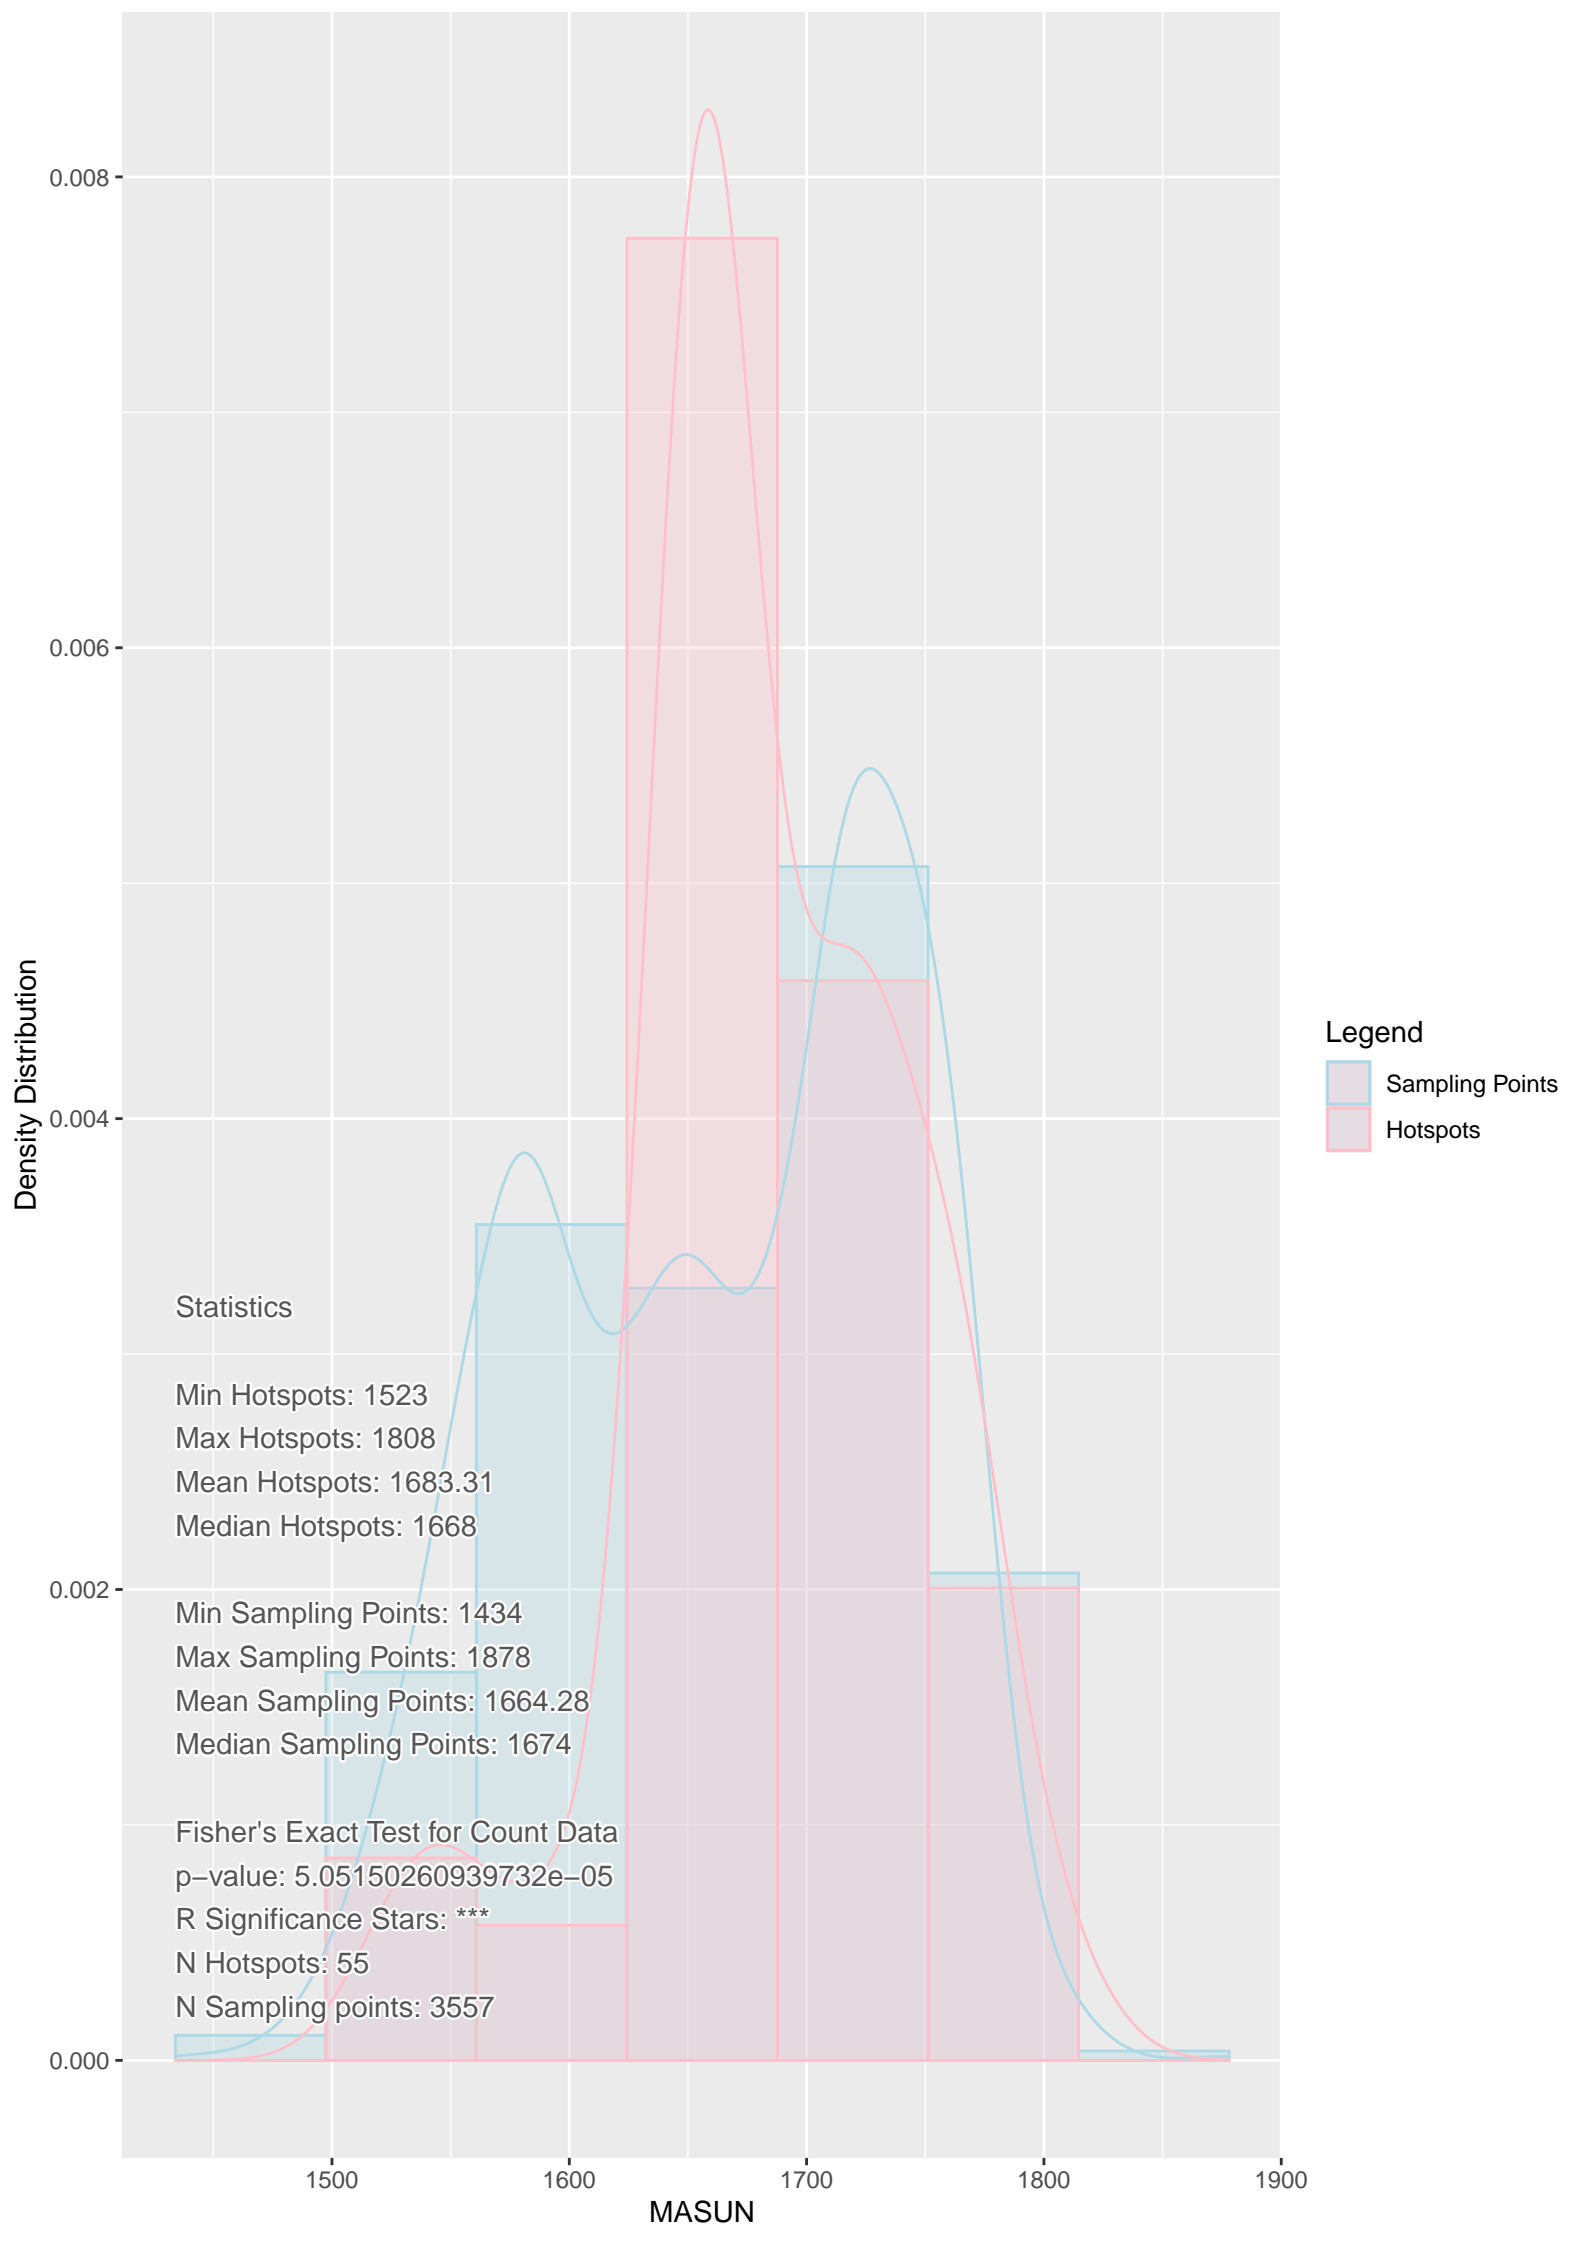

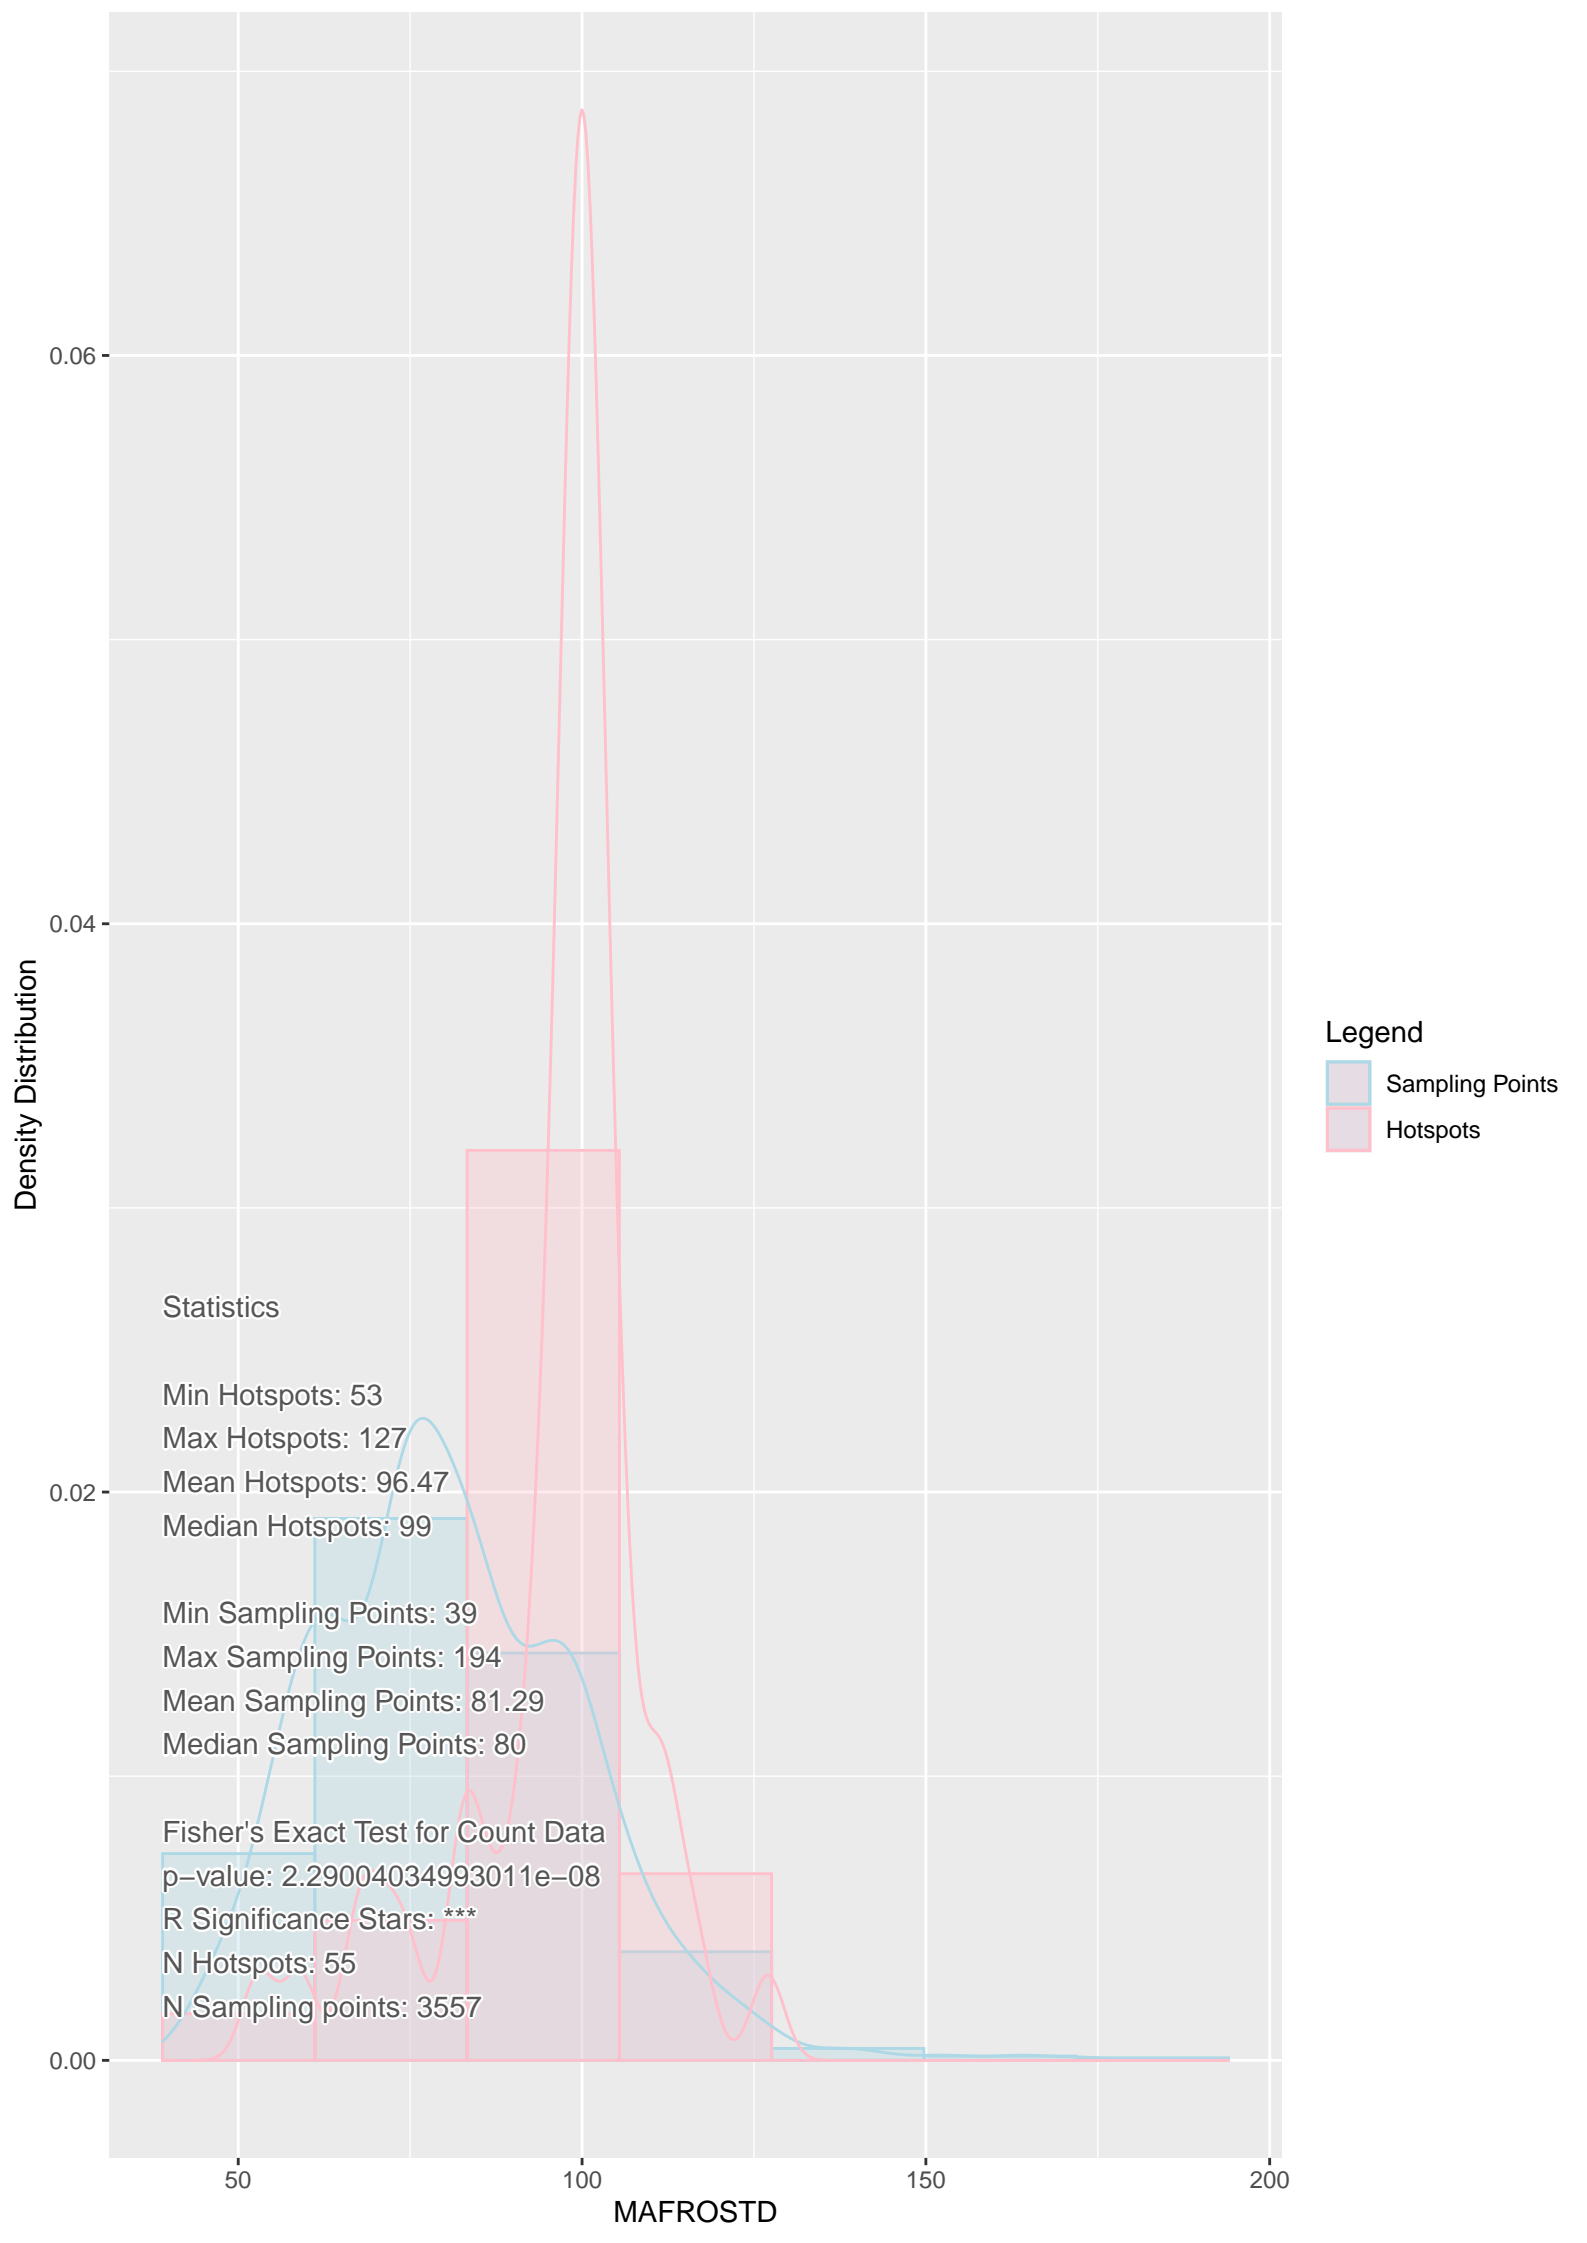

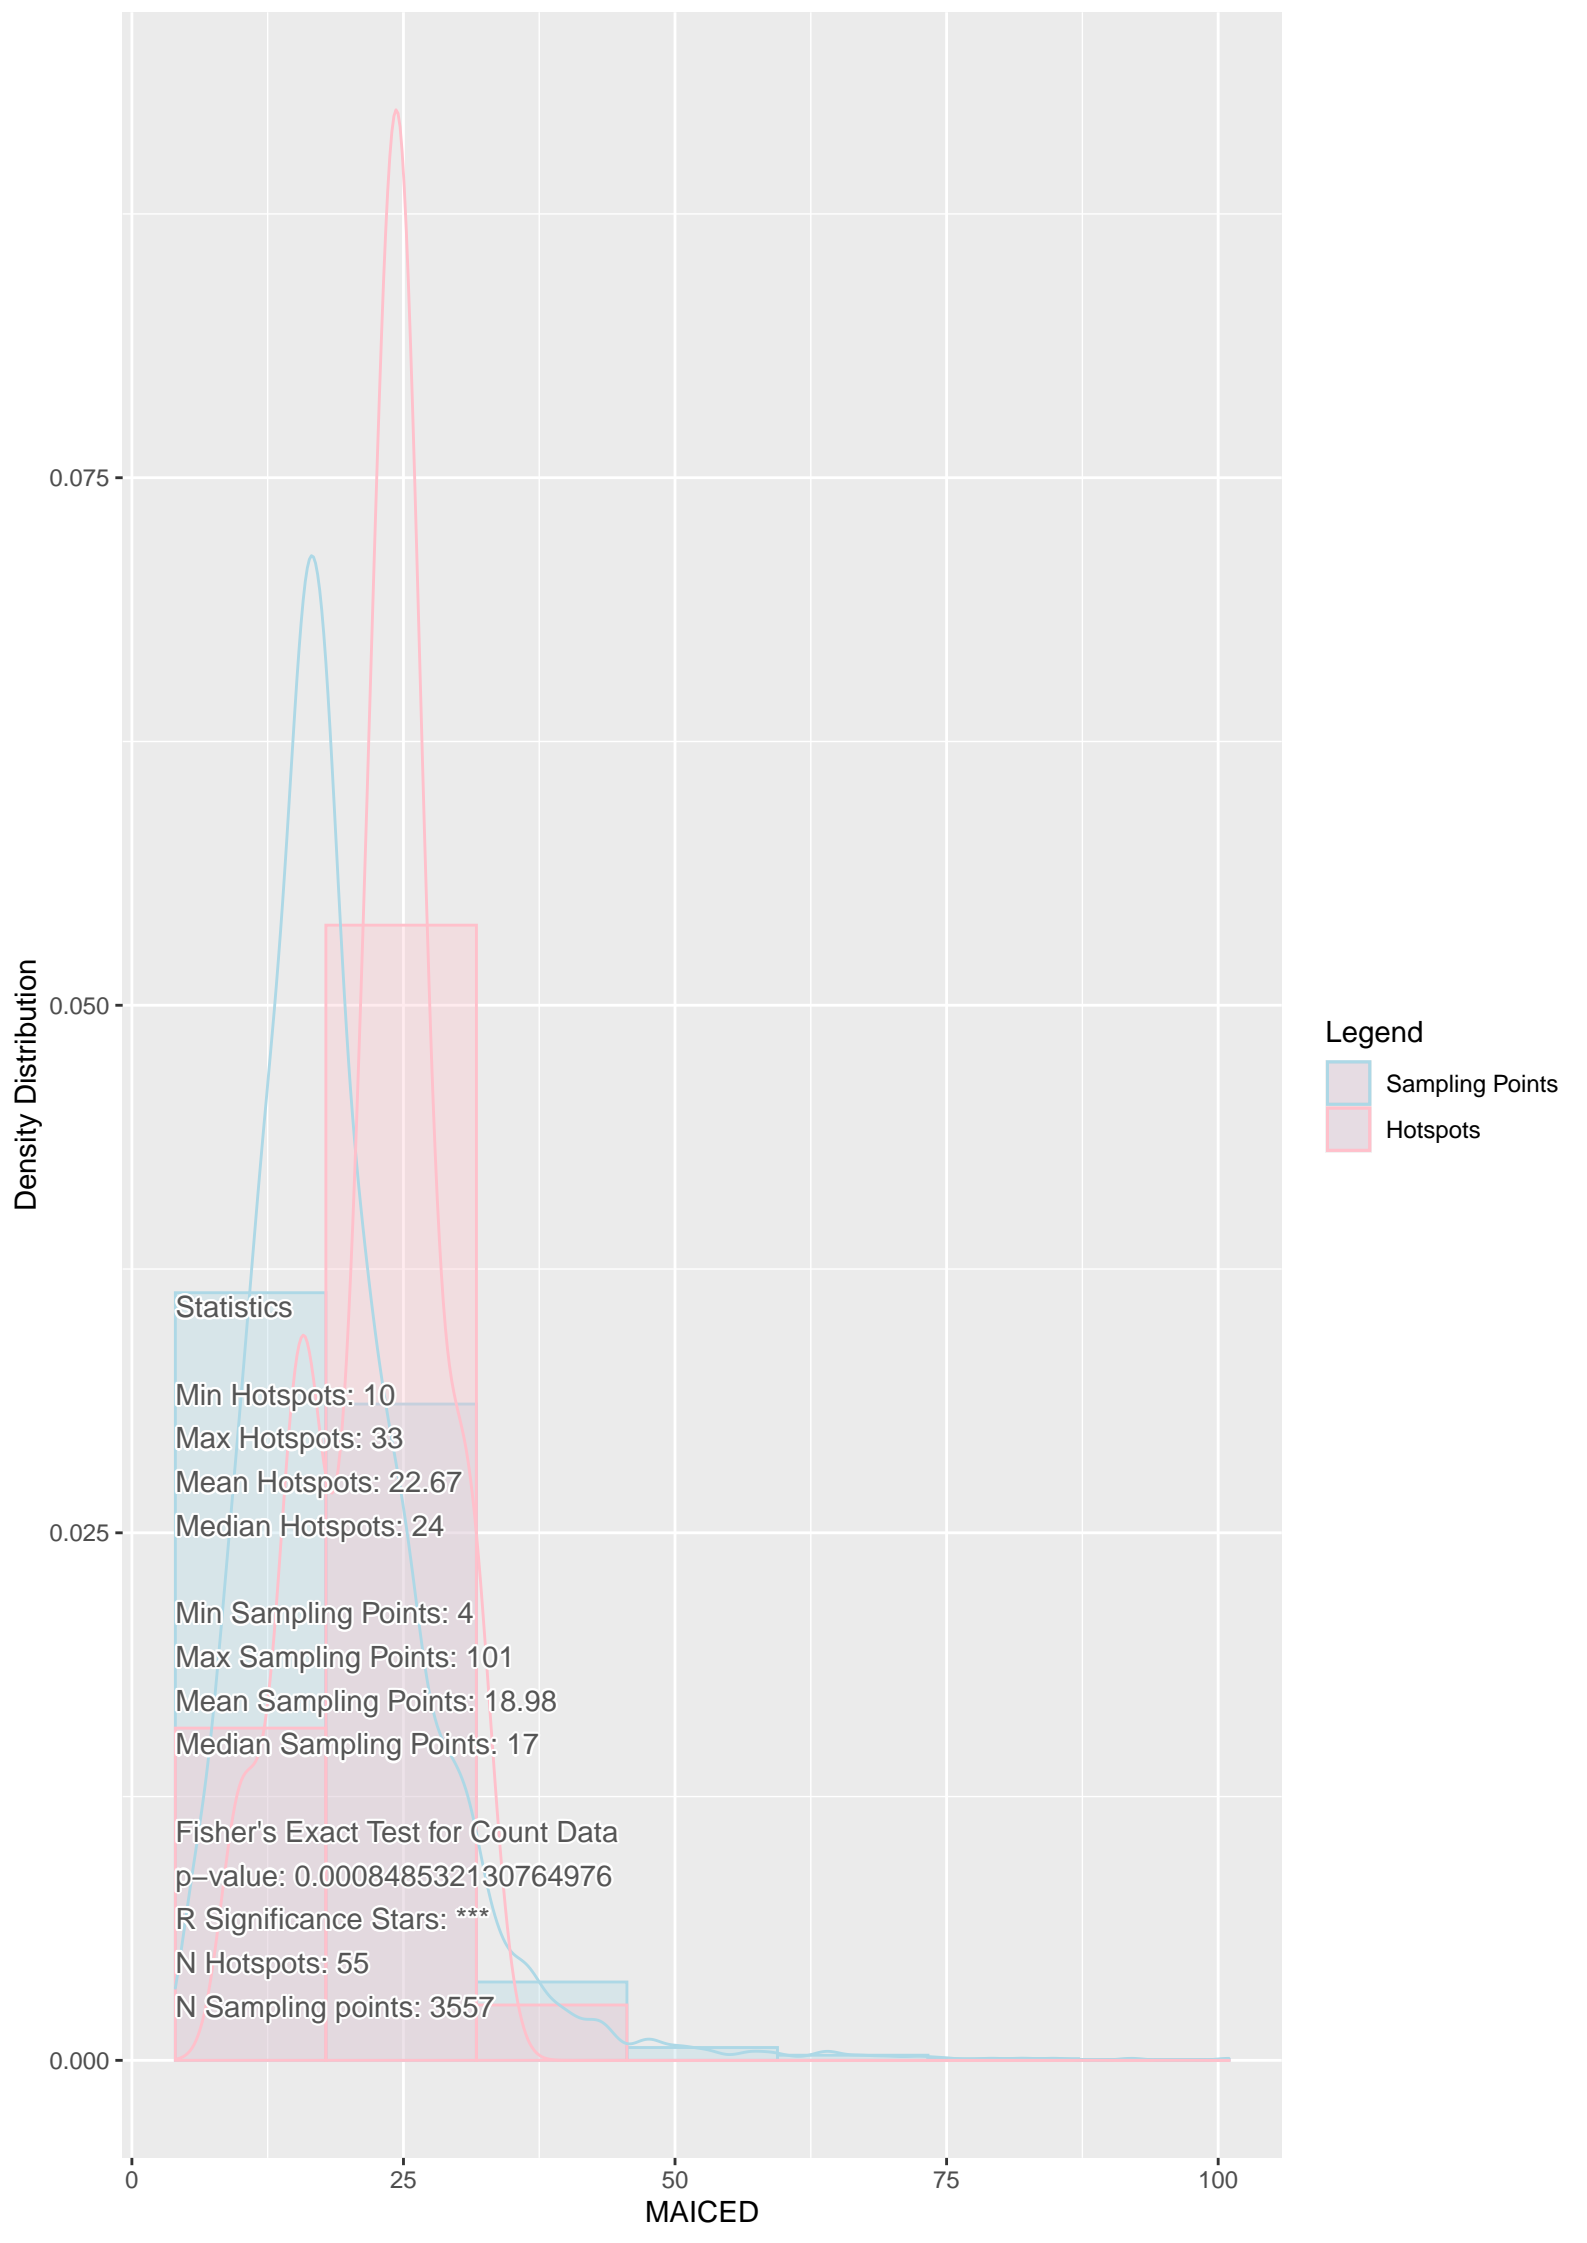

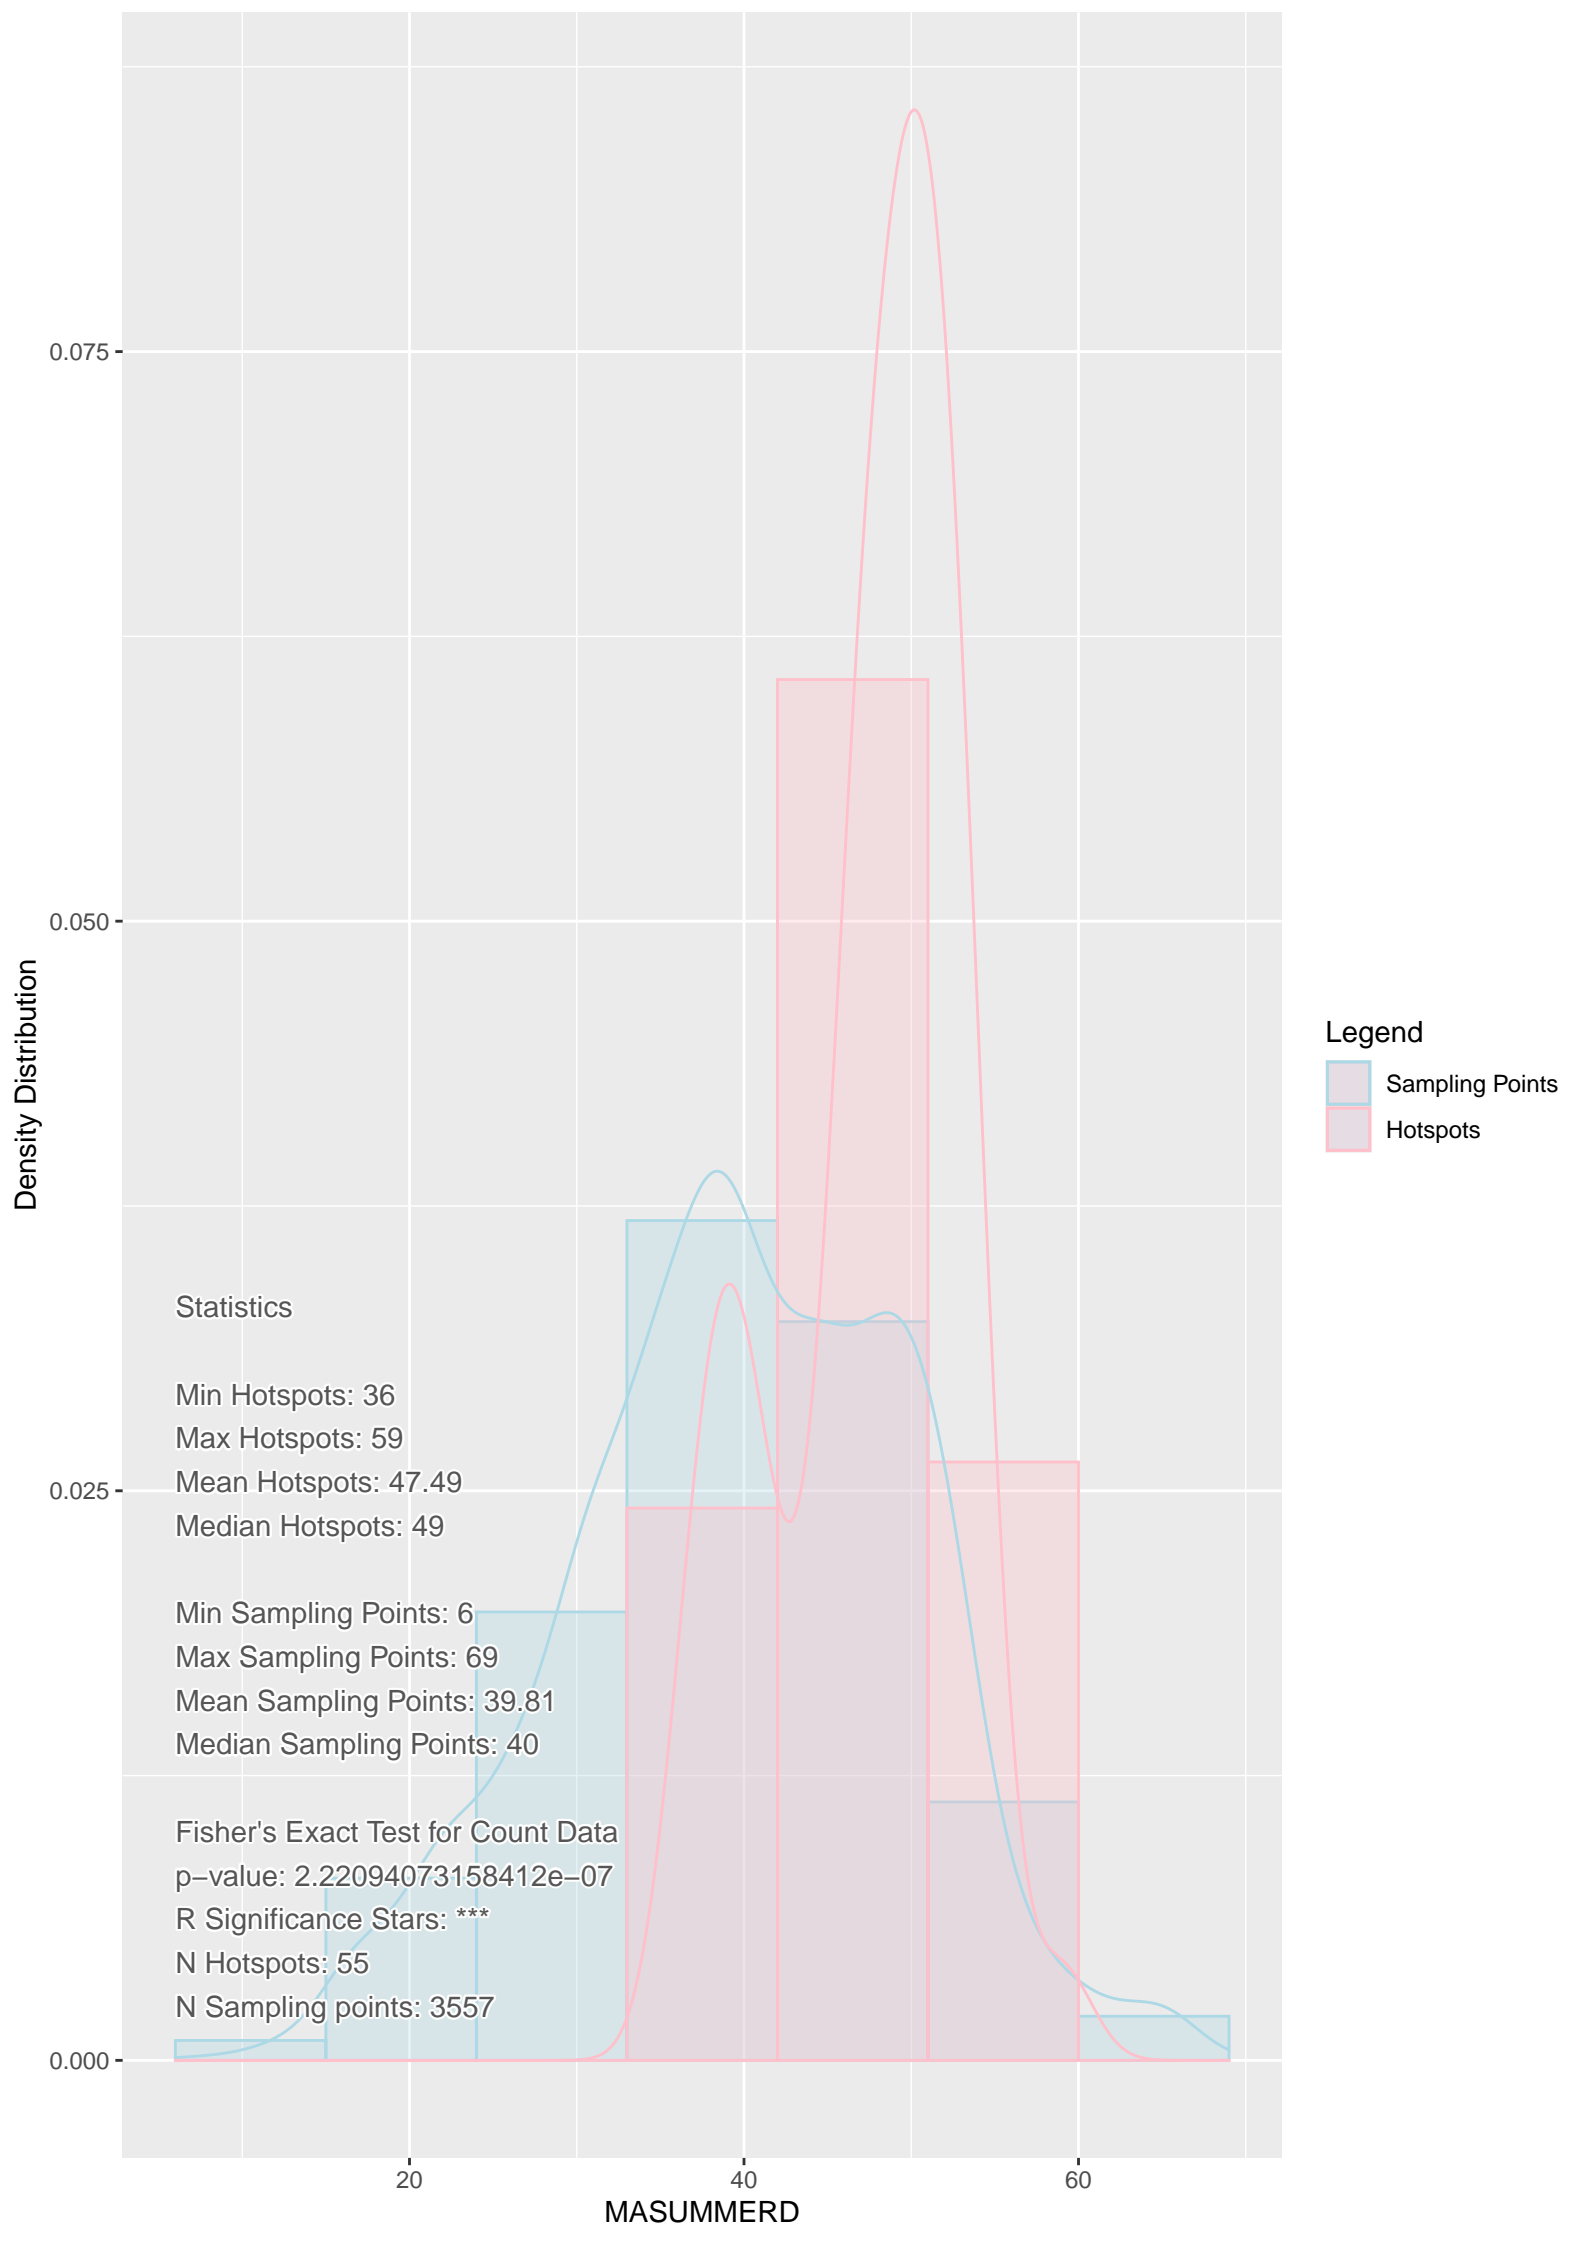

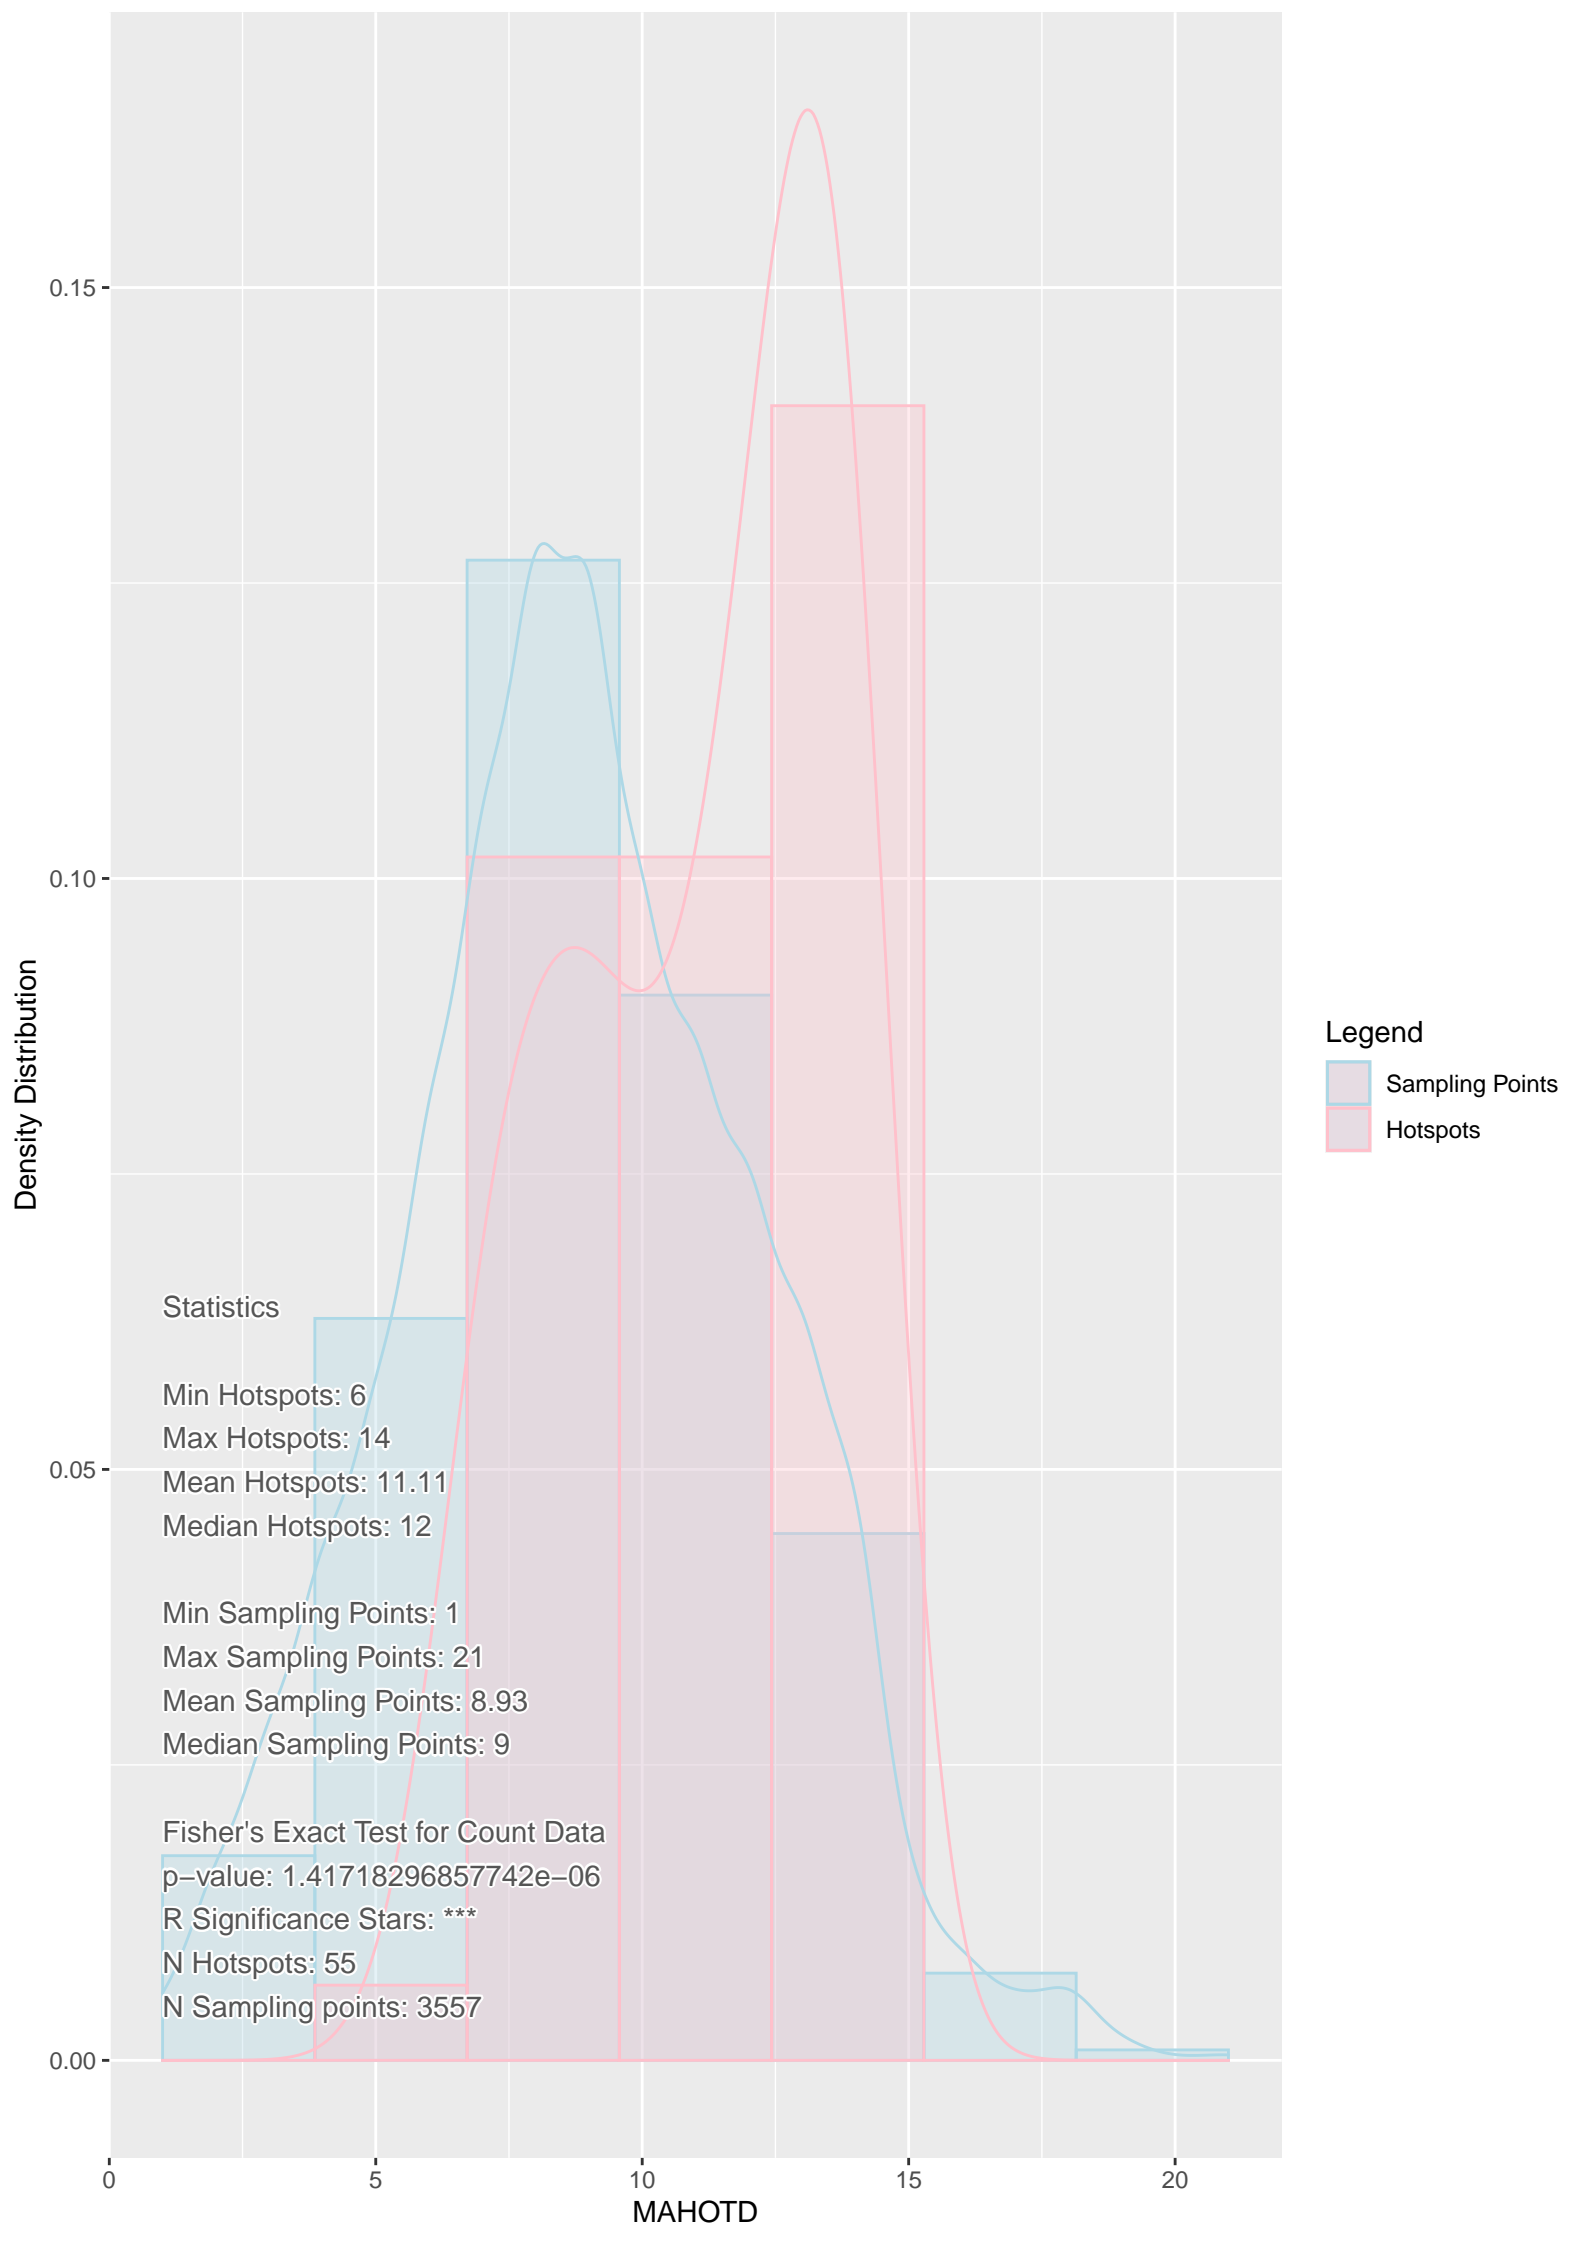

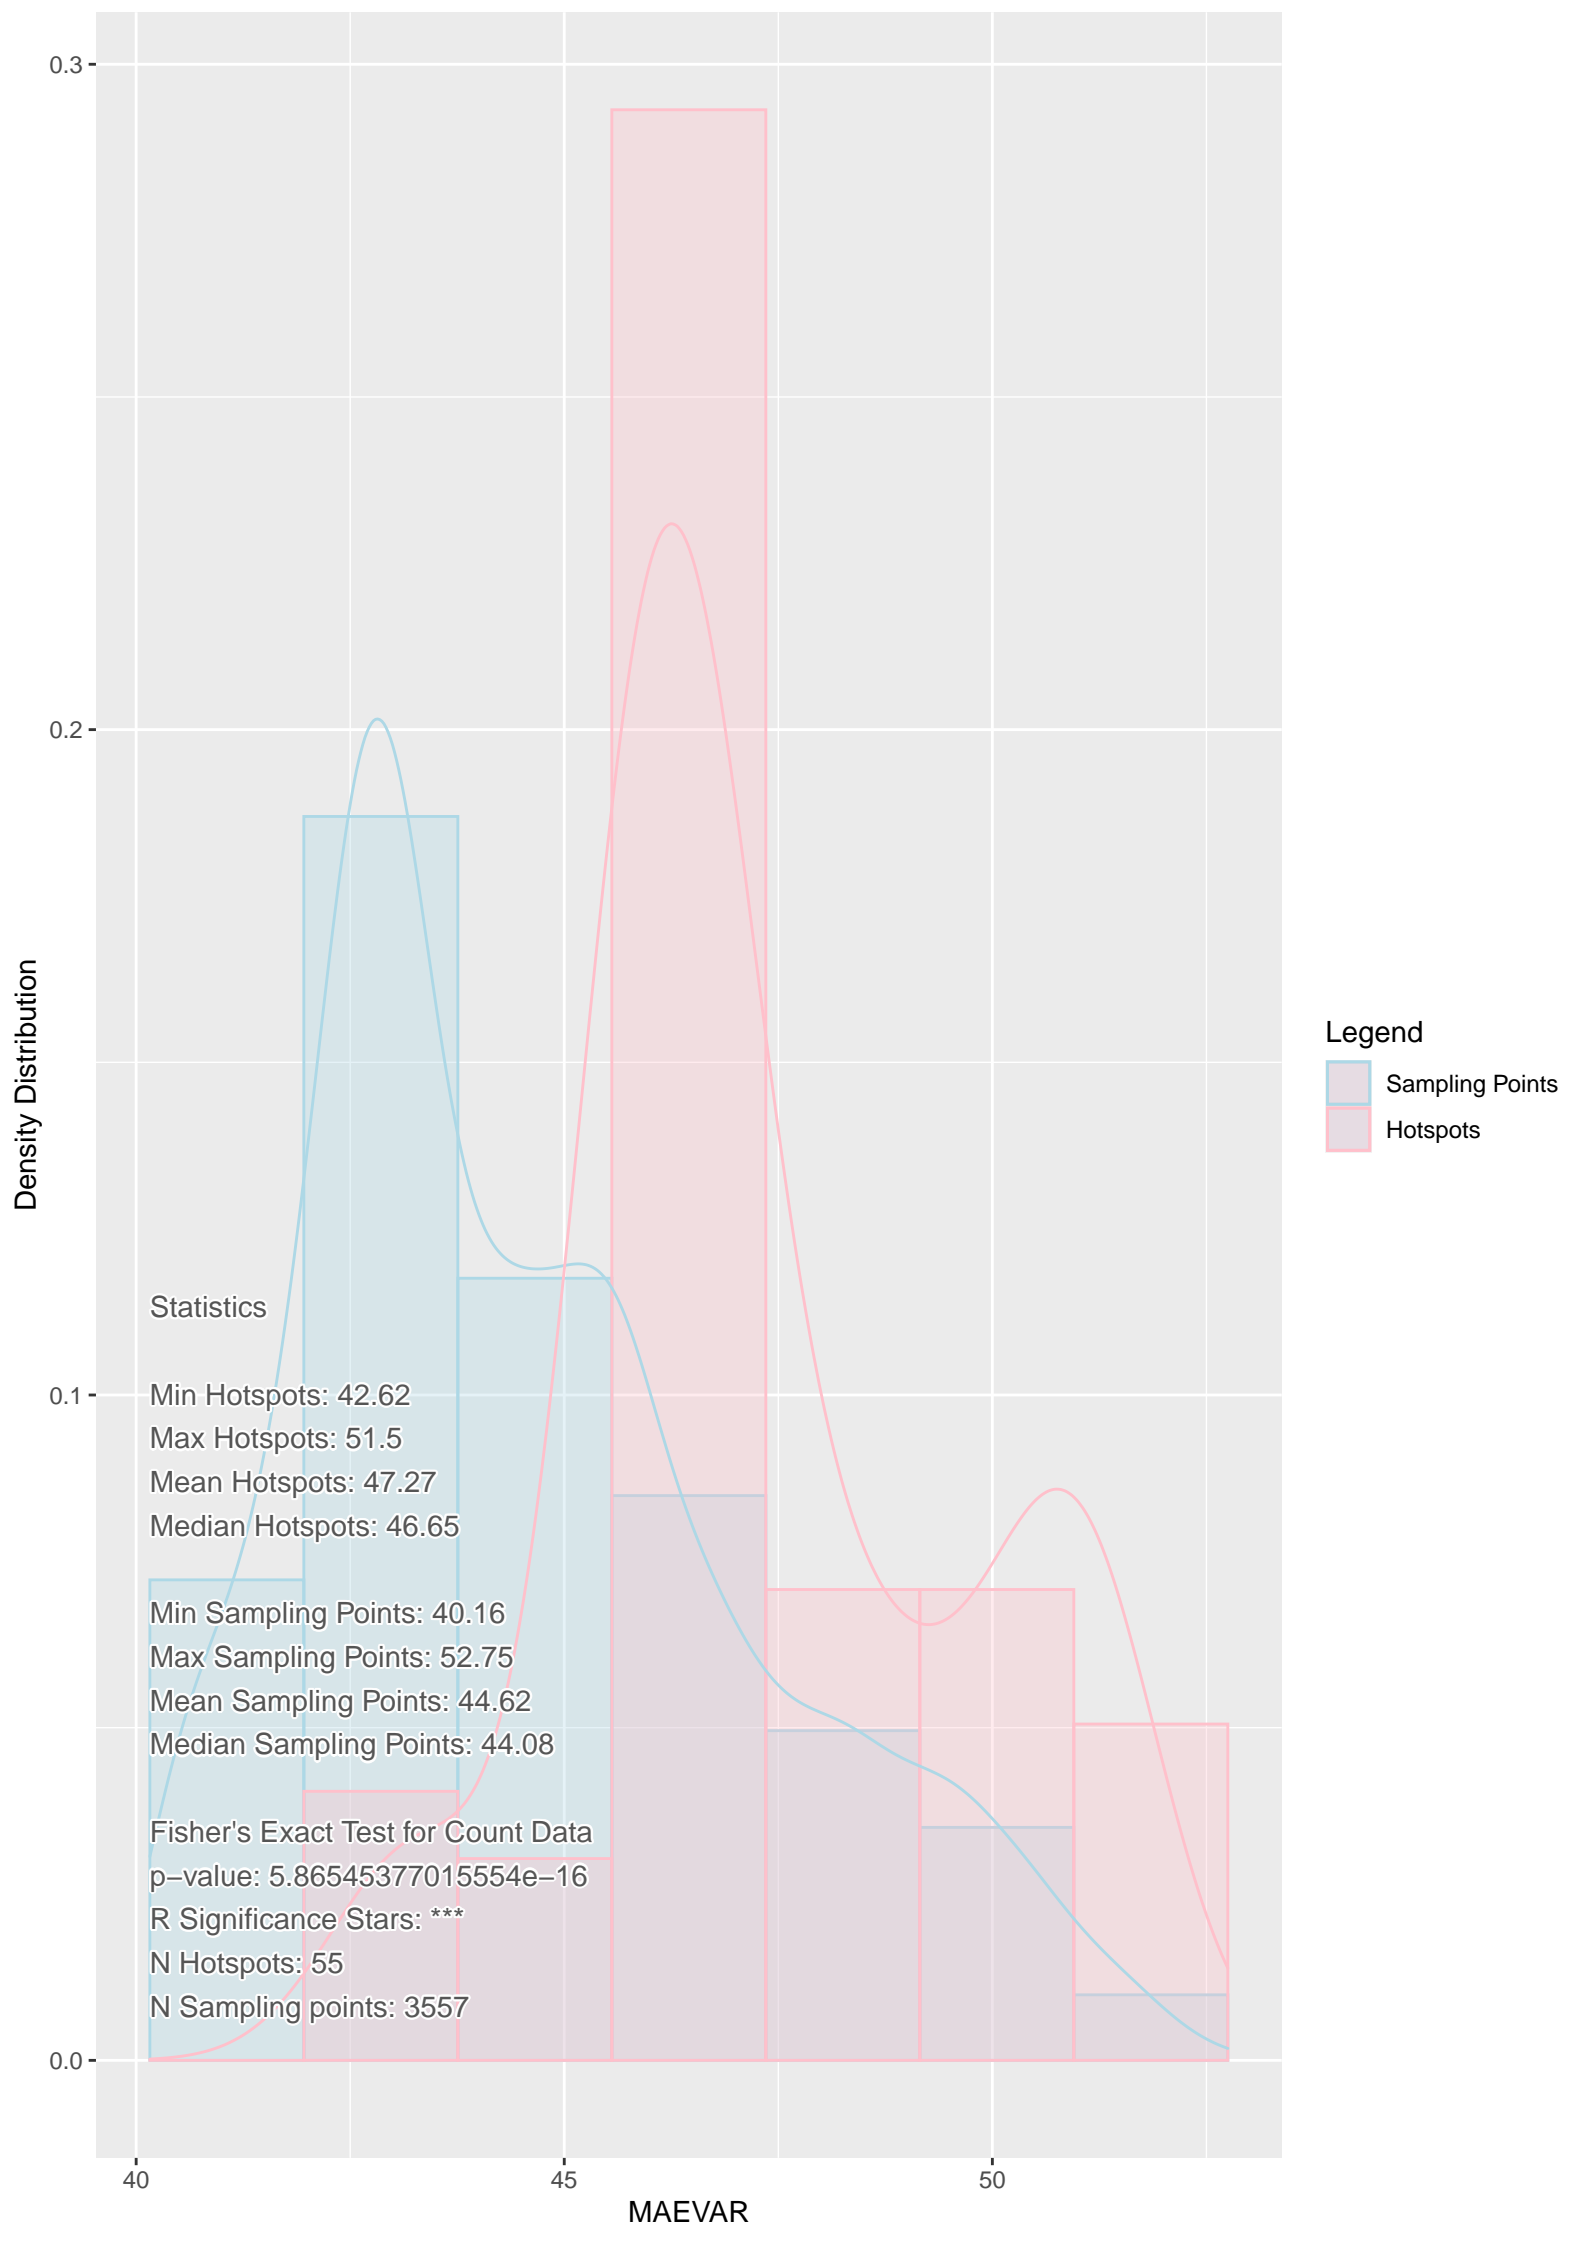

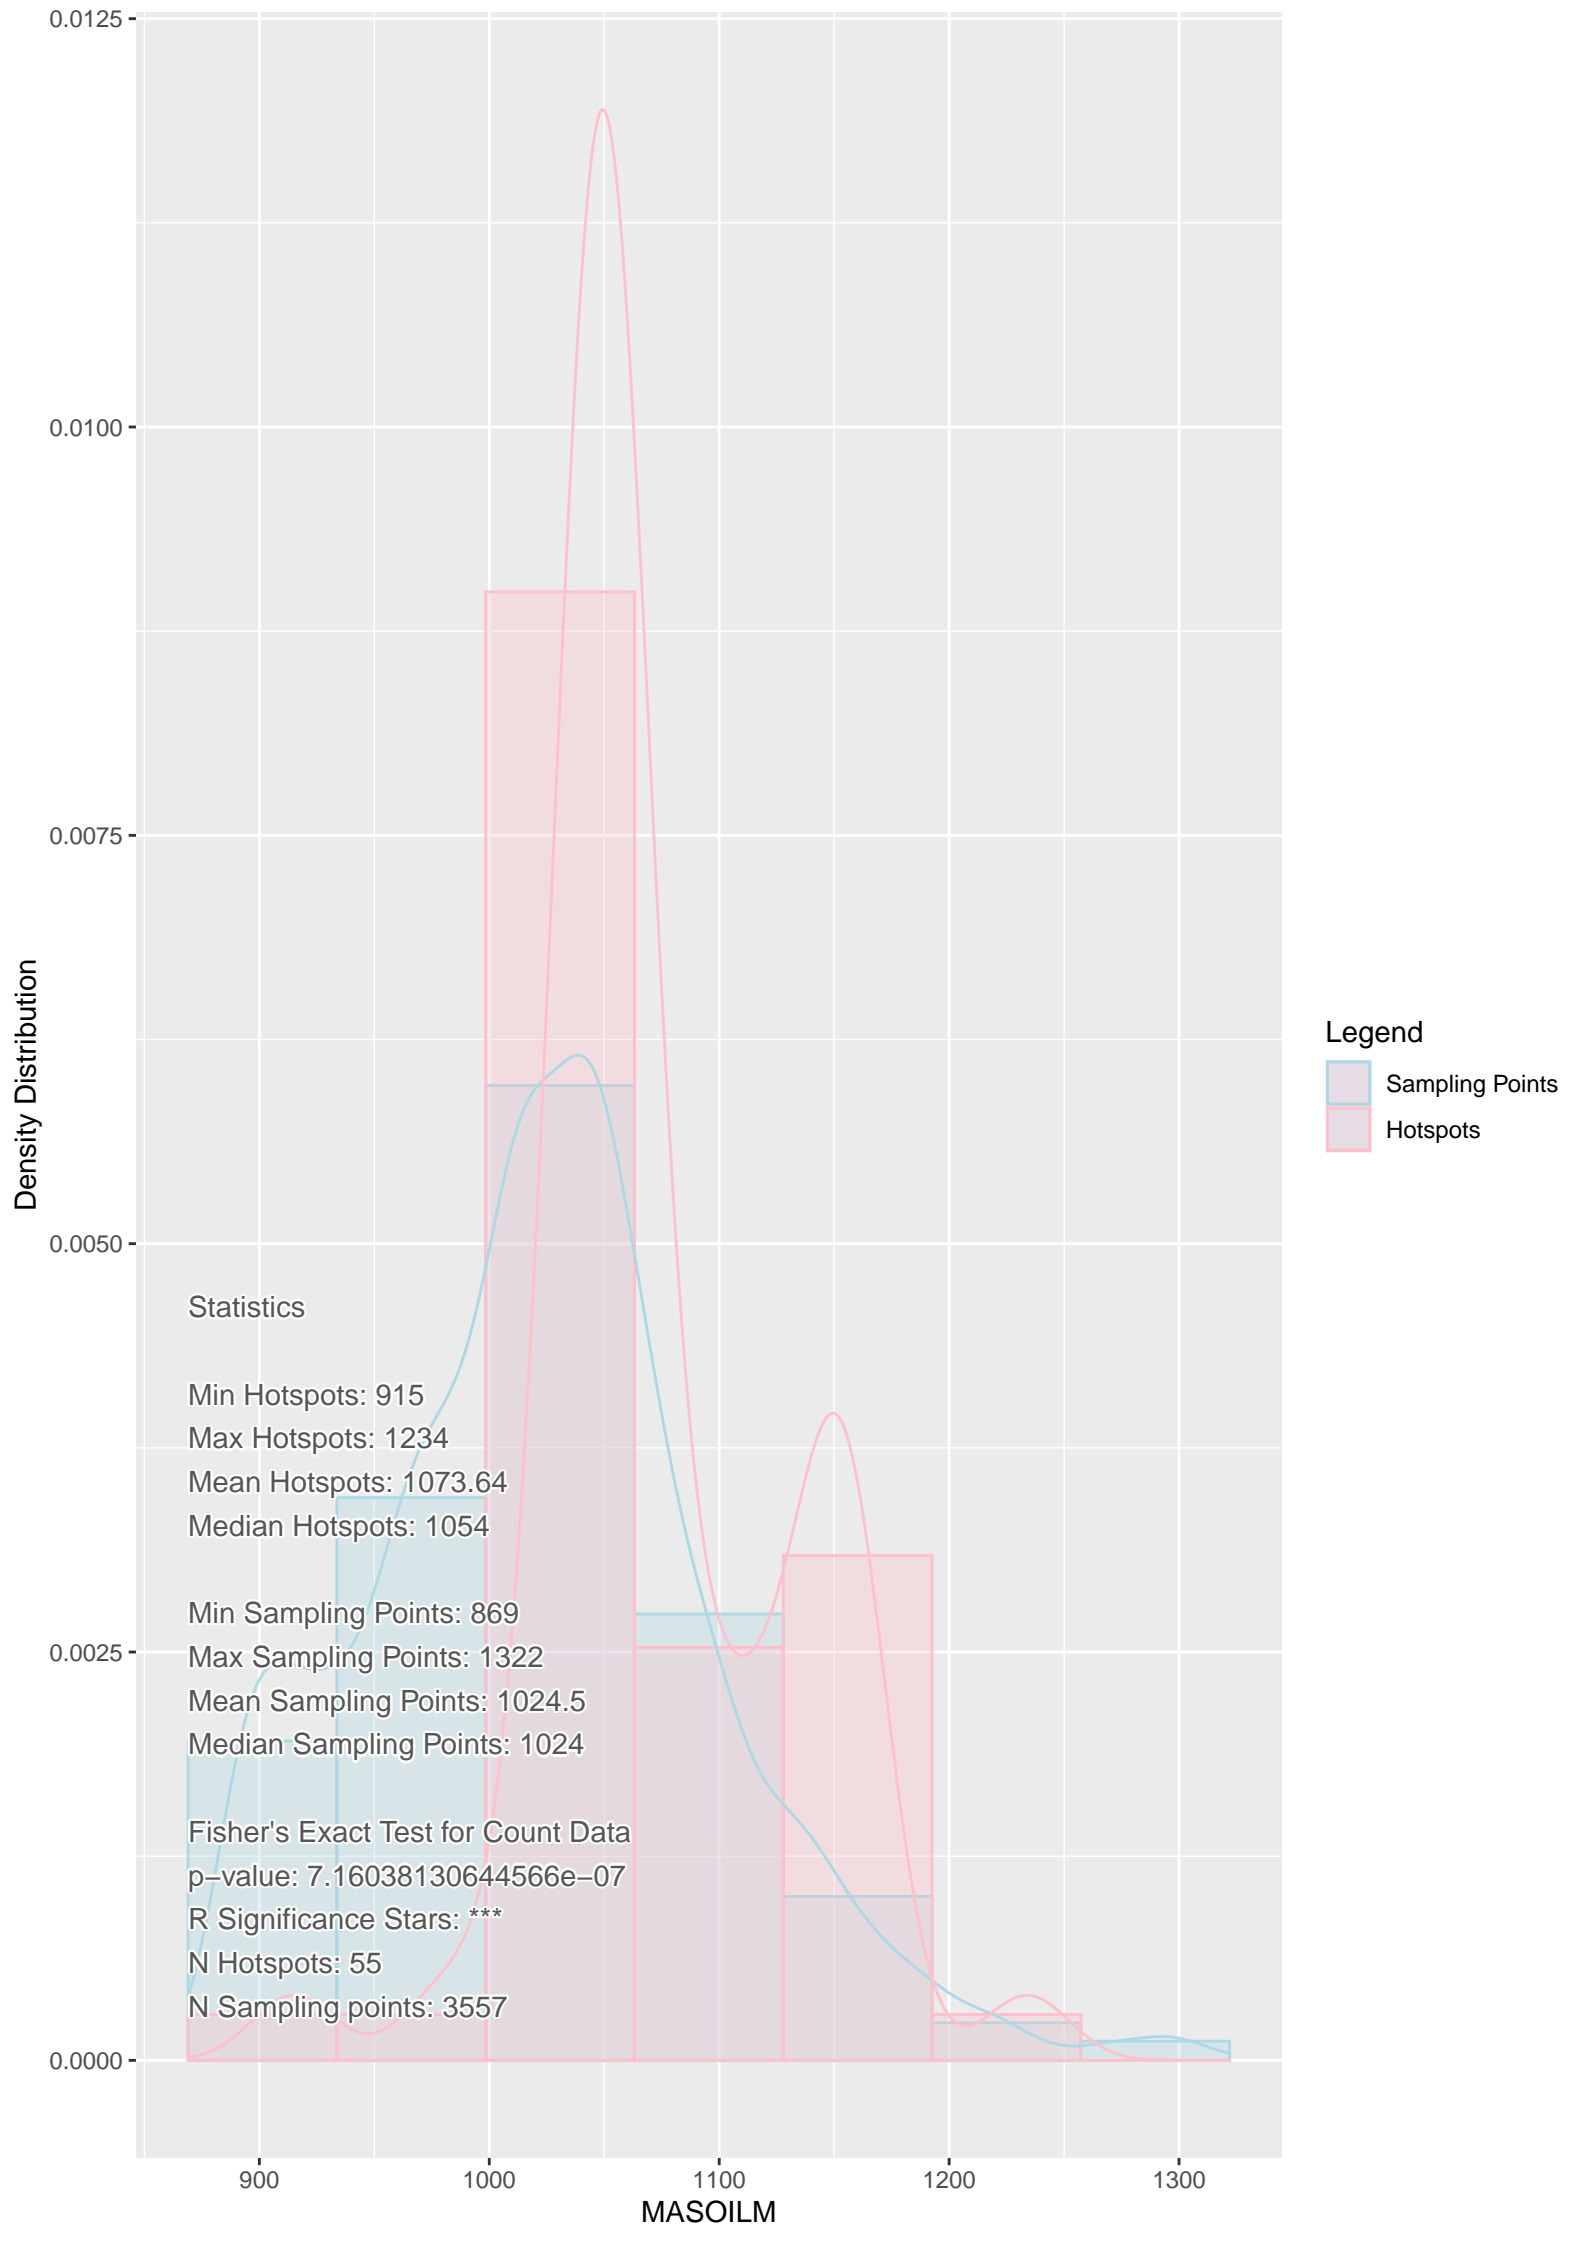

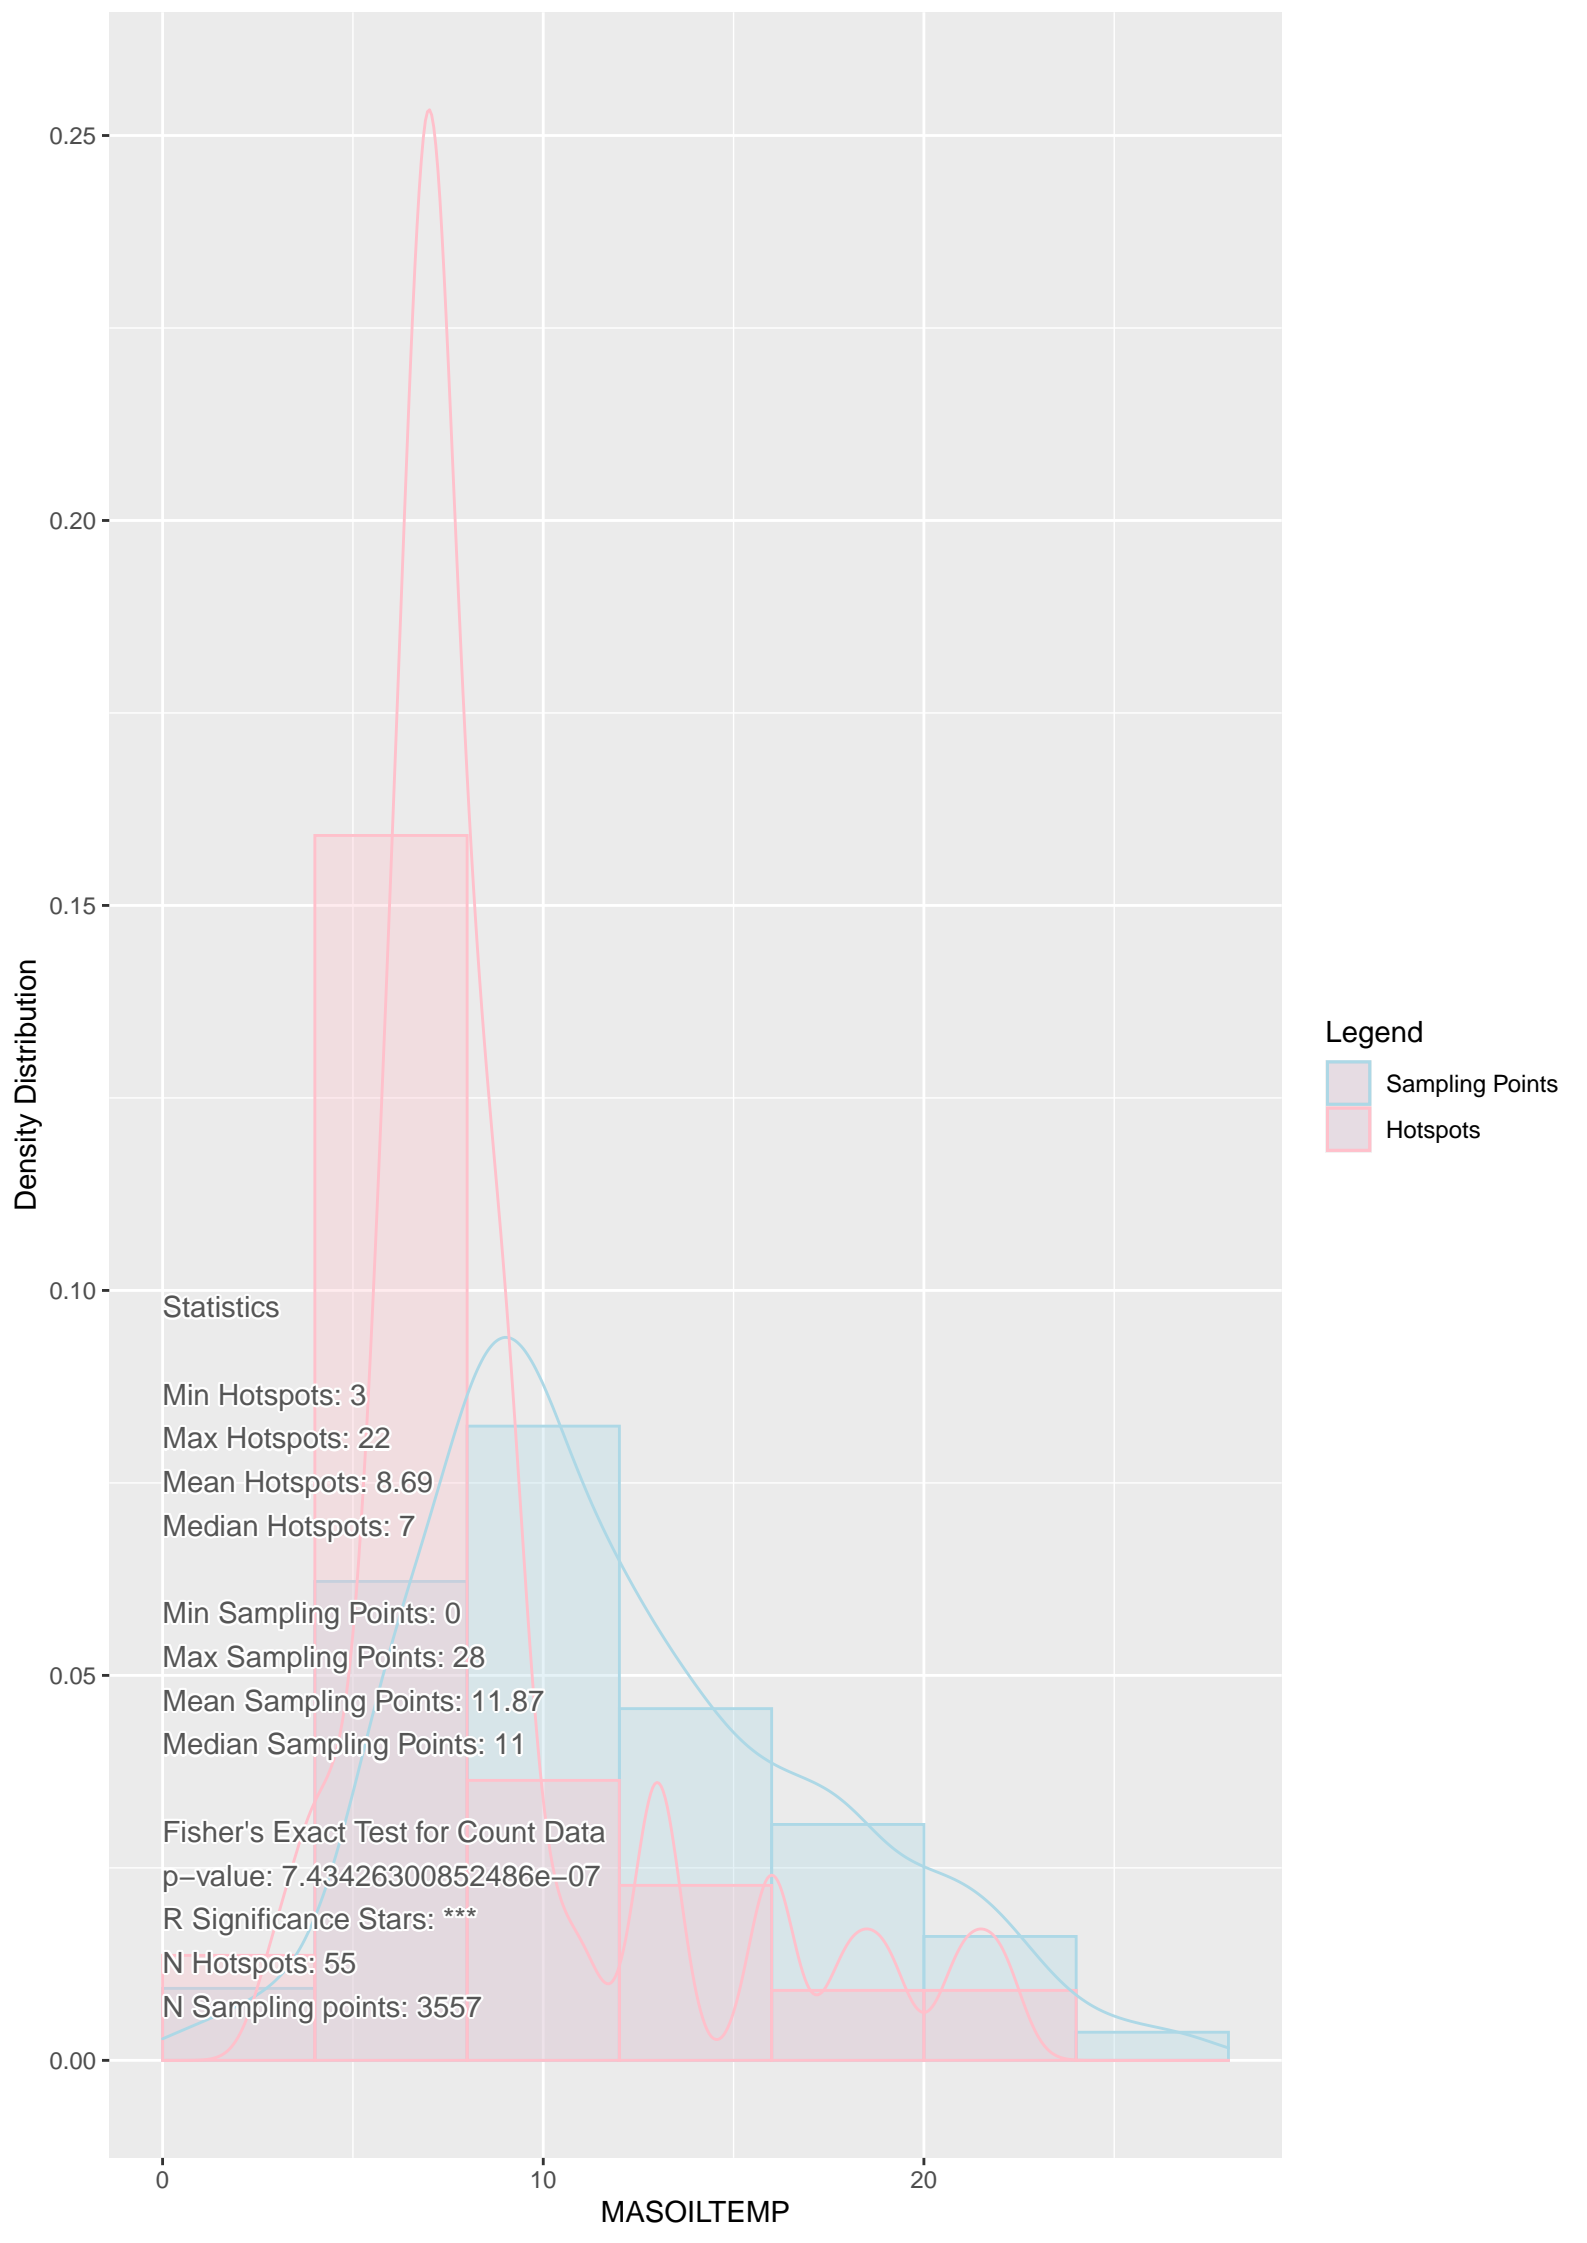



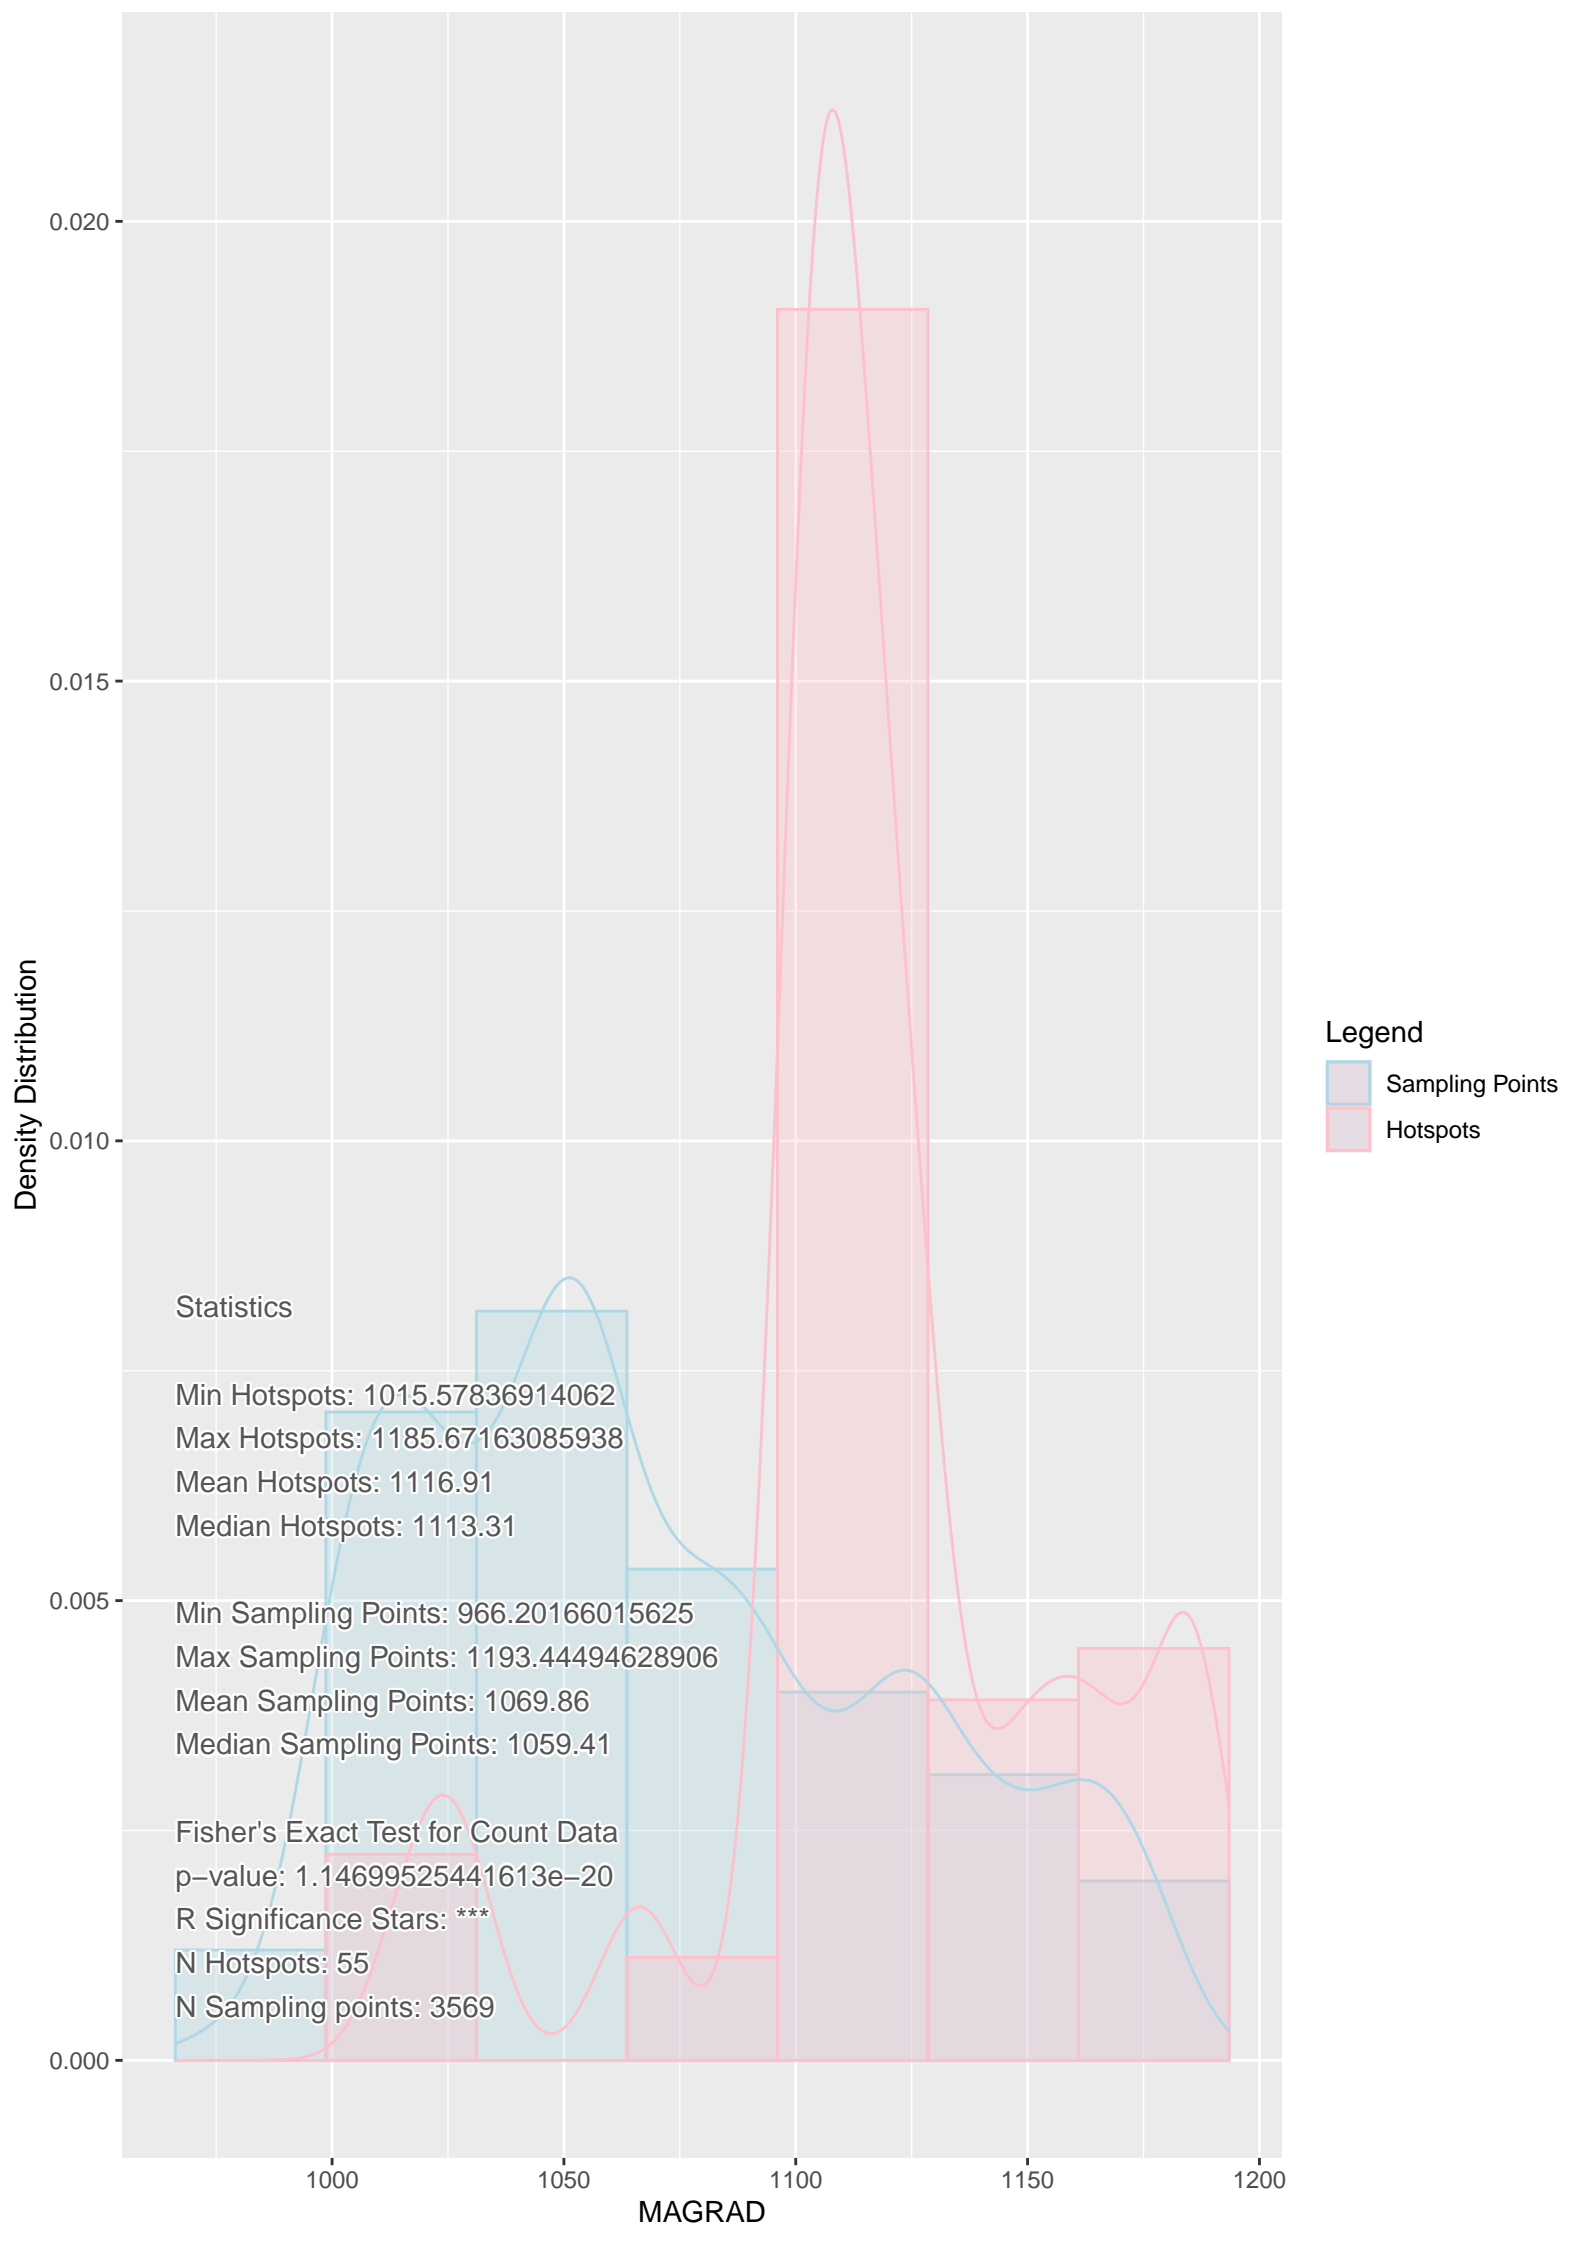

Supplement: s1 [file s1]
